# Supplementary material for: Enhanced plant-derived vesicles for nucleotide delivery for cancer therapy
Source: PubMed Central journal article supplement (PMC10998889; doi:10.1038/s41698-024-00556-3), 2024-04-06
Supplement: 41698_2024_556_MOESM1_ESM.pdf [file 41698_2024_556_MOESM1_ESM.pdf]

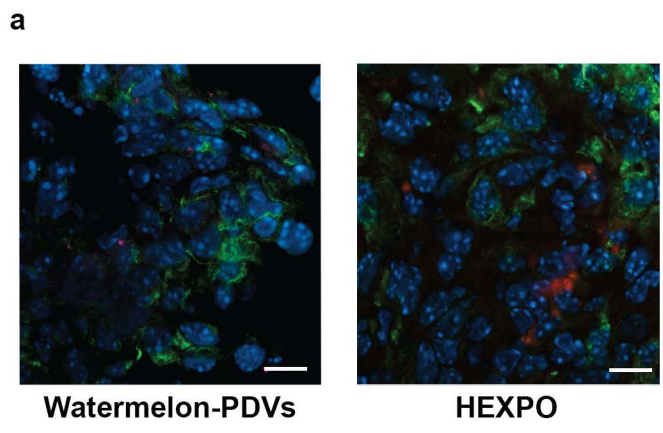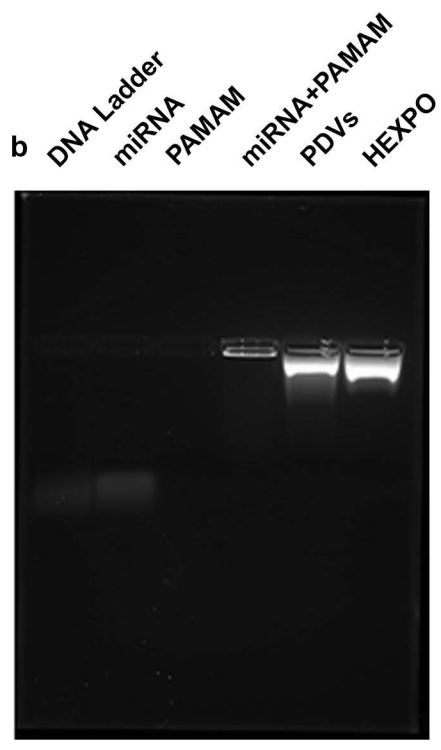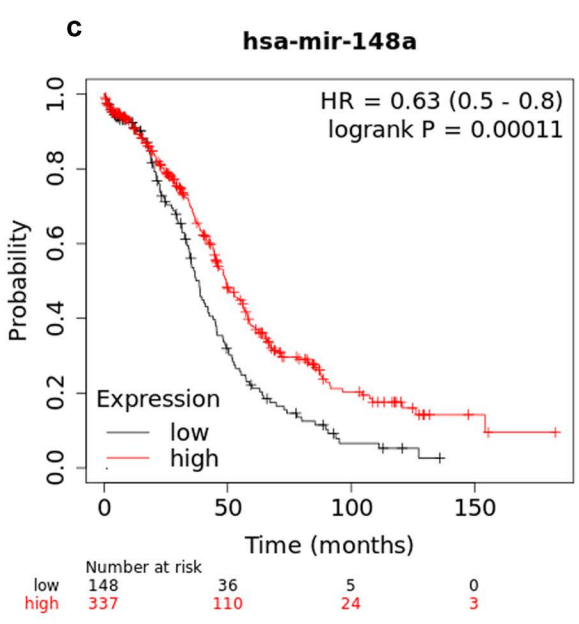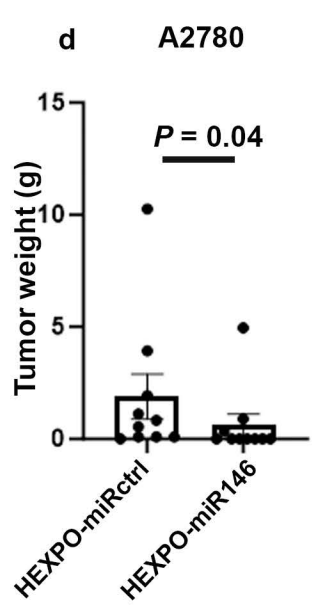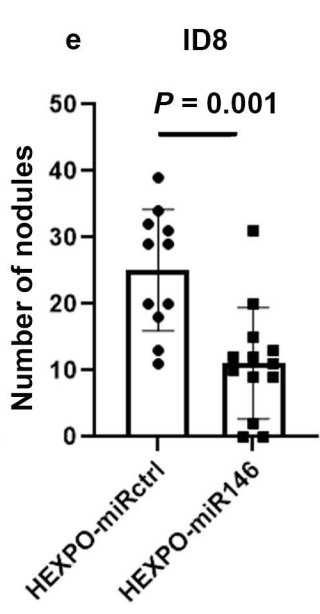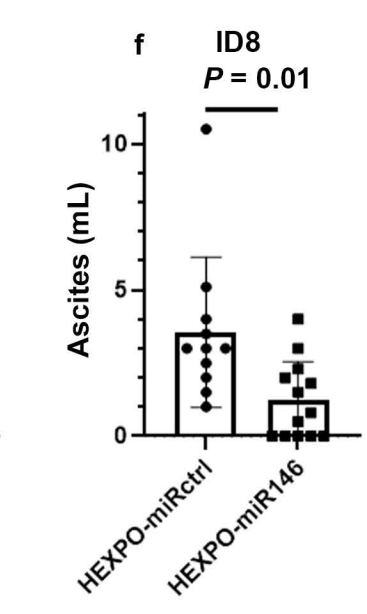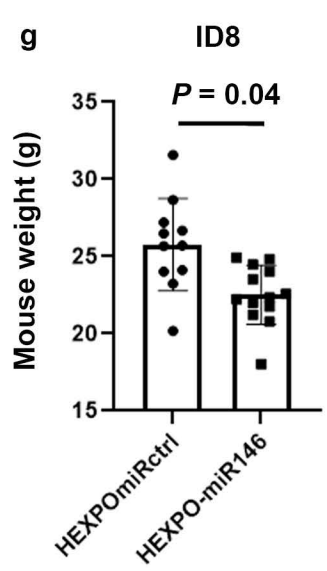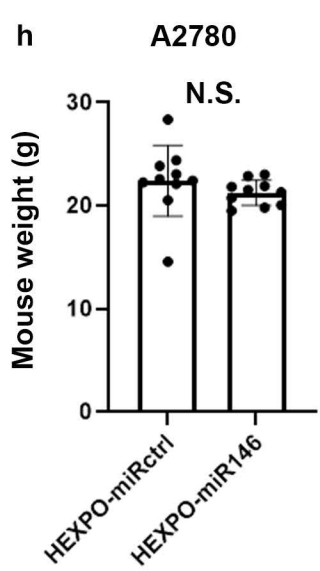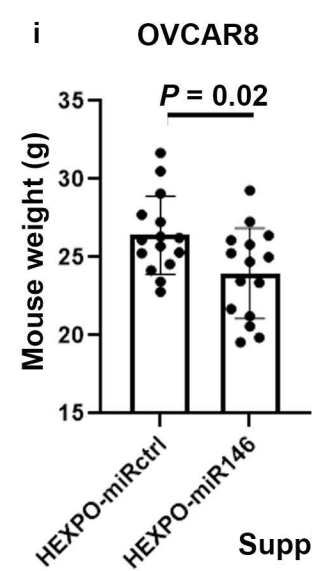

**Supplementary Figure 1:** A) Watermelon-PDVs (fuchsia) and HEXPO (red) uptake from cytokeratin positive (green) tumor cells in ID8 tumor nodules. Scale bar= 10  $\mu$ m. B) Electrophoresis retardation assay; C) Kaplan Meier curve representing survival in ovarian cancer patients with high and low tumor expression of miR148a (kmplotter.com); D) Quantification of tumor weight from the A2780 *in vivo* model treated with hybrid exosomal polymeric control microRNA (HEXPO-miRctrl) and hybrid exosomal polymeric miR146a (HEXPO-miR-146), without outliers exclusion (dots represent each sample, bars represent means, and whiskers the standard error of the mean) E) Quantification of tumor nodules from the ID8 *in vivo* model treated with hybrid exosomal polymeric control microRNA (HEXPO-miRctrl) and hybrid exosomal polymeric miR146a (HEXPO-miR-146); F) Quantification of ascites from the ID8 *in vivo* model; G) Quantification of body weight from the ID8 *in vivo* model; H) Quantification of body weight from the A2780 *in vivo* model in mice treated with HEXPO-ctrl *versus* HEXPO-miR146; I) Quantification of body weight from the OVCAR8 *in vivo* model in mice treated with HEXPO-ctrl *versus* HEXPO-miR146.

ABBREVIATIONS: miRctrl = mirna negative control; miR146 = mirna 146a.

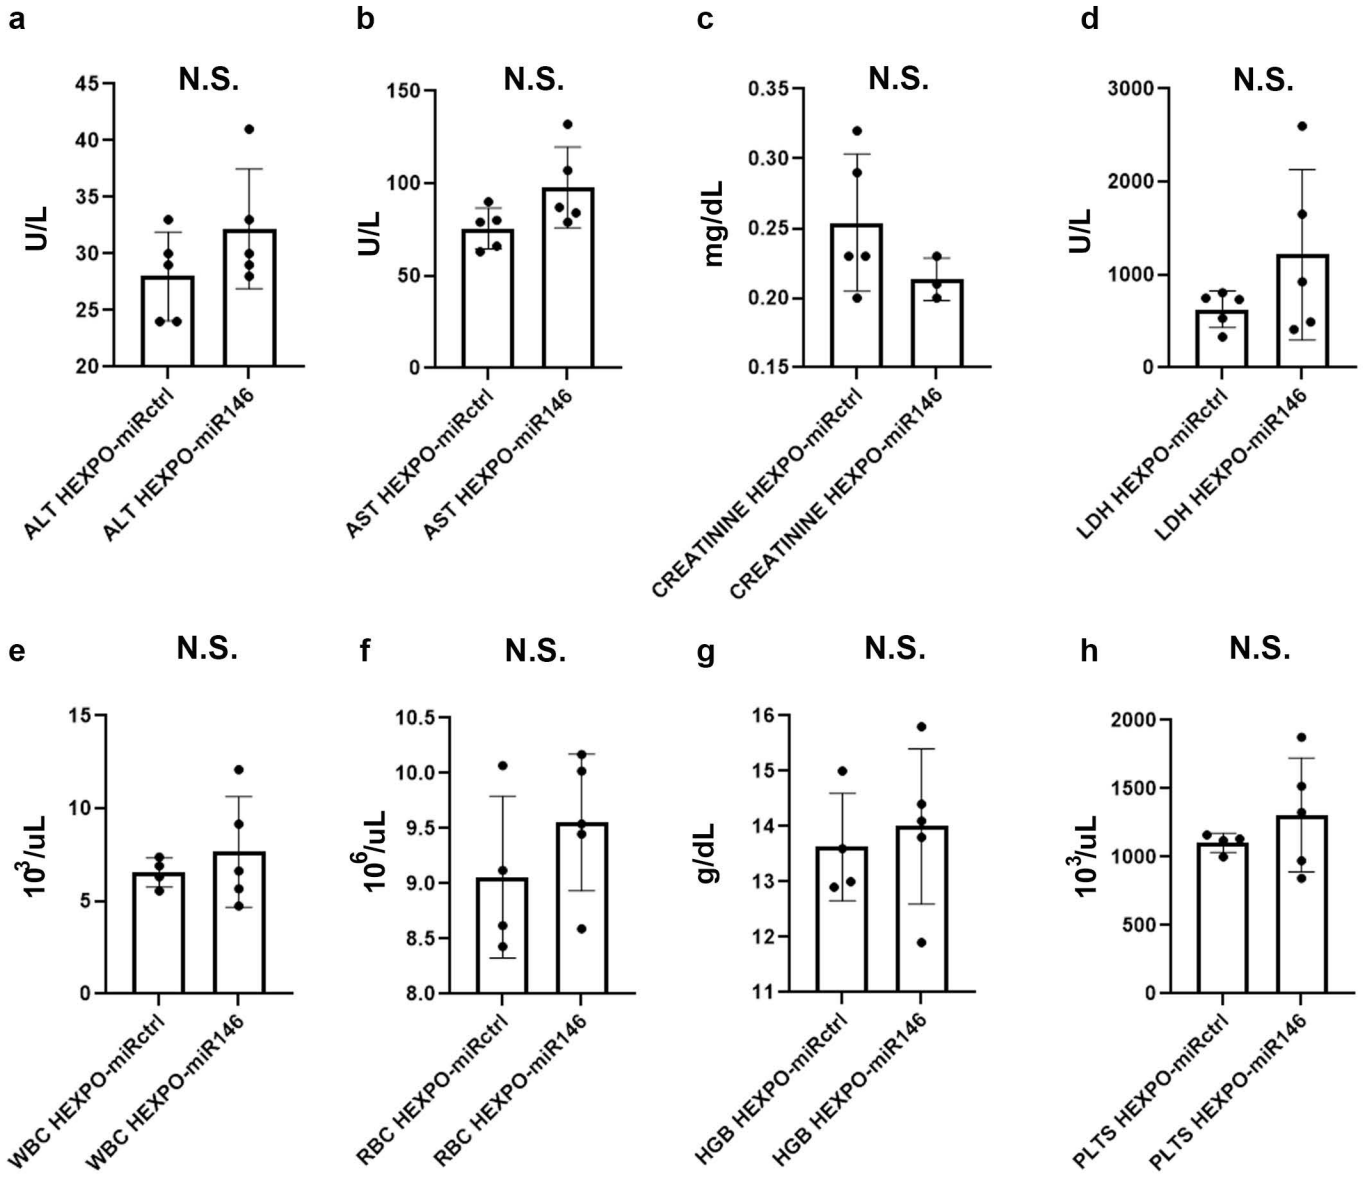

**Supplementary Figure 2:** Serum levels of ALT (A), AST (B), creatinine (C), LDH (D), WBC (E ), RBC (F), HBG (G), PLTS (H) in mouse treated with HEXPO-ctrl *versus* HEXPO-miR146 in the OVCAR8 in vivo model.

ABBREVIATIONS: miRctrl = mirna negative control; miR146 = mirna 146a; ALT = serum alanine transaminase; AST = Serum aspartate transaminase; LDH = lactate dehydrogenase; WBC = white blood cells; RBC = red blood cells; HBG = hemoglobin; PLTS = platelets.

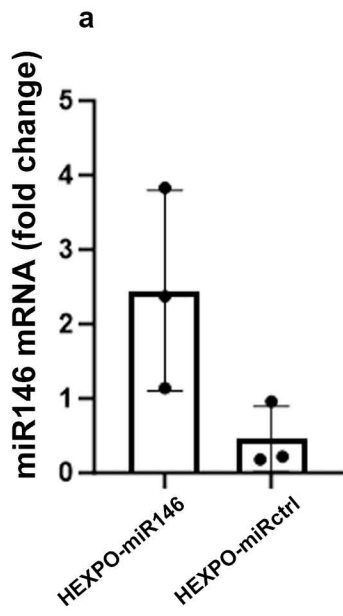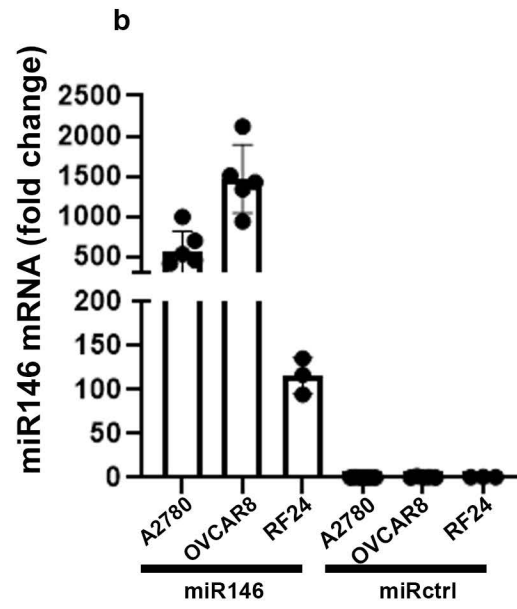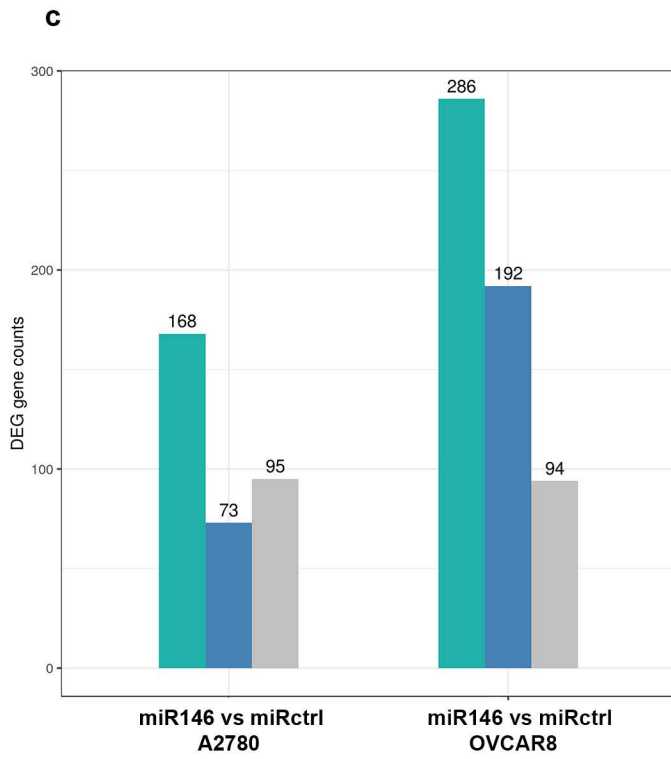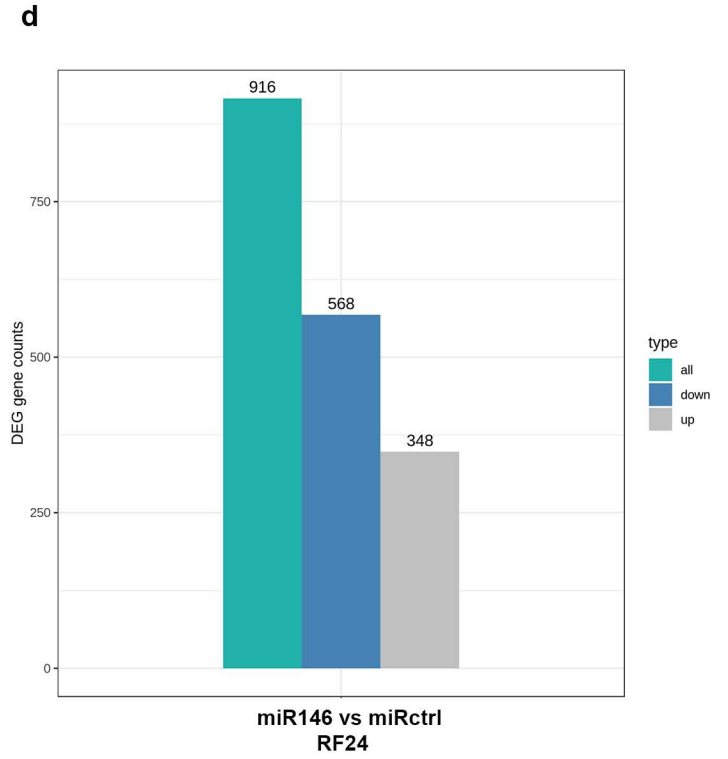

**Supplementary Figure 3:** A) miR146 expression in tumors from ID8 mice treated with HEXPO-miRctrl or HEXPO-miR146; B) miR146 expression in A2780, OVCAR8 and RF24 cells transfected with miR146 or miRctrl; C) DEG counts of all, downregulated and upregulated genes in A2780 and OVCAR8 cells transfected with miR146 versus A2780 and OVCAR8 cells transfected with miRctrl; D) DEG counts of all, downregulated and upregulated genes in RF24 cells transfected with miR146 versus RF24 cells transfected with miRctrl. MiR146 expression is calculated as fold change over housekeeping gene. Bars in histograms represent mean values and whiskers represent standard deviation from the mean.

ABBREVIATIONS: miRctrl = mirna negative control; miR146 = mirna 146a, DEG= differentially expressed genes.

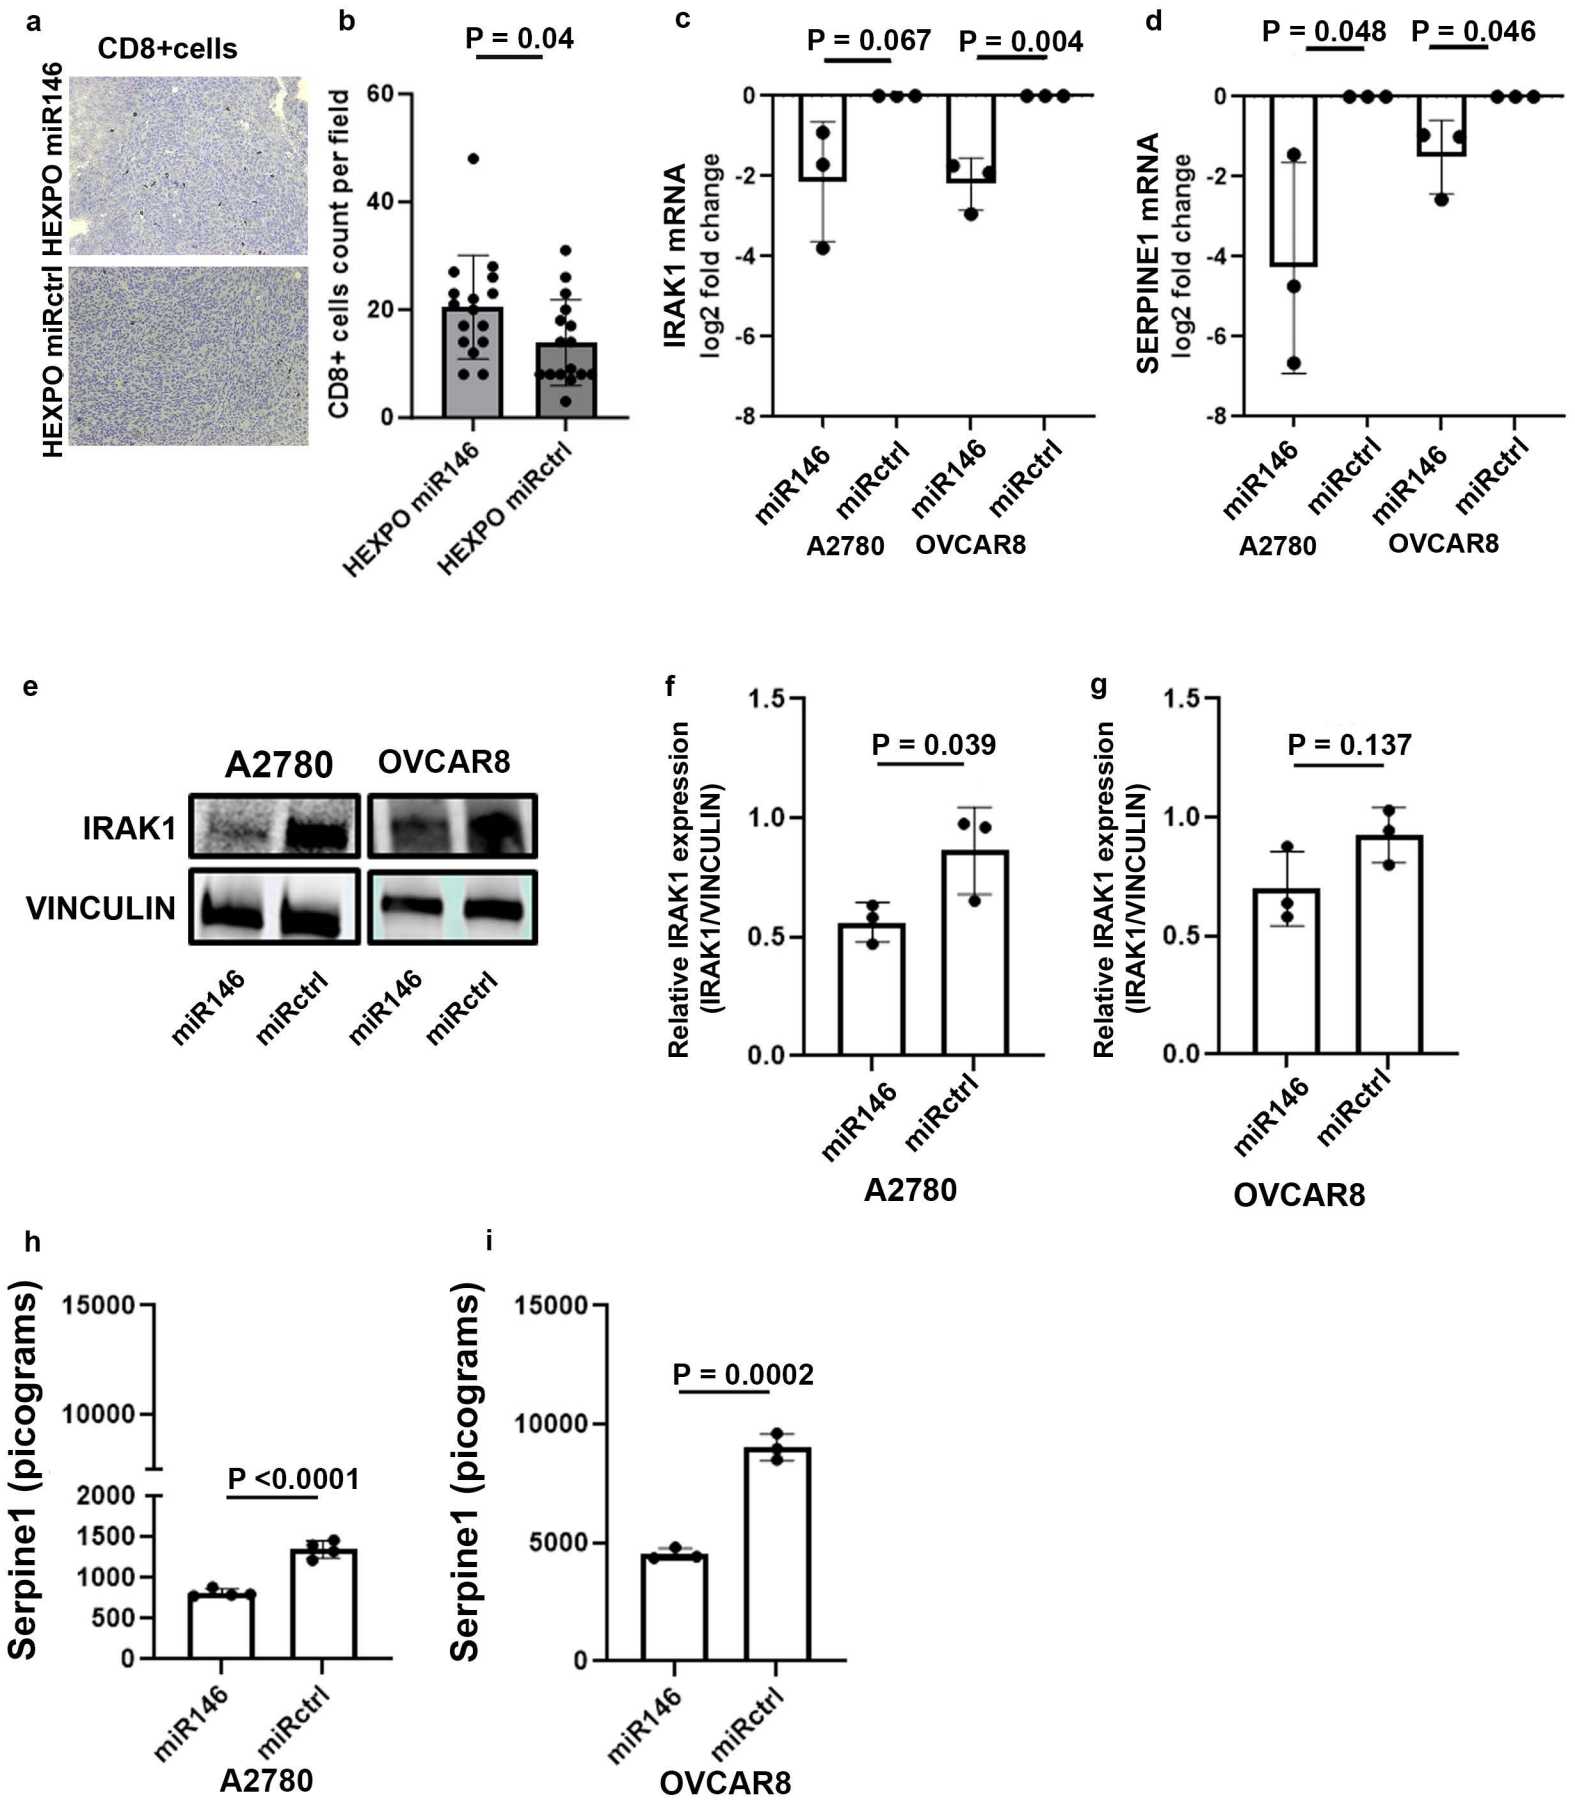

Supplementary Figure 4

**Supplementary Figure 4:** A) representative pictures from 20X magnification quadrants of tumor sections from the ID8 mouse model treated with HEXPO-ctrl and HEXPO-miR146 stained with anti-CD8 antibody, and quantification of CD8-positive cells in B); C) IRAK1 mRNA differential expression in  $\log_2$  fold change between miR146 and miRctrl treated A2780 and OVCAR8 cells; D) SERPINE1 mRNA differential expression in  $\log_2$  fold change between miR146 and miRctrl treated A2780 and OVCAR8 cells; E, F, and G) Western blot with quantification showing IRAK1 protein expression in miR146 and miRctrl treated A2780 and OVCAR8 cells normalized to vimentin (the pale blue background is an artifact from the imaging software); H and I) Quantification of ELISA assay showing SERPINE1 protein expression in the supernatant from miR146 and miRctrl treated A2780 and OVCAR8 cells.



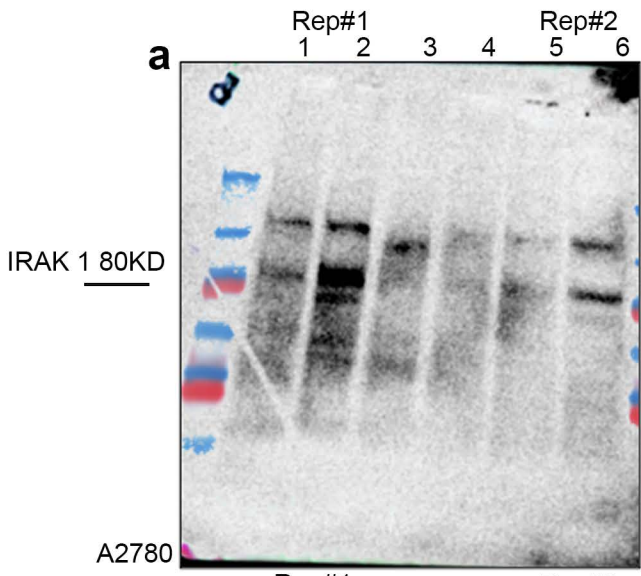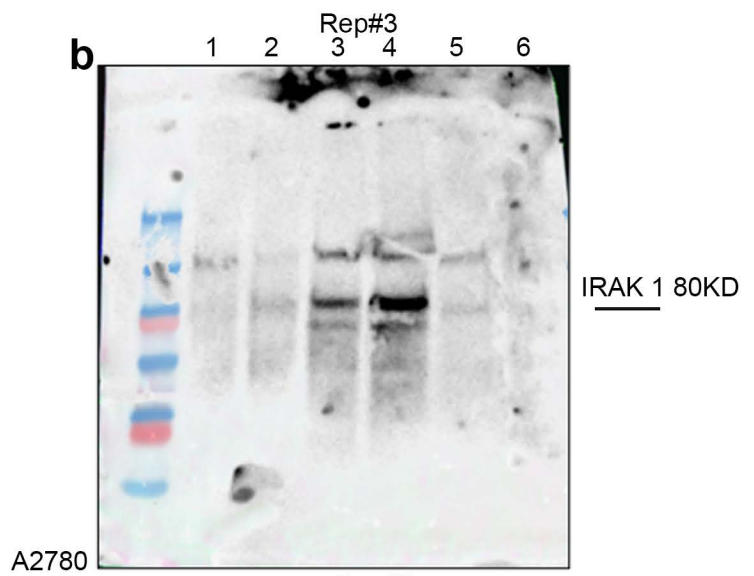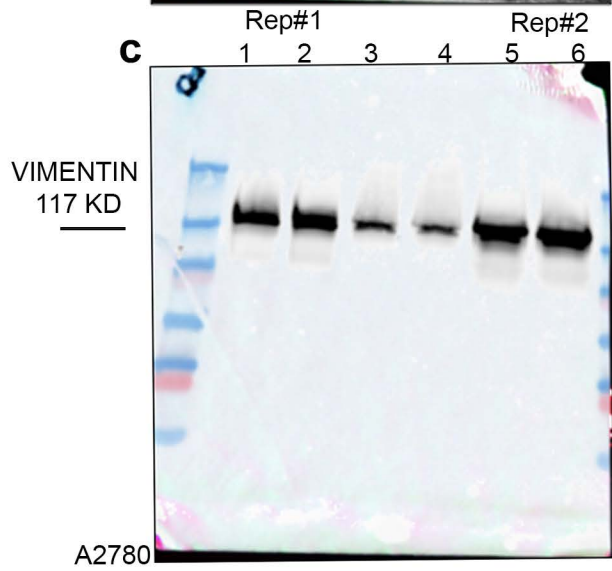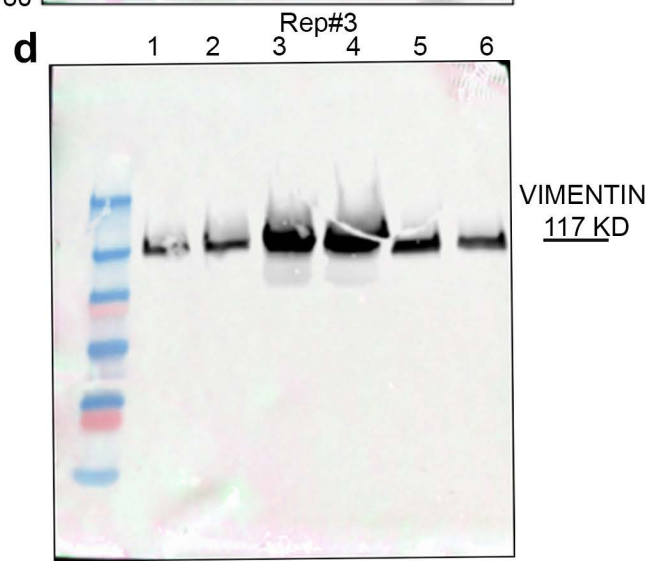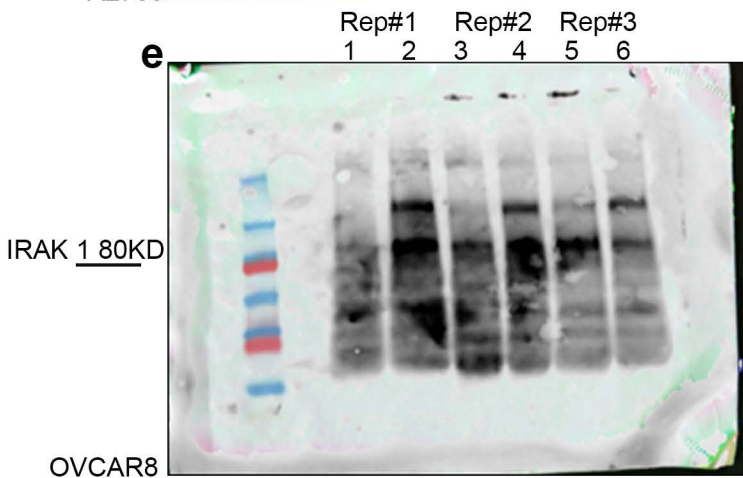

1, 3, 5= miR146  
2, 4, 6= miRctrl

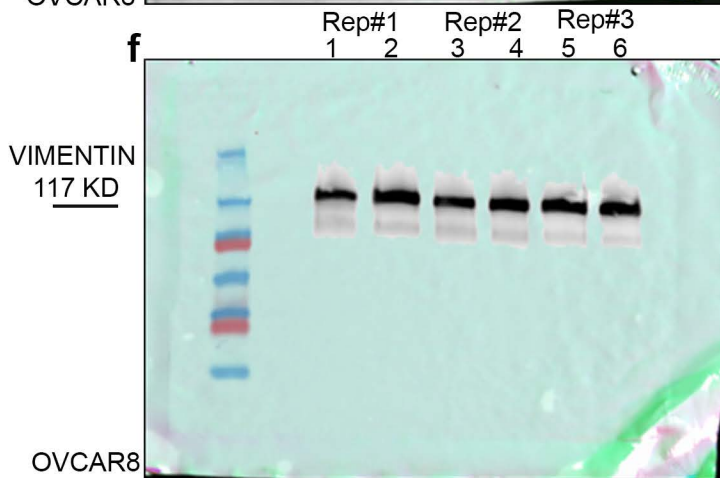

**Supplementary Figure 5:** Original acquired blots from Western Blot analysis (three experimental triplicates) of IRAK1 protein expression in A2780 cells (A and B), and OVCAR8 cells ( E), and VINCULIN as housekeeping protein (C, D and F). Rep= replicate

| Database                           | Pathway                                             | Evidence                 | Hits | Expected hits | P value |
|------------------------------------|-----------------------------------------------------|--------------------------|------|---------------|---------|
| Gene Ontology - Biological Process | RNA metabolic process                               | predicted (intersection) | 963  | 814.2         | 3.90e-8 |
| Gene Ontology - Biological Process | RNA metabolic process                               | predicted (intersection) | 810  | 670.2         | 3.90e-8 |
| Gene Ontology - Biological Process | regulation of gene expression                       | predicted (intersection) | 936  | 785.7         | 3.90e-8 |
| Gene Ontology - Biological Process | transcription, DNA-templated                        | predicted (intersection) | 788  | 650.5         | 3.90e-8 |
| Gene Ontology - Biological Process | transcription by RNA polymerase II                  | predicted (intersection) | 627  | 505.4         | 9.25e-8 |
| Gene Ontology - Biological Process | RNA biosynthetic process                            | predicted (intersection) | 798  | 663.9         | 1.02e-7 |
| Gene Ontology - Biological Process | transcription, DNA-templated                        | predicted (intersection) | 745  | 616.3         | 1.50e-7 |
| Gene Ontology - Biological Process | RNA biosynthetic process                            | predicted (intersection) | 758  | 632.1         | 3.54e-7 |
| Gene Ontology - Biological Process | nucleic acid-templated transcription                | predicted (intersection) | 757  | 630.6         | 3.54e-7 |
| Gene Ontology - Biological Process | transcription by RNA polymerase II                  | predicted (intersection) | 589  | 476.3         | 3.54e-7 |
| Gene Ontology - Biological Process | regulation of cellular metabolic process            | predicted (intersection) | 679  | 562           | 9.12e-7 |
| Gene Ontology - Biological Process | positive regulation of metabolic process            | predicted (intersection) | 732  | 615.3         | 2.96e-6 |
| Gene Ontology - Biological Process | positive regulation of transcription, DNA-templated | predicted (intersection) | 337  | 260.4         | 1.93e-5 |
| Gene Ontology - Biological Process | anatomical structure morphogenesis                  | predicted (union)        | 989  | 867.6         | 2.30e-5 |

|                                       |                                                                          |                             |     |       |         |
|---------------------------------------|--------------------------------------------------------------------------|-----------------------------|-----|-------|---------|
| Gene Ontology -<br>Biological Process | positive<br>regulation of<br>RNA<br>biosynthetic<br>process              | predicted<br>(union)        | 627 | 530.2 | 2.30e-5 |
| Gene Ontology -<br>Biological Process | positive<br>regulation of<br>nucleic acid-<br>templated<br>transcription | predicted<br>(union)        | 627 | 529.8 | 2.30e-5 |
| Gene Ontology -<br>Biological Process | positive<br>regulation of<br>transcription,<br>DNA-<br>templated         | predicted<br>(union)        | 589 | 493.6 | 2.30e-5 |
| Gene Ontology -<br>Biological Process | nervous<br>system<br>development                                         | predicted<br>(union)        | 897 | 784.5 | 2.35e-5 |
| Gene Ontology -<br>Biological Process | positive<br>regulation of<br>gene<br>expression                          | predicted<br>(union)        | 745 | 641   | 2.35e-5 |
| Gene Ontology -<br>Biological Process | positive<br>regulation of<br>macromolecul<br>e biosynthetic<br>process   | predicted<br>(union)        | 719 | 617.6 | 2.35e-5 |
| Gene Ontology -<br>Biological Process | positive<br>regulation of<br>transcription<br>by RNA<br>polymerase II    | predicted<br>(union)        | 454 | 372.8 | 2.35e-5 |
| Gene Ontology -<br>Biological Process | positive<br>regulation of<br>gene<br>expression                          | predicted<br>(intersection) | 423 | 338.1 | 2.52e-5 |
| Gene Ontology -<br>Biological Process | negative<br>regulation of<br>transcription<br>by RNA<br>polymerase II    | predicted<br>(union)        | 336 | 267.5 | 2.52e-5 |
| Gene Ontology -<br>Biological Process | regulation of<br>cell<br>differentiation                                 | predicted<br>(union)        | 706 | 606.5 | 2.54e-5 |

|                                       |                                                                          |                             |     |       |         |
|---------------------------------------|--------------------------------------------------------------------------|-----------------------------|-----|-------|---------|
| Gene Ontology -<br>Biological Process | negative<br>regulation of<br>cellular<br>metabolic<br>process            | predicted<br>(intersection) | 524 | 430.8 | 2.78e-5 |
| Gene Ontology -<br>Biological Process | positive<br>regulation of<br>RNA<br>biosynthetic<br>process              | predicted<br>(intersection) | 357 | 279.7 | 2.78e-5 |
| Gene Ontology -<br>Biological Process | positive<br>regulation of<br>nucleic acid-<br>templated<br>transcription | predicted<br>(intersection) | 357 | 279.4 | 2.78e-5 |
| Gene Ontology -<br>Biological Process | positive<br>regulation of<br>transcription<br>by RNA<br>polymerase II    | predicted<br>(intersection) | 262 | 196.6 | 3.63e-5 |
| Gene Ontology -<br>Biological Process | positive<br>regulation of<br>cellular<br>biosynthetic<br>process         | predicted<br>(union)        | 747 | 646.2 | 3.66e-5 |
| Gene Ontology -<br>Biological Process | positive<br>regulation of<br>macromolecul<br>e biosynthetic<br>process   | predicted<br>(intersection) | 407 | 325.8 | 4.01e-5 |
| Gene Ontology -<br>Biological Process | anatomical<br>structure<br>morphogenesis                                 | predicted<br>(intersection) | 551 | 457.6 | 4.25e-5 |
| Gene Ontology -<br>Biological Process | positive<br>regulation of<br>cellular<br>biosynthetic<br>process         | predicted<br>(intersection) | 421 | 340.9 | 8.64e-5 |
| Gene Ontology -<br>Biological Process | cellular protein<br>modification<br>process                              | predicted<br>(intersection) | 824 | 717.2 | 9.49e-5 |
| Gene Ontology -<br>Biological Process | nervous<br>system<br>development                                         | predicted<br>(intersection) | 500 | 413.8 | 9.49e-5 |

|                                       |                                                                          |                             |     |       |         |
|---------------------------------------|--------------------------------------------------------------------------|-----------------------------|-----|-------|---------|
| Gene Ontology -<br>Biological Process | protein<br>modification<br>process                                       | predicted<br>(intersection) | 824 | 717.2 | 9.49e-5 |
| Gene Ontology -<br>Biological Process | urogenital<br>system<br>development                                      | predicted<br>(intersection) | 99  | 62.26 | 9.49e-5 |
| Gene Ontology -<br>Biological Process | tube<br>development                                                      | predicted<br>(union)        | 432 | 358.1 | 1.08e-4 |
| Gene Ontology -<br>Biological Process | negative<br>regulation of<br>cellular<br>metabolic<br>process            | predicted<br>(union)        | 920 | 816.7 | 2.49e-4 |
| Gene Ontology -<br>Biological Process | tube<br>morphogenesis                                                    | predicted<br>(union)        | 352 | 289.3 | 4.82e-4 |
| Gene Ontology -<br>Biological Process | intracellular<br>signal<br>transduction                                  | predicted<br>(union)        | 985 | 882.7 | 5.97e-4 |
| Gene Ontology -<br>Biological Process | enzyme linked<br>receptor<br>protein<br>signaling<br>pathway             | predicted<br>(intersection) | 233 | 178.2 | 5.98e-4 |
| Gene Ontology -<br>Biological Process | regulation of<br>cell<br>differentiation                                 | predicted<br>(intersection) | 388 | 319.9 | 0.001   |
| Gene Ontology -<br>Biological Process | tube<br>development                                                      | predicted<br>(intersection) | 243 | 188.9 | 0.001   |
| Gene Ontology -<br>Biological Process | enzyme linked<br>receptor<br>protein<br>signaling<br>pathway             | predicted<br>(union)        | 402 | 337.8 | 0.001   |
| Gene Ontology -<br>Biological Process | heart<br>development                                                     | predicted<br>(union)        | 240 | 191.2 | 0.001   |
| Gene Ontology -<br>Biological Process | negative<br>regulation of<br>nucleic acid-<br>templated<br>transcription | predicted<br>(union)        | 463 | 394.6 | 0.001   |

|                                       |                                                                  |                             |     |       |       |
|---------------------------------------|------------------------------------------------------------------|-----------------------------|-----|-------|-------|
| Gene Ontology -<br>Biological Process | negative<br>regulation of<br>transcription,<br>DNA-<br>templated | predicted<br>(union)        | 441 | 373.6 | 0.001 |
| Gene Ontology -<br>Biological Process | cellular protein<br>metabolic<br>process                         | predicted<br>(intersection) | 988 | 888.4 | 0.002 |
| Gene Ontology -<br>Biological Process | response to<br>growth factor<br>muscle                           | predicted<br>(intersection) | 169 | 125.2 | 0.002 |
| Gene Ontology -<br>Biological Process | structure<br>development                                         | predicted<br>(union)        | 266 | 216.6 | 0.002 |
| Gene Ontology -<br>Biological Process | negative<br>regulation of<br>RNA<br>biosynthetic<br>process      | predicted<br>(union)        | 463 | 395.4 | 0.002 |
| Gene Ontology -<br>Biological Process | negative<br>regulation of<br>biosynthetic<br>protein             | predicted<br>(union)        | 571 | 496   | 0.002 |
| Gene Ontology -<br>Biological Process | phosphorylation<br>regulation of<br>cellular                     | predicted<br>(union)        | 732 | 649.4 | 0.002 |
| Gene Ontology -<br>Biological Process | component<br>organization                                        | predicted<br>(union)        | 893 | 802.4 | 0.002 |
| Gene Ontology -<br>Biological Process | regulation of<br>neurogenesis                                    | predicted<br>(union)        | 322 | 267.1 | 0.002 |
| Gene Ontology -<br>Biological Process | head<br>development<br>regulation of<br>cellular                 | predicted<br>(intersection) | 184 | 139.6 | 0.003 |
| Gene Ontology -<br>Biological Process | component<br>organization                                        | predicted<br>(intersection) | 497 | 423.3 | 0.003 |
| Gene Ontology -<br>Biological Process | renal system<br>development                                      | predicted<br>(intersection) | 85  | 55.76 | 0.003 |
| Gene Ontology -<br>Biological Process | cell<br>development                                              | predicted<br>(union)        | 770 | 687.1 | 0.003 |

|                                    |                                                           |                          |     |       |       |
|------------------------------------|-----------------------------------------------------------|--------------------------|-----|-------|-------|
| Gene Ontology - Biological Process | brain development                                         | predicted (intersection) | 174 | 131.7 | 0.004 |
| Gene Ontology - Biological Process | cell development                                          | predicted (intersection) | 429 | 362.5 | 0.004 |
| Gene Ontology - Biological Process | cell migration                                            | predicted (intersection) | 296 | 240.7 | 0.004 |
| Gene Ontology - Biological Process | kidney development                                        | predicted (intersection) | 81  | 53.04 | 0.004 |
| Gene Ontology - Biological Process | negative regulation of transcription by RNA polymerase II | predicted (intersection) | 185 | 141.1 | 0.004 |
| Gene Ontology - Biological Process | tube morphogenesis                                        | predicted (intersection) | 198 | 152.6 | 0.004 |
| Gene Ontology - Biological Process | negative regulation of gene expression                    | predicted (union)        | 668 | 591.4 | 0.004 |
| Gene Ontology - Biological Process | negative regulation of gene expression                    | predicted (intersection) | 373 | 311.9 | 0.005 |
| Gene Ontology - Biological Process | phosphate-containing compound metabolic process           | predicted (intersection) | 650 | 571.5 | 0.005 |
| Gene Ontology - Biological Process | dephosphorylation                                         | predicted (union)        | 205 | 163.7 | 0.005 |
| Gene Ontology - Biological Process | cellular response to growth factor stimulus               | predicted (intersection) | 159 | 119.7 | 0.006 |
| Gene Ontology - Biological Process | neurogenesis                                              | predicted (union)        | 596 | 525.4 | 0.006 |
| Gene Ontology - Biological Process | negative regulation of biosynthetic process               | predicted (intersection) | 317 | 261.6 | 0.007 |



|                                               |                                                               |                             |     |       |       |
|-----------------------------------------------|---------------------------------------------------------------|-----------------------------|-----|-------|-------|
| Gene Ontology -<br>Biological Process         | generation of<br>neurons                                      | predicted<br>(union)        | 561 | 493.6 | 0.007 |
| Gene Ontology -<br>Biological Process         | phosphorylation                                               | predicted<br>(union)        | 875 | 791.7 | 0.007 |
| Gene Ontology -<br>Biological Process         | positive<br>regulation of<br>autophagy                        | predicted<br>(union)        | 62  | 41.33 | 0.007 |
| Gene Ontology -<br>Biological Process         | positive<br>regulation of<br>cell<br>differentiation          | predicted<br>(union)        | 385 | 328.7 | 0.007 |
| Gene Ontology -<br>Biological Process         | protein<br>modification<br>by small<br>protein<br>conjugation | predicted<br>(union)        | 363 | 308.8 | 0.007 |
| Gene Ontology -<br>Biological Process         | stem cell<br>population<br>maintenance                        | predicted<br>(union)        | 82  | 57.63 | 0.007 |
| Gene Ontology -<br>Biological Process         | regulation of<br>phosphorus<br>metabolic<br>process           | predicted<br>(union)        | 645 | 573.9 | 0.008 |
| Gene+2:81<br>Ontology -<br>Biological Process | central<br>nervous<br>system<br>development                   | predicted<br>(intersection) | 222 | 176.7 | 0.010 |
| Gene Ontology -<br>Biological Process         | circadian<br>rhythm                                           | predicted<br>(intersection) | 60  | 37.94 | 0.011 |
| Gene Ontology -<br>Biological Process         | muscle<br>structure<br>development                            | predicted<br>(intersection) | 151 | 114.3 | 0.011 |
| Gene Ontology -<br>Biological Process         | immune<br>system<br>development                               | predicted<br>(union)        | 379 | 325.5 | 0.011 |
| Gene Ontology -<br>Biological Process         | regulation of<br>chromatin<br>organization                    | predicted<br>(union)        | 84  | 60.01 | 0.011 |
| Gene Ontology -<br>Biological Process         | regulation of<br>muscle organ<br>development                  | predicted<br>(union)        | 68  | 46.9  | 0.011 |
| Gene Ontology -<br>Biological Process         | vasculature<br>development                                    | predicted<br>(union)        | 292 | 245.2 | 0.011 |

|                                       |                                                           |                             |     |       |       |
|---------------------------------------|-----------------------------------------------------------|-----------------------------|-----|-------|-------|
| Gene Ontology -<br>Biological Process | cell migration                                            | predicted<br>(union)        | 518 | 456.2 | 0.012 |
| Gene Ontology -<br>Biological Process | regulation of<br>cellular protein<br>metabolic<br>process | predicted<br>(union)        | 927 | 845.7 | 0.012 |
| Gene Ontology -<br>Biological Process | response to<br>growth factor                              | predicted<br>(union)        | 283 | 237.3 | 0.012 |
| Gene Ontology -<br>Biological Process | protein<br>phosphorylation                                | predicted<br>(intersection) | 402 | 342.5 | 0.013 |
| Gene Ontology -<br>Biological Process | cellular<br>response to<br>growth factor<br>stimulus      | predicted<br>(union)        | 271 | 226.9 | 0.014 |
| Gene Ontology -<br>Biological Process | organophosph<br>ate metabolic<br>process                  | predicted<br>(union)        | 394 | 340.6 | 0.014 |
| Gene Ontology -<br>Biological Process | protein K48-<br>linked<br>ubiquitination                  | predicted<br>(union)        | 34  | 20.27 | 0.014 |
| Gene Ontology -<br>Biological Process | cell surface<br>receptor<br>signaling<br>pathway          | predicted<br>(intersection) | 586 | 516.1 | 0.015 |
| Gene Ontology -<br>Biological Process | blood vessel<br>development                               | predicted<br>(union)        | 280 | 235.7 | 0.015 |
| Gene Ontology -<br>Biological Process | cardiovascular<br>system<br>development                   | predicted<br>(union)        | 294 | 248.4 | 0.015 |
| Gene Ontology -<br>Biological Process | urogenital<br>system<br>development                       | predicted<br>(union)        | 150 | 118   | 0.015 |
| Gene Ontology -<br>Biological Process | blood vessel<br>morphogenesis                             | predicted<br>(union)        | 248 | 206.7 | 0.016 |
| Gene Ontology -<br>Biological Process | cell projection<br>morphogenesis                          | predicted<br>(union)        | 242 | 201.1 | 0.016 |
| Gene Ontology -<br>Biological Process | lipid<br>phosphorylation                                  | predicted<br>(union)        | 57  | 38.55 | 0.016 |

|                                       |                                                                 |                             |     |       |       |
|---------------------------------------|-----------------------------------------------------------------|-----------------------------|-----|-------|-------|
| Gene Ontology -<br>Biological Process | locomotion<br>regulation of<br>cellular                         | predicted<br>(union)        | 650 | 583.4 | 0.016 |
| Gene Ontology -<br>Biological Process | response to<br>stress<br>regulation of<br>intracellular         | predicted<br>(union)        | 293 | 248   | 0.016 |
| Gene Ontology -<br>Biological Process | signal<br>transduction<br>positive<br>regulation of             | predicted<br>(union)        | 675 | 607.3 | 0.016 |
| Gene Ontology -<br>Biological Process | neuron<br>apoptotic<br>process                                  | predicted<br>(intersection) | 23  | 10.9  | 0.017 |
| Gene Ontology -<br>Biological Process | regulation of<br>neurogenesis<br>coenzyme                       | predicted<br>(intersection) | 180 | 140.9 | 0.017 |
| Gene Ontology -<br>Biological Process | biosynthetic<br>process<br>anatomical<br>structure<br>formation | predicted<br>(union)        | 66  | 46.1  | 0.018 |
| Gene Ontology -<br>Biological Process | involved in<br>morphogenesis<br>negative<br>regulation of       | predicted<br>(intersection) | 242 | 197.1 | 0.019 |
| Gene Ontology -<br>Biological Process | transcription,<br>DNA-<br>templated                             | predicted<br>(intersection) | 242 | 197.1 | 0.019 |
| Gene Ontology -<br>Biological Process | regulation of<br>chromatin<br>organization                      | predicted<br>(intersection) | 51  | 31.66 | 0.019 |
| Gene Ontology -<br>Biological Process | cell adhesion<br>proteoglycan                                   | predicted<br>(union)        | 531 | 471.3 | 0.019 |
| Gene Ontology -<br>Biological Process | metabolic<br>process                                            | predicted<br>(intersection) | 30  | 15.93 | 0.020 |
| Gene Ontology -<br>Biological Process | regulation of<br>cell migration                                 | predicted<br>(intersection) | 187 | 147.8 | 0.020 |

|                                       |                                                                                     |                                 |     |       |       |
|---------------------------------------|-------------------------------------------------------------------------------------|---------------------------------|-----|-------|-------|
| Gene Ontology -<br>Biological Process | transmembran<br>e receptor<br>protein<br>tyrosine<br>kinase<br>signaling<br>pathway | predicted<br>(intersectio<br>n) | 160 | 123.9 | 0.020 |
| Gene Ontology -<br>Biological Process | locomotion                                                                          | predicted<br>(intersectio<br>n) | 362 | 307.7 | 0.021 |
| Gene Ontology -<br>Biological Process | postsynapse<br>organization                                                         | predicted<br>(intersectio<br>n) | 48  | 29.56 | 0.021 |
| Gene Ontology -<br>Biological Process | synapse<br>assembly                                                                 | predicted<br>(intersectio<br>n) | 51  | 31.86 | 0.021 |
| Gene Ontology -<br>Biological Process | regulation of<br>DNA-<br>templated<br>transcription,<br>initiation                  | predicted<br>(union)            | 21  | 11.13 | 0.021 |
| Gene Ontology -<br>Biological Process | regulation of<br>histone<br>modification                                            | predicted<br>(union)            | 70  | 49.68 | 0.021 |
| Gene Ontology -<br>Biological Process | cell part<br>morphogenesi<br>s                                                      | predicted<br>(union)            | 247 | 207.1 | 0.022 |
| Gene Ontology -<br>Biological Process | protein<br>ubiquitination                                                           | predicted<br>(union)            | 325 | 279   | 0.022 |
| Gene Ontology -<br>Biological Process | regulation of<br>lipid metabolic<br>process                                         | predicted<br>(union)            | 169 | 136.3 | 0.022 |
| Gene Ontology -<br>Biological Process | regulation of<br>osteoclast<br>differentiation                                      | predicted<br>(union)            | 37  | 23.05 | 0.022 |
| Gene Ontology -<br>Biological Process | cellular<br>response to<br>organonitroge<br>n compound                              | predicted<br>(intersectio<br>n) | 135 | 102.5 | 0.023 |
| Gene Ontology -<br>Biological Process | hair follicle<br>development                                                        | predicted<br>(intersectio<br>n) | 30  | 16.14 | 0.023 |

|                                    |                                                                  |                          |     |       |       |
|------------------------------------|------------------------------------------------------------------|--------------------------|-----|-------|-------|
| Gene Ontology - Biological Process | anatomical structure formation involved in morphogenesis         | predicted (union)        | 426 | 373.6 | 0.023 |
| Gene Ontology - Biological Process | transmembrane receptor protein tyrosine kinase signaling pathway | predicted (union)        | 277 | 234.9 | 0.023 |
| Gene Ontology - Biological Process | positive regulation of protein modification process              | predicted (union)        | 447 | 393.8 | 0.026 |
| Gene Ontology - Biological Process | cell motility                                                    | predicted (intersection) | 316 | 266.7 | 0.027 |
| Gene Ontology - Biological Process | regulation of cell motility                                      | predicted (intersection) | 198 | 158.9 | 0.027 |
| Gene Ontology - Biological Process | regulation of cellular protein metabolic process                 | predicted (intersection) | 508 | 446.1 | 0.027 |
| Gene Ontology - Biological Process | vasculature development                                          | predicted (intersection) | 165 | 129.3 | 0.027 |
| Gene Ontology - Biological Process | blood vessel development                                         | predicted (intersection) | 159 | 124.3 | 0.028 |
| Gene Ontology - Biological Process | generation of neurons                                            | predicted (intersection) | 309 | 260.4 | 0.028 |
| Gene Ontology - Biological Process | negative regulation of nucleic acid-templated transcription      | predicted (intersection) | 252 | 208.2 | 0.028 |

|                                       |                                                                                                                 |                             |     |       |       |
|---------------------------------------|-----------------------------------------------------------------------------------------------------------------|-----------------------------|-----|-------|-------|
| Gene Ontology -<br>Biological Process | negative<br>regulation of<br>transcription<br>from RNA<br>polymerase II<br>promoter in<br>response to<br>stress | predicted<br>(intersection) | 8   | 2.306 | 0.028 |
| Gene Ontology -<br>Biological Process | neurogenesis                                                                                                    | predicted<br>(intersection) | 327 | 277.1 | 0.028 |
| Gene Ontology -<br>Biological Process | regulation of<br>cellular<br>component<br>movement                                                              | predicted<br>(intersection) | 214 | 173.6 | 0.028 |
| Gene Ontology -<br>Biological Process | regulation of<br>protein<br>metabolic<br>process                                                                | predicted<br>(union)        | 978 | 901.8 | 0.028 |
| Gene Ontology -<br>Biological Process | heart<br>development                                                                                            | predicted<br>(intersection) | 132 | 100.8 | 0.029 |
| Gene Ontology -<br>Biological Process | negative<br>regulation of<br>RNA<br>biosynthetic<br>process                                                     | predicted<br>(intersection) | 252 | 208.6 | 0.029 |
| Gene Ontology -<br>Biological Process | regulation of<br>organelle<br>organization                                                                      | predicted<br>(intersection) | 260 | 215.9 | 0.029 |
| Gene Ontology -<br>Biological Process | retina<br>vasculature<br>development<br>in camera-<br>type eye                                                  | predicted<br>(intersection) | 10  | 3.354 | 0.029 |
| Gene Ontology -<br>Biological Process | rhythmic<br>process                                                                                             | predicted<br>(intersection) | 79  | 55.34 | 0.029 |
| Gene Ontology -<br>Biological Process | striated<br>muscle tissue<br>development                                                                        | predicted<br>(union)        | 158 | 127.2 | 0.029 |
| Gene Ontology -<br>Biological Process | cardiovascular<br>system<br>development                                                                         | predicted<br>(intersection) | 166 | 131   | 0.030 |
| Gene Ontology -<br>Biological Process | hair cycle<br>process                                                                                           | predicted<br>(intersection) | 30  | 16.56 | 0.030 |

|                                       |                                                            |                             |     |       |       |
|---------------------------------------|------------------------------------------------------------|-----------------------------|-----|-------|-------|
| Gene Ontology -<br>Biological Process | regulation of<br>glycoprotein<br>biosynthetic<br>process   | predicted<br>(intersection) | 16  | 6.918 | 0.030 |
| Gene Ontology -<br>Biological Process | skin epidermis<br>development                              | predicted<br>(intersection) | 30  | 16.56 | 0.030 |
| Gene Ontology -<br>Biological Process | regulation of<br>striated<br>muscle tissue<br>development  | predicted<br>(union)        | 64  | 45.31 | 0.030 |
| Gene Ontology -<br>Biological Process | cell motility                                              | predicted<br>(union)        | 564 | 505.5 | 0.031 |
| Gene Ontology -<br>Biological Process | muscle cell<br>differentiation                             | predicted<br>(union)        | 144 | 114.9 | 0.031 |
| Gene Ontology -<br>Biological Process | regulation of<br>locomotion                                | predicted<br>(union)        | 374 | 326.3 | 0.031 |
| Gene Ontology -<br>Biological Process | regulation of<br>neuron<br>apoptotic<br>process            | predicted<br>(intersection) | 59  | 39.2  | 0.032 |
| Gene Ontology -<br>Biological Process | covalent<br>chromatin<br>modification                      | predicted<br>(union)        | 188 | 154.6 | 0.032 |
| Gene Ontology -<br>Biological Process | positive<br>regulation of<br>signal<br>transduction        | predicted<br>(union)        | 614 | 553.6 | 0.033 |
| Gene Ontology -<br>Biological Process | muscle tissue<br>development                               | predicted<br>(union)        | 163 | 132.3 | 0.034 |
| Gene Ontology -<br>Biological Process | positive<br>regulation of<br>protein kinase<br>B signaling | predicted<br>(union)        | 81  | 60.01 | 0.034 |
| Gene Ontology -<br>Biological Process | regulation of<br>JNK cascade                               | predicted<br>(union)        | 82  | 60.81 | 0.034 |
| Gene Ontology -<br>Biological Process | regulation of<br>phosphorylation                           | predicted<br>(union)        | 564 | 506.3 | 0.034 |

|                                    |                                                           |                          |     |       |       |
|------------------------------------|-----------------------------------------------------------|--------------------------|-----|-------|-------|
| Gene Ontology - Biological Process | tissue morphogenesis                                      | predicted (union)        | 264 | 224.5 | 0.034 |
| Gene Ontology - Biological Process | phosphorylation                                           | predicted (intersection) | 475 | 417.6 | 0.035 |
| Gene Ontology - Biological Process | positive regulation of cellular protein metabolic process | predicted (intersection) | 317 | 269.6 | 0.035 |
| Gene Ontology - Biological Process | positive regulation of glycoprotein biosynthetic process  | predicted (intersection) | 11  | 3.983 | 0.035 |
| Gene Ontology - Biological Process | positive regulation of protein modification process       | predicted (intersection) | 250 | 207.8 | 0.035 |
| Gene Ontology - Biological Process | regulation of locomotion neuron projection                | predicted (intersection) | 211 | 172.1 | 0.035 |
| Gene Ontology - Biological Process | morphogenesis                                             | predicted (union)        | 231 | 194.3 | 0.035 |
| Gene Ontology - Biological Process | glycoprotein metabolic process                            | predicted (intersection) | 95  | 69.6  | 0.036 |
| Gene Ontology - Biological Process | JNK cascade                                               | predicted (union)        | 95  | 72.33 | 0.036 |
| Gene Ontology - Biological Process | cell-cell signaling                                       | predicted (union)        | 593 | 534.5 | 0.036 |
| Gene Ontology - Biological Process | macroautophagy                                            | predicted (union)        | 124 | 97.77 | 0.036 |
| Gene Ontology - Biological Process | morphogenesis of an epithelium                            | predicted (union)        | 223 | 187.2 | 0.036 |
| Gene Ontology - Biological Process | phosphatidylinositol metabolic process                    | predicted (union)        | 95  | 72.33 | 0.036 |



|                                       |                                                         |                             |     |       |       |
|---------------------------------------|---------------------------------------------------------|-----------------------------|-----|-------|-------|
| Gene Ontology -<br>Biological Process | regulation of<br>neuron<br>differentiation              | predicted<br>(union)        | 249 | 211   | 0.036 |
| Gene Ontology -<br>Biological Process | regulation of<br>organelle<br>organization              | predicted<br>(union)        | 461 | 409.3 | 0.036 |
| Gene Ontology -<br>Biological Process | lung alveolus<br>development                            | predicted<br>(intersection) | 18  | 8.386 | 0.037 |
| Gene Ontology -<br>Biological Process | neuron<br>apoptotic<br>process                          | predicted<br>(intersection) | 65  | 44.44 | 0.037 |
| Gene Ontology -<br>Biological Process | animal organ<br>morphogenesis                           | predicted<br>(union)        | 400 | 352.1 | 0.037 |
| Gene Ontology -<br>Biological Process | cell<br>morphogenesis                                   | predicted<br>(union)        | 353 | 308   | 0.037 |
| Gene Ontology -<br>Biological Process | cellular lipid<br>metabolic<br>process                  | predicted<br>(union)        | 390 | 343   | 0.038 |
| Gene Ontology -<br>Biological Process | regulation of<br>cell migration                         | predicted<br>(union)        | 323 | 280.2 | 0.038 |
| Gene Ontology -<br>Biological Process | regulation of<br>dendritic spine<br>development         | predicted<br>(union)        | 36  | 23.05 | 0.038 |
| Gene Ontology -<br>Biological Process | cell<br>morphogenesis<br>involved in<br>differentiation | predicted<br>(union)        | 262 | 223.8 | 0.040 |
| Gene Ontology -<br>Biological Process | gland<br>development                                    | predicted<br>(union)        | 185 | 153   | 0.040 |
| Gene Ontology -<br>Biological Process | hippo<br>signaling                                      | predicted<br>(union)        | 24  | 13.91 | 0.040 |
| Gene Ontology -<br>Biological Process | regulation of<br>cellular<br>component<br>movement      | predicted<br>(union)        | 375 | 329.1 | 0.040 |
| Gene Ontology -<br>Biological Process | muscle cell<br>proliferation                            | predicted<br>(intersection) | 55  | 36.48 | 0.042 |

|                                       |                                                          |                             |     |       |       |
|---------------------------------------|----------------------------------------------------------|-----------------------------|-----|-------|-------|
| Gene Ontology -<br>Biological Process | circadian<br>rhythm                                      | predicted<br>(union)        | 94  | 71.93 | 0.042 |
| Gene Ontology -<br>Biological Process | regulation of<br>cell motility                           | predicted<br>(union)        | 345 | 301.2 | 0.042 |
| Gene Ontology -<br>Biological Process | gene silencing                                           | predicted<br>(intersection) | 57  | 38.15 | 0.043 |
| Gene Ontology -<br>Biological Process | neuron<br>development                                    | predicted<br>(union)        | 399 | 352.1 | 0.043 |
| Gene Ontology -<br>Biological Process | polysaccharid<br>e metabolic<br>process                  | predicted<br>(union)        | 51  | 35.37 | 0.043 |
| Gene Ontology -<br>Biological Process | regulation of<br>transcription<br>initiation from<br>RNA | predicted<br>(union)        | 15  | 7.551 | 0.043 |
| Gene Ontology -<br>Biological Process | polymerase II<br>promoter                                | predicted<br>(union)        | 154 | 121.8 | 0.044 |
| Gene Ontology -<br>Biological Process | actin filament-<br>based process                         | predicted<br>(intersection) | 329 | 282   | 0.045 |
| Gene Ontology -<br>Biological Process | cell-cell<br>signaling                                   | predicted<br>(intersection) | 550 | 496   | 0.045 |
| Gene Ontology -<br>Biological Process | cell projection<br>organization                          | predicted<br>(union)        | 46  | 31.4  | 0.045 |
| Gene Ontology -<br>Biological Process | dendritic spine<br>development                           | predicted<br>(union)        | 238 | 202.3 | 0.045 |
| Gene Ontology -<br>Biological Process | embryonic<br>morphogenesis                               | predicted<br>(union)        | 180 | 149   | 0.045 |
| Gene Ontology -<br>Biological Process | glycerolipid<br>metabolic<br>process                     | predicted<br>(union)        | 334 | 291.7 | 0.045 |
| Gene Ontology -<br>Biological Process | hemopoiesis                                              | predicted<br>(union)        | 126 | 100.5 | 0.045 |
| Gene Ontology -<br>Biological Process | kidney<br>development                                    | predicted<br>(union)        | 491 | 439.9 | 0.045 |
| Gene Ontology -<br>Biological Process | neuron<br>differentiation                                | predicted<br>(union)        |     |       |       |

|                                       |                                                      |                             |     |       |       |
|---------------------------------------|------------------------------------------------------|-----------------------------|-----|-------|-------|
| Gene Ontology -<br>Biological Process | neuron<br>projection<br>development                  | predicted<br>(union)        | 352 | 308.4 | 0.045 |
| Gene Ontology -<br>Biological Process | phosphatidylin<br>ositol<br>phosphorylation          | predicted<br>(union)        | 47  | 32.19 | 0.045 |
| Gene Ontology -<br>Biological Process | regulation of<br>circadian<br>rhythm                 | predicted<br>(union)        | 57  | 40.54 | 0.045 |
| Gene Ontology -<br>Biological Process | regulation of<br>neuron<br>projection<br>development | predicted<br>(union)        | 190 | 158.2 | 0.045 |
| Gene Ontology -<br>Biological Process | renal system<br>development<br>trigeminal            | predicted<br>(union)        | 132 | 105.7 | 0.045 |
| Gene Ontology -<br>Biological Process | nerve<br>development                                 | predicted<br>(union)        | 10  | 4.372 | 0.045 |
| Gene Ontology -<br>Biological Process | RNA splicing<br>cellular<br>response to              | predicted<br>(union)        | 173 | 143.1 | 0.046 |
| Gene Ontology -<br>Biological Process | organic<br>substance                                 | predicted<br>(union)        | 950 | 881.1 | 0.046 |
| Gene Ontology -<br>Biological Process | histone<br>modification<br>positive                  | predicted<br>(union)        | 180 | 149.4 | 0.046 |
| Gene Ontology -<br>Biological Process | regulation of<br>dendrite<br>development             | predicted<br>(union)        | 36  | 23.45 | 0.046 |
| Gene Ontology -<br>Biological Process | regulation of<br>actin filament-<br>based process    | predicted<br>(union)        | 144 | 116.8 | 0.046 |
| Gene Ontology -<br>Biological Process | regulation of<br>developmental<br>growth             | predicted<br>(union)        | 132 | 106.1 | 0.046 |
| Gene Ontology -<br>Biological Process | regulation of<br>kinase activity                     | predicted<br>(union)        | 327 | 285.4 | 0.046 |
| Gene Ontology -<br>Biological Process | cell projection<br>morphogenesis                     | predicted<br>(intersection) | 136 | 106.1 | 0.047 |

|                                    |                                                         |                          |     |       |         |
|------------------------------------|---------------------------------------------------------|--------------------------|-----|-------|---------|
| Gene Ontology - Biological Process | glomerulus development                                  | predicted (intersection) | 22  | 11.32 | 0.047   |
| Gene Ontology - Biological Process | organelle organization                                  | predicted (intersection) | 691 | 625.8 | 0.047   |
| Gene Ontology - Biological Process | positive regulation of smooth muscle cell proliferation | predicted (intersection) | 29  | 16.35 | 0.047   |
| Gene Ontology - Biological Process | regulation of protein metabolic process                 | predicted (intersection) | 534 | 475.7 | 0.047   |
| Gene Ontology - Biological Process | sensory system development                              | predicted (union)        | 154 | 126   | 0.048   |
| Gene Ontology - Biological Process | glycoprotein biosynthetic process                       | predicted (intersection) | 79  | 56.81 | 0.049   |
| Gene Ontology - Biological Process | response to radiation                                   | predicted (intersection) | 109 | 82.6  | 0.049   |
| Gene Ontology - Biological Process | sig carbohydrate derivative                             | predicted (intersection) | 139 | 109   | 0.050   |
| Gene Ontology - Biological Process | metabolic process                                       | predicted (intersection) | 235 | 195.8 | 0.050   |
| Gene Ontology - Biological Process | homeostatic process                                     | predicted (union)        | 650 | 592.6 | 0.050   |
| Gene Ontology - Biological Process | peptidyl-serine phosphorylation                         | predicted (union)        | 105 | 82.27 | 0.050   |
| Gene Ontology - Cellular Component | nucleoplasm                                             | predicted (intersection) | 766 | 637.3 | 2.01e-7 |
| Gene Ontology - Cellular Component | chromosome                                              | predicted (union)        | 950 | 820.3 | 2.36e-7 |
| Gene Ontology - Cellular Component | nuclear chromatin                                       | predicted (union)        | 738 | 624   | 2.36e-7 |

|                                    |                                         |                          |     |       |         |
|------------------------------------|-----------------------------------------|--------------------------|-----|-------|---------|
| Gene Ontology - Cellular Component | chromatin                               | predicted (union)        | 787 | 671.3 | 3.01e-7 |
| Gene Ontology - Cellular Component | nuclear chromosome                      | predicted (union)        | 792 | 678   | 4.60e-7 |
| Gene Ontology - Cellular Component | chromatin                               | predicted (intersection) | 427 | 354.1 | 7.56e-4 |
| Gene Ontology - Cellular Component | early endosome                          | predicted (intersection) | 94  | 61.63 | 7.56e-4 |
| Gene Ontology - Cellular Component | nuclear chromatin                       | predicted (intersection) | 397 | 329.1 | 7.56e-4 |
| Gene Ontology - Cellular Component | postsynapse                             | predicted (intersection) | 154 | 111.1 | 7.56e-4 |
| Gene Ontology - Cellular Component | postsynaptic membrane                   | predicted (intersection) | 88  | 57.23 | 7.56e-4 |
| Gene Ontology - Cellular Component | synapse                                 | predicted (intersection) | 270 | 213.6 | 7.56e-4 |
| Gene Ontology - Cellular Component | synaptic membrane                       | predicted (intersection) | 112 | 75.89 | 7.56e-4 |
| Gene Ontology - Cellular Component | chromosome                              | predicted (intersection) | 505 | 432.7 | 0.002   |
| Gene Ontology - Cellular Component | postsynaptic specialization             | predicted (intersection) | 88  | 59.12 | 0.002   |
| Gene Ontology - Cellular Component | Golgi membrane                          | predicted (union)        | 301 | 249.2 | 0.002   |
| Gene Ontology - Cellular Component | integral component of synaptic membrane | predicted (intersection) | 49  | 28.72 | 0.003   |
| Gene Ontology - Cellular Component | nuclear chromosome                      | predicted (intersection) | 420 | 357.6 | 0.004   |
| Gene Ontology - Cellular Component | Golgi apparatus                         | predicted (intersection) | 326 | 271.7 | 0.005   |

|                                    |                                             |                          |     |       |       |
|------------------------------------|---------------------------------------------|--------------------------|-----|-------|-------|
| Gene Ontology - Cellular Component | guanyl-nucleotide exchange factor complex   | predicted (intersection) | 8   | 2.096 | 0.005 |
| Gene Ontology - Cellular Component | postsynaptic density                        | predicted (intersection) | 80  | 54.09 | 0.005 |
| Gene Ontology - Cellular Component | asymmetric synapse                          | predicted (intersection) | 80  | 54.92 | 0.007 |
| Gene Ontology - Cellular Component | cis-Golgi network                           | predicted (intersection) | 18  | 7.757 | 0.007 |
| Gene Ontology - Cellular Component | dendritic tree                              | predicted (intersection) | 127 | 95.18 | 0.008 |
| Gene Ontology - Cellular Component | nuclear body                                | predicted (union)        | 314 | 265.5 | 0.008 |
| Gene Ontology - Cellular Component | nuclear envelope                            | predicted (union)        | 184 | 147.4 | 0.008 |
| Gene Ontology - Cellular Component | dendrite                                    | predicted (intersection) | 126 | 94.76 | 0.009 |
| Gene Ontology - Cellular Component | glutamatergic synapse                       | predicted (intersection) | 92  | 66.46 | 0.013 |
| Gene Ontology - Cellular Component | intrinsic component of membrane             | predicted (intersection) | 938 | 860.8 | 0.013 |
| Gene Ontology - Cellular Component | integral component of postsynaptic membrane | predicted (intersection) | 37  | 22.01 | 0.016 |
| Gene Ontology - Cellular Component | endomembrane system                         | predicted (intersection) | 858 | 785.5 | 0.017 |
| Gene Ontology - Cellular Component | integral component of membrane              | predicted (intersection) | 907 | 832.7 | 0.017 |
| Gene Ontology - Cellular Component | Golgi apparatus                             | predicted (union)        | 577 | 515.1 | 0.017 |

|                                    |                                                      |                          |     |       |       |
|------------------------------------|------------------------------------------------------|--------------------------|-----|-------|-------|
| Gene Ontology - Cellular Component | Golgi membrane                                       | predicted (intersection) | 165 | 131.4 | 0.018 |
| Gene Ontology - Cellular Component | synapse                                              | predicted (union)        | 459 | 405   | 0.022 |
| Gene Ontology - Cellular Component | dendrite                                             | predicted (union)        | 215 | 179.6 | 0.024 |
| Gene Ontology - Cellular Component | dendritic tree                                       | predicted (union)        | 216 | 180.4 | 0.024 |
| Gene Ontology - Cellular Component | postsynapse                                          | predicted (union)        | 249 | 210.6 | 0.024 |
| Gene Ontology - Cellular Component | synaptic membrane                                    | predicted (union)        | 176 | 143.9 | 0.024 |
| Gene Ontology - Cellular Component | transcriptional repressor complex                    | predicted (union)        | 44  | 29.01 | 0.024 |
| Gene Ontology - Cellular Component | cell junction                                        | predicted (union)        | 485 | 432   | 0.025 |
| Gene Ontology - Cellular Component | presynaptic membrane                                 | predicted (intersection) | 42  | 26.62 | 0.027 |
| Gene Ontology - Cellular Component | cell junction                                        | predicted (intersection) | 269 | 227.9 | 0.028 |
| Gene Ontology - Cellular Component | postsynaptic density                                 | predicted (union)        | 129 | 102.5 | 0.028 |
| Gene Ontology - Cellular Component | postsynaptic specialization                          | predicted (union)        | 139 | 112.1 | 0.035 |
| Gene Ontology - Cellular Component | endoplasmic reticulum-Golgi intermediate compartment | predicted (intersection) | 35  | 21.8  | 0.043 |
| Gene Ontology - Cellular Component | host cell                                            | predicted (intersection) | 24  | 13.42 | 0.043 |

|                                    |                                                                       |                          |     |       |          |
|------------------------------------|-----------------------------------------------------------------------|--------------------------|-----|-------|----------|
| Gene Ontology - Cellular Component | nucleotide-activated protein kinase complex                           | predicted (intersection) | 5   | 1.258 | 0.047    |
| Gene Ontology - Cellular Component | mitotic spindle                                                       | predicted (intersection) | 29  | 17.4  | 0.049    |
| Gene Ontology - Cellular Component | nuclear envelope                                                      | predicted (intersection) | 101 | 77.78 | 0.049    |
| Gene Ontology - Molecular Function | DNA-binding transcription factor activity                             | predicted (union)        | 849 | 707.8 | 7.15e-10 |
| Gene Ontology - Molecular Function | DNA-binding transcription factor activity, RNA polymerase II-specific | predicted (union)        | 681 | 566.3 | 5.96e-8  |
| Gene Ontology - Molecular Function | purine nucleotide binding                                             | predicted (union)        | 748 | 639.5 | 2.09e-6  |
| Gene Ontology - Molecular Function | purine ribonucleotide binding                                         | predicted (union)        | 745 | 637.1 | 2.09e-6  |
| Gene Ontology - Molecular Function | nucleotide binding                                                    | predicted (union)        | 824 | 712.6 | 2.97e-6  |
| Gene Ontology - Molecular Function | purine ribonucleoside triphosphate binding                            | predicted (union)        | 715 | 611.6 | 3.19e-6  |
| Gene Ontology - Molecular Function | DNA binding                                                           | predicted (union)        | 889 | 776.6 | 5.16e-6  |
| Gene Ontology - Molecular Function | cation binding                                                        | predicted (intersection) | 881 | 763.3 | 2.98e-5  |
| Gene Ontology - Molecular Function | metal ion binding                                                     | predicted (intersection) | 872 | 752.4 | 2.98e-5  |
| Gene Ontology - Molecular Function | kinase activity                                                       | predicted (union)        | 546 | 463.8 | 4.95e-5  |



|                                          |                                                                                       |                             |     |       |         |
|------------------------------------------|---------------------------------------------------------------------------------------|-----------------------------|-----|-------|---------|
| Gene Ontology -<br>Molecular<br>Function | ATP binding                                                                           | predicted<br>(union)        | 595 | 511.1 | 7.00e-5 |
| Gene Ontology -<br>Molecular<br>Function | adenyl<br>nucleotide<br>binding                                                       | predicted<br>(union)        | 618 | 532.2 | 7.00e-5 |
| Gene Ontology -<br>Molecular<br>Function | carbohydrate<br>derivative<br>binding                                                 | predicted<br>(union)        | 842 | 743.2 | 7.00e-5 |
| Gene Ontology -<br>Molecular<br>Function | DNA-binding<br>transcription<br>factor activity                                       | predicted<br>(intersection) | 454 | 373.4 | 2.59e-4 |
| Gene Ontology -<br>Molecular<br>Function | enzyme<br>binding                                                                     | predicted<br>(union)        | 773 | 684   | 2.91e-4 |
| Gene Ontology -<br>Molecular<br>Function | phosphotransf<br>erase activity,<br>alcohol group<br>as acceptor<br>protein           | predicted<br>(union)        | 499 | 426.8 | 2.91e-4 |
| Gene Ontology -<br>Molecular<br>Function | serine/threoni<br>ne kinase<br>activity                                               | predicted<br>(union)        | 328 | 270.2 | 3.21e-4 |
| Gene Ontology -<br>Molecular<br>Function | enzyme<br>binding                                                                     | predicted<br>(intersection) | 438 | 360.8 | 3.80e-4 |
| Gene Ontology -<br>Molecular<br>Function | protein kinase<br>activity                                                            | predicted<br>(union)        | 458 | 390.7 | 4.17e-4 |
| Gene Ontology -<br>Molecular<br>Function | small<br>molecule<br>binding                                                          | predicted<br>(union)        | 923 | 828.6 | 4.17e-4 |
| Gene Ontology -<br>Molecular<br>Function | DNA-binding<br>transcription<br>factor activity,<br>RNA<br>polymerase II-<br>specific | predicted<br>(intersection) | 365 | 298.7 | 0.001   |
| Gene Ontology -<br>Molecular<br>Function | kinase activity                                                                       | predicted<br>(intersection) | 306 | 244.6 | 0.001   |
| Gene Ontology -<br>Molecular<br>Function | double-<br>stranded DNA<br>binding                                                    | predicted<br>(union)        | 319 | 265.5 | 0.001   |

|                                          |                                                                                                      |                             |     |       |       |
|------------------------------------------|------------------------------------------------------------------------------------------------------|-----------------------------|-----|-------|-------|
| Gene Ontology -<br>Molecular<br>Function | drug binding<br>phosphoric<br>ester<br>hydrolase<br>activity                                         | predicted<br>(union)        | 658 | 583   | 0.001 |
| Gene Ontology -<br>Molecular<br>Function | sequence-<br>specific DNA<br>binding                                                                 | predicted<br>(union)        | 384 | 326.3 | 0.001 |
| Gene Ontology -<br>Molecular<br>Function | carbohydrate<br>derivative<br>binding                                                                | predicted<br>(intersection) | 462 | 392   | 0.002 |
| Gene Ontology -<br>Molecular<br>Function | nucleotide<br>binding                                                                                | predicted<br>(intersection) | 445 | 375.9 | 0.002 |
| Gene Ontology -<br>Molecular<br>Function | protein kinase<br>activity                                                                           | predicted<br>(intersection) | 261 | 206.1 | 0.002 |
| Gene Ontology -<br>Molecular<br>Function | purine<br>nucleotide<br>binding                                                                      | predicted<br>(intersection) | 403 | 337.3 | 0.002 |
| Gene Ontology -<br>Molecular<br>Function | purine<br>ribonucleotide<br>binding                                                                  | predicted<br>(intersection) | 402 | 336   | 0.002 |
| Gene Ontology -<br>Molecular<br>Function | transferase<br>activity<br>RNA<br>polymerase II<br>proximal<br>promoter                              | predicted<br>(intersection) | 559 | 483.2 | 0.002 |
| Gene Ontology -<br>Molecular<br>Function | sequence-<br>specific DNA<br>binding                                                                 | predicted<br>(union)        | 193 | 153.4 | 0.002 |
| Gene Ontology -<br>Molecular<br>Function | sequence-<br>specific<br>double-<br>stranded DNA<br>binding<br>transcription<br>regulatory<br>region | predicted<br>(union)        | 290 | 241.2 | 0.002 |
| Gene Ontology -<br>Molecular<br>Function | sequence-<br>specific DNA<br>binding                                                                 | predicted<br>(union)        | 276 | 228.9 | 0.002 |

|                                          |                                                                                      |                             |     |       |       |
|------------------------------------------|--------------------------------------------------------------------------------------|-----------------------------|-----|-------|-------|
| Gene Ontology -<br>Molecular<br>Function | nucleic acid<br>binding                                                              | predicted<br>(intersection) | 759 | 674   | 0.003 |
| Gene Ontology -<br>Molecular<br>Function | phosphoric<br>ester<br>hydrolase<br>activity                                         | predicted<br>(intersection) | 132 | 96.22 | 0.003 |
| Gene Ontology -<br>Molecular<br>Function | phosphotransf<br>erase activity,<br>alcohol group<br>as acceptor                     | predicted<br>(intersection) | 278 | 225.2 | 0.003 |
| Gene Ontology -<br>Molecular<br>Function | RNA<br>polymerase II<br>regulatory<br>region DNA<br>binding                          | predicted<br>(union)        | 257 | 212.6 | 0.003 |
| Gene Ontology -<br>Molecular<br>Function | RNA<br>polymerase II<br>regulatory<br>region<br>sequence-<br>specific DNA<br>binding | predicted<br>(union)        | 257 | 212.2 | 0.003 |
| Gene Ontology -<br>Molecular<br>Function | transcription<br>regulatory<br>region DNA<br>binding                                 | predicted<br>(union)        | 318 | 268.7 | 0.003 |
| Gene Ontology -<br>Molecular<br>Function | DNA binding                                                                          | predicted<br>(intersection) | 477 | 409.6 | 0.004 |
| Gene Ontology -<br>Molecular<br>Function | purine<br>ribonucleoside<br>triphosphate<br>binding                                  | predicted<br>(intersection) | 383 | 322.6 | 0.004 |
| Gene Ontology -<br>Molecular<br>Function | ubiquitin-like<br>protein<br>transferase<br>activity                                 | predicted<br>(union)        | 162 | 128.4 | 0.005 |
| Gene Ontology -<br>Molecular<br>Function | RNA<br>polymerase II<br>proximal<br>promoter<br>sequence-<br>specific DNA<br>binding | predicted<br>(intersection) | 112 | 80.92 | 0.006 |

|                                    |                                                                          |                          |     |       |       |
|------------------------------------|--------------------------------------------------------------------------|--------------------------|-----|-------|-------|
| Gene Ontology - Molecular Function | proximal promoter sequence-specific DNA binding                          | predicted (union)        | 196 | 159.4 | 0.006 |
| Gene Ontology - Molecular Function | histone acetyltransferase binding                                        | predicted (intersection) | 14  | 5.241 | 0.008 |
| Gene Ontology - Molecular Function | transcription coregulator activity                                       | predicted (intersection) | 129 | 96.22 | 0.008 |
| Gene Ontology - Molecular Function | proximal promoter sequence-specific DNA binding                          | predicted (intersection) | 114 | 84.06 | 0.011 |
| Gene Ontology - Molecular Function | protein serine/threonine kinase activity                                 | predicted (intersection) | 180 | 142.6 | 0.014 |
| Gene Ontology - Molecular Function | transcription regulatory region DNA binding                              | predicted (intersection) | 179 | 141.7 | 0.014 |
| Gene Ontology - Molecular Function | protein phosphatase 1 binding                                            | predicted (union)        | 13  | 5.961 | 0.014 |
| Gene Ontology - Molecular Function | phosphatase activity                                                     | predicted (union)        | 169 | 137.1 | 0.015 |
| Gene Ontology - Molecular Function | histone binding                                                          | predicted (intersection) | 51  | 32.49 | 0.016 |
| Gene Ontology - Molecular Function | adenyl nucleotide binding                                                | predicted (intersection) | 330 | 280.7 | 0.017 |
| Gene Ontology - Molecular Function | kinase binding                                                           | predicted (intersection) | 156 | 122.2 | 0.017 |
| Gene Ontology - Molecular Function | DNA-binding transcription activator activity, RNA polymerase II-specific | predicted (union)        | 173 | 141.1 | 0.017 |

|                                          |                                                                                      |                             |     |       |       |
|------------------------------------------|--------------------------------------------------------------------------------------|-----------------------------|-----|-------|-------|
| Gene Ontology -<br>Molecular<br>Function | ubiquitin-<br>protein<br>transferase<br>activity                                     | predicted<br>(union)        | 148 | 118.8 | 0.018 |
| Gene Ontology -<br>Molecular<br>Function | hydrolase<br>activity, acting<br>on ester<br>bonds                                   | predicted<br>(union)        | 354 | 308.8 | 0.021 |
| Gene Ontology -<br>Molecular<br>Function | small<br>molecule<br>binding                                                         | predicted<br>(intersection) | 495 | 437.1 | 0.024 |
| Gene Ontology -<br>Molecular<br>Function | RNA<br>polymerase II<br>regulatory<br>region DNA<br>binding                          | predicted<br>(intersection) | 143 | 112.2 | 0.025 |
| Gene Ontology -<br>Molecular<br>Function | RNA<br>polymerase II<br>regulatory<br>region<br>sequence-<br>specific DNA<br>binding | predicted<br>(intersection) | 143 | 111.9 | 0.025 |
| Gene Ontology -<br>Molecular<br>Function | SMAD binding                                                                         | predicted<br>(intersection) | 25  | 13.42 | 0.025 |
| Gene Ontology -<br>Molecular<br>Function | phosphoric<br>diester<br>hydrolase<br>activity                                       | predicted<br>(intersection) | 40  | 24.53 | 0.025 |
| Gene Ontology -<br>Molecular<br>Function | protein<br>serine/threoni<br>ne/tyrosine<br>kinase activity                          | predicted<br>(intersection) | 32  | 18.45 | 0.025 |
| Gene Ontology -<br>Molecular<br>Function | transcription<br>coactivator<br>activity                                             | predicted<br>(intersection) | 79  | 56.6  | 0.025 |
| Gene Ontology -<br>Molecular<br>Function | transcription<br>coregulator<br>activity                                             | predicted<br>(union)        | 217 | 182.4 | 0.025 |
| Gene Ontology -<br>Molecular<br>Function | ATP binding                                                                          | predicted<br>(intersection) | 315 | 269.6 | 0.028 |
| Gene Ontology -<br>Molecular<br>Function | ubiquitin<br>conjugating<br>enzyme<br>binding                                        | predicted<br>(union)        | 10  | 4.372 | 0.031 |

|                                    |                                                      |                          |     |       |       |
|------------------------------------|------------------------------------------------------|--------------------------|-----|-------|-------|
| Gene Ontology - Molecular Function | protein domain specific binding                      | predicted (union)        | 274 | 236.1 | 0.033 |
| Gene Ontology - Molecular Function | DNA binding, bending transcription regulatory region | predicted (union)        | 13  | 6.359 | 0.038 |
| Gene Ontology - Molecular Function | sequence-specific DNA binding                        | predicted (intersection) | 151 | 120.8 | 0.041 |
| Gene Ontology - Molecular Function | ubiquitin protein ligase activity                    | predicted (union)        | 74  | 55.64 | 0.046 |
| Gene Ontology - Molecular Function | enhancer binding                                     | predicted (union)        | 52  | 36.96 | 0.047 |
| KEGG                               | Endometrial cancer                                   | experimental (any)       | 4   | 0.284 | 0.012 |
| KEGG                               | Chronic myeloid leukemia                             | experimental (strong)    | 2   | 0.139 | 0.021 |
| KEGG                               | ErbB signaling pathway                               | experimental (strong)    | 2   | 0.139 | 0.021 |
| KEGG                               | HIF-1 signaling pathway                              | experimental (strong)    | 2   | 0.157 | 0.021 |
| KEGG                               | Measles                                              | experimental (strong)    | 2   | 0.175 | 0.021 |
| KEGG                               | Prostate cancer                                      | experimental (strong)    | 2   | 0.162 | 0.021 |
| KEGG                               | Small cell lung cancer                               | experimental (strong)    | 2   | 0.139 | 0.021 |
| KEGG                               | Epstein-Barr virus infection                         | experimental (strong)    | 2   | 0.201 | 0.022 |
| KEGG                               | FoxO signaling pathway                               | experimental (strong)    | 2   | 0.208 | 0.022 |
| KEGG                               | Circadian rhythm                                     | predicted (union)        | 20  | 10.73 | 0.024 |

|          |                                         |                          |     |       |         |
|----------|-----------------------------------------|--------------------------|-----|-------|---------|
| KEGG     | FoxO signaling pathway                  | predicted (union)        | 66  | 46.5  | 0.024   |
| KEGG     | Proteoglycans in cancer                 | predicted (union)        | 104 | 79.88 | 0.024   |
| KEGG     | Renal cell carcinoma                    | predicted (union)        | 36  | 22.65 | 0.024   |
| KEGG     | Hepatitis B                             | experimental (strong)    | 2   | 0.237 | 0.025   |
| KEGG     | Colorectal cancer                       | predicted (union)        | 35  | 22.26 | 0.026   |
| KEGG     | Ubiquitin mediated proteolysis          | predicted (union)        | 69  | 50.87 | 0.036   |
| KEGG     | MAPK signaling pathway                  | predicted (union)        | 115 | 91.41 | 0.038   |
| KEGG     | mTOR signaling pathway                  | predicted (union)        | 33  | 21.46 | 0.041   |
| KEGG     | Transcriptional misregulation in cancer | predicted (union)        | 82  | 63.19 | 0.048   |
| Reactome | Gene expression (Transcription)         | predicted (union)        | 639 | 517   | 1.12e-9 |
| Reactome | RNA Polymerase II Transcription         | predicted (union)        | 571 | 465.8 | 5.91e-8 |
| Reactome | Gene expression (Transcription)         | predicted (intersection) | 358 | 272.7 | 4.01e-6 |
| Reactome | Generic Transcription Pathway           | predicted (union)        | 508 | 420.5 | 6.29e-6 |
| Reactome | RNA Polymerase II Transcription         | predicted (intersection) | 323 | 245.7 | 1.09e-5 |
| Reactome | Generic Transcription Pathway           | predicted (intersection) | 289 | 221.8 | 1.06e-4 |

|          |                                                                        |                          |     |       |         |
|----------|------------------------------------------------------------------------|--------------------------|-----|-------|---------|
| Reactome | Diseases of signal transduction                                        | predicted (union)        | 185 | 138.7 | 1.24e-4 |
| Reactome | Intracellular signaling by second messengers                           | predicted (union)        | 147 | 109.7 | 0.001   |
| Reactome | AKT phosphorylates targets in the cytosol                              | experimental (strong)    | 2   | 0.020 | 0.004   |
| Reactome | Constitutive Signaling by AKT1 E17K in Cancer                          | experimental (strong)    | 2   | 0.040 | 0.006   |
| Reactome | Estrogen-dependent nuclear events downstream of ESR-membrane signaling | experimental (strong)    | 2   | 0.042 | 0.006   |
| Reactome | PIP3 activates AKT signaling                                           | predicted (union)        | 126 | 94.98 | 0.009   |
| Reactome | Cell Cycle, Mitotic                                                    | experimental (strong)    | 3   | 0.294 | 0.009   |
| Reactome | Cyclin A:Cdk2-associated events at S phase entry                       | experimental (strong)    | 2   | 0.064 | 0.009   |
| Reactome | Cyclin E associated events during G1/S transition                      | experimental (strong)    | 2   | 0.062 | 0.009   |
| Reactome | Neuronal System                                                        | predicted (intersection) | 106 | 73.79 | 0.010   |
| Reactome | Cell Cycle                                                             | experimental (strong)    | 3   | 0.343 | 0.011   |



|          |                                               |                       |    |       |       |
|----------|-----------------------------------------------|-----------------------|----|-------|-------|
| Reactome | Extra-nuclear estrogen signaling              | experimental (strong) | 2  | 0.102 | 0.011 |
| Reactome | FOXO-mediated transcription                   | experimental (strong) | 2  | 0.104 | 0.011 |
| Reactome | G1/S Transition                               | experimental (strong) | 2  | 0.106 | 0.011 |
| Reactome | S Phase                                       | experimental (strong) | 2  | 0.108 | 0.011 |
| Reactome | Cell Cycle Checkpoints                        | experimental (strong) | 2  | 0.137 | 0.016 |
| Reactome | Mitotic G1-G1/S phases                        | experimental (strong) | 2  | 0.142 | 0.016 |
| Reactome | PI3K/AKT Signaling in Cancer                  | experimental (strong) | 2  | 0.150 | 0.016 |
| Reactome | Signal Transduction                           | experimental (strong) | 5  | 1.708 | 0.016 |
| Reactome | Activation of AKT2                            | experimental (any)    | 2  | 0.023 | 0.020 |
| Reactome | Constitutive Signaling by AKT1 E17K in Cancer | experimental (any)    | 3  | 0.148 | 0.020 |
| Reactome | VEGFR2 mediated vascular permeability         | experimental (any)    | 3  | 0.153 | 0.020 |
| Reactome | SUMOylation                                   | predicted (union)     | 87 | 63.19 | 0.022 |
| Reactome | RHO GTPase Effectors                          | experimental (strong) | 2  | 0.192 | 0.024 |
| Reactome | Signaling by BRAF and RAF fusions             | predicted (union)     | 39 | 24.24 | 0.025 |
| Reactome | ESR-mediated signaling                        | experimental (strong) | 2  | 0.208 | 0.026 |

|          |                                                                                                   |                       |    |       |       |
|----------|---------------------------------------------------------------------------------------------------|-----------------------|----|-------|-------|
| Reactome | Ligand-receptor interactions                                                                      | experimental (any)    | 2  | 0.045 | 0.028 |
| Reactome | Signaling by Nuclear Receptors                                                                    | experimental (strong) | 2  | 0.232 | 0.030 |
| Reactome | Signaling by Rho GTPases                                                                          | experimental (strong) | 2  | 0.248 | 0.032 |
| Reactome | Negative regulation of the PI3K/AKT network<br>PI5P, PP2A and IER3<br>Regulate PI3K/AKT Signaling | predicted (union)     | 59 | 40.93 | 0.038 |
| Reactome | Regulation of cholesterol biosynthesis by SREBP (SREBF)                                           | predicted (union)     | 56 | 38.55 | 0.038 |
| Reactome | SUMO E3 ligases<br>SUMOylate target proteins                                                      | predicted (union)     | 32 | 19.47 | 0.038 |
| Reactome | Disease                                                                                           | experimental (strong) | 83 | 61.2  | 0.038 |
| Reactome | PIP3 activates AKT signaling                                                                      | experimental (strong) | 3  | 0.739 | 0.038 |
| Reactome | Constitutive Signaling by Aberrant PI3K in Cancer                                                 | experimental (strong) | 2  | 0.294 | 0.040 |
| Reactome | Transcriptional Regulation by TP53                                                                | predicted (union)     | 43 | 28.22 | 0.041 |
| Reactome | Generic Transcription Pathway                                                                     | experimental (strong) | 2  | 0.303 | 0.041 |
| Reactome |                                                                                                   | experimental (strong) | 3  | 0.838 | 0.044 |

|              |                                                            |                          |    |       |         |
|--------------|------------------------------------------------------------|--------------------------|----|-------|---------|
| Reactome     | Intracellular signaling by second messengers               | experimental (strong)    | 2  | 0.325 | 0.044   |
| Reactome     | RNA Polymerase II Transcription                            | experimental (strong)    | 3  | 0.858 | 0.045   |
| WikiPathways | MECP2 and Associated Rett Syndrome Pathways Regulating     | predicted (intersection) | 28 | 11.74 | 5.86e-4 |
| WikiPathways | Hippo Signaling                                            | predicted (union)        | 54 | 34.97 | 0.016   |
| WikiPathways | Brain-Derived Neurotrophic Factor (BDNF) signaling pathway | predicted (union)        | 74 | 52.06 | 0.017   |
| WikiPathways | Hippo-Merlin Signaling Dysregulation                       | predicted (union)        | 61 | 41.73 | 0.017   |
| WikiPathways | Endometrial cancer                                         | experimental (any)       | 4  | 0.346 | 0.020   |
| WikiPathways | Aryl Hydrocarbon Receptor                                  | experimental (any)       | 3  | 0.250 | 0.021   |
| WikiPathways | Integrated Cancer Pathway                                  | experimental (any)       | 3  | 0.244 | 0.021   |
| WikiPathways | Integrin-mediated Cell Adhesion                            | experimental (any)       | 4  | 0.511 | 0.021   |
| WikiPathways | Vitamin D Receptor Pathway                                 | experimental (any)       | 5  | 0.874 | 0.021   |
| WikiPathways | Energy Metabolism                                          | predicted (union)        | 29 | 17.49 | 0.024   |

|              |                                                                                |                          |    |       |       |
|--------------|--------------------------------------------------------------------------------|--------------------------|----|-------|-------|
| WikiPathways | Epithelial to mesenchymal transition in colorectal cancer                      | predicted (union)        | 79 | 57.63 | 0.024 |
| WikiPathways | Factors and pathways affecting insulin-like growth factor (IGF1)-Akt signaling | predicted (union)        | 20 | 10.73 | 0.024 |
| WikiPathways | Sterol Regulatory Element-Binding Proteins (SREBP) signalling                  | predicted (union)        | 39 | 25.04 | 0.024 |
| WikiPathways | Synaptic signaling pathways associated with autism spectrum disorder           | predicted (union)        | 29 | 17.49 | 0.024 |
| WikiPathways | ErbB Signaling Pathway                                                         | experimental (strong)    | 2  | 0.150 | 0.024 |
| WikiPathways | Signaling Pathways in Glioblastoma                                             | experimental (strong)    | 2  | 0.159 | 0.024 |
| WikiPathways | MECP2 and Associated Rett Syndrome                                             | predicted (union)        | 35 | 22.26 | 0.025 |
| WikiPathways | DNA Damage Response (only ATM dependent)                                       | experimental (strong)    | 2  | 0.204 | 0.026 |
| WikiPathways | Human Thyroid Stimulating Hormone (TSH) signaling pathway                      | predicted (intersection) | 25 | 12.37 | 0.029 |

|              |                                                                                                      |                             |    |       |       |
|--------------|------------------------------------------------------------------------------------------------------|-----------------------------|----|-------|-------|
| WikiPathways | Pathways<br>Regulating Hippo<br>Signaling TGF-beta                                                   | predicted<br>(intersection) | 33 | 18.45 | 0.029 |
| WikiPathways | Signaling<br>Pathway                                                                                 | predicted<br>(intersection) | 41 | 24.32 | 0.029 |
| WikiPathways | Human<br>Thyroid<br>Stimulating<br>Hormone<br>(TSH)<br>signaling<br>pathway                          | predicted<br>(union)        | 36 | 23.45 | 0.031 |
| WikiPathways | Leptin<br>signaling<br>pathway                                                                       | predicted<br>(union)        | 40 | 26.63 | 0.031 |
| WikiPathways | Prolactin<br>Signaling<br>Pathway                                                                    | predicted<br>(union)        | 41 | 27.42 | 0.031 |
| WikiPathways | Chromosomal<br>and<br>microsatellite<br>instability in<br>colorectal<br>cancer                       | predicted<br>(union)        | 40 | 27.02 | 0.032 |
| WikiPathways | Endoderm<br>Differentiation                                                                          | predicted<br>(union)        | 67 | 49.68 | 0.032 |
| WikiPathways | Endometrial<br>cancer                                                                                | predicted<br>(union)        | 34 | 22.26 | 0.032 |
| WikiPathways | IL-1 signaling<br>pathway                                                                            | predicted<br>(union)        | 30 | 19.08 | 0.032 |
| WikiPathways | Interleukin-11<br>Signaling<br>Pathway                                                               | predicted<br>(union)        | 26 | 15.9  | 0.032 |
| WikiPathways | TGF-beta<br>Signaling<br>Pathway                                                                     | predicted<br>(union)        | 63 | 46.1  | 0.032 |
| WikiPathways | Association<br>Between<br>Physico-<br>Chemical<br>Features and<br>Toxicity<br>Associated<br>Pathways | experiment<br>al (any)      | 3  | 0.352 | 0.035 |

|              |                                                                 |                    |     |       |       |
|--------------|-----------------------------------------------------------------|--------------------|-----|-------|-------|
| WikiPathways | Human Thyroid Stimulating Hormone (TSH) signaling pathway       | experimental (any) | 3   | 0.369 | 0.035 |
| WikiPathways | Imatinib and Chronic Myeloid Leukemia                           | experimental (any) | 2   | 0.114 | 0.035 |
| WikiPathways | miRNAs involved in DNA damage response                          | experimental (any) | 2   | 0.096 | 0.035 |
| WikiPathways | Prion disease pathway                                           | predicted (union)  | 21  | 12.32 | 0.038 |
| WikiPathways | Chromosomal and microsatellite instability in colorectal cancer | experimental (any) | 3   | 0.409 | 0.038 |
| WikiPathways | IL-7 Signaling Pathway                                          | experimental (any) | 2   | 0.136 | 0.038 |
| WikiPathways | ErbB Signaling Pathway                                          | predicted (union)  | 45  | 31.79 | 0.042 |
| WikiPathways | MAPK Signaling Pathway                                          | predicted (union)  | 109 | 87.43 | 0.042 |
| WikiPathways | Oncostatin M Signaling Pathway                                  | predicted (union)  | 36  | 24.24 | 0.042 |
| WikiPathways | Phosphodiesterases in neuronal function                         | predicted (union)  | 29  | 18.68 | 0.042 |
| WikiPathways | Signaling Pathways in Glioblastoma                              | predicted (union)  | 41  | 28.61 | 0.046 |
| WikiPathways | Signaling Pathways in Glioblastoma                              | experimental (any) | 3   | 0.454 | 0.046 |

|              |                                     |                          |   |       |       |
|--------------|-------------------------------------|--------------------------|---|-------|-------|
| WikiPathways | Sleep regulation                    | experimental (any)       | 2 | 0.165 | 0.047 |
| WikiPathways | ERK Pathway in Huntington's Disease | predicted (intersection) | 9 | 2.935 | 0.048 |

**Supplementary Table 1a**

| <b>Database</b>        | <b>Pathway</b>           | <b>Evidence</b>    | <b>Hits</b> | <b>Expected hits</b> | <b>P-value</b> |
|------------------------|--------------------------|--------------------|-------------|----------------------|----------------|
| Ontology - response    | Biological               | experimental (any) | 51          | 12                   | 6.63e-16       |
| Ontology - mediated    | Biological               | experimental (any) | 42          | 8.304                | 1.67e-15       |
| Ontology - to          | Biological               | experimental (any) | 51          | 12.88                | 4.51e-15       |
| Ontology - defense     | Biological               | experimental (any) | 50          | 16.09                | 8.70e-11       |
| Ontology - to external | Biological               | experimental (any) | 47          | 14.39                | 8.70e-11       |
| Ontology - to other    | Biological               | experimental (any) | 47          | 14.38                | 8.70e-11       |
| Ontology - response    | Biological               | experimental (any) | 69          | 28.82                | 1.88e-10       |
| Ontology - immune      | Biological               | experimental (any) | 57          | 20.93                | 1.88e-10       |
| Ontology - system      | Biological               | experimental (any) | 72          | 31.03                | 1.88e-10       |
| Ontology - immune      | Biological               | experimental (any) | 35          | 9.221                | 1.65e-9        |
| Ontology - response    | Biological               | experimental (any) | 13          | 0.983                | 2.31e-9        |
| Ontology - to organic  | Biological               | experimental (any) | 75          | 35.2                 | 2.31e-9        |
| Ontology - interferon  | Biological               | experimental (any) | 13          | 0.983                | 2.31e-9        |
| Ontology - of gene     | Biological               | (intersection)     | 821         | 670.6                | 3.32e-9        |
| Ontology - to type I   | Biological               | experimental (any) | 13          | 1.023                | 3.64e-9        |
| Ontology - apoptotic   | Biological               | experimental (any) | 55          | 21.68                | 5.11e-9        |
| Gene                   | Ontology - surface       | receptor           |             |                      |                |
| Process                | Biological               | experimental (any) | 69          | 31.41                | 5.11e-9        |
| Gene                   | Ontology - intracellular | signal             |             |                      |                |
| Process                | Biological               | experimental (any) | 37          | 10.95                | 6.62e-9        |



|            |                     |             |     |       |         |
|------------|---------------------|-------------|-----|-------|---------|
| Gene       | positive regulation |             |     |       |         |
| Ontology - | of cellular         |             |     |       |         |
| Biological | metabolic           | experimen   |     |       |         |
| Process    | process             | tal (any)   | 73  | 34.83 | 7.28e-9 |
| Gene       | positive regulation |             |     |       |         |
| Ontology - | of signal           |             |     |       |         |
| Biological | transducti          | experimen   |     |       |         |
| Process    | on                  | tal (any)   | 49  | 18.12 | 7.28e-9 |
| Gene       |                     |             |     |       |         |
| Ontology - |                     |             |     |       |         |
| Biological | response            | experimen   |     |       |         |
| Process    | to virus            | tal (any)   | 21  | 3.561 | 7.28e-9 |
| Gene       |                     |             |     |       |         |
| Ontology - |                     |             |     |       |         |
| Biological |                     | experimen   |     |       |         |
| Process    | cell death          | tal (any)   | 58  | 24.22 | 9.49e-9 |
| Gene       | cellular            |             |     |       |         |
| Ontology - | response            |             |     |       |         |
| Biological | to                  |             |     |       |         |
| Process    | lipopolysa          | experimen   |     |       |         |
|            | ccharide            | tal (any)   | 16  | 2.006 | 1.61e-8 |
| Gene       |                     |             |     |       |         |
| Ontology - | programm            |             |     |       |         |
| Biological | ed cell             | experimen   |     |       |         |
| Process    | death               | tal (any)   | 55  | 22.71 | 2.07e-8 |
| Gene       | cellular            |             |     |       |         |
| Ontology - | response            |             |     |       |         |
| Biological | to                  |             |     |       |         |
| Process    | molecule            |             |     |       |         |
| Gene       |                     |             |     |       |         |
| Ontology - | of                  |             |     |       |         |
| Biological | bacterial           | experimen   |     |       |         |
| Process    | origin              | tal (any)   | 16  | 2.099 | 2.91e-8 |
| Gene       |                     |             |     |       |         |
| Ontology - | gene                | predicted   |     |       |         |
| Biological | expressio           | (intersecti |     |       |         |
| Process    | n                   | on)         | 947 | 798.2 | 3.88e-8 |

|                                             |                                                                          |                                 |     |       |         |
|---------------------------------------------|--------------------------------------------------------------------------|---------------------------------|-----|-------|---------|
| Gene<br>Ontology -<br>Biological<br>Process | positive<br>regulation<br>of cellular<br>protein<br>metabolic<br>process | experimen<br>tal (any)          | 45  | 16.69 | 4.69e-8 |
| Gene<br>Ontology -<br>Biological<br>Process | regulation<br>of<br>intracellul<br>ar signal<br>transducti<br>on         | experimen<br>tal (any)          | 50  | 19.96 | 4.98e-8 |
| Gene<br>Ontology -<br>Biological<br>Process | regulation<br>of RNA<br>metabolic<br>process                             | predicted<br>(intersecti<br>on) | 703 | 572   | 5.32e-8 |
| Gene<br>Ontology -<br>Biological<br>Process | positive<br>regulation<br>of protein<br>modificati<br>on                 | experimen<br>tal (any)          | 38  | 12.69 | 7.11e-8 |
| Gene<br>Ontology -<br>Biological<br>Process | regulation<br>of cell<br>death                                           | experimen<br>tal (any)          | 48  | 18.92 | 7.46e-8 |
| Gene<br>Ontology -<br>Biological<br>Process | response<br>to<br>lipopolysa<br>ccharide                                 | experimen<br>tal (any)          | 19  | 3.348 | 8.07e-8 |
| Gene<br>Ontology -<br>Biological<br>Process | cellular<br>macromol<br>ecule<br>biosynthes<br>is process                | predicted<br>(intersecti<br>on) | 873 | 733.6 | 1.05e-7 |
| Gene<br>Ontology -<br>Biological<br>Process | positive<br>regulation<br>of<br>metabolic<br>process                     | experimen<br>tal (any)          | 74  | 38.04 | 1.14e-7 |

|            |              |           |    |       |         |
|------------|--------------|-----------|----|-------|---------|
| Gene       |              |           |    |       |         |
| Ontology - | regulation   |           |    |       |         |
| Biological | of cell      | experimen |    |       |         |
| Process    | adhesion     | tal (any) | 28 | 7.534 | 1.35e-7 |
|            | positive     |           |    |       |         |
| Gene       | regulation   |           |    |       |         |
| Ontology - | of           |           |    |       |         |
| Biological | phosphory    | experimen |    |       |         |
| Process    | lation       | tal (any) | 34 | 10.76 | 1.38e-7 |
|            | positive     |           |    |       |         |
| Gene       | regulation   |           |    |       |         |
| Ontology - | of protein   |           |    |       |         |
| Biological | phosphory    | experimen |    |       |         |
| Process    | lation       | tal (any) | 33 | 10.22 | 1.39e-7 |
|            | response     |           |    |       |         |
|            | to           |           |    |       |         |
| Gene       | molecule     |           |    |       |         |
| Ontology - | of           |           |    |       |         |
| Biological | bacterial    | experimen |    |       |         |
| Process    | origin       | tal (any) | 19 | 3.494 | 1.41e-7 |
| Gene       | intracellul  |           |    |       |         |
| Ontology - | ar signal    |           |    |       |         |
| Biological | transducti   | experimen |    |       |         |
| Process    | on           | tal (any) | 61 | 28.59 | 1.66e-7 |
|            | leukocyte    |           |    |       |         |
|            | adhesion     |           |    |       |         |
| Gene       | to           |           |    |       |         |
| Ontology - | vascular     |           |    |       |         |
| Biological | endothelia   | experimen |    |       |         |
| Process    | l cell       | tal (any) | 8  | 0.385 | 1.71e-7 |
|            | positive     |           |    |       |         |
| Gene       | regulation   |           |    |       |         |
| Ontology - | of protein   |           |    |       |         |
| Biological | metabolic    | experimen |    |       |         |
| Process    | process      | tal (any) | 45 | 17.66 | 1.89e-7 |
|            | regulation   |           |    |       |         |
| Gene       | of cell      |           |    |       |         |
| Ontology - | population   |           |    |       |         |
| Biological | proliferatio | experimen |    |       |         |
| Process    | n            | tal (any) | 45 | 17.67 | 1.89e-7 |

|      |                                                                        |                          |     |       |         |
|------|------------------------------------------------------------------------|--------------------------|-----|-------|---------|
| Gene | positive regulation of leukocyte cell-cell adhesion                    | experimental (any)       | 16  | 2.471 | 1.99e-7 |
| Gene | positive regulation of NF-kappaB transcription factor activity         | experimental (any)       | 14  | 1.82  | 2.06e-7 |
| Gene | positive regulation of cell adhesion                                   | experimental (any)       | 21  | 4.531 | 2.84e-7 |
| Gene | regulation of immune system process                                    | experimental (any)       | 42  | 16.1  | 3.23e-7 |
| Gene | positive regulation of cell-cell adhesion                              | experimental (any)       | 17  | 2.963 | 3.62e-7 |
| Gene | positive regulation of leukocyte adhesion to vascular endothelial cell | experimental (any)       | 6   | 0.173 | 3.97e-7 |
| Gene | lipopolysaccharide-mediated signaling pathway                          | experimental (any)       | 9   | 0.638 | 5.53e-7 |
| Gene | RNA biosynthetic process                                               | predicted (intersection) | 686 | 566.7 | 6.21e-7 |

|                               |                                                      |                |     |       |         |
|-------------------------------|------------------------------------------------------|----------------|-----|-------|---------|
| Gene                          | nucleobase-containing                                |                |     |       |         |
| Ontology - Biological Process | compound predicted metabolic process                 | (intersection) | 986 | 849.2 | 6.21e-7 |
| Gene                          | regulation of transcription by RNA polymerase II     |                |     |       |         |
| Ontology - Biological Process | predicted (intersection)                             |                | 512 | 406.5 | 6.21e-7 |
| Gene                          | regulation of transcription by RNA polymerase II     |                |     |       |         |
| Ontology - Biological Process | predicted (intersection)                             |                | 540 | 431.4 | 6.21e-7 |
| Gene                          | transcription, DNA-templated                         |                |     |       |         |
| Ontology - Biological Process | predicted (intersection)                             |                | 675 | 555.2 | 6.21e-7 |
| Gene                          | regulation of viral genome replication               |                |     |       |         |
| Ontology - Biological Process | experimental (any)                                   |                | 11  | 1.116 | 6.45e-7 |
| Gene                          | positive regulation of cellular biosynthetic process |                |     |       |         |
| Ontology - Biological Process | experimental (any)                                   |                | 49  | 21.33 | 7.55e-7 |
| Gene                          | negative regulation of viral genome replication      |                |     |       |         |
| Ontology - Biological Process | experimental (any)                                   |                | 9   | 0.664 | 7.56e-7 |
| Gene                          | regulation of protein phosphorylation                |                |     |       |         |
| Ontology - Biological Process | experimental (any)                                   |                | 39  | 14.81 | 8.41e-7 |

|                      |            |             |     |       |         |
|----------------------|------------|-------------|-----|-------|---------|
| Gene                 | regulation |             |     |       |         |
| Ontology - of        |            |             |     |       |         |
| Biological           | cytokine   | experimen   |     |       |         |
| Process              | production | tal (any)   | 26  | 7.334 | 8.81e-7 |
|                      | regulation |             |     |       |         |
| Gene                 | of         |             |     |       |         |
| Ontology - programm  |            |             |     |       |         |
| Biological           | ed cell    | experimen   |     |       |         |
| Process              | death      | tal (any)   | 43  | 17.47 | 9.36e-7 |
| Gene                 |            |             |     |       |         |
| Ontology - response  |            |             |     |       |         |
| Biological           | to         | experimen   |     |       |         |
| Process              | bacterium  | tal (any)   | 23  | 5.886 | 9.91e-7 |
| Gene                 |            |             |     |       |         |
| Ontology -           |            |             |     |       |         |
| Biological           |            | experimen   |     |       |         |
| Process              | secretion  | tal (any)   | 43  | 17.53 | 9.91e-7 |
| Gene                 |            |             |     |       |         |
| Ontology - leukocyte |            |             |     |       |         |
| Biological           | cell-cell  | experimen   |     |       |         |
| Process              | adhesion   | tal (any)   | 18  | 3.627 | 9.94e-7 |
|                      | negative   |             |     |       |         |
| Gene                 | regulation |             |     |       |         |
| Ontology - of        |            |             |     |       |         |
| Biological           | apoptotic  | experimen   |     |       |         |
| Process              | process    | tal (any)   | 31  | 10.19 | 1.08e-6 |
| Gene                 |            |             |     |       |         |
| Ontology -           |            |             |     |       |         |
| Biological           | response   | experimen   |     |       |         |
| Process              | to lipid   | tal (any)   | 31  | 10.19 | 1.08e-6 |
| Gene                 |            |             |     |       |         |
| Ontology -           |            |             |     |       |         |
| Biological           | cytokine   | experimen   |     |       |         |
| Process              | production | tal (any)   | 27  | 8.025 | 1.20e-6 |
| Gene                 |            |             |     |       |         |
| Ontology - defense   |            |             |     |       |         |
| Biological           | response   | experimen   |     |       |         |
| Process              | to virus   | tal (any)   | 15  | 2.525 | 1.33e-6 |
| Gene                 |            |             |     |       |         |
| Ontology - RNA       |            | predicted   |     |       |         |
| Biological           | metabolic  | (intersecti |     |       |         |
| Process              | process    | on)         | 819 | 695   | 1.48e-6 |
| Gene                 |            |             |     |       |         |
| Ontology - of RNA    |            | predicted   |     |       |         |
| Biological           | biosynthet | (intersecti |     |       |         |
| Process              | ic process | on)         | 653 | 539.5 | 1.48e-6 |

|                               |                              |                          |     |       |         |
|-------------------------------|------------------------------|--------------------------|-----|-------|---------|
| Gene                          | regulation of                |                          |     |       |         |
| Ontology - Biological Process | transcription, DNA-templated | predicted (intersection) | 639 | 526.1 | 1.48e-6 |
| Gene                          | negative regulation of       |                          |     |       |         |
| Ontology - Biological Process | programmed cell death        | experimental (any)       | 31  | 10.39 | 1.56e-6 |
| Gene                          | regulation of                |                          |     |       |         |
| Ontology - Biological Process | apoptotic process            | experimental (any)       | 42  | 17.22 | 1.56e-6 |
| Gene                          | cell population              |                          |     |       |         |
| Ontology - Biological Process | proliferation                | experimental (any)       | 48  | 21.3  | 1.57e-6 |
| Gene                          | I-kappaB                     |                          |     |       |         |
| Ontology - Biological Process | kinase/NF-kappaB signaling   | experimental (any)       | 16  | 2.963 | 1.66e-6 |
| Gene                          | signal                       |                          |     |       |         |
| Ontology - Biological Process | transduction                 | experimental (any)       | 94  | 58.34 | 2.08e-6 |
| Gene                          | regulation of nucleic acid-  |                          |     |       |         |
| Ontology - Biological Process | templated transcription      | predicted (intersection) | 650 | 538.2 | 2.16e-6 |
| Gene                          | response to                  |                          |     |       |         |
| Ontology - Biological Process | mechanical stimulus          | experimental (any)       | 14  | 2.285 | 2.39e-6 |
| Gene                          |                              |                          |     |       |         |
| Ontology - Biological Process | hemopoiesis                  | experimental (any)       | 29  | 9.62  | 3.34e-6 |

|            |                           |                       |    |       |         |
|------------|---------------------------|-----------------------|----|-------|---------|
| Gene       | regulation                |                       |    |       |         |
| Ontology - | of                        |                       |    |       |         |
| Biological | phosphorylation           | experimental (any)    | 40 | 16.45 | 3.47e-6 |
| Process    |                           |                       |    |       |         |
| Gene       | negative                  |                       |    |       |         |
| Ontology - | regulation                |                       |    |       |         |
| Biological | of cell                   | experimental (any)    | 32 | 11.43 | 3.56e-6 |
| Process    | death                     |                       |    |       |         |
| Gene       | negative                  |                       |    |       |         |
| Ontology - | regulation                |                       |    |       |         |
| Biological | of viral                  | experimental (any)    | 10 | 1.09  | 4.04e-6 |
| Process    | process                   |                       |    |       |         |
| Gene       |                           |                       |    |       |         |
| Ontology - |                           |                       |    |       |         |
| Biological | leukocyte                 | experimental (any)    | 35 | 13.38 | 4.26e-6 |
| Process    | activation                |                       |    |       |         |
| Gene       | cellular                  |                       |    |       |         |
| Ontology - | response                  |                       |    |       |         |
| Biological | to                        | experimental (strong) | 14 | 2.271 | 5.07e-6 |
| Process    | lipopolysaccharide        |                       |    |       |         |
| Gene       | intracellular             |                       |    |       |         |
| Ontology - | signal                    | experimental (strong) | 45 | 21.89 | 5.07e-6 |
| Biological | transduction              |                       |    |       |         |
| Process    |                           |                       |    |       |         |
| Gene       | positive                  |                       |    |       |         |
| Ontology - | regulation                |                       |    |       |         |
| Biological | of cellular               | experimental (strong) | 37 | 14.84 | 5.07e-6 |
| Process    | protein metabolic process |                       |    |       |         |
| Gene       | positive                  |                       |    |       |         |
| Ontology - | regulation                |                       |    |       |         |
| Biological | of                        | experimental (strong) | 30 | 10.66 | 5.07e-6 |
| Process    | phosphorylation           |                       |    |       |         |
| Gene       | positive                  |                       |    |       |         |
| Ontology - | regulation                |                       |    |       |         |
| Biological | of protein                | experimental (strong) | 37 | 15.74 | 5.07e-6 |
| Process    | metabolic process         |                       |    |       |         |



|                                             |                                                                               |                              |    |       |         |
|---------------------------------------------|-------------------------------------------------------------------------------|------------------------------|----|-------|---------|
| Gene<br>Ontology -<br>Biological<br>Process | positive<br>regulation<br>of protein<br>modification<br>process               | experimen<br>tal<br>(strong) | 32 | 12.13 | 5.07e-6 |
| Gene<br>Ontology -<br>Biological<br>Process | positive<br>regulation<br>of protein<br>phosphorylation                       | experimen<br>tal<br>(strong) | 30 | 10.32 | 5.07e-6 |
| Gene<br>Ontology -<br>Biological<br>Process | regulation<br>of<br>intracellul<br>ar signal<br>transducti<br>on              | experimen<br>tal<br>(strong) | 38 | 16.29 | 5.07e-6 |
| Gene<br>Ontology -<br>Biological<br>Process | viral<br>genome<br>replication                                                | experimen<br>tal (any)       | 11 | 1.422 | 5.42e-6 |
| Gene<br>Ontology -<br>Biological<br>Process | protein<br>phosphorylation                                                    | experimen<br>tal (any)       | 46 | 20.95 | 5.99e-6 |
| Gene<br>Ontology -<br>Biological<br>Process | regulation<br>of cellular<br>protein<br>metabolic<br>process                  | experimen<br>tal (any)       | 55 | 27.49 | 5.99e-6 |
| Gene<br>Ontology -<br>Biological<br>Process | regulation<br>of immune<br>response                                           | experimen<br>tal (any)       | 30 | 10.55 | 6.20e-6 |
| Gene<br>Ontology -<br>Biological<br>Process | positive<br>regulation<br>of<br>macromol<br>ecule<br>biosynthet<br>ic process | experimen<br>tal (any)       | 45 | 20.32 | 6.33e-6 |

|                                             |                                                                      |                              |    |       |         |
|---------------------------------------------|----------------------------------------------------------------------|------------------------------|----|-------|---------|
| Gene<br>Ontology -<br>Biological<br>Process | viral<br>process                                                     | experimen<br>tal (any)       | 29 | 9.992 | 6.45e-6 |
| Gene<br>Ontology -<br>Biological<br>Process | leukocyte<br>differentia<br>tion                                     | experimen<br>tal (any)       | 21 | 5.647 | 6.70e-6 |
| Gene<br>Ontology -<br>Biological<br>Process | regulation<br>of signal<br>transducti<br>on                          | experimen<br>tal (any)       | 66 | 36.17 | 6.80e-6 |
| Gene<br>Ontology -<br>Biological<br>Process | positive<br>regulation<br>of immune<br>system<br>process             | experimen<br>tal (any)       | 31 | 11.24 | 6.96e-6 |
| Gene<br>Ontology -<br>Biological<br>Process | cell<br>activation                                                   | experimen<br>tal (any)       | 37 | 15.04 | 7.21e-6 |
| Gene<br>Ontology -<br>Biological<br>Process | positive<br>regulation<br>of<br>transcripti<br>on, DNA-<br>templated | experimen<br>tal (any)       | 39 | 16.38 | 7.41e-6 |
| Gene<br>Ontology -<br>Biological<br>Process | cellular<br>response<br>to lipid                                     | experimen<br>tal (any)       | 23 | 6.776 | 8.25e-6 |
| Gene<br>Ontology -<br>Biological<br>Process | inflammat<br>ory<br>response                                         | experimen<br>tal (any)       | 23 | 6.79  | 8.44e-6 |
| Gene<br>Ontology -<br>Biological<br>Process | cellular<br>response<br>to<br>molecule<br>of<br>bacterial<br>origin  | experimen<br>tal<br>(strong) | 14 | 2.4   | 8.85e-6 |

|                               |                                   |                       |    |       |         |
|-------------------------------|-----------------------------------|-----------------------|----|-------|---------|
| Gene                          | leukocyte adhesion to             |                       |    |       |         |
| Ontology - Biological Process | vascular endothelial cell         | experimental (strong) | 7  | 0.413 | 8.85e-6 |
| Gene                          | positive regulation of            |                       |    |       |         |
| Ontology - Biological Process | intracellular signal transduction | experimental (strong) | 29 | 10.51 | 8.85e-6 |
| Gene                          | positive regulation of            |                       |    |       |         |
| Ontology - Biological Process | NIK/NF-kappaB signaling           | experimental (any)    | 9  | 0.930 | 9.02e-6 |
| Gene                          | positive regulation of            |                       |    |       |         |
| Ontology - Biological Process | cytokine production               | experimental (any)    | 19 | 4.797 | 9.02e-6 |
| Gene                          | positive regulation of            |                       |    |       |         |
| Ontology - Biological Process | signal transduction               | experimental (strong) | 36 | 15.62 | 9.35e-6 |
| Gene                          | lipopolysaccharide-mediated       |                       |    |       |         |
| Ontology - Biological Process | signaling pathway                 | experimental (strong) | 9  | 0.852 | 9.68e-6 |
| Gene                          | positive regulation of            |                       |    |       |         |
| Ontology - Biological Process | cellular metabolic process        | experimental (strong) | 50 | 28.06 | 9.68e-6 |
| Gene                          |                                   |                       |    |       |         |
| Ontology - Biological Process | cell adhesion                     | experimental (any)    | 36 | 14.62 | 9.72e-6 |

|                                    |                                                                  |                    |    |       |         |
|------------------------------------|------------------------------------------------------------------|--------------------|----|-------|---------|
| Gene Ontology - Biological Process | regulation of phosphorus metabolic process                       | experimental (any) | 42 | 18.66 | 9.91e-6 |
| Gene Ontology - Biological Process | cellular protein modification                                    | experimental (any) | 75 | 44.15 | 1.08e-5 |
| Gene Ontology - Biological Process | positive regulation of cell death                                | experimental (any) | 25 | 8.012 | 1.08e-5 |
| Gene Ontology - Biological Process | regulation of cell differentiation                               | experimental (any) | 30 | 10.92 | 1.08e-5 |
| Gene Ontology - Biological Process | protein modification                                             | experimental (any) | 75 | 44.15 | 1.08e-5 |
| Gene Ontology - Biological Process | cellular response to interleukin-1                               | experimental (any) | 12 | 1.913 | 1.15e-5 |
| Gene Ontology - Biological Process | positive regulation of DNA-binding transcription factor activity | experimental (any) | 15 | 3.096 | 1.21e-5 |
| Gene Ontology - Biological Process | regulation of protein metabolic process                          | experimental (any) | 56 | 29.17 | 1.36e-5 |
| Gene Ontology - Biological Process | regulation of cell-cell adhesion                                 | experimental (any) | 18 | 4.491 | 1.40e-5 |

|                    |                                    |    |       |         |  |
|--------------------|------------------------------------|----|-------|---------|--|
| Gene               | positive regulation                |    |       |         |  |
| Ontology -         | of gene                            |    |       |         |  |
| Biological Process | expression experimental (any)      | 45 | 21.23 | 1.72e-5 |  |
| Gene               | regulation                         |    |       |         |  |
| Ontology -         | of MAPK cascade                    |    |       |         |  |
| Biological Process | experimental (any)                 | 24 | 7.706 | 1.79e-5 |  |
| Gene               | regulation                         |    |       |         |  |
| Ontology -         | of cell differentiation            |    |       |         |  |
| Biological Process | experimental (any)                 | 43 | 19.9  | 1.86e-5 |  |
| Gene               | regulation                         |    |       |         |  |
| Ontology -         | of viral life cycle                |    |       |         |  |
| Biological Process | experimental (any)                 | 11 | 1.661 | 1.86e-5 |  |
| Gene               | regulation                         |    |       |         |  |
| Ontology -         | of viral process                   |    |       |         |  |
| Biological Process | experimental (any)                 | 13 | 2.392 | 1.86e-5 |  |
| Gene               | immune system                      |    |       |         |  |
| Ontology -         | development                        |    |       |         |  |
| Biological Process | experimental (any)                 | 29 | 10.72 | 2.07e-5 |  |
| Gene               | regulation                         |    |       |         |  |
| Ontology -         | cell communication                 |    |       |         |  |
| Biological Process | experimental (any)                 | 96 | 63.53 | 2.21e-5 |  |
| Gene               | regulation                         |    |       |         |  |
| Ontology -         | of hemopoiesis                     |    |       |         |  |
| Biological Process | experimental (any)                 | 19 | 5.169 | 2.30e-5 |  |
| Gene               | leukocyte activation               |    |       |         |  |
| Ontology -         | involved in                        |    |       |         |  |
| Biological Process | immune response experimental (any) | 24 | 7.866 | 2.40e-5 |  |
| Gene               | cell activation                    |    |       |         |  |
| Ontology -         | involved in                        |    |       |         |  |
| Biological Process | immune response experimental (any) | 24 | 7.919 | 2.67e-5 |  |

|                                    |                                                             |                    |    |       |         |
|------------------------------------|-------------------------------------------------------------|--------------------|----|-------|---------|
| Gene Ontology - Biological Process | positive regulation of nucleic acid-templated transcription | experimental (any) | 39 | 17.49 | 2.93e-5 |
| Gene Ontology - Biological Process | positive regulation of RNA biosynthesis                     | experimental (any) | 39 | 17.5  | 2.95e-5 |
| Gene Ontology - Biological Process | regulation of cell migration                                | experimental (any) | 26 | 9.168 | 3.07e-5 |
| Gene Ontology - Biological Process | regulation of cell motility                                 | experimental (any) | 27 | 9.766 | 3.07e-5 |
| Gene Ontology - Biological Process | secretion by cell                                           | experimental (any) | 37 | 16.18 | 3.07e-5 |
| Gene Ontology - Biological Process | viral life cycle                                            | experimental (any) | 16 | 3.827 | 3.07e-5 |
| Gene Ontology - Biological Process | signaling                                                   | experimental (any) | 95 | 63.18 | 3.13e-5 |
| Gene Ontology - Biological Process | MAPK cascade response                                       | experimental (any) | 27 | 9.872 | 3.70e-5 |
| Gene Ontology - Biological Process | response to interleukin-1                                   | experimental (any) | 12 | 2.179 | 3.72e-5 |

|                               |                             |                       |    |       |         |
|-------------------------------|-----------------------------|-----------------------|----|-------|---------|
| Gene                          | regulation of cellular      |                       |    |       |         |
| Ontology - Biological Process | protein metabolic process   | experimental (strong) | 42 | 21.6  | 3.84e-5 |
| Gene                          | negative regulation of cell |                       |    |       |         |
| Ontology - Biological Process | population proliferation    | experimental (any)    | 23 | 7.56  | 3.87e-5 |
| Gene                          | signal transduction by      |                       |    |       |         |
| Ontology - Biological Process | protein phosphorylation     | experimental (any)    | 27 | 9.912 | 3.89e-5 |
| Gene                          | protein phosphorylation     | experimental (strong) | 38 | 18.3  | 3.97e-5 |
| Gene                          | response to                 | experimental          |    |       |         |
| Ontology - Biological Process | lipopolysaccharide          | experimental (strong) | 16 | 3.717 | 3.97e-5 |
| Gene                          | regulation of I-kappaB      |                       |    |       |         |
| Ontology - Biological Process | kinase/NF-kappaB signaling  | experimental (any)    | 13 | 2.631 | 4.50e-5 |
| Gene                          | regulation of myeloid       |                       |    |       |         |
| Ontology - Biological Process | cell differentiation        | experimental (any)    | 13 | 2.631 | 4.50e-5 |
| Gene                          | protein metabolic process   | experimental (any)    | 91 | 60.11 | 4.55e-5 |

|            |             |           |     |       |         |
|------------|-------------|-----------|-----|-------|---------|
| Gene       |             |           |     |       |         |
| Ontology - | regulation  |           |     |       |         |
| Biological | of          | experimen |     |       |         |
| Process    | secretion   | tal (any) | 24  | 8.238 | 4.65e-5 |
| Gene       | leukocyte   |           |     |       |         |
| Ontology - | activation  |           |     |       |         |
| Biological | involved in | experimen |     |       |         |
| Process    | immune      | tal       | 19  | 5.343 | 4.73e-5 |
| Process    | response    | (strong)  |     |       |         |
| Gene       | positive    |           |     |       |         |
| Ontology - | regulation  |           |     |       |         |
| Biological | of NIK/NF-  | experimen |     |       |         |
| Process    | kappaB      | tal       | 9   | 1.058 | 4.73e-5 |
| Process    | signaling   | (strong)  |     |       |         |
| Gene       | positive    |           |     |       |         |
| Ontology - | regulation  |           |     |       |         |
| Biological | of          |           |     |       |         |
| Process    | leukocyte   |           |     |       |         |
| Process    | adhesion    |           |     |       |         |
| Gene       | to          |           |     |       |         |
| Ontology - | vascular    | experimen |     |       |         |
| Biological | endothelia  | tal       | 5   | 0.206 | 4.73e-5 |
| Process    | l cell      | (strong)  |     |       |         |
| Gene       | regulation  |           |     |       |         |
| Ontology - | of          | experimen |     |       |         |
| Biological | leukocyte   | tal       | 11  | 1.704 | 4.73e-5 |
| Process    | migration   | (strong)  |     |       |         |
| Gene       | cellular    |           |     |       |         |
| Ontology - | response    |           |     |       |         |
| Biological | to          |           |     |       |         |
| Process    | chemokin    | experimen | 7   | 0.624 | 4.74e-5 |
| Process    | e           | tal (any) |     |       |         |
| Gene       | regulation  |           |     |       |         |
| Ontology - | of          | experimen |     |       |         |
| Biological | signaling   | tal (any) | 68  | 40.27 | 4.82e-5 |
| Process    | signaling   | tal (any) |     |       |         |
| Gene       | response    |           |     |       |         |
| Ontology - | to          | experimen |     |       |         |
| Biological | stimulus    | tal (any) | 121 | 88.74 | 4.82e-5 |
| Process    | stimulus    | tal (any) |     |       |         |
| Gene       | leukocyte   |           |     |       |         |
| Ontology - | migration   | experimen |     |       |         |
| Biological | migration   | tal (any) | 17  | 4.491 | 4.86e-5 |
| Process    | migration   | tal (any) |     |       |         |



|                               |                                                    |    |       |         |  |
|-------------------------------|----------------------------------------------------|----|-------|---------|--|
| Gene                          | cell activation                                    |    |       |         |  |
| Ontology - Biological Process | involved in experimental immune response (strong)  | 19 | 5.395 | 4.87e-5 |  |
| Gene                          | response                                           |    |       |         |  |
| Ontology - Biological Process | to interferon-gamma experimental (any)             | 11 | 1.873 | 4.91e-5 |  |
| Gene                          | cellular response                                  |    |       |         |  |
| Ontology - Biological Process | to experimental cytokine stimulus (strong)         | 28 | 11.07 | 5.07e-5 |  |
| Gene                          | regulation                                         |    |       |         |  |
| Ontology - Biological Process | of protein experimental phosphorylation (strong)   | 32 | 13.96 | 5.07e-5 |  |
| Gene                          | response to molecule                               |    |       |         |  |
| Ontology - Biological Process | of experimental bacterial origin (strong)          | 16 | 3.872 | 5.07e-5 |  |
| Gene                          |                                                    |    |       |         |  |
| Ontology - Biological Process | lymphocyte experimental activation (any)           | 22 | 7.162 | 5.12e-5 |  |
| Gene                          | MyD88-dependent toll-like receptor                 |    |       |         |  |
| Ontology - Biological Process | signaling experimental pathway (any)               | 6  | 0.425 | 5.93e-5 |  |
| Gene                          | positive                                           |    |       |         |  |
| Ontology - Biological Process | regulation of cell experimental activation (any)   | 15 | 3.614 | 6.08e-5 |  |
| Gene                          | positive                                           |    |       |         |  |
| Ontology - Biological Process | regulation of T cell experimental activation (any) | 12 | 2.312 | 6.09e-5 |  |

|            |             |             |     |       |         |
|------------|-------------|-------------|-----|-------|---------|
| Gene       | regulation  |             |     |       |         |
| Ontology - | of RNA      |             |     |       |         |
| Biological | metabolic   | experimen   |     |       |         |
| Process    | process     | tal (any)   | 69  | 41.46 | 6.18e-5 |
| Gene       | regulation  |             |     |       |         |
| Ontology - | of          |             |     |       |         |
| Biological | leukocyte   | experimen   |     |       |         |
| Process    | migration   | tal (any)   | 11  | 1.927 | 6.18e-5 |
| Gene       | cellular    |             |     |       |         |
| Ontology - | macromol    |             |     |       |         |
| Biological | ecule       |             |     |       |         |
| Process    | biosynthes  | experimen   |     |       |         |
|            | ic process  | tal (any)   | 83  | 53.51 | 6.24e-5 |
| Gene       |             |             |     |       |         |
| Ontology - | myeloid     |             |     |       |         |
| Biological | leukocyte   | experimen   |     |       |         |
| Process    | activation  | tal (any)   | 22  | 7.308 | 6.71e-5 |
| Gene       | positive    |             |     |       |         |
| Ontology - | regulation  |             |     |       |         |
| Biological | of MAPK     | experimen   |     |       |         |
| Process    | cascade     | tal (any)   | 19  | 5.674 | 6.94e-5 |
| Gene       | regulation  |             |     |       |         |
| Ontology - | of cellular |             |     |       |         |
| Biological | componen    |             |     |       |         |
| Process    | t           | predicted   |     |       |         |
|            | organizati  | (intersecti |     |       |         |
|            | on          | on)         | 446 | 361.3 | 6.99e-5 |
| Gene       | cellular    |             |     |       |         |
| Ontology - | protein     |             |     |       |         |
| Biological | metabolic   | experimen   |     |       |         |
| Process    | process     | tal (any)   | 84  | 54.6  | 7.16e-5 |
| Gene       |             |             |     |       |         |
| Ontology - |             |             |     |       |         |
| Biological | cell        | experimen   |     |       |         |
| Process    | migration   | tal (any)   | 34  | 14.99 | 8.14e-5 |
| Gene       |             |             |     |       |         |
| Ontology - | leukocyte   |             |     |       |         |
| Biological | mediated    | experimen   |     |       |         |
| Process    | immunity    | tal (any)   | 24  | 8.597 | 8.14e-5 |
| Gene       | regulation  |             |     |       |         |
| Ontology - | of NIK/NF-  |             |     |       |         |
| Biological | kappaB      | experimen   |     |       |         |
| Process    | signaling   | tal (any)   | 9   | 1.276 | 8.14e-5 |

|                                    |                                                                                |                    |   |       |         |
|------------------------------------|--------------------------------------------------------------------------------|--------------------|---|-------|---------|
| Gene Ontology - Biological Process | regulation of extrinsic apoptotic signaling pathway via death domain receptors | experimental (any) | 7 | 0.691 | 8.14e-5 |
|------------------------------------|--------------------------------------------------------------------------------|--------------------|---|-------|---------|

|                                    |                                                   |                    |    |       |         |
|------------------------------------|---------------------------------------------------|--------------------|----|-------|---------|
| Gene Ontology - Biological Process | regulation of nitrogen compound metabolic process | experimental (any) | 92 | 61.97 | 8.14e-5 |
|------------------------------------|---------------------------------------------------|--------------------|----|-------|---------|

|                                    |                            |                    |    |       |         |
|------------------------------------|----------------------------|--------------------|----|-------|---------|
| Gene Ontology - Biological Process | response to glucocorticoid | experimental (any) | 10 | 1.621 | 8.14e-5 |
|------------------------------------|----------------------------|--------------------|----|-------|---------|

|                                    |                                     |                    |    |       |         |
|------------------------------------|-------------------------------------|--------------------|----|-------|---------|
| Gene Ontology - Biological Process | response to organic cyclic compound | experimental (any) | 27 | 10.42 | 8.14e-5 |
|------------------------------------|-------------------------------------|--------------------|----|-------|---------|

|                                    |                                          |                    |   |       |         |
|------------------------------------|------------------------------------------|--------------------|---|-------|---------|
| Gene Ontology - Biological Process | cellular response to mechanical stimulus | experimental (any) | 8 | 0.970 | 8.22e-5 |
|------------------------------------|------------------------------------------|--------------------|---|-------|---------|

|                                    |                          |                    |    |       |         |
|------------------------------------|--------------------------|--------------------|----|-------|---------|
| Gene Ontology - Biological Process | regulation of chemotaxis | experimental (any) | 11 | 2.006 | 8.27e-5 |
|------------------------------------|--------------------------|--------------------|----|-------|---------|

|                                    |                 |                    |   |       |         |
|------------------------------------|-----------------|--------------------|---|-------|---------|
| Gene Ontology - Biological Process | bone remodeling | experimental (any) | 8 | 0.983 | 8.98e-5 |
|------------------------------------|-----------------|--------------------|---|-------|---------|

|                                    |                                            |                    |   |       |         |
|------------------------------------|--------------------------------------------|--------------------|---|-------|---------|
| Gene Ontology - Biological Process | positive regulation of leukocyte migration | experimental (any) | 9 | 1.302 | 9.08e-5 |
|------------------------------------|--------------------------------------------|--------------------|---|-------|---------|

|            |                    |                                                            |              |    |       |         |
|------------|--------------------|------------------------------------------------------------|--------------|----|-------|---------|
| Gene       |                    |                                                            |              |    |       |         |
| Ontology - | Biological Process | phosphorylation (strong)                                   | experimental | 39 | 20    | 9.21e-5 |
| Gene       |                    | positive regulation                                        |              |    |       |         |
| Ontology - | Biological Process | leukocyte migration (strong)                               | experimental | 9  | 1.187 | 9.71e-5 |
| Gene       |                    | positive regulation                                        |              |    |       |         |
| Ontology - | Biological Process | metabolic process (strong)                                 | experimental | 50 | 30.43 | 9.71e-5 |
| Gene       |                    | regulation                                                 |              |    |       |         |
| Ontology - | Biological Process | of protein metabolic process (strong)                      | experimental | 42 | 22.74 | 9.71e-5 |
| Gene       |                    | positive regulation of I-kappaB kinase/NF-kappaB signaling |              |    |       |         |
| Ontology - | Biological Process | kinase/NF-kappaB signaling (any)                           | experimental | 11 | 2.046 | 9.79e-5 |
| Gene       |                    | reactive oxygen species metabolic process                  |              |    |       |         |
| Ontology - | Biological Process | metabolic process (any)                                    | experimental | 13 | 2.897 | 1.02e-4 |
| Gene       |                    | regulation                                                 |              |    |       |         |
| Ontology - | Biological Process | of locomotion (any)                                        | experimental | 27 | 10.58 | 1.02e-4 |
| Gene       |                    | regulation of cellular component movement                  |              |    |       |         |
| Ontology - | Biological Process | of cellular component movement (any)                       | experimental | 27 | 10.6  | 1.05e-4 |

|            |              |           |    |       |         |
|------------|--------------|-----------|----|-------|---------|
| Gene       | toll-like    |           |    |       |         |
| Ontology - | receptor     |           |    |       |         |
| Biological | signaling    | experimen |    |       |         |
| Process    | pathway      | tal (any) | 10 | 1.687 | 1.07e-4 |
| Gene       |              |           |    |       |         |
| Ontology - |              |           |    |       |         |
| Biological | protein      | experimen |    |       |         |
| Process    | secretion    | tal (any) | 19 | 5.926 | 1.13e-4 |
| Gene       |              |           |    |       |         |
| Ontology - | regulation   |           |    |       |         |
| Biological | of RNA       |           |    |       |         |
| Process    | biosynthesi  | experimen |    |       |         |
|            | c process    | tal (any) | 65 | 38.98 | 1.13e-4 |
| Gene       |              |           |    |       |         |
| Ontology - | myeloid      | experimen |    |       |         |
| Biological | leukocyte    | tal       |    |       |         |
| Process    | activation   | (strong)  | 17 | 4.723 | 1.20e-4 |
| Gene       |              |           |    |       |         |
| Ontology - | RNA          |           |    |       |         |
| Biological | biosynthesi  | experimen |    |       |         |
| Process    | c process    | tal (any) | 67 | 40.96 | 1.45e-4 |
| Gene       |              |           |    |       |         |
| Ontology - |              | experimen |    |       |         |
| Biological | immune       | tal       |    |       |         |
| Process    | response     | (strong)  | 31 | 13.99 | 1.49e-4 |
| Gene       |              |           |    |       |         |
| Ontology - | transcripti  |           |    |       |         |
| Biological | on, DNA-     | experimen |    |       |         |
| Process    | templated    | tal (any) | 66 | 40.18 | 1.51e-4 |
| Gene       |              |           |    |       |         |
| Ontology - |              |           |    |       |         |
| Biological | phosphory    | experimen |    |       |         |
| Process    | lation       | tal (any) | 48 | 25.76 | 1.57e-4 |
|            | regulation   |           |    |       |         |
|            | of DNA-      |           |    |       |         |
| Gene       | binding      |           |    |       |         |
| Ontology - | transcripti  |           |    |       |         |
| Biological | on factor    | experimen |    |       |         |
| Process    | activity     | tal (any) | 17 | 5.009 | 1.63e-4 |
| Gene       |              |           |    |       |         |
| Ontology - | regulation   |           |    |       |         |
| Biological | of cell      |           |    |       |         |
| Process    | population   | experimen |    |       |         |
|            | proliferatio | tal       |    |       |         |
|            | n            | (strong)  | 35 | 17.24 | 1.69e-4 |

|            |             |           |     |       |         |
|------------|-------------|-----------|-----|-------|---------|
| Gene       | regulation  |           |     |       |         |
| Ontology - | of signal   | experimen |     |       |         |
| Biological | transducti  | tal       |     |       |         |
| Process    | on          | (strong)  | 45  | 26.07 | 1.69e-4 |
| Gene       |             |           |     |       |         |
| Ontology - | response    | experimen |     |       |         |
| Biological | to          | tal       |     |       |         |
| Process    | cytokine    | (strong)  | 28  | 11.9  | 1.69e-4 |
| Gene       | regulation  |           |     |       |         |
| Ontology - | of          | experimen |     |       |         |
| Biological | phosphory   | tal       |     |       |         |
| Process    | lation      | (strong)  | 32  | 14.94 | 1.78e-4 |
| Gene       |             |           |     |       |         |
| Ontology - |             |           |     |       |         |
| Biological | chemotaxi   | experimen |     |       |         |
| Process    | s           | tal (any) | 19  | 6.139 | 1.80e-4 |
| Gene       | nervous     |           |     |       |         |
| Ontology - | system      |           |     |       |         |
| Biological | developm    | predicted |     |       |         |
| Process    | ent         | (union)   | 883 | 770.8 | 1.81e-4 |
| Gene       |             |           |     |       |         |
| Ontology - |             |           |     |       |         |
| Biological | T cell      | experimen |     |       |         |
| Process    | activation  | tal (any) | 17  | 5.062 | 1.84e-4 |
| Gene       | myeloid     |           |     |       |         |
| Ontology - | cell        |           |     |       |         |
| Biological | differentia | experimen |     |       |         |
| Process    | tion        | tal (any) | 16  | 4.544 | 1.85e-4 |
|            | regulation  |           |     |       |         |
| Gene       | of          |           |     |       |         |
| Ontology - | lymphocyt   |           |     |       |         |
| Biological | e           | experimen |     |       |         |
| Process    | activation  | tal (any) | 16  | 4.557 | 1.90e-4 |
|            | regulation  |           |     |       |         |
|            | of nucleic  |           |     |       |         |
| Gene       | acid-       |           |     |       |         |
| Ontology - | templated   |           |     |       |         |
| Biological | transcripti | experimen |     |       |         |
| Process    | on          | tal (any) | 64  | 38.86 | 1.94e-4 |
| Gene       | response    |           |     |       |         |
| Ontology - | to          |           |     |       |         |
| Biological | nitrogen    | experimen |     |       |         |
| Process    | compound    | tal (any) | 28  | 11.67 | 1.94e-4 |

|                                    |                                            |                       |     |       |         |
|------------------------------------|--------------------------------------------|-----------------------|-----|-------|---------|
| Gene Ontology - Biological Process | pattern recognition signaling pathway      | experimental (any)    | 11  | 2.232 | 2.01e-4 |
| Gene Ontology - Biological Process | regulation of transcription, DNA-templated | experimental (any)    | 63  | 38.09 | 2.02e-4 |
| Gene Ontology - Biological Process | response to corticosteroid                 | experimental (any)    | 10  | 1.834 | 2.02e-4 |
| Gene Ontology - Biological Process | peptide secretion                          | experimental (any)    | 19  | 6.218 | 2.04e-4 |
| Gene Ontology - Biological Process | cell death                                 | experimental (strong) | 39  | 20.86 | 2.10e-4 |
| Gene Ontology - Biological Process | cellular protein metabolic process         | experimental (strong) | 51  | 32.37 | 2.10e-4 |
| Gene Ontology - Biological Process | protein metabolic process                  | experimental (strong) | 53  | 34.51 | 2.10e-4 |
| Gene Ontology - Biological Process | response to hypoxia                        | experimental (any)    | 15  | 4.106 | 2.14e-4 |
| Gene Ontology - Biological Process | anatomical structure morphogenesis         | predicted (union)     | 965 | 852.4 | 2.16e-4 |
| Gene Ontology - Biological Process | dephosphorylation                          | predicted (union)     | 213 | 160.9 | 2.16e-4 |

|                    |                                                        |     |       |         |  |
|--------------------|--------------------------------------------------------|-----|-------|---------|--|
| Gene               | negative regulation                                    |     |       |         |  |
| Ontology -         | of gene                                                |     |       |         |  |
| Biological Process | expression predicted (union)                           | 675 | 581   | 2.16e-4 |  |
| Gene               | positive regulation                                    |     |       |         |  |
| Ontology -         | of                                                     |     |       |         |  |
| Biological Process | apoptotic process experimental (any)                   | 21  | 7.401 | 2.16e-4 |  |
| Gene               | positive regulation of                                 |     |       |         |  |
| Ontology -         | programmed cell death                                  |     |       |         |  |
| Biological Process | experimental (any)                                     | 21  | 7.454 | 2.39e-4 |  |
| Gene               | leukocyte migration                                    |     |       |         |  |
| Ontology -         | experimental (strong)                                  | 15  | 4.001 | 2.51e-4 |  |
| Biological Process | positive regulation of                                 |     |       |         |  |
| Gene               | leukocyte cell-cell adhesion                           |     |       |         |  |
| Ontology -         | experimental (strong)                                  | 12  | 2.581 | 2.53e-4 |  |
| Biological Process | regulation of cell adhesion experimental (strong)      | 21  | 7.485 | 2.53e-4 |  |
| Gene               | regulation of phosphorus metabolic process response to |     |       |         |  |
| Ontology -         | mechanical stimulus experimental (strong)              | 12  | 2.581 | 2.53e-4 |  |
| Biological Process | cell chemotaxis experimental (any)                     | 12  | 2.777 | 2.95e-4 |  |



|            |            |              |           |      |         |
|------------|------------|--------------|-----------|------|---------|
| Gene       |            |              |           |      |         |
| Ontology - | Biological | apoptotic    | experimen |      |         |
| Process    | process    | (strong)     | tal       | 37   | 19.56   |
|            |            |              |           |      | 3.00e-4 |
| Gene       |            |              |           |      |         |
| Ontology - | Biological | regulation   | experimen |      |         |
| Process    | of NIK/NF- | kappaB       | tal       | 9    | 1.42    |
|            | signaling  | (strong)     |           |      | 3.00e-4 |
| Gene       |            |              |           |      |         |
| Ontology - | Biological | positive     | experimen |      |         |
| Process    | regulation | of cell      | tal       | 16   | 4.672   |
|            | adhesion   | (strong)     |           |      | 3.22e-4 |
| Gene       |            |              |           |      |         |
| Ontology - | Biological | positive     | experimen |      |         |
| Process    | regulation | of cell      | tal (any) | 25   | 10.1    |
|            | population | proliferatio |           |      | 3.28e-4 |
| Gene       |            |              |           |      |         |
| Ontology - | Biological | positive     | experimen |      |         |
| Process    | regulation | of immune    | tal (any) | 22   | 8.225   |
|            | response   |              |           |      | 3.28e-4 |
| Gene       |            |              |           |      |         |
| Ontology - | Biological | cell         | experimen |      |         |
| Process    | motility   | tal (any)    | 34        | 16.2 | 3.38e-4 |
| Gene       |            |              |           |      |         |
| Ontology - | Biological | cytokine     | experimen |      |         |
| Process    | biosynthet | ic process   | tal (any) | 8    | 1.209   |
|            |            |              |           |      | 3.46e-4 |
| Gene       |            |              |           |      |         |
| Ontology - | Biological | nitric       | experimen |      |         |
| Process    | oxide      | metabolic    | tal (any) | 7    | 0.890   |
|            |            |              |           |      | 3.59e-4 |
| Gene       |            |              |           |      |         |
| Ontology - | Biological | tube         | experimen |      |         |
| Process    | morphoge   | nesis        | tal (any) | 24   | 9.54    |
|            |            |              |           |      | 3.64e-4 |
| Gene       |            |              |           |      |         |
| Ontology - | Biological | cytokine     | experimen |      |         |
| Process    | metabolic  | process      | tal (any) | 8    | 1.222   |
|            |            |              |           |      | 3.68e-4 |

|            |                       |     |       |         |  |
|------------|-----------------------|-----|-------|---------|--|
| Gene       | response              |     |       |         |  |
| Ontology - | to                    |     |       |         |  |
| Biological | organonitr            |     |       |         |  |
| Process    | ogen experimen        | 26  | 10.87 | 3.87e-4 |  |
| Gene       | compound              |     |       |         |  |
| Ontology - | tal (any)             |     |       |         |  |
| Biological | neuron                |     |       |         |  |
| Process    | differentia predicted | 512 | 432.2 | 3.91e-4 |  |
| Gene       | tion (union)          |     |       |         |  |
| Ontology - | cytokine-             |     |       |         |  |
| Biological | mediated experimen    |     |       |         |  |
| Process    | signaling tal         | 21  | 7.743 | 3.92e-4 |  |
| Gene       | pathway (strong)      |     |       |         |  |
| Ontology - |                       |     |       |         |  |
| Biological | positive              |     |       |         |  |
| Process    | regulation            |     |       |         |  |
| Gene       | of protein            |     |       |         |  |
| Ontology - | serine/thr            |     |       |         |  |
| Biological | eonine                |     |       |         |  |
| Process    | kinase experimen      | 14  | 3.84  | 3.93e-4 |  |
| Gene       | activity tal (any)    |     |       |         |  |
| Ontology - | lymphocyt             |     |       |         |  |
| Biological | e                     |     |       |         |  |
| Process    | differentia experimen | 14  | 3.853 | 4.06e-4 |  |
| Gene       | tion tal (any)        |     |       |         |  |
| Ontology - | regulation            |     |       |         |  |
| Biological | of protein experimen  | 16  | 4.903 | 4.11e-4 |  |
| Process    | secretion tal (any)   |     |       |         |  |
| Gene       | heart                 |     |       |         |  |
| Ontology - | valve                 |     |       |         |  |
| Biological | morphoge experimen    | 6   | 0.624 | 4.12e-4 |  |
| Process    | nesis tal (any)       |     |       |         |  |
| Gene       | interleukin-          |     |       |         |  |
| Ontology - | 1-                    |     |       |         |  |
| Biological | mediated              |     |       |         |  |
| Process    | signaling experimen   | 8   | 1.249 | 4.16e-4 |  |
| Gene       | pathway tal (any)     |     |       |         |  |
| Ontology - | programm experimen    |     |       |         |  |
| Biological | ed cell tal           | 37  | 19.9  | 4.32e-4 |  |
| Process    | death (strong)        |     |       |         |  |
| Gene       |                       |     |       |         |  |
| Ontology - | leukocyte             |     |       |         |  |
| Biological | chemotaxi experimen   | 10  | 2.033 | 4.43e-4 |  |
| Process    | s tal (any)           |     |       |         |  |

|            |              |           |    |       |         |
|------------|--------------|-----------|----|-------|---------|
| Gene       |              |           |    |       |         |
| Ontology - | leukocyte    | experimen |    |       |         |
| Biological | mediated     | tal       |    |       |         |
| Process    | immunity     | (strong)  | 17 | 5.395 | 4.55e-4 |
| Gene       | positive     |           |    |       |         |
| Ontology - | regulation   | experimen |    |       |         |
| Biological | of cell-cell | tal       |    |       |         |
| Process    | adhesion     | (strong)  | 13 | 3.252 | 4.55e-4 |
| Gene       |              |           |    |       |         |
| Ontology - |              |           |    |       |         |
| Biological | cell-cell    | experimen |    |       |         |
| Process    | adhesion     | tal (any) | 22 | 8.451 | 4.57e-4 |
| Gene       |              |           |    |       |         |
| Ontology - | response     |           |    |       |         |
| Biological | to steroid   | experimen |    |       |         |
| Process    | hormone      | tal (any) | 15 | 4.425 | 4.58e-4 |
| Gene       |              |           |    |       |         |
| Ontology - | leukocyte    | experimen |    |       |         |
| Biological | cell-cell    | tal       |    |       |         |
| Process    | adhesion     | (strong)  | 14 | 3.768 | 4.65e-4 |
| Gene       | cell         |           |    |       |         |
| Ontology - | population   | experimen |    |       |         |
| Biological | proliferatio | tal       |    |       |         |
| Process    | n            | (strong)  | 37 | 20.03 | 4.69e-4 |
| Gene       | reactive     |           |    |       |         |
| Ontology - | oxygen       |           |    |       |         |
| Biological | species      |           |    |       |         |
| Process    | biosynthes   | experimen |    |       |         |
|            | ic process   | tal (any) | 8  | 1.276 | 4.74e-4 |
| Gene       | regulation   |           |    |       |         |
| Ontology - | of           |           |    |       |         |
| Biological | interleukin- |           |    |       |         |
| Process    | 12           | experimen |    |       |         |
|            | biosynthes   | tal (any) | 3  | 0.080 | 5.11e-4 |
|            | ic process   |           |    |       |         |
| Gene       | regulation   |           |    |       |         |
| Ontology - | of reactive  |           |    |       |         |
| Biological | oxygen       |           |    |       |         |
| Process    | species      | experimen |    |       |         |
|            | metabolic    | tal (any) | 10 | 2.073 | 5.11e-4 |
|            | process      |           |    |       |         |

|                                             |                                                                                           |                              |     |       |         |
|---------------------------------------------|-------------------------------------------------------------------------------------------|------------------------------|-----|-------|---------|
| Gene<br>Ontology -<br>Biological<br>Process | neurogen<br>esis                                                                          | predicted<br>(union)         | 601 | 516.2 | 5.33e-4 |
| Gene<br>Ontology -<br>Biological<br>Process | immune<br>response-<br>regulating<br>signaling<br>pathway                                 | experimen<br>tal (any)       | 18  | 6.165 | 5.46e-4 |
| Gene<br>Ontology -<br>Biological<br>Process | activation<br>of NF-<br>kappaB-<br>inducing<br>kinase<br>activity<br>cellular<br>response | experimen<br>tal (any)       | 4   | 0.213 | 5.48e-4 |
| Gene<br>Ontology -<br>Biological<br>Process | to<br>interferon-<br>gamma<br>cellular                                                    | experimen<br>tal (any)       | 9   | 1.687 | 5.55e-4 |
| Gene<br>Ontology -<br>Biological<br>Process | response<br>to<br>interleukin-<br>6                                                       | experimen<br>tal (any)       | 5   | 0.412 | 5.64e-4 |
| Gene<br>Ontology -<br>Biological<br>Process | positive<br>regulation<br>of cell<br>migration                                            | experimen<br>tal (any)       | 17  | 5.62  | 5.64e-4 |
| Gene<br>Ontology -<br>Biological<br>Process | regulation<br>of T cell<br>activation                                                     | experimen<br>tal (any)       | 13  | 3.494 | 5.64e-4 |
| Gene<br>Ontology -<br>Biological<br>Process | response<br>to<br>bacterium                                                               | experimen<br>tal<br>(strong) | 16  | 4.956 | 6.01e-4 |
| Gene<br>Ontology -<br>Biological<br>Process | generatio<br>n of<br>neurons                                                              | predicted<br>(union)         | 566 | 484.9 | 6.10e-4 |
| Gene<br>Ontology -<br>Biological<br>Process | regulation<br>of cellular<br>componen<br>t<br>organizati<br>on                            | predicted<br>(union)         | 889 | 788.3 | 6.10e-4 |

|                       |                                       |                       |    |       |         |
|-----------------------|---------------------------------------|-----------------------|----|-------|---------|
| Gene                  |                                       |                       |    |       |         |
| Ontology - response   |                                       |                       |    |       |         |
| Biological Process    | to growth factor                      | experimental (any)    | 21 | 8.039 | 6.21e-4 |
| Gene                  |                                       |                       |    |       |         |
| Ontology - response   |                                       |                       |    |       |         |
| Biological Process    | to hormone                            | experimental (any)    | 25 | 10.59 | 6.23e-4 |
| Gene                  | regulation                            |                       |    |       |         |
| Ontology - of protein |                                       |                       |    |       |         |
| Biological Process    | localization                          | experimental (any)    | 26 | 11.27 | 6.36e-4 |
| Gene                  |                                       |                       |    |       |         |
| Ontology - regulation |                                       |                       |    |       |         |
| Biological Process    | of cell death                         | experimental (strong) | 34 | 17.78 | 6.57e-4 |
|                       | cellular response                     |                       |    |       |         |
| Gene                  | to                                    |                       |    |       |         |
| Ontology - mechanic   |                                       |                       |    |       |         |
| Biological Process    | stimulus                              | experimental (strong) | 8  | 1.239 | 7.17e-4 |
| Gene                  |                                       |                       |    |       |         |
| Ontology -            |                                       |                       |    |       |         |
| Biological Process    | neutrophil activation                 | experimental (any)    | 17 | 5.767 | 7.48e-4 |
|                       | positive regulation                   |                       |    |       |         |
| Gene                  |                                       |                       |    |       |         |
| Ontology - of protein |                                       |                       |    |       |         |
| Biological Process    | kinase activity                       | experimental (any)    | 17 | 5.767 | 7.48e-4 |
| Gene                  | response                              |                       |    |       |         |
| Ontology - to         |                                       |                       |    |       |         |
| Biological Process    | interleukin-6                         | experimental (any)    | 5  | 0.438 | 7.48e-4 |
| Gene                  |                                       |                       |    |       |         |
| Ontology - cell fate  |                                       |                       |    |       |         |
| Biological Process    | commitment                            | experimental (any)    | 11 | 2.644 | 7.58e-4 |
|                       | extrinsic apoptotic signaling pathway |                       |    |       |         |
| Gene                  |                                       |                       |    |       |         |
| Ontology - via death  |                                       |                       |    |       |         |
| Biological Process    | domain receptors                      | experimental (any)    | 7  | 1.023 | 7.58e-4 |

|            |                               |                       |     |       |         |
|------------|-------------------------------|-----------------------|-----|-------|---------|
| Gene       | negative regulation           |                       |     |       |         |
| Ontology - | of signal                     |                       |     |       |         |
| Biological | transduction                  | experimental (any)    | 30  | 14.15 | 7.58e-4 |
| Process    |                               |                       |     |       |         |
| Gene       | regulation of reactive oxygen |                       |     |       |         |
| Ontology - | species                       |                       |     |       |         |
| Biological | biosynthetic process          | experimental (any)    | 7   | 1.023 | 7.58e-4 |
| Process    |                               |                       |     |       |         |
| Gene       | MAPK cascade                  | experimental (strong) | 23  | 9.524 | 7.70e-4 |
| Ontology - |                               |                       |     |       |         |
| Biological |                               |                       |     |       |         |
| Process    |                               |                       |     |       |         |
| Gene       | positive regulation           |                       |     |       |         |
| Ontology - | of cell                       | experimental (any)    | 17  | 5.793 | 7.72e-4 |
| Biological | motility                      |                       |     |       |         |
| Process    |                               |                       |     |       |         |
| Gene       | cell projection               |                       |     |       |         |
| Ontology - | morphogenesis                 | predicted (union)     | 250 | 197.6 | 8.06e-4 |
| Biological |                               |                       |     |       |         |
| Process    |                               |                       |     |       |         |
| Gene       | regulation of interleukin-23  |                       |     |       |         |
| Ontology - |                               | experimental (any)    | 3   | 0.093 | 8.09e-4 |
| Biological | production                    |                       |     |       |         |
| Process    |                               |                       |     |       |         |
| Gene       | positive regulation           |                       |     |       |         |
| Ontology - | of cellular                   | experimental (strong) | 34  | 17.99 | 8.12e-4 |
| Biological | biosynthetic process          |                       |     |       |         |
| Process    |                               |                       |     |       |         |
| Gene       | signal transduction by        |                       |     |       |         |
| Ontology - | protein                       | experimental (strong) | 23  | 9.576 | 8.13e-4 |
| Biological | phosphorylation               |                       |     |       |         |
| Process    |                               |                       |     |       |         |

|                                    |                                                                        |                    |     |       |         |
|------------------------------------|------------------------------------------------------------------------|--------------------|-----|-------|---------|
| Gene Ontology - Biological Process | nucleotide-binding oligomerization domain containing signaling pathway | experimental (any) | 5   | 0.452 | 8.26e-4 |
| Gene Ontology - Biological Process | regulation of establishment of protein localization                    | experimental (any) | 21  | 8.238 | 8.26e-4 |
| Gene Ontology - Biological Process | tissue development                                                     | experimental (any) | 39  | 20.81 | 8.27e-4 |
| Gene Ontology - Biological Process | response to drug                                                       | experimental (any) | 25  | 10.83 | 8.32e-4 |
| Gene Ontology - Biological Process | regulation of protein transport                                        | experimental (any) | 20  | 7.64  | 8.46e-4 |
| Gene Ontology - Biological Process | regulation of cytokine-mediated signaling pathway                      | experimental (any) | 9   | 1.807 | 8.52e-4 |
| Gene Ontology - Biological Process | negative regulation of biosynthetic process                            | predicted (union)  | 566 | 487.3 | 8.54e-4 |
| Gene Ontology - Biological Process | positive regulation of RNA biosynthetic process                        | predicted (union)  | 602 | 520.9 | 8.54e-4 |

Gene regulation  
 Ontology - of cell  
 Biological differentia predicted  
 Process tion (union) 682 595.8 8.54e-4

Gene negative  
 Ontology - regulation  
 Biological of cellular predicted  
 Process metabolic process (union) 900 802.4 8.59e-4

Gene positive  
 Ontology - regulation  
 Biological of nucleic acid-  
 Process templated transcripti predicted  
 Process on (union) 601 520.5 8.59e-4

Gene positive  
 Ontology - regulation  
 Biological of immune experimen  
 Process system tal (strong) 22 8.931 8.60e-4

Gene cytoplasm  
 Ontology - ic pattern  
 Biological recognitio  
 Process n receptor signaling experimen  
 Process pathway tal (any) 6 0.731 8.64e-4

Gene regulation  
 Ontology - of peptidyl-  
 Biological tyrosine  
 Process phosphory experimen  
 Process lation tal (any) 11 2.697 8.64e-4

Gene regulation  
 Ontology - of experimen  
 Biological chemotaxi tal  
 Process s (strong) 10 2.091 9.01e-4



|                    |                                                           |                    |     |       |         |
|--------------------|-----------------------------------------------------------|--------------------|-----|-------|---------|
| Gene               | nucleotide-binding domain, leucine rich repeat containing |                    |     |       |         |
| Ontology -         | receptor                                                  |                    |     |       |         |
| Biological Process | signaling pathway                                         | experimental (any) | 5   | 0.465 | 9.05e-4 |
| Gene               | positive regulation of myeloid cell                       |                    |     |       |         |
| Ontology -         | cell                                                      |                    |     |       |         |
| Biological Process | differentiation                                           | experimental (any) | 7   | 1.063 | 9.05e-4 |
| Gene               | regulation of cell activation                             |                    |     |       |         |
| Ontology -         | regulation of cell activation                             |                    |     |       |         |
| Biological Process | of cell activation                                        | experimental (any) | 17  | 5.899 | 9.05e-4 |
| Gene               | response to vitamin D                                     |                    |     |       |         |
| Ontology -         | response to vitamin D                                     |                    |     |       |         |
| Biological Process | to vitamin D                                              | experimental (any) | 5   | 0.465 | 9.05e-4 |
| Gene               | semi-lunar valve development                              |                    |     |       |         |
| Ontology -         | valve development                                         |                    |     |       |         |
| Biological Process | development                                               | experimental (any) | 5   | 0.465 | 9.05e-4 |
| Gene               | intracellular transport                                   |                    |     |       |         |
| Ontology -         | intracellular transport                                   |                    |     |       |         |
| Biological Process | ar transport                                              | predicted (union)  | 621 | 539.6 | 9.07e-4 |
| Gene               | locomotion                                                |                    |     |       |         |
| Ontology -         | locomotion                                                |                    |     |       |         |
| Biological Process | locomotion                                                | experimental (any) | 36  | 18.71 | 9.10e-4 |
| Gene               | positive regulation of transcription by RNA polymerase II |                    |     |       |         |
| Ontology -         | RNA polymerase II                                         |                    |     |       |         |
| Biological Process | polymerase II                                             | experimental (any) | 27  | 12.28 | 9.10e-4 |

|                                             |                                                                                    |                                 |     |       |         |
|---------------------------------------------|------------------------------------------------------------------------------------|---------------------------------|-----|-------|---------|
| Gene<br>Ontology -<br>Biological<br>Process | response<br>to alcohol                                                             | experimen<br>tal (any)          | 11  | 2.724 | 9.10e-4 |
| Gene<br>Ontology -<br>Biological<br>Process | positive<br>regulation<br>of cellular<br>componen<br>t                             | experimen<br>tal (any)          | 17  | 5.913 | 9.11e-4 |
| Gene<br>Ontology -<br>Biological<br>Process | heart<br>valve<br>developm<br>ent                                                  | experimen<br>tal (any)          | 6   | 0.744 | 9.13e-4 |
| Gene<br>Ontology -<br>Biological<br>Process | positive<br>regulation<br>of reactive<br>oxygen<br>species<br>metabolic<br>process | experimen<br>tal (any)          | 7   | 1.076 | 9.46e-4 |
| Gene<br>Ontology -<br>Biological<br>Process | positive<br>regulation<br>of smooth<br>muscle<br>cell<br>proliferatio<br>n         | experimen<br>tal (any)          | 7   | 1.076 | 9.46e-4 |
| Gene<br>Ontology -<br>Biological<br>Process | response<br>to<br>interferon-<br>alpha                                             | experimen<br>tal (any)          | 4   | 0.252 | 9.47e-4 |
| Gene<br>Ontology -<br>Biological<br>Process | monocyte<br>chemotaxi<br>s                                                         | experimen<br>tal (any)          | 5   | 0.478 | 9.99e-4 |
| Gene<br>Ontology -<br>Biological<br>Process | anatomica<br>l structure<br>morphoge<br>nesis                                      | predicted<br>(intersecti<br>on) | 467 | 390.6 | 0.001   |

|            |                     |             |     |       |       |
|------------|---------------------|-------------|-----|-------|-------|
| Gene       | negative regulation |             |     |       |       |
| Ontology - | of gene             | predicted   |     |       |       |
| Biological | expressio           | (intersecti |     |       |       |
| Process    | n                   | on)         | 332 | 266.2 | 0.001 |
| Gene       |                     |             |     |       |       |
| Ontology - | axonogen            | predicted   |     |       |       |
| Biological | esis                | (union)     | 179 | 137.1 | 0.001 |
| Process    |                     |             |     |       |       |
| Gene       |                     |             |     |       |       |
| Ontology - | cell part           |             |     |       |       |
| Biological | morphoge            | predicted   |     |       |       |
| Process    | nesis               | (union)     | 254 | 203.4 | 0.001 |
| Gene       |                     |             |     |       |       |
| Ontology - | neuron              |             |     |       |       |
| Biological | projection          |             |     |       |       |
| Process    | morphoge            | predicted   |     |       |       |
|            | nesis               | (union)     | 240 | 190.9 | 0.001 |
| Gene       |                     |             |     |       |       |
| Ontology - | positive            |             |     |       |       |
| Biological | regulation          |             |     |       |       |
| Process    | of gene             | predicted   |     |       |       |
|            | expressio           | (union)     | 716 | 629.8 | 0.001 |
| Gene       |                     |             |     |       |       |
| Ontology - | positive            |             |     |       |       |
| Biological | regulation          |             |     |       |       |
| Process    | of                  |             |     |       |       |
|            | transcripti         |             |     |       |       |
|            | on, DNA-            | predicted   |     |       |       |
|            | templated           | (union)     | 561 | 484.9 | 0.001 |
| Gene       |                     |             |     |       |       |
| Ontology - | NIK/NF-             | experimen   |     |       |       |
| Biological | kappaB              | tal         |     |       |       |
| Process    | signaling           | (strong)    | 9   | 1.729 | 0.001 |
| Gene       |                     |             |     |       |       |
| Ontology - |                     | experimen   |     |       |       |
| Biological | cell                | tal         |     |       |       |
| Process    | activation          | (strong)    | 26  | 11.95 | 0.001 |
| Gene       |                     |             |     |       |       |
| Ontology - | cellular            |             |     |       |       |
| Biological | protein             |             |     |       |       |
| Process    | modificati          | experimen   |     |       |       |
|            | on                  | tal         |     |       |       |
|            | process             | (strong)    | 45  | 28.44 | 0.001 |
| Gene       |                     |             |     |       |       |
| Ontology - |                     | experimen   |     |       |       |
| Biological | leukocyte           | tal         |     |       |       |
| Process    | activation          | (strong)    | 24  | 10.51 | 0.001 |

|            |             |           |    |       |       |
|------------|-------------|-----------|----|-------|-------|
| Gene       |             |           |    |       |       |
| Ontology - | neutrophil  | experimen |    |       |       |
| Biological | activation  | tal       |    |       |       |
| Process    |             | (strong)  | 12 | 3.149 | 0.001 |
| Gene       | positive    |           |    |       |       |
| Ontology - | regulation  | experimen |    |       |       |
| Biological | of MAPK     | tal       |    |       |       |
| Process    | cascade     | (strong)  | 17 | 6.014 | 0.001 |
| Gene       | protein     |           |    |       |       |
| Ontology - | modificati  | experimen |    |       |       |
| Biological | on          | tal       |    |       |       |
| Process    | process     | (strong)  | 45 | 28.44 | 0.001 |
| Gene       |             |           |    |       |       |
| Ontology - | regulation  | experimen |    |       |       |
| Biological | of immune   | tal       |    |       |       |
| Process    | response    | (strong)  | 20 | 7.795 | 0.001 |
| Gene       |             |           |    |       |       |
| Ontology - | regulation  | experimen |    |       |       |
| Biological | of          | tal       |    |       |       |
| Process    | signaling   | (strong)  | 45 | 28.44 | 0.001 |
| Gene       |             |           |    |       |       |
| Ontology - | response    | experimen |    |       |       |
| Biological | to lipid    | tal       |    |       |       |
| Process    |             | (strong)  | 23 | 9.912 | 0.001 |
| Gene       |             |           |    |       |       |
| Ontology - | NIK/NF-     | experimen |    |       |       |
| Biological | kappaB      | tal       |    |       |       |
| Process    | signaling   | (any)     | 9  | 1.98  | 0.001 |
| Gene       |             |           |    |       |       |
| Ontology - | T cell      |           |    |       |       |
| Biological | differentia | experimen |    |       |       |
| Process    | tion        | tal (any) | 11 | 2.777 | 0.001 |
|            | anatomica   |           |    |       |       |
|            | l structure |           |    |       |       |
| Gene       | formation   |           |    |       |       |
| Ontology - | involved in |           |    |       |       |
| Biological | morphoge    | experimen |    |       |       |
| Process    | nesis       | tal (any) | 26 | 11.95 | 0.001 |
| Gene       | blood       |           |    |       |       |
| Ontology - | vessel      |           |    |       |       |
| Biological | morphoge    | experimen |    |       |       |
| Process    | nesis       | tal (any) | 18 | 6.644 | 0.001 |

|                    |                                                  |                    |    |       |       |
|--------------------|--------------------------------------------------|--------------------|----|-------|-------|
| Gene               | cellular response                                |                    |    |       |       |
| Ontology -         | to                                               |                    |    |       |       |
| Biological Process | hormone stimulus                                 | experimental (any) | 19 | 7.454 | 0.001 |
| Gene               | chemokine                                        |                    |    |       |       |
| Ontology -         | e-mediated                                       |                    |    |       |       |
| Biological Process | signaling pathway                                | experimental (any) | 5  | 0.531 | 0.001 |
| Gene               | cytokine production                              |                    |    |       |       |
| Ontology -         | involved in                                      |                    |    |       |       |
| Biological Process | immune response                                  | experimental (any) | 7  | 1.183 | 0.001 |
| Gene               |                                                  |                    |    |       |       |
| Ontology -         |                                                  |                    |    |       |       |
| Biological Process | entry into host cell                             | experimental (any) | 8  | 1.528 | 0.001 |
| Gene               |                                                  |                    |    |       |       |
| Ontology -         | forebrain                                        |                    |    |       |       |
| Biological Process | development                                      | experimental (any) | 14 | 4.292 | 0.001 |
| Gene               | innate immune response-activating                |                    |    |       |       |
| Ontology -         | signal                                           |                    |    |       |       |
| Biological Process | transduction                                     | experimental (any) | 12 | 3.362 | 0.001 |
| Gene               |                                                  |                    |    |       |       |
| Ontology -         | mononuclear cell                                 |                    |    |       |       |
| Biological Process | migration                                        | experimental (any) | 6  | 0.771 | 0.001 |
| Gene               | negative regulation                              |                    |    |       |       |
| Ontology -         | of cell                                          |                    |    |       |       |
| Biological Process | migration                                        | experimental (any) | 11 | 2.817 | 0.001 |
| Gene               | negative regulation of interleukin-23 production |                    |    |       |       |
| Ontology -         |                                                  |                    |    |       |       |
| Biological Process |                                                  | experimental (any) | 2  | 0.027 | 0.001 |

|      |                                                    |                    |     |       |       |
|------|----------------------------------------------------|--------------------|-----|-------|-------|
| Gene | negative regulation of leukocyte apoptotic process | experimental (any) | 5   | 0.531 | 0.001 |
| Gene | nitric oxide biosynthetic process                  | experimental (any) | 6   | 0.824 | 0.001 |
| Gene | osteoclast differentiation                         | experimental (any) | 7   | 1.143 | 0.001 |
| Gene | positive regulation of T cell migration            | experimental (any) | 4   | 0.292 | 0.001 |
| Gene | positive regulation of kinase activity             | experimental (any) | 17  | 6.205 | 0.001 |
| Gene | positive regulation of locomotion                  | experimental (any) | 17  | 6.152 | 0.001 |
| Gene | positive regulation of secretion                   | experimental (any) | 14  | 4.478 | 0.001 |
| Gene | regulation of MAP kinase activity                  | experimental (any) | 13  | 3.8   | 0.001 |
| Gene | regulation of angiogenesis                         | experimental (any) | 12  | 3.282 | 0.001 |
| Gene | regulation of cellular process                     | experimental (any) | 134 | 108.2 | 0.001 |

|                                    |                                                        |                    |    |       |       |
|------------------------------------|--------------------------------------------------------|--------------------|----|-------|-------|
| Gene Ontology - Biological Process | regulation of epithelial cell proliferation            | experimental (any) | 13 | 3.827 | 0.001 |
| Gene Ontology - Biological Process | regulation of innate immune response                   | experimental (any) | 15 | 4.929 | 0.001 |
| Gene Ontology - Biological Process | regulation of leukocyte proliferation                  | experimental (any) | 10 | 2.352 | 0.001 |
| Gene Ontology - Biological Process | regulation of osteoclast differentiation               | experimental (any) | 6  | 0.784 | 0.001 |
| Gene Ontology - Biological Process | regulation of protein serine/threonine kinase activity | experimental (any) | 16 | 5.581 | 0.001 |
| Gene Ontology - Biological Process | regulation of type I interferon production             | experimental (any) | 8  | 1.475 | 0.001 |
| Gene Ontology - Biological Process | response to estradiol                                  | experimental (any) | 8  | 1.501 | 0.001 |
| Gene Ontology - Biological Process | response to hydroxyisoflavone                          | experimental (any) | 2  | 0.027 | 0.001 |
| Gene Ontology - Biological Process | response to ultrasound                                 | experimental (any) | 2  | 0.027 | 0.001 |

|                                             |                                                               |                                 |     |       |       |
|---------------------------------------------|---------------------------------------------------------------|---------------------------------|-----|-------|-------|
| Gene<br>Ontology -<br>Biological<br>Process | response<br>to vitamin                                        | experimen<br>tal (any)          | 7   | 1.156 | 0.001 |
| Gene<br>Ontology -<br>Biological<br>Process | stem cell<br>population<br>maintenan<br>ce                    | experimen<br>tal (any)          | 9   | 1.98  | 0.001 |
| Gene<br>Ontology -<br>Biological<br>Process | system<br>developm<br>ent                                     | experimen<br>tal (any)          | 73  | 49.77 | 0.001 |
| Gene<br>Ontology -<br>Biological<br>Process | telenceph<br>alon<br>developm<br>ent                          | experimen<br>tal (any)          | 11  | 2.883 | 0.001 |
| Gene<br>Ontology -<br>Biological<br>Process | tissue<br>remodelin<br>g                                      | experimen<br>tal (any)          | 9   | 1.873 | 0.001 |
| Gene<br>Ontology -<br>Biological<br>Process | toll-like<br>receptor 9<br>signaling<br>pathway               | experimen<br>tal (any)          | 4   | 0.292 | 0.001 |
| Gene<br>Ontology -<br>Biological<br>Process | type I<br>interferon<br>biosynthes<br>is process              | experimen<br>tal (any)          | 3   | 0.120 | 0.001 |
| Gene<br>Ontology -<br>Biological<br>Process | type I<br>interferon<br>production                            | experimen<br>tal (any)          | 8   | 1.501 | 0.001 |
| Gene<br>Ontology -<br>Biological<br>Process | nervous<br>system<br>developm<br>ent                          | predicted<br>(intersecti<br>on) | 426 | 353.2 | 0.002 |
| Gene<br>Ontology -<br>Biological<br>Process | central<br>nervous<br>system<br>neuron<br>differentia<br>tion | predicted<br>(union)            | 91  | 62.86 | 0.002 |



|            |                             |                     |     |       |       |
|------------|-----------------------------|---------------------|-----|-------|-------|
| Gene       | regulation of               |                     |     |       |       |
| Ontology - | organelle                   |                     |     |       |       |
| Biological | organization                | predicted (union)   | 470 | 402.2 | 0.002 |
| Process    |                             |                     |     |       |       |
| Gene       |                             |                     |     |       |       |
| Ontology - | cellular                    | experimental        |     |       |       |
| Biological | response to lipid           | (strong)            | 18  | 6.84  | 0.002 |
| Process    |                             |                     |     |       |       |
| Gene       | positive regulation of cell |                     |     |       |       |
| Ontology - | population                  | experimental        |     |       |       |
| Biological | proliferation               | (strong)            | 23  | 10.43 | 0.002 |
| Process    |                             |                     |     |       |       |
| Gene       | positive regulation of      | experimental        |     |       |       |
| Ontology - | cytokine                    | production (strong) | 14  | 4.465 | 0.002 |
| Biological |                             |                     |     |       |       |
| Process    |                             |                     |     |       |       |
| Gene       | reactive oxygen             |                     |     |       |       |
| Ontology - | species                     | experimental        |     |       |       |
| Biological | metabolic process           | (strong)            | 11  | 2.865 | 0.002 |
| Process    |                             |                     |     |       |       |
| Gene       |                             |                     |     |       |       |
| Ontology - | regulation of MAPK          | experimental        |     |       |       |
| Biological | cascade                     | (strong)            | 20  | 8.027 | 0.002 |
| Process    |                             |                     |     |       |       |
| Gene       | regulation of cellular      | experimental        |     |       |       |
| Ontology - | extravasation               | (strong)            | 3   | 0.103 | 0.002 |
| Biological |                             |                     |     |       |       |
| Process    |                             |                     |     |       |       |
| Gene       |                             |                     |     |       |       |
| Ontology - |                             | experimental        |     |       |       |
| Biological | secretion                   | (strong)            | 25  | 11.9  | 0.002 |
| Process    |                             |                     |     |       |       |
| Gene       |                             |                     |     |       |       |
| Ontology - | RNA                         |                     |     |       |       |
| Biological | metabolic process           | experimental (any)  | 73  | 50.57 | 0.002 |
| Process    |                             |                     |     |       |       |
| Gene       |                             |                     |     |       |       |
| Ontology - | T cell                      | experimental        |     |       |       |
| Biological | migration                   | (any)               | 5   | 0.611 | 0.002 |
| Process    |                             |                     |     |       |       |

|                       |                            |                    |    |       |       |
|-----------------------|----------------------------|--------------------|----|-------|-------|
| Gene                  |                            |                    |    |       |       |
| Ontology - activation |                            |                    |    |       |       |
| Biological Process    | of immune response         | experimental (any) | 17 | 6.497 | 0.002 |
| Gene                  | activation                 |                    |    |       |       |
| Ontology - of innate  |                            |                    |    |       |       |
| Biological Process    | immune response            | experimental (any) | 12 | 3.627 | 0.002 |
| Gene                  |                            |                    |    |       |       |
| Ontology -            |                            |                    |    |       |       |
| Biological Process    | biosynthetic process       | experimental (any) | 92 | 67.59 | 0.002 |
| Gene                  | cardiac                    |                    |    |       |       |
| Ontology - septum     |                            |                    |    |       |       |
| Biological Process    | morphogenesis              | experimental (any) | 6  | 0.943 | 0.002 |
| Gene                  |                            |                    |    |       |       |
| Ontology - cellular   |                            |                    |    |       |       |
| Biological Process    | response to drug           | experimental (any) | 13 | 4.119 | 0.002 |
| Gene                  | cellular response          |                    |    |       |       |
| Ontology - to growth  |                            |                    |    |       |       |
| Biological Process    | factor stimulus            | experimental (any) | 19 | 7.706 | 0.002 |
| Gene                  | central nervous            |                    |    |       |       |
| Ontology - system     |                            |                    |    |       |       |
| Biological Process    | development                | experimental (any) | 24 | 10.84 | 0.002 |
| Gene                  |                            |                    |    |       |       |
| Ontology - endoderm   |                            |                    |    |       |       |
| Biological Process    | development                | experimental (any) | 6  | 0.917 | 0.002 |
| Gene                  | extrinsic                  |                    |    |       |       |
| Ontology - apoptotic  |                            |                    |    |       |       |
| Biological Process    | signaling pathway          | experimental (any) | 10 | 2.657 | 0.002 |
| Gene                  |                            |                    |    |       |       |
| Ontology - glial cell |                            |                    |    |       |       |
| Biological Process    | differentiation            | experimental (any) | 10 | 2.538 | 0.002 |
| Gene                  | immune response-activating |                    |    |       |       |
| Ontology - signal     |                            |                    |    |       |       |
| Biological Process    | transduction               | experimental (any) | 16 | 5.727 | 0.002 |

|                               |                                      |                    |    |       |       |
|-------------------------------|--------------------------------------|--------------------|----|-------|-------|
| Gene                          |                                      |                    |    |       |       |
| Ontology - Biological Process | interferon-alpha production          | experimental (any) | 4  | 0.332 | 0.002 |
| Gene                          | negative                             |                    |    |       |       |
| Ontology - Biological Process | regulation of cell motility          | experimental (any) | 11 | 2.976 | 0.002 |
| Gene                          | negative                             |                    |    |       |       |
| Ontology - Biological Process | regulation of signaling              | experimental (any) | 30 | 15.31 | 0.002 |
| Gene                          | negative                             |                    |    |       |       |
| Ontology - Biological Process | regulation of transport              | experimental (any) | 15 | 5.155 | 0.002 |
| Gene                          |                                      |                    |    |       |       |
| Ontology - Biological Process | neutrophil mediated immunity         | experimental (any) | 16 | 5.767 | 0.002 |
| Gene                          | positive regulation                  |                    |    |       |       |
| Ontology - Biological Process | of MAP kinase activity               | experimental (any) | 11 | 2.976 | 0.002 |
| Gene                          | positive regulation of epithelial to |                    |    |       |       |
| Ontology - Biological Process | mesenchymal transition               | experimental (any) | 5  | 0.611 | 0.002 |
| Gene                          | positive regulation                  |                    |    |       |       |
| Ontology - Biological Process | of gliogenesis                       | experimental (any) | 6  | 0.850 | 0.002 |
| Gene                          | positive regulation                  |                    |    |       |       |
| Ontology - Biological Process | of innate immune response            | experimental (any) | 13 | 4.199 | 0.002 |

Gene Ontology - Biological Process  
 positive regulation of interleukin-6 production experimental (any) 6 0.890 0.002

Gene Ontology - Biological Process  
 positive regulation of protein complex assembly experimental (any) 10 2.618 0.002

Gene Ontology - Biological Process  
 positive regulation of reactive oxygen species biosynthetic process experimental (any) 5 0.585 0.002

Gene Ontology - Biological Process  
 positive regulation of type I interferon production experimental (any) 6 0.890 0.002

Gene Ontology - Biological Process  
 positive regulation of endothelial growth factor production experimental (any) 4 0.332 0.002

Gene Ontology - Biological Process  
 positive regulation of vasoconstriction experimental (any) 4 0.319 0.002

Gene Ontology - Biological Process  
 proteolysis experimental (any) 33 17.54 0.002

|                                    |                                               |                             |                    |       |       |       |
|------------------------------------|-----------------------------------------------|-----------------------------|--------------------|-------|-------|-------|
| Gene Ontology - Biological Process | regulation of ERK1 and ERK2 cascade           | experimental (any)          | 11                 | 2.976 | 0.002 |       |
| Gene Ontology - Biological Process | regulation of T cell proliferation            | experimental (any)          | 8                  | 1.674 | 0.002 |       |
| Gene Ontology - Biological Process | regulation of actin cytoskeleton organization | experimental (any)          | 12                 | 3.468 | 0.002 |       |
| Gene Ontology - Biological Process | regulation of calcium ion transport           | experimental (any)          | 10                 | 2.618 | 0.002 |       |
| Gene Ontology - Biological Process | regulation of cytokine production             | involved in immune response | experimental (any) | 6     | 0.943 | 0.002 |
| Gene Ontology - Biological Process | regulation of gene expression                 | experimental (any)          | 71                 | 48.79 | 0.002 |       |
| Gene Ontology - Biological Process | regulation of metabolic process               | experimental (any)          | 95                 | 70.99 | 0.002 |       |
| Gene Ontology - Biological Process | regulation of protein kinase activity         | experimental (any)          | 20                 | 8.344 | 0.002 |       |

|            |              |           |     |       |       |
|------------|--------------|-----------|-----|-------|-------|
| Gene       | regulation   |           |     |       |       |
| Ontology - | of tissue    |           |     |       |       |
| Biological | remodelin    | experimen |     |       |       |
| Process    | g            | tal (any) | 6   | 0.877 | 0.002 |
| Gene       |              |           |     |       |       |
| Ontology - | tube         |           |     |       |       |
| Biological | developm     | experimen |     |       |       |
| Process    | ent          | tal (any) | 25  | 11.64 | 0.002 |
|            | negative     |           |     |       |       |
|            | regulation   |           |     |       |       |
| Gene       | of           |           |     |       |       |
| Ontology - | transcripti  |           |     |       |       |
| Biological | on, DNA-     | predicted |     |       |       |
| Process    | templated    | (union)   | 430 | 367   | 0.003 |
|            | MyD88-       |           |     |       |       |
|            | dependen     |           |     |       |       |
| Gene       | t toll-like  |           |     |       |       |
| Ontology - | receptor     | experimen |     |       |       |
| Biological | signaling    | tal       |     |       |       |
| Process    | pathway      | (strong)  | 5   | 0.516 | 0.003 |
|            | activation   |           |     |       |       |
|            | of NF-       |           |     |       |       |
| Gene       | kappaB-      |           |     |       |       |
| Ontology - | inducing     | experimen |     |       |       |
| Biological | kinase       | tal       |     |       |       |
| Process    | activity     | (strong)  | 4   | 0.310 | 0.003 |
| Gene       |              |           |     |       |       |
| Ontology - |              | experimen |     |       |       |
| Biological | cell         | tal       |     |       |       |
| Process    | adhesion     | (strong)  | 24  | 11.56 | 0.003 |
|            | cellular     |           |     |       |       |
| Gene       | macromol     |           |     |       |       |
| Ontology - | ecule        | experimen |     |       |       |
| Biological | biosynthesi  | tal       |     |       |       |
| Process    | c process    | (strong)  | 45  | 29.79 | 0.003 |
|            | cellular     |           |     |       |       |
| Gene       | response     |           |     |       |       |
| Ontology - | to           | experimen |     |       |       |
| Biological | interleukin- | tal       |     |       |       |
| Process    | 6            | (strong)  | 5   | 0.568 | 0.003 |
|            |              |           |     |       |       |
| Gene       | cellular     |           |     |       |       |
| Ontology - | response     | experimen |     |       |       |
| Biological | to organic   | tal       |     |       |       |
| Process    | substance    | (strong)  | 40  | 24.65 | 0.003 |



|            |              |           |    |       |       |
|------------|--------------|-----------|----|-------|-------|
| Gene       | regulation   |           |    |       |       |
| Ontology - | of calcium   | experimen |    |       |       |
| Biological | ion          | tal       |    |       |       |
| Process    | transport    | (strong)  | 9  | 1.962 | 0.003 |
| Gene       |              |           |    |       |       |
| Ontology - | regulation   | experimen |    |       |       |
| Biological | of cell      | tal       |    |       |       |
| Process    | motility     | (strong)  | 22 | 9.757 | 0.003 |
| Gene       |              |           |    |       |       |
| Ontology - | regulation   | experimen |    |       |       |
| Biological | of cell-cell | tal       |    |       |       |
| Process    | adhesion     | (strong)  | 14 | 4.646 | 0.003 |
| Gene       |              |           |    |       |       |
| Ontology - | regulation   | experimen |    |       |       |
| Biological | of immune    | tal       |    |       |       |
| Process    | system       | (strong)  | 26 | 12.83 | 0.003 |
| Process    | process      |           |    |       |       |
| Gene       | regulation   |           |    |       |       |
| Ontology - | of           |           |    |       |       |
| Biological | interleukin- | experimen |    |       |       |
| Process    | 12           | tal       |    |       |       |
| Process    | biosynthetic | (strong)  | 3  | 0.129 | 0.003 |
| Process    | process      |           |    |       |       |
| Gene       | regulation   |           |    |       |       |
| Ontology - | of           |           |    |       |       |
| Biological | nitrogen     | experimen |    |       |       |
| Process    | compound     | tal       |    |       |       |
| Process    | metabolic    | (strong)  | 54 | 38.77 | 0.003 |
| Process    | process      |           |    |       |       |
| Gene       | regulation   |           |    |       |       |
| Ontology - | of           |           |    |       |       |
| Biological | programm     | experimen |    |       |       |
| Process    | ed cell      | tal       |    |       |       |
| Process    | death        | (strong)  | 31 | 16.73 | 0.003 |
| Process    |              |           |    |       |       |
| Gene       |              |           |    |       |       |
| Ontology - | ERK1 and     |           |    |       |       |
| Biological | ERK2         | experimen |    |       |       |
| Process    | cascade      | tal (any) | 11 | 3.215 | 0.003 |
| Process    |              |           |    |       |       |
| Gene       | MyD88-       |           |    |       |       |
| Ontology - | independe    |           |    |       |       |
| Biological | nt toll-like |           |    |       |       |
| Process    | receptor     | experimen |    |       |       |
| Process    | signaling    | tal (any) | 4  | 0.385 | 0.003 |
| Process    | pathway      |           |    |       |       |



|                    |                                                                                                       |                    |    |       |       |
|--------------------|-------------------------------------------------------------------------------------------------------|--------------------|----|-------|-------|
| Gene               | Ras protein                                                                                           |                    |    |       |       |
| Ontology -         | signal                                                                                                |                    |    |       |       |
| Biological Process | transduction                                                                                          | experimental (any) | 12 | 3.84  | 0.003 |
| Gene               | adaptive immune response based on somatic recombination of immune receptors built from immunoglobulin |                    |    |       |       |
| Ontology -         | obulin                                                                                                |                    |    |       |       |
| Biological Process | superfamily domains                                                                                   | experimental (any) | 10 | 2.764 | 0.003 |
| Gene               | aortic valve                                                                                          |                    |    |       |       |
| Ontology -         | valve                                                                                                 |                    |    |       |       |
| Biological Process | morphogenesis                                                                                         | experimental (any) | 4  | 0.359 | 0.003 |
| Gene               | biomineral                                                                                            |                    |    |       |       |
| Ontology -         | tissue                                                                                                |                    |    |       |       |
| Biological Process | development                                                                                           | experimental (any) | 8  | 1.807 | 0.003 |
| Gene               | body fluid                                                                                            |                    |    |       |       |
| Ontology -         | secretion                                                                                             |                    |    |       |       |
| Biological Process | secretion                                                                                             | experimental (any) | 6  | 1.023 | 0.003 |
| Gene               | cell cycle                                                                                            |                    |    |       |       |
| Ontology -         | arrest                                                                                                |                    |    |       |       |
| Biological Process | arrest                                                                                                | experimental (any) | 10 | 2.737 | 0.003 |
| Gene               | cell migration involved in sprouting                                                                  |                    |    |       |       |
| Ontology -         | sprouting                                                                                             |                    |    |       |       |
| Biological Process | angiogenesis                                                                                          | experimental (any) | 5  | 0.651 | 0.003 |
| Gene               | cellular                                                                                              |                    |    |       |       |
| Ontology -         | extravasation                                                                                         |                    |    |       |       |
| Biological Process | extravasation                                                                                         | experimental (any) | 5  | 0.624 | 0.003 |

|                    |                                             |                    |    |       |       |
|--------------------|---------------------------------------------|--------------------|----|-------|-------|
| Gene               | chemokine (C-X-C motif) ligand 12           |                    |    |       |       |
| Biological Process | signaling pathway                           | experimental (any) | 2  | 0.040 | 0.003 |
| Gene               | endothelium                                 |                    |    |       |       |
| Biological Process | development                                 | experimental (any) | 7  | 1.342 | 0.003 |
| Biological Process | proliferation                               | experimental (any) | 13 | 4.478 | 0.003 |
| Biological Process | proliferation                               | experimental (any) | 6  | 1.023 | 0.003 |
| Biological Process | gliogenesis                                 | experimental (any) | 11 | 3.348 | 0.003 |
| Biological Process | interferon-gamma-mediated signaling pathway | experimental (any) | 6  | 1.023 | 0.003 |
| Biological Process | interleukin-12 production                   | experimental (any) | 5  | 0.651 | 0.003 |
| Biological Process | leukocyte homeostasis                       | experimental (any) | 6  | 0.983 | 0.003 |
| Biological Process | leukocyte homeostasis                       | experimental (any) | 5  | 0.678 | 0.003 |
| Biological Process | proliferation                               | experimental (any) | 10 | 2.764 | 0.003 |
| Biological Process | macrophage activation                       | experimental (any) | 6  | 0.997 | 0.003 |

|            |                                              |           |    |       |       |
|------------|----------------------------------------------|-----------|----|-------|-------|
| Gene       | maintenan<br>ce of                           |           |    |       |       |
| Ontology - | permeabili<br>ty of blood-                   |           |    |       |       |
| Biological | brain                                        | experimen |    |       |       |
| Process    | barrier                                      | tal (any) | 2  | 0.040 | 0.003 |
| Gene       | mononucl                                     |           |    |       |       |
| Ontology - | ear cell                                     |           |    |       |       |
| Biological | proliferatio                                 | experimen |    |       |       |
| Process    | n                                            | tal (any) | 10 | 2.79  | 0.003 |
| Gene       | muscle                                       |           |    |       |       |
| Ontology - | cell                                         |           |    |       |       |
| Biological | proliferatio                                 | experimen |    |       |       |
| Process    | n                                            | tal (any) | 9  | 2.299 | 0.003 |
| Gene       | negative<br>regulation<br>of blood<br>vessel |           |    |       |       |
| Ontology - | endothelia                                   |           |    |       |       |
| Biological | l cell                                       | experimen |    |       |       |
| Process    | migration                                    | tal (any) | 4  | 0.372 | 0.003 |
| Gene       | negative<br>regulation<br>of cellular        |           |    |       |       |
| Ontology - | componen                                     |           |    |       |       |
| Biological | t                                            | experimen |    |       |       |
| Process    | movement                                     | tal (any) | 11 | 3.202 | 0.003 |
| Gene       | negative<br>regulation                       |           |    |       |       |
| Ontology - | of growth                                    |           |    |       |       |
| Biological | rate                                         | experimen |    |       |       |
| Process    |                                              | tal (any) | 2  | 0.040 | 0.003 |
| Gene       | negative<br>regulation                       |           |    |       |       |
| Ontology - | of                                           |           |    |       |       |
| Biological | locomotio                                    | experimen |    |       |       |
| Process    | n                                            | tal (any) | 11 | 3.335 | 0.003 |
| Gene       | negative<br>regulation                       |           |    |       |       |
| Ontology - | of                                           |           |    |       |       |
| Biological | serotonin                                    | experimen |    |       |       |
| Process    | uptake                                       | tal (any) | 2  | 0.040 | 0.003 |

neutrophil  
 activation  
 Gene Ontology - involved in  
 Biological Process immune response experimental (any) 15 5.634 0.003

neutrophil  
 degranulation  
 Gene Ontology - neutrophil  
 Biological Process degranulation experimental (any) 15 5.607 0.003

nucleobase-  
 containing  
 Gene Ontology - compound  
 Biological Process metabolic process experimental (any) 84 61.56 0.003

ossification  
 Gene Ontology -  
 Biological Process ossification experimental (any) 13 4.478 0.003

outflow  
 tract  
 Gene Ontology - septum  
 Biological Process morphogenesis experimental (any) 4 0.359 0.003

positive  
 regulation  
 of cellular  
 response  
 to  
 macrophage colony-  
 stimulating factor  
 Gene Ontology -  
 Biological Process stimulus experimental (any) 2 0.040 0.003

|                                    |                                                                                         |                    |   |       |       |
|------------------------------------|-----------------------------------------------------------------------------------------|--------------------|---|-------|-------|
| Gene Ontology - Biological Process | positive regulation of cytokine production involved in immune response                  | experimental (any) | 5 | 0.624 | 0.003 |
| Gene Ontology - Biological Process | positive regulation of extrinsic apoptotic signaling pathway via death domain receptors | experimental (any) | 3 | 0.159 | 0.003 |
| Gene Ontology - Biological Process | positive regulation of histone acetylation                                              | experimental (any) | 4 | 0.372 | 0.003 |
| Gene Ontology - Biological Process | positive regulation of lymphocyte migration                                             | experimental (any) | 4 | 0.359 | 0.003 |
| Gene Ontology - Biological Process | positive regulation of lymphocyte proliferation                                         | experimental (any) | 7 | 1.369 | 0.003 |
| Gene Ontology - Biological Process | positive regulation of mononuclear cell proliferation                                   | experimental (any) | 7 | 1.382 | 0.003 |

|                               |                                                                               |                    |   |       |       |
|-------------------------------|-------------------------------------------------------------------------------|--------------------|---|-------|-------|
| Gene                          | positive regulation of nitric-oxide synthase                                  |                    |   |       |       |
| Ontology - Biological Process | biosynthetic process                                                          | experimental (any) | 3 | 0.159 | 0.003 |
| Gene                          | positive regulation of nucleotide-binding oligomerization domain containing 2 |                    |   |       |       |
| Ontology - Biological Process | signaling pathway                                                             | experimental (any) | 2 | 0.040 | 0.003 |
| Gene                          | positive regulation of response to cytokine stimulus                          |                    |   |       |       |
| Ontology - Biological Process | regulation of response to cytokine stimulus                                   | experimental (any) | 5 | 0.638 | 0.003 |
| Gene                          | extrinsic apoptotic signaling pathway                                         |                    |   |       |       |
| Ontology - Biological Process | regulation of signaling pathway                                               | experimental (any) | 8 | 1.847 | 0.003 |
| Gene                          | regulation of fibroblast proliferation                                        |                    |   |       |       |
| Ontology - Biological Process | proliferation                                                                 | experimental (any) | 6 | 1.01  | 0.003 |
| Gene                          | regulation of interleukin-12 production                                       |                    |   |       |       |
| Ontology - Biological Process | production                                                                    | experimental (any) | 5 | 0.624 | 0.003 |

|                               |                                                       |                    |     |       |       |
|-------------------------------|-------------------------------------------------------|--------------------|-----|-------|-------|
| Gene                          | regulation of vascular endothelia                     |                    |     |       |       |
| Ontology - Biological Process | factor production                                     | experimental (any) | 4   | 0.385 | 0.003 |
| Gene                          | response                                              |                    |     |       |       |
| Ontology - Biological Process | phenylpropanoid                                       | experimental (any) | 2   | 0.040 | 0.003 |
| Gene                          | stress-activated protein kinase                       |                    |     |       |       |
| Ontology - Biological Process | signaling cascade                                     | experimental (any) | 11  | 3.255 | 0.003 |
| Gene                          |                                                       |                    |     |       |       |
| Ontology - Biological Process | telencephalon cell migration                          | experimental (any) | 5   | 0.664 | 0.003 |
| Gene                          |                                                       |                    |     |       |       |
| Ontology - Biological Process | viral entry into host cell                            | experimental (any) | 7   | 1.382 | 0.003 |
| Gene                          |                                                       |                    |     |       |       |
| Ontology - Biological Process | axon development                                      | predicted (union)  | 193 | 152.3 | 0.004 |
| Gene                          |                                                       |                    |     |       |       |
| Ontology - Biological Process | cell morphogenesis                                    | predicted (union)  | 359 | 302.6 | 0.004 |
| Gene                          |                                                       |                    |     |       |       |
| Ontology - Biological Process | cell morphogenesis involved in neuron differentiation | predicted (union)  | 215 | 171.8 | 0.004 |

|                                             |                                                                                 |                              |     |       |       |
|---------------------------------------------|---------------------------------------------------------------------------------|------------------------------|-----|-------|-------|
| Gene<br>Ontology -<br>Biological<br>Process | negative<br>regulation<br>of nucleic<br>acid-<br>templated<br>transcripti<br>on | predicted<br>(union)         | 451 | 387.7 | 0.004 |
| Gene<br>Ontology -<br>Biological<br>Process | neuron<br>projection<br>developm<br>ent                                         | predicted<br>(union)         | 359 | 303   | 0.004 |
| Gene<br>Ontology -<br>Biological<br>Process | cell cycle<br>arrest<br>cell                                                    | experimen<br>tal<br>(strong) | 10  | 2.607 | 0.004 |
| Gene<br>Ontology -<br>Biological<br>Process | surface<br>receptor<br>signaling<br>pathway<br>cellular                         | experimen<br>tal<br>(strong) | 39  | 24.31 | 0.004 |
| Gene<br>Ontology -<br>Biological<br>Process | response<br>to<br>interleukin-<br>1                                             | experimen<br>tal<br>(strong) | 8   | 1.704 | 0.004 |
| Gene<br>Ontology -<br>Biological<br>Process | immune<br>system<br>process                                                     | experimen<br>tal<br>(strong) | 36  | 21.68 | 0.004 |
| Gene<br>Ontology -<br>Biological<br>Process | neutrophil<br>mediated<br>immunity                                              | experimen<br>tal<br>(strong) | 11  | 3.149 | 0.004 |
| Gene<br>Ontology -<br>Biological<br>Process | positive<br>regulation<br>of immune<br>response                                 | experimen<br>tal<br>(strong) | 16  | 6.195 | 0.004 |
| Gene<br>Ontology -<br>Biological<br>Process | positive<br>regulation<br>of<br>macromol<br>ecule<br>biosynthet<br>ic process   | experimen<br>tal<br>(strong) | 31  | 17.37 | 0.004 |



|            |                     |           |    |       |       |
|------------|---------------------|-----------|----|-------|-------|
| Gene       | positive regulation |           |    |       |       |
| Ontology - | of                  | experimen |    |       |       |
| Biological | vasoconst           | tal       |    |       |       |
| Process    | riktion             | (strong)  | 4  | 0.336 | 0.004 |
| Gene       | reactive oxygen     |           |    |       |       |
| Ontology - | species             | experimen |    |       |       |
| Biological | biosynthet          | tal       |    |       |       |
| Process    | ic process          | (strong)  | 7  | 1.265 | 0.004 |
| Gene       | regulation          |           |    |       |       |
| Ontology - | of                  | experimen |    |       |       |
| Biological | apoptotic           | tal       |    |       |       |
| Process    | process             | (strong)  | 30 | 16.6  | 0.004 |
| Gene       | regulation          |           |    |       |       |
| Ontology - | of cell             | experimen |    |       |       |
| Biological | migration           | tal       |    |       |       |
| Process    |                     | (strong)  | 21 | 9.395 | 0.004 |
| Gene       | response            |           |    |       |       |
| Ontology - | to                  | experimen |    |       |       |
| Biological | glucocorti          | tal       |    |       |       |
| Process    | coid                | (strong)  | 8  | 1.678 | 0.004 |
| Gene       | response            |           |    |       |       |
| Ontology - | to hypoxia          | experimen |    |       |       |
| Biological | response            | tal       |    |       |       |
| Process    |                     | (strong)  | 13 | 4.31  | 0.004 |
| Gene       | response            |           |    |       |       |
| Ontology - | to                  | experimen |    |       |       |
| Biological | organonitr          | tal       |    |       |       |
| Process    | ogen                | (strong)  | 21 | 9.602 | 0.004 |
| Gene       | response            |           |    |       |       |
| Ontology - | to                  | experimen |    |       |       |
| Biological | viral               | tal       |    |       |       |
| Process    | process             | (strong)  | 17 | 6.788 | 0.004 |
| Gene       | SMAD                |           |    |       |       |
| Ontology - | protein             |           |    |       |       |
| Biological | complex             | experimen |    |       |       |
| Process    | assembly            | tal (any) | 3  | 0.173 | 0.004 |
| Gene       | aortic              |           |    |       |       |
| Ontology - | valve               |           |    |       |       |
| Biological | developm            | experimen |    |       |       |
| Process    | ent                 | tal (any) | 4  | 0.412 | 0.004 |

|                            |                                                   |                    |    |       |       |
|----------------------------|---------------------------------------------------|--------------------|----|-------|-------|
| Gene                       |                                                   |                    |    |       |       |
| Ontology - apoptotic       |                                                   |                    |    |       |       |
| Biological Process         | signaling pathway                                 | experimental (any) | 17 | 7.029 | 0.004 |
| Gene                       | blood                                             |                    |    |       |       |
| Ontology - vessel          |                                                   |                    |    |       |       |
| Biological Process         | development                                       | experimental (any) | 18 | 7.613 | 0.004 |
| Gene                       |                                                   |                    |    |       |       |
| Ontology -                 |                                                   |                    |    |       |       |
| Biological Process         | bone resorption                                   | experimental (any) | 5  | 0.691 | 0.004 |
| Gene                       | cellular response to                              |                    |    |       |       |
| Ontology - prostaglandin E |                                                   |                    |    |       |       |
| Biological Process         | stimulus                                          | experimental (any) | 3  | 0.186 | 0.004 |
| Gene                       |                                                   |                    |    |       |       |
| Ontology - forebrain       |                                                   |                    |    |       |       |
| Biological Process         | cell migration                                    | experimental (any) | 5  | 0.704 | 0.004 |
| Gene                       | myeloid                                           |                    |    |       |       |
| Ontology - cell            |                                                   |                    |    |       |       |
| Biological Process         | apoptotic process                                 | experimental (any) | 4  | 0.412 | 0.004 |
| Gene                       | negative regulation of cell migration involved in |                    |    |       |       |
| Ontology - sprouting       |                                                   |                    |    |       |       |
| Biological Process         | angiogenesis                                      | experimental (any) | 3  | 0.173 | 0.004 |
| Gene                       | negative regulation of                            |                    |    |       |       |
| Ontology - of              |                                                   |                    |    |       |       |
| Biological Process         | chemotaxis                                        | experimental (any) | 4  | 0.412 | 0.004 |
| Gene                       | negative regulation of                            |                    |    |       |       |
| Ontology - of              |                                                   |                    |    |       |       |
| Biological Process         | cytokine production                               | experimental (any) | 10 | 2.95  | 0.004 |

|      |                                                      |                    |    |       |       |
|------|------------------------------------------------------|--------------------|----|-------|-------|
| Gene | negative regulation of epithelial cell proliferation | experimental (any) | 7  | 1.462 | 0.004 |
| Gene | neuroinflammatory response                           | experimental (any) | 5  | 0.704 | 0.004 |
| Gene | neurotransmitter biosynthetic process                | experimental (any) | 6  | 1.036 | 0.004 |
| Gene | positive regulation of cellular component biogenesis | experimental (any) | 15 | 5.713 | 0.004 |
| Gene | positive regulation of chemotaxis                    | experimental (any) | 7  | 1.488 | 0.004 |
| Gene | positive regulation of interleukin-12 production     | experimental (any) | 4  | 0.412 | 0.004 |
| Gene | positive regulation of leukocyte proliferation       | experimental (any) | 7  | 1.435 | 0.004 |
| Gene | positive regulation of peptidyl-lysine acetylation   | experimental (any) | 4  | 0.412 | 0.004 |

|                                             |                                                                                        |                        |    |       |       |
|---------------------------------------------|----------------------------------------------------------------------------------------|------------------------|----|-------|-------|
| Gene<br>Ontology -<br>Biological<br>Process | positive<br>regulation<br>of peptidyl-<br>serine<br>phosphorylation                    | experimen<br>tal (any) | 6  | 1.05  | 0.004 |
| Gene<br>Ontology -<br>Biological<br>Process | positive<br>regulation<br>of small<br>GTPase<br>mediated<br>signal<br>transducti<br>on | experimen<br>tal (any) | 5  | 0.718 | 0.004 |
| Gene<br>Ontology -<br>Biological<br>Process | regulation<br>of actin<br>filament-<br>based<br>process                                | experimen<br>tal (any) | 12 | 3.946 | 0.004 |
| Gene<br>Ontology -<br>Biological<br>Process | regulation<br>of cell<br>growth                                                        | experimen<br>tal (any) | 13 | 4.544 | 0.004 |
| Gene<br>Ontology -<br>Biological<br>Process | regulation<br>of<br>epithelial<br>to<br>mesenchy<br>mal<br>transition                  | experimen<br>tal (any) | 6  | 1.036 | 0.004 |
| Gene<br>Ontology -<br>Biological<br>Process | regulation<br>of nitric<br>oxide<br>biosynthes<br>is                                   | experimen<br>tal (any) | 5  | 0.691 | 0.004 |
| Gene<br>Ontology -<br>Biological<br>Process | response<br>to toxic<br>substance                                                      | experimen<br>tal (any) | 15 | 5.727 | 0.004 |
| Gene<br>Ontology -<br>Biological<br>Process | tissue<br>morphoge<br>nesis                                                            | experimen<br>tal (any) | 18 | 7.6   | 0.004 |

|                    |                                               |                        |     |       |       |
|--------------------|-----------------------------------------------|------------------------|-----|-------|-------|
| Gene               | vascular endothelia                           |                        |     |       |       |
| Ontology -         | I growth                                      |                        |     |       |       |
| Biological Process | factor production                             | experimen tal (any)    | 4   | 0.399 | 0.004 |
| Gene               |                                               |                        |     |       |       |
| Ontology -         |                                               |                        |     |       |       |
| Biological Process | axon guidance                                 | predicted (union)      | 101 | 73.02 | 0.005 |
| Gene               |                                               |                        |     |       |       |
| Ontology -         | negative regulation                           |                        |     |       |       |
| Biological Process | of RNA biosynthetic process                   | predicted (union)      | 451 | 388.5 | 0.005 |
| Gene               |                                               |                        |     |       |       |
| Ontology -         | I-kappaB kinase/NF-kappaB signaling           | experimen tal (strong) | 10  | 2.762 | 0.005 |
| Biological Process |                                               |                        |     |       |       |
| Gene               |                                               |                        |     |       |       |
| Ontology -         | T cell migration                              | experimen tal (strong) | 5   | 0.619 | 0.005 |
| Biological Process |                                               |                        |     |       |       |
| Gene               |                                               |                        |     |       |       |
| Ontology -         | cellular response to chemokine                | experimen tal (strong) | 5   | 0.645 | 0.005 |
| Biological Process |                                               |                        |     |       |       |
| Gene               |                                               |                        |     |       |       |
| Ontology -         | leukocyte chemotaxis                          | experimen tal (strong) | 8   | 1.781 | 0.005 |
| Biological Process |                                               |                        |     |       |       |
| Gene               |                                               |                        |     |       |       |
| Ontology -         | positive regulation of cell differentiation   | experimen tal (strong) | 22  | 10.4  | 0.005 |
| Biological Process |                                               |                        |     |       |       |
| Gene               |                                               |                        |     |       |       |
| Ontology -         | regulation of actin cytoskeleton organization | experimen tal (strong) | 10  | 2.762 | 0.005 |
| Biological Process |                                               |                        |     |       |       |
| Gene               |                                               |                        |     |       |       |
| Ontology -         | regulation of catalytic activity              | experimen tal (strong) | 31  | 17.68 | 0.005 |
| Biological Process |                                               |                        |     |       |       |

|                               |                                          |    |       |       |  |
|-------------------------------|------------------------------------------|----|-------|-------|--|
| Gene                          | regulation of cellular                   |    |       |       |  |
| Ontology - Biological Process | component experimental movement (strong) | 22 | 10.4  | 0.005 |  |
| Gene                          | regulation of                            |    |       |       |  |
| Ontology - Biological Process | interleukin-23 production (strong)       | 3  | 0.155 | 0.005 |  |
| Gene                          | regulation of                            |    |       |       |  |
| Ontology - Biological Process | locomotion (strong)                      | 22 | 10.4  | 0.005 |  |
| Gene                          | regulation of reactive oxygen            |    |       |       |  |
| Ontology - Biological Process | species metabolic process (strong)       | 9  | 2.271 | 0.005 |  |
| Gene                          | response to                              |    |       |       |  |
| Ontology - Biological Process | interleukin-6 (strong)                   | 5  | 0.619 | 0.005 |  |
| Gene                          | T cell                                   |    |       |       |  |
| Ontology - Biological Process | proliferation (any)                      | 8  | 1.993 | 0.005 |  |
| Gene                          | cardiac chamber                          |    |       |       |  |
| Ontology - Biological Process | development (any)                        | 8  | 2.006 | 0.005 |  |
| Gene                          | cell                                     |    |       |       |  |
| Ontology - Biological Process | differentiation (any)                    | 60 | 41.22 | 0.005 |  |
| Gene                          | cell proliferation involved in heart     |    |       |       |  |
| Ontology - Biological Process | valve development (any)                  | 2  | 0.053 | 0.005 |  |

|            |                   |           |    |       |       |
|------------|-------------------|-----------|----|-------|-------|
| Gene       | cellular response |           |    |       |       |
| Ontology - | to organic        |           |    |       |       |
| Biological | cyclic            | experimen |    |       |       |
| Process    | compound          | tal (any) | 16 | 6.484 | 0.005 |
| Gene       |                   |           |    |       |       |
| Ontology - | developm          |           |    |       |       |
| Biological | ental             | experimen |    |       |       |
| Process    | process           | tal (any) | 85 | 63.82 | 0.005 |
| Gene       | endothelia        |           |    |       |       |
| Ontology - | I cell            |           |    |       |       |
| Biological | differentia       | experimen |    |       |       |
| Process    | tion              | tal (any) | 6  | 1.129 | 0.005 |
| Gene       |                   |           |    |       |       |
| Ontology - | leukocyte         |           |    |       |       |
| Biological | proliferatio      | experimen |    |       |       |
| Process    | n                 | tal (any) | 10 | 3.029 | 0.005 |
| Gene       |                   |           |    |       |       |
| Ontology - | membran           |           |    |       |       |
| Biological | e protein         |           |    |       |       |
| Process    | intracellul       |           |    |       |       |
| Gene       | ar domain         |           |    |       |       |
| Ontology - | proteolysi        | experimen |    |       |       |
| Biological | s                 | tal (any) | 3  | 0.199 | 0.005 |
| Process    | negative          |           |    |       |       |
| Gene       | regulation        |           |    |       |       |
| Ontology - | of                |           |    |       |       |
| Biological | mammary           |           |    |       |       |
| Process    | gland             |           |    |       |       |
| Gene       | epithelial        |           |    |       |       |
| Ontology - | cell              |           |    |       |       |
| Biological | proliferatio      | experimen |    |       |       |
| Process    | n                 | tal (any) | 2  | 0.053 | 0.005 |
| Gene       |                   |           |    |       |       |
| Ontology - | neurotran         |           |    |       |       |
| Biological | smmitter          |           |    |       |       |
| Process    | metabolic         | experimen |    |       |       |
| Gene       | process           | tal (any) | 7  | 1.555 | 0.005 |
| Ontology - | positive          |           |    |       |       |
| Biological | regulation        |           |    |       |       |
| Process    | of                |           |    |       |       |
| Gene       |                   |           |    |       |       |
| Ontology - | adaptive          |           |    |       |       |
| Biological | immune            | experimen |    |       |       |
| Process    | response          | tal (any) | 6  | 1.116 | 0.005 |

|                                             |                                                                               |                        |    |       |       |
|---------------------------------------------|-------------------------------------------------------------------------------|------------------------|----|-------|-------|
| Gene<br>Ontology -<br>Biological<br>Process | positive<br>regulation<br>of<br>inflammatory<br>response                      | experimen<br>tal (any) | 7  | 1.555 | 0.005 |
| Gene<br>Ontology -<br>Biological<br>Process | positive<br>regulation<br>of<br>interleukin-<br>12<br>biosynthetic<br>process | experimen<br>tal (any) | 2  | 0.053 | 0.005 |
| Gene<br>Ontology -<br>Biological<br>Process | positive<br>regulation<br>of<br>superoxide<br>anion<br>generation             | experimen<br>tal (any) | 3  | 0.199 | 0.005 |
| Gene<br>Ontology -<br>Biological<br>Process | regulation<br>of T cell<br>migration                                          | experimen<br>tal (any) | 4  | 0.438 | 0.005 |
| Gene<br>Ontology -<br>Biological<br>Process | regulation<br>of<br>cytokine<br>biosynthetic<br>process                       | experimen<br>tal (any) | 6  | 1.103 | 0.005 |
| Gene<br>Ontology -<br>Biological<br>Process | regulation<br>of focal<br>adhesion<br>assembly                                | experimen<br>tal (any) | 5  | 0.757 | 0.005 |
| Gene<br>Ontology -<br>Biological<br>Process | regulation<br>of kinase<br>activity                                           | experimen<br>tal (any) | 20 | 9.141 | 0.005 |
| Gene<br>Ontology -<br>Biological<br>Process | regulation<br>of<br>mammary<br>gland<br>epithelial<br>cell<br>proliferation   | experimen<br>tal (any) | 3  | 0.199 | 0.005 |



|            |              |           |     |       |       |
|------------|--------------|-----------|-----|-------|-------|
| Gene       | negative     |           |     |       |       |
| Ontology - | regulation   |           |     |       |       |
| Biological | of           | predicted |     |       |       |
| Process    | translation  | (union)   | 60  | 39.44 | 0.006 |
| Gene       |              |           |     |       |       |
| Ontology - | neuron       |           |     |       |       |
| Biological | developm     | predicted |     |       |       |
| Process    | ent          | (union)   | 404 | 345.9 | 0.006 |
| Gene       |              |           |     |       |       |
| Ontology - |              | experimen |     |       |       |
| Biological | chemotaxi    | tal       |     |       |       |
| Process    | s            | (strong)  | 15  | 5.833 | 0.006 |
| Gene       |              |           |     |       |       |
| Ontology - | nitric       |           |     |       |       |
| Biological | oxide        | experimen |     |       |       |
| Process    | metabolic    | tal       |     |       |       |
| Process    | process      | (strong)  | 6   | 1.032 | 0.006 |
| Gene       |              |           |     |       |       |
| Ontology - | positive     |           |     |       |       |
| Biological | regulation   | experimen |     |       |       |
| Process    | of T cell    | tal       |     |       |       |
| Process    | activation   | (strong)  | 9   | 2.349 | 0.006 |
| Gene       |              |           |     |       |       |
| Ontology - | positive     |           |     |       |       |
| Biological | regulation   | experimen |     |       |       |
| Process    | of cell      | tal       |     |       |       |
| Process    | migration    | (strong)  | 16  | 6.479 | 0.006 |
| Gene       |              |           |     |       |       |
| Ontology - | positive     |           |     |       |       |
| Biological | regulation   | experimen |     |       |       |
| Process    | of cell      | tal       |     |       |       |
| Process    | motility     | (strong)  | 16  | 6.504 | 0.006 |
| Gene       |              |           |     |       |       |
| Ontology - | positive     |           |     |       |       |
| Biological | regulation   |           |     |       |       |
| Process    | of           |           |     |       |       |
| Process    | leukocyte    | experimen |     |       |       |
| Process    | proliferatio | tal       |     |       |       |
| Process    | n            | (strong)  | 7   | 1.445 | 0.006 |
| Gene       |              |           |     |       |       |
| Ontology - | positive     |           |     |       |       |
| Biological | regulation   |           |     |       |       |
| Process    | of           |           |     |       |       |
| Process    | lymphocyt    | experimen |     |       |       |
| Process    | e            | tal       |     |       |       |
| Process    | migration    | (strong)  | 4   | 0.387 | 0.006 |

|      |                                                      |                    |                                         |    |       |       |
|------|------------------------------------------------------|--------------------|-----------------------------------------|----|-------|-------|
| Gene | positive regulation of lymphocyte experimental       | Biological Process | proliferation (strong)                  | 7  | 1.42  | 0.006 |
| Gene | positive regulation of mononuclear cell experimental | Biological Process | proliferation (strong)                  | 7  | 1.445 | 0.006 |
| Gene | regulation of T cell migration experimental          | Biological Process | response to corticosteroid (strong)     | 4  | 0.387 | 0.006 |
| Gene | response to corticosteroid experimental              | Biological Process | cardiovascular system development (any) | 8  | 1.884 | 0.006 |
| Gene | cardiovascular system development experimental       | Biological Process | cell-substrate junction assembly (any)  | 18 | 8.052 | 0.006 |
| Gene | cell-substrate junction assembly experimental        | Biological Process | embryonic morphogenesis (any)           | 6  | 1.196 | 0.006 |
| Gene | embryonic morphogenesis experimental                 | Biological Process | heterocyclic metabolic process (any)    | 16 | 6.644 | 0.006 |
| Gene | heterocyclic metabolic process experimental          | Biological Process | leukocyte apoptotic process (any)       | 84 | 63.37 | 0.006 |
| Gene | leukocyte apoptotic process experimental             | Biological Process | leukocyte degranulation (any)           | 6  | 1.183 | 0.006 |
| Gene | leukocyte degranulation experimental                 | Biological Process |                                         | 15 | 6.085 | 0.006 |

|                                    |                                                                                         |                    |    |       |       |
|------------------------------------|-----------------------------------------------------------------------------------------|--------------------|----|-------|-------|
| Gene Ontology - Biological Process | negative regulation of biosynthetic process                                             | experimental (any) | 30 | 16.61 | 0.006 |
| Gene Ontology - Biological Process | negative regulation of extrinsic apoptotic signaling pathway via death domain receptors | experimental (any) | 4  | 0.465 | 0.006 |
| Gene Ontology - Biological Process | negative regulation of myeloid cell apoptotic process                                   | experimental (any) | 3  | 0.213 | 0.006 |
| Gene Ontology - Biological Process | pericardium development                                                                 | experimental (any) | 3  | 0.213 | 0.006 |
| Gene Ontology - Biological Process | positive regulation of ERK1 and ERK2 cascade                                            | experimental (any) | 8  | 2.059 | 0.006 |
| Gene Ontology - Biological Process | positive regulation of T cell mediated immunity                                         | experimental (any) | 4  | 0.478 | 0.006 |
| Gene Ontology - Biological Process | positive regulation of interleukin-8 production                                         | experimental (any) | 4  | 0.465 | 0.006 |

|            |              |             |     |       |       |
|------------|--------------|-------------|-----|-------|-------|
| Gene       | pulmonary    |             |     |       |       |
| Ontology - | valve        |             |     |       |       |
| Biological | morphoge     | experimen   |     |       |       |
| Process    | nesis        | tal (any)   | 3   | 0.213 | 0.006 |
| Gene       | regulation   |             |     |       |       |
| Ontology - | of           |             |     |       |       |
| Biological | catalytic    | experimen   |     |       |       |
| Process    | activity     | tal (any)   | 39  | 23.66 | 0.006 |
|            | regulation   |             |     |       |       |
|            | of cell      |             |     |       |       |
|            | migration    |             |     |       |       |
| Gene       | involved in  |             |     |       |       |
| Ontology - | sprouting    |             |     |       |       |
| Biological | angiogene    | experimen   |     |       |       |
| Process    | sis          | tal (any)   | 4   | 0.465 | 0.006 |
|            | regulation   |             |     |       |       |
| Gene       | of           |             |     |       |       |
| Ontology - | immunogl     |             |     |       |       |
| Biological | obulin       | experimen   |     |       |       |
| Process    | secretion    | tal (any)   | 3   | 0.213 | 0.006 |
| Gene       | regulation   |             |     |       |       |
| Ontology - | of           |             |     |       |       |
| Biological | neurogen     | experimen   |     |       |       |
| Process    | esis         | tal (any)   | 19  | 8.743 | 0.006 |
|            | regulation   |             |     |       |       |
|            | of smooth    |             |     |       |       |
| Gene       | muscle       |             |     |       |       |
| Ontology - | cell         |             |     |       |       |
| Biological | proliferatio | experimen   |     |       |       |
| Process    | n            | tal (any)   | 7   | 1.634 | 0.006 |
| Gene       | vasculatur   |             |     |       |       |
| Ontology - | e            |             |     |       |       |
| Biological | developm     | experimen   |     |       |       |
| Process    | ent          | tal (any)   | 18  | 7.946 | 0.006 |
|            | negative     |             |     |       |       |
| Gene       | regulation   |             |     |       |       |
| Ontology - | of           | predicted   |     |       |       |
| Biological | biosynthet   | (intersecti |     |       |       |
| Process    | ic process   | on)         | 278 | 223.3 | 0.007 |
| Gene       | regulation   |             |     |       |       |
| Ontology - | of cell      | predicted   |     |       |       |
| Biological | differentia  | (intersecti |     |       |       |
| Process    | tion         | on)         | 333 | 273   | 0.007 |

|                        |                                                     |                       |     |       |       |
|------------------------|-----------------------------------------------------|-----------------------|-----|-------|-------|
| Gene                   |                                                     |                       |     |       |       |
| Ontology - cell        |                                                     |                       |     |       |       |
| Biological Process     | development                                         | predicted (union)     | 753 | 675.1 | 0.007 |
| Gene                   | cell morphogenesis                                  |                       |     |       |       |
| Ontology - involved in |                                                     |                       |     |       |       |
| Biological Process     | differentiation                                     | predicted (union)     | 266 | 219.8 | 0.007 |
| Gene                   |                                                     |                       |     |       |       |
| Ontology - neuron      |                                                     |                       |     |       |       |
| Biological Process     | projection guidance                                 | predicted (union)     | 101 | 73.8  | 0.007 |
| Gene                   | positive regulation of macromolecule biosynthesis   |                       |     |       |       |
| Ontology -             |                                                     |                       |     |       |       |
| Biological Process     | biosynthesis                                        | predicted (union)     | 680 | 606.8 | 0.007 |
| Gene                   | regulation of cellular protein localization         |                       |     |       |       |
| Ontology -             |                                                     |                       |     |       |       |
| Biological Process     | localization                                        | predicted (union)     | 228 | 185.5 | 0.007 |
| Gene                   |                                                     |                       |     |       |       |
| Ontology - tube        |                                                     |                       |     |       |       |
| Biological Process     | morphogenesis                                       | predicted (union)     | 336 | 284.3 | 0.007 |
| Gene                   | SMAD protein complex assembly                       |                       |     |       |       |
| Ontology -             |                                                     |                       |     |       |       |
| Biological Process     | assembly                                            | experimental (strong) | 3   | 0.181 | 0.007 |
| Gene                   | chemokine (C-X-C motif) ligand 12 signaling pathway |                       |     |       |       |
| Ontology -             |                                                     |                       |     |       |       |
| Biological Process     | pathway                                             | experimental (strong) | 2   | 0.052 | 0.007 |
| Gene                   |                                                     |                       |     |       |       |
| Ontology -             |                                                     |                       |     |       |       |
| Biological Process     | defense response                                    | experimental (strong) | 23  | 11.69 | 0.007 |

|                               |                                                          |                       |    |       |       |
|-------------------------------|----------------------------------------------------------|-----------------------|----|-------|-------|
| Gene                          |                                                          |                       |    |       |       |
| Ontology - Biological Process | inflammatory response                                    | experimental (strong) | 15 | 5.937 | 0.007 |
| Gene                          |                                                          |                       |    |       |       |
| Ontology - Biological Process | maintenance of permeability of blood-brain barrier       | experimental (strong) | 2  | 0.052 | 0.007 |
| Gene                          |                                                          |                       |    |       |       |
| Ontology - Biological Process | negative regulation of calcium ion transport             | experimental (strong) | 4  | 0.413 | 0.007 |
| Gene                          |                                                          |                       |    |       |       |
| Ontology - Biological Process | negative regulation of extracellular matrix organization | experimental (strong) | 2  | 0.052 | 0.007 |
| Gene                          |                                                          |                       |    |       |       |
| Ontology - Biological Process | negative regulation of growth rate                       | experimental (strong) | 2  | 0.052 | 0.007 |
| Gene                          |                                                          |                       |    |       |       |
| Ontology - Biological Process | negative regulation of interleukin-23 production         | experimental (strong) | 2  | 0.052 | 0.007 |
| Gene                          |                                                          |                       |    |       |       |
| Ontology - Biological Process | negative regulation of signal transduction               | experimental (strong) | 23 | 11.67 | 0.007 |
| Gene                          |                                                          |                       |    |       |       |
| Ontology - Biological Process | positive regulation of cell death                        | experimental (strong) | 18 | 8.053 | 0.007 |

|      |                                 |                    |                               |    |       |       |
|------|---------------------------------|--------------------|-------------------------------|----|-------|-------|
| Gene | positive regulation of cellular | Biological Process | component movement (strong)   | 16 | 6.556 | 0.007 |
| Gene | positive regulation of cellular | Biological Process | extravasation (strong)        | 2  | 0.052 | 0.007 |
| Gene | positive regulation of          | Biological Process | chemotaxis (strong)           | 7  | 1.497 | 0.007 |
| Gene | positive regulation of          | Biological Process | locomotion (strong)           | 16 | 6.659 | 0.007 |
| Gene | prostaglandin                   | Biological Process | biosynthetic process (strong) | 3  | 0.181 | 0.007 |
| Gene | regulation of T cell            | Biological Process | proliferation (strong)        | 7  | 1.523 | 0.007 |
| Gene | regulation of cell              | Biological Process | differentiation (strong)      | 30 | 17.42 | 0.007 |
| Gene | regulation of growth            | Biological Process | rate (strong)                 | 2  | 0.052 | 0.007 |
| Gene | regulation of leukocyte         | Biological Process | proliferation (strong)        | 9  | 2.4   | 0.007 |

|                               |                                          |              |    |       |       |
|-------------------------------|------------------------------------------|--------------|----|-------|-------|
| Gene                          | regulation of reactive oxygen            |              |    |       |       |
| Ontology - Biological Process | species biosynthetic process (strong)    | experimental | 6  | 1.058 | 0.007 |
| Gene                          |                                          |              |    |       |       |
| Ontology - Biological Process | response to alkaloid (strong)            | experimental | 6  | 1.084 | 0.007 |
| Gene                          | response to nitrogen compound            |              |    |       |       |
| Ontology - Biological Process | to nitrogen compound (strong)            | experimental | 21 | 10.04 | 0.007 |
| Gene                          |                                          |              |    |       |       |
| Ontology - Biological Process | response to ultrasound (strong)          | experimental | 2  | 0.052 | 0.007 |
| Gene                          |                                          |              |    |       |       |
| Ontology - Biological Process | secretion by cell (strong)               | experimental | 22 | 10.97 | 0.007 |
| Gene                          |                                          |              |    |       |       |
| Ontology - Biological Process | signal transduction (strong)             | experimental | 51 | 37.5  | 0.007 |
| Gene                          |                                          |              |    |       |       |
| Ontology - Biological Process | ameboidal-type cell migration (any)      | experimental | 12 | 4.332 | 0.007 |
| Gene                          |                                          |              |    |       |       |
| Ontology - Biological Process | anatomical structure morphogenesis (any) | experimental | 44 | 28.05 | 0.007 |
| Gene                          |                                          |              |    |       |       |
| Ontology - Biological Process | angiogenesis (any)                       | experimental | 14 | 5.567 | 0.007 |
| Gene                          |                                          |              |    |       |       |
| Ontology - Biological Process | epithelium development (any)             | experimental | 25 | 13.17 | 0.007 |



|                       |                                                  |                    |    |       |       |
|-----------------------|--------------------------------------------------|--------------------|----|-------|-------|
| Gene                  |                                                  |                    |    |       |       |
| Ontology - gland      |                                                  |                    |    |       |       |
| Biological Process    | developmental (any)                              | experimental (any) | 13 | 4.956 | 0.007 |
| Gene                  | mammary                                          |                    |    |       |       |
| Ontology - gland      |                                                  |                    |    |       |       |
| Biological Process    | developmental (any)                              | experimental (any) | 7  | 1.661 | 0.007 |
| Gene                  | multicellular                                    |                    |    |       |       |
| Ontology - organism   |                                                  |                    |    |       |       |
| Biological Process    | developmental (any)                              | experimental (any) | 75 | 55.29 | 0.007 |
| Gene                  | muscle                                           |                    |    |       |       |
| Ontology - tissue     |                                                  |                    |    |       |       |
| Biological Process    | developmental (any)                              | experimental (any) | 12 | 4.305 | 0.007 |
| Gene                  | positive regulation of nitric oxide biosynthesis |                    |    |       |       |
| Ontology - oxide      |                                                  |                    |    |       |       |
| Biological Process    | biosynthetic process                             | experimental (any) | 4  | 0.492 | 0.007 |
| Gene                  | positive regulation of protein acetylation       |                    |    |       |       |
| Ontology - of protein |                                                  |                    |    |       |       |
| Biological Process    | acetylation                                      | experimental (any) | 4  | 0.492 | 0.007 |
| Gene                  | regulation of cytoskeleton organization          |                    |    |       |       |
| Ontology - on         |                                                  |                    |    |       |       |
| Biological Process    | organization                                     | experimental (any) | 14 | 5.554 | 0.007 |
| Gene                  | regulation of growth                             |                    |    |       |       |
| Ontology -            |                                                  |                    |    |       |       |
| Biological Process    | regulation of growth                             | experimental (any) | 17 | 7.441 | 0.007 |
| Gene                  | response to alkaloid                             |                    |    |       |       |
| Ontology -            |                                                  |                    |    |       |       |
| Biological Process    | response to alkaloid                             | experimental (any) | 6  | 1.209 | 0.007 |
| Gene                  | smooth muscle                                    |                    |    |       |       |
| Ontology - cell       |                                                  |                    |    |       |       |
| Biological Process    | proliferation                                    | experimental (any) | 7  | 1.648 | 0.007 |

|            |             |           |     |       |       |
|------------|-------------|-----------|-----|-------|-------|
| Gene       | stress-     |           |     |       |       |
| Ontology - | activated   |           |     |       |       |
| Biological | MAPK        | experimen |     |       |       |
| Process    | cascade     | tal (any) | 10  | 3.162 | 0.007 |
| Gene       | establish   |           |     |       |       |
| Ontology - | ment of     |           |     |       |       |
| Biological | localizatio | predicted |     |       |       |
| Process    | n in cell   | (union)   | 746 | 670   | 0.008 |
| Gene       |             |           |     |       |       |
| Ontology - | bone        | experimen |     |       |       |
| Biological | remodelin   | tal       |     |       |       |
| Process    | g           | (strong)  | 6   | 1.136 | 0.008 |
| Gene       |             |           |     |       |       |
| Ontology - | neutrophil  |           |     |       |       |
| Biological | activation  |           |     |       |       |
| Process    | involved in | experimen |     |       |       |
| Process    | immune      | tal       |     |       |       |
| Process    | response    | (strong)  | 10  | 3.046 | 0.008 |
| Gene       |             |           |     |       |       |
| Ontology - | neutrophil  | experimen |     |       |       |
| Biological | degranula   | tal       |     |       |       |
| Process    | tion        | (strong)  | 10  | 3.046 | 0.008 |
| Gene       |             |           |     |       |       |
| Ontology - | nucleobas   |           |     |       |       |
| Biological | e-          |           |     |       |       |
| Process    | containing  |           |     |       |       |
| Process    | compound    | experimen |     |       |       |
| Process    | metabolic   | tal       |     |       |       |
| Process    | process     | (strong)  | 46  | 32.39 | 0.008 |
| Gene       | positive    |           |     |       |       |
| Ontology - | regulation  | experimen |     |       |       |
| Biological | of cell     | tal       |     |       |       |
| Process    | activation  | (strong)  | 11  | 3.639 | 0.008 |
| Gene       |             |           |     |       |       |
| Ontology - | positive    |           |     |       |       |
| Biological | regulation  |           |     |       |       |
| Process    | of protein  | experimen |     |       |       |
| Process    | kinase      | tal       |     |       |       |
| Process    | activity    | (strong)  | 15  | 6.066 | 0.008 |

|      |                                                                 |                       |    |       |       |
|------|-----------------------------------------------------------------|-----------------------|----|-------|-------|
| Gene | positive regulation of protein serine/threonine kinase activity | experimental (strong) | 12 | 4.181 | 0.008 |
| Gene | regulation of cytokine production                               | experimental (strong) | 16 | 6.788 | 0.008 |
| Gene | Fc receptor signaling pathway                                   | experimental (any)    | 8  | 2.232 | 0.008 |
| Gene | activation of protein kinase activity                           | experimental (any)    | 11 | 3.853 | 0.008 |
| Gene | animal organ regeneration                                       | experimental (any)    | 5  | 0.877 | 0.008 |
| Gene | cellular aromatic compound metabolic process                    | experimental (any)    | 84 | 63.8  | 0.008 |
| Gene | cellular response to oxygen levels                              | experimental (any)    | 9  | 2.75  | 0.008 |
| Gene | glial cell development                                          | experimental (any)    | 6  | 1.289 | 0.008 |
| Gene | interleukin-6-mediated signaling pathway                        | experimental (any)    | 3  | 0.239 | 0.008 |

|            |               |                     |    |       |       |
|------------|---------------|---------------------|----|-------|-------|
| Gene       | intracellular |                     |    |       |       |
| Ontology - | receptor      |                     |    |       |       |
| Biological | signaling     | experimental (any)  | 10 | 3.269 | 0.008 |
| Process    | pathway       |                     |    |       |       |
| Gene       | mammary       |                     |    |       |       |
| Ontology - | gland         |                     |    |       |       |
| Biological | epithelium    | developmental (any) | 5  | 0.850 | 0.008 |
| Process    | development   |                     |    |       |       |
| Gene       | membrane      |                     |    |       |       |
| Ontology - | to            |                     |    |       |       |
| Biological | membrane      | experimental (any)  | 2  | 0.066 | 0.008 |
| Process    | docking       |                     |    |       |       |
| Gene       | muscle        |                     |    |       |       |
| Ontology - | tissue        |                     |    |       |       |
| Biological | morphogenesis | experimental (any)  | 5  | 0.877 | 0.008 |
| Process    |               |                     |    |       |       |
| Gene       | necroptosis   |                     |    |       |       |
| Ontology - | cell          |                     |    |       |       |
| Biological | signaling     | experimental (any)  | 2  | 0.066 | 0.008 |
| Process    | pathway       |                     |    |       |       |
| Gene       | negative      |                     |    |       |       |
| Ontology - | regulation    |                     |    |       |       |
| Biological | of            |                     |    |       |       |
| Process    | apoptotic     | experimental (any)  | 9  | 2.737 | 0.008 |
| Gene       | signaling     |                     |    |       |       |
| Ontology - | pathway       |                     |    |       |       |
| Biological | negative      | experimental (any)  | 9  | 2.737 | 0.008 |
| Process    | regulation    |                     |    |       |       |
| Gene       | of growth     |                     |    |       |       |
| Ontology - |               |                     |    |       |       |
| Biological | phosphate-    |                     |    |       |       |
| Process    | containing    | compound            | 52 | 35.18 | 0.008 |
| Gene       | metabolic     | experimental (any)  |    |       |       |
| Ontology - | process       |                     |    |       |       |
| Biological |               |                     |    |       |       |
| Process    |               |                     |    |       |       |

|            |                     |           |    |       |       |
|------------|---------------------|-----------|----|-------|-------|
| Gene       | positive regulation |           |    |       |       |
| Ontology - | of T cell           |           |    |       |       |
| Biological | cytokine            | experimen |    |       |       |
| Process    | production          | tal (any) | 3  | 0.239 | 0.008 |
| Gene       | positive regulation |           |    |       |       |
| Ontology - | of cell             | experimen |    |       |       |
| Biological | cycle               | tal (any) | 12 | 4.398 | 0.008 |
| Process    |                     |           |    |       |       |
| Gene       | positive regulation |           |    |       |       |
| Ontology - | of                  |           |    |       |       |
| Biological | interferon-         | experimen |    |       |       |
| Process    | alpha production    | tal (any) | 3  | 0.239 | 0.008 |
| Gene       | positive regulation |           |    |       |       |
| Ontology - | of nitric           |           |    |       |       |
| Biological | oxide               | experimen |    |       |       |
| Process    | metabolic process   | tal (any) | 4  | 0.505 | 0.008 |
| Gene       | positive regulation |           |    |       |       |
| Ontology - | of                  |           |    |       |       |
| Biological | adaptive            | experimen |    |       |       |
| Process    | immune response     | tal (any) | 7  | 1.727 | 0.008 |
| Gene       | regulation          |           |    |       |       |
| Ontology - | of glial cell       |           |    |       |       |
| Biological | differentia         | experimen |    |       |       |
| Process    | tion                | tal (any) | 5  | 0.877 | 0.008 |
| Gene       | regulation          |           |    |       |       |
| Ontology - | of growth           | experimen |    |       |       |
| Biological | rate                | tal (any) | 2  | 0.066 | 0.008 |
| Process    |                     |           |    |       |       |
| Gene       | regulation          |           |    |       |       |
| Ontology - | of                  |           |    |       |       |
| Biological | ossificatio         | experimen |    |       |       |
| Process    | n                   | tal (any) | 8  | 2.219 | 0.008 |
| Gene       | regulation          |           |    |       |       |
| Ontology - | of                  |           |    |       |       |
| Biological | superoxid           | experimen |    |       |       |
| Process    | e anion generatio   | tal (any) | 3  | 0.239 | 0.008 |
| Gene       | regulation          |           |    |       |       |
| Ontology - | of                  |           |    |       |       |
| Biological | superoxid           | experimen |    |       |       |
| Process    | e anion generatio   | tal (any) | 3  | 0.239 | 0.008 |

|                             |                       |                          |     |       |       |
|-----------------------------|-----------------------|--------------------------|-----|-------|-------|
| Gene                        |                       |                          |     |       |       |
| Ontology - response         |                       |                          |     |       |       |
| Biological Process          | to radiation          | experimental (any)       | 13  | 5.076 | 0.008 |
| Gene                        | response              |                          |     |       |       |
| Ontology - to tumor         |                       |                          |     |       |       |
| Biological Process          | necrosis factor       | experimental (any)       | 10  | 3.229 | 0.008 |
| Gene                        |                       |                          |     |       |       |
| Ontology -                  |                       |                          |     |       |       |
| Biological Process          | serotonin uptake      | experimental (any)       | 2   | 0.066 | 0.008 |
| Gene                        |                       |                          |     |       |       |
| Ontology - cell             |                       | predicted                |     |       |       |
| Biological Process          | morphogenesis         | (intersection)           | 182 | 138.7 | 0.009 |
| Gene                        | response              |                          |     |       |       |
| Ontology - to platelet-     |                       |                          |     |       |       |
| Biological Process          | derived growth factor | predicted (intersection) | 12  | 3.579 | 0.009 |
| Gene                        | tricuspid             |                          |     |       |       |
| Ontology - valve            |                       | predicted                |     |       |       |
| Biological Process          | development           | (intersection)           | 6   | 1.074 | 0.009 |
| Gene                        |                       |                          |     |       |       |
| Ontology - cellular         |                       |                          |     |       |       |
| Biological Process          | localization          | predicted (union)        | 977 | 891.8 | 0.009 |
| Gene                        |                       |                          |     |       |       |
| Ontology -                  |                       | experimental             |     |       |       |
| Biological Process          | cell-cell adhesion    | (strong)                 | 16  | 6.866 | 0.009 |
| Gene                        |                       |                          |     |       |       |
| Ontology - mononuclear cell |                       | experimental             |     |       |       |
| Biological Process          | migration             | (strong)                 | 5   | 0.774 | 0.009 |
| Gene                        |                       |                          |     |       |       |
| Ontology - cell             |                       | experimental             |     |       |       |
| Biological Process          | proliferation         | (strong)                 | 7   | 1.6   | 0.009 |

|      |                                                         |    |       |       |
|------|---------------------------------------------------------|----|-------|-------|
| Gene | regulation of interleukin-12 production (strong)        | 5  | 0.774 | 0.009 |
| Gene | response to external biotic stimulus (strong)           | 21 | 10.43 | 0.009 |
| Gene | response to interleukin-1 (strong)                      | 8  | 2.065 | 0.009 |
| Gene | response to other organism (strong)                     | 21 | 10.43 | 0.009 |
| Gene | B cell activation involved in immune response (any)     | 5  | 0.890 | 0.009 |
| Gene | positive regulation of catalytic activity (any)         | 27 | 14.92 | 0.009 |
| Gene | positive regulation of glial cell differentiation (any) | 4  | 0.545 | 0.009 |
| Gene | positive regulation of protein secretion (any)          | 9  | 2.764 | 0.009 |
| Gene | response to prostaglandin E (any)                       | 3  | 0.252 | 0.009 |
| Gene | vesicle-mediated transport (any)                        | 35 | 21.15 | 0.009 |

|                               |                                                                                                       |    |       |       |  |
|-------------------------------|-------------------------------------------------------------------------------------------------------|----|-------|-------|--|
| Gene                          | adaptive immune response based on somatic recombination of immune receptors built from immunoglobulin |    |       |       |  |
| Ontology - Biological Process | experimental superfamily domains (strong)                                                             | 8  | 2.117 | 0.010 |  |
| Gene                          | glial cell differentiation                                                                            |    |       |       |  |
| Ontology - Biological Process | experimental (strong)                                                                                 | 9  | 2.633 | 0.010 |  |
| Gene                          | interleukin-12 production                                                                             |    |       |       |  |
| Ontology - Biological Process | experimental (strong)                                                                                 | 5  | 0.800 | 0.010 |  |
| Gene                          | positive regulation of histone acetylation                                                            |    |       |       |  |
| Ontology - Biological Process | experimental (strong)                                                                                 | 4  | 0.465 | 0.010 |  |
| Gene                          | positive regulation of protein complex assembly                                                       |    |       |       |  |
| Ontology - Biological Process | experimental (strong)                                                                                 | 8  | 2.091 | 0.010 |  |
| Gene                          | proteolysis                                                                                           |    |       |       |  |
| Ontology - Biological Process | experimental (strong)                                                                                 | 21 | 10.58 | 0.010 |  |
| Gene                          | regulation of RNA metabolic process                                                                   |    |       |       |  |
| Ontology - Biological Process | experimental (strong)                                                                                 | 40 | 26.87 | 0.010 |  |



|                               |                                          |                       |    |       |       |
|-------------------------------|------------------------------------------|-----------------------|----|-------|-------|
| Gene                          | regulation of actin                      |                       |    |       |       |
| Ontology - Biological Process | filament-based process                   | experimental (strong) | 10 | 3.149 | 0.010 |
| Gene                          | regulation of                            |                       |    |       |       |
| Ontology - Biological Process | metabolic process                        | experimental (strong) | 55 | 42.43 | 0.010 |
| Gene                          | toll-like                                |                       |    |       |       |
| Ontology - Biological Process | receptor signaling pathway               | experimental (strong) | 7  | 1.626 | 0.010 |
| Gene                          | DNA damage response, signal transduction |                       |    |       |       |
| Ontology - Biological Process | on by p53 class mediator                 | experimental (any)    | 6  | 1.355 | 0.010 |
| Gene                          | blood vessel                             |                       |    |       |       |
| Ontology - Biological Process | endothelial cell migration               | experimental (any)    | 6  | 1.342 | 0.010 |
| Gene                          | cellular response to                     |                       |    |       |       |
| Ontology - Biological Process | prostaglandin stimulus                   | experimental (any)    | 3  | 0.266 | 0.010 |
| Gene                          |                                          |                       |    |       |       |
| Ontology - Biological Process | cytokine secretion                       | experimental (any)    | 8  | 2.325 | 0.010 |
| Gene                          |                                          |                       |    |       |       |
| Ontology - Biological Process | exocytosis                               | experimental (any)    | 20 | 9.899 | 0.010 |
| Gene                          |                                          |                       |    |       |       |
| Ontology - Biological Process | head development                         | experimental (any)    | 18 | 8.57  | 0.010 |

|            |                      |     |       |       |  |
|------------|----------------------|-----|-------|-------|--|
| Gene       | homeosta             |     |       |       |  |
| Ontology - | sis of               |     |       |       |  |
| Biological | number of experimen  |     |       |       |  |
| Process    | cells tal (any)      | 9   | 2.87  | 0.010 |  |
| Gene       |                      |     |       |       |  |
| Ontology - | immunogl             |     |       |       |  |
| Biological | obulin experimen     |     |       |       |  |
| Process    | secretion tal (any)  | 3   | 0.266 | 0.010 |  |
| Gene       | inflammat            |     |       |       |  |
| Ontology - | ory cell             |     |       |       |  |
| Biological | apoptotic experimen  |     |       |       |  |
| Process    | process tal (any)    | 3   | 0.266 | 0.010 |  |
| Gene       |                      |     |       |       |  |
| Ontology - | lymphocyt            |     |       |       |  |
| Biological | e experimen          |     |       |       |  |
| Process    | migration tal (any)  | 5   | 0.930 | 0.010 |  |
| Gene       | macromol             |     |       |       |  |
| Ontology - | ecule                |     |       |       |  |
| Biological | metabolic experimen  |     |       |       |  |
| Process    | process tal (any)    | 118 | 97.53 | 0.010 |  |
| Gene       |                      |     |       |       |  |
| Ontology - |                      |     |       |       |  |
| Biological | necrotic experimen   |     |       |       |  |
| Process    | cell death tal (any) | 4   | 0.558 | 0.010 |  |
|            | negative             |     |       |       |  |
|            | regulation           |     |       |       |  |
| Gene       | of                   |     |       |       |  |
| Ontology - | endothelia           |     |       |       |  |
| Biological | I cell experimen     |     |       |       |  |
| Process    | migration tal (any)  | 4   | 0.558 | 0.010 |  |
|            | negative             |     |       |       |  |
|            | regulation           |     |       |       |  |
|            | of                   |     |       |       |  |
|            | transmem             |     |       |       |  |
|            | brane                |     |       |       |  |
|            | receptor             |     |       |       |  |
|            | protein              |     |       |       |  |
|            | serine/thr           |     |       |       |  |
| Gene       | eonine               |     |       |       |  |
| Ontology - | kinase               |     |       |       |  |
| Biological | signaling experimen  |     |       |       |  |
| Process    | pathway tal (any)    | 6   | 1.329 | 0.010 |  |
| Gene       | peptidyl-            |     |       |       |  |
| Ontology - | tyrosine             |     |       |       |  |
| Biological | phosphory experimen  |     |       |       |  |
| Process    | lation tal (any)     | 11  | 3.973 | 0.010 |  |

|                                    |                                                   |                       |    |       |       |
|------------------------------------|---------------------------------------------------|-----------------------|----|-------|-------|
| Gene Ontology - Biological Process | positive regulation of leukocyte chemotaxis       | experimental (any)    | 5  | 0.917 | 0.010 |
| Gene Ontology - Biological Process | positive regulation of mononuclear cell migration | experimental (any)    | 3  | 0.266 | 0.010 |
| Gene Ontology - Biological Process | prostaglandin biosynthetic process                | experimental (any)    | 3  | 0.266 | 0.010 |
| Gene Ontology - Biological Process | protein-containing complex assembly               | experimental (any)    | 32 | 18.93 | 0.010 |
| Gene Ontology - Biological Process | pulmonary valve development                       | experimental (any)    | 3  | 0.266 | 0.010 |
| Gene Ontology - Biological Process | regulation of monocyte chemotaxis                 | experimental (any)    | 3  | 0.266 | 0.010 |
| Gene Ontology - Biological Process | wound healing                                     | experimental (any)    | 14 | 5.82  | 0.010 |
| Gene Ontology - Biological Process | cell migration                                    | experimental (strong) | 25 | 13.78 | 0.011 |
| Gene Ontology - Biological Process | cellular extravasation                            | experimental (strong) | 4  | 0.490 | 0.011 |

|            |               |           |    |       |       |
|------------|---------------|-----------|----|-------|-------|
| Gene       | heterocycl    |           |    |       |       |
| Ontology - | e             | experimen |    |       |       |
| Biological | metabolic     | tal       |    |       |       |
| Process    | process       | (strong)  | 46 | 32.91 | 0.011 |
| Gene       | membran       |           |    |       |       |
| Ontology - | e protein     |           |    |       |       |
| Biological | intracellul   | experimen |    |       |       |
| Process    | ar domain     | tal       | 3  | 0.232 | 0.011 |
| Process    | proteolysi    | (strong)  |    |       |       |
| Gene       | positive      |           |    |       |       |
| Ontology - | regulation    |           |    |       |       |
| Biological | of glial cell | experimen |    |       |       |
| Process    | differentia   | tal       | 4  | 0.490 | 0.011 |
| Process    | tion          | (strong)  |    |       |       |
| Gene       | positive      |           |    |       |       |
| Ontology - | regulation    |           |    |       |       |
| Biological | of peptidyl-  | experimen |    |       |       |
| Process    | serine        | tal       | 6  | 1.213 | 0.011 |
| Process    | phosphory     | (strong)  |    |       |       |
| Process    | lation        |           |    |       |       |
| Gene       | positive      |           |    |       |       |
| Ontology - | regulation    |           |    |       |       |
| Biological | of reactive   | experimen |    |       |       |
| Process    | oxygen        | tal       | 6  | 1.239 | 0.011 |
| Process    | species       | (strong)  |    |       |       |
| Process    | metabolic     |           |    |       |       |
| Process    | process       |           |    |       |       |
| Gene       | positive      |           |    |       |       |
| Ontology - | regulation    |           |    |       |       |
| Biological | of            | experimen |    |       |       |
| Process    | vascular      | tal       | 4  | 0.490 | 0.011 |
| Process    | endothelia    | (strong)  |    |       |       |
| Process    | I growth      |           |    |       |       |
| Process    | factor        |           |    |       |       |
| Process    | production    |           |    |       |       |
| Gene       | regulation    |           |    |       |       |
| Ontology - | of glial cell | experimen |    |       |       |
| Biological | differentia   | tal       | 5  | 0.826 | 0.011 |
| Process    | tion          | (strong)  |    |       |       |

|                               |                              |                       |    |       |       |
|-------------------------------|------------------------------|-----------------------|----|-------|-------|
| Gene                          | regulation of                |                       |    |       |       |
| Ontology - Biological Process | immunoglobulin secretion     | experimental (strong) | 3  | 0.232 | 0.011 |
| Gene                          | regulation of                |                       |    |       |       |
| Ontology - Biological Process | lymphocyte activation        | experimental (strong) | 12 | 4.44  | 0.011 |
| Gene                          | regulation of                |                       |    |       |       |
| Ontology - Biological Process | monocyte chemotaxis          | experimental (strong) | 3  | 0.232 | 0.011 |
| Gene                          | response                     |                       |    |       |       |
| Ontology - Biological Process | to organic cyclic compound   | experimental (strong) | 20 | 9.989 | 0.011 |
| Gene                          | SMAD protein                 |                       |    |       |       |
| Ontology - Biological Process | signal transduction          | experimental (any)    | 4  | 0.585 | 0.011 |
| Gene                          | atrioventricular             |                       |    |       |       |
| Ontology - Biological Process | valve formation              | experimental (any)    | 2  | 0.080 | 0.011 |
| Gene                          | cardiac                      |                       |    |       |       |
| Ontology - Biological Process | septum development           | experimental (any)    | 6  | 1.395 | 0.011 |
| Gene                          | common-partner               |                       |    |       |       |
| Ontology - Biological Process | SMAD protein phosphorylation | experimental (any)    | 2  | 0.080 | 0.011 |
| Gene                          | endocardial                  |                       |    |       |       |
| Ontology - Biological Process | cell differentiation         | experimental (any)    | 2  | 0.080 | 0.011 |
| Gene                          | endothelial                  |                       |    |       |       |
| Ontology - Biological Process | cell migration               | experimental (any)    | 8  | 2.352 | 0.011 |

|                    |                                                            |                    |    |       |       |
|--------------------|------------------------------------------------------------|--------------------|----|-------|-------|
| Gene               |                                                            |                    |    |       |       |
| Ontology - gene    |                                                            |                    |    |       |       |
| Biological Process | expression                                                 | experimental (any) | 77 | 58.17 | 0.011 |
| Gene               | granulocyte                                                |                    |    |       |       |
| Ontology - e       |                                                            |                    |    |       |       |
| Biological Process | chemotaxis                                                 | experimental (any) | 5  | 0.943 | 0.011 |
| Gene               |                                                            |                    |    |       |       |
| Ontology - heart   |                                                            |                    |    |       |       |
| Biological Process | morphogenesis                                              | experimental (any) | 9  | 2.883 | 0.011 |
| Gene               |                                                            |                    |    |       |       |
| Ontology -         |                                                            |                    |    |       |       |
| Biological Process | lactation                                                  | experimental (any) | 4  | 0.571 | 0.011 |
| Gene               | mesenchymal cell                                           |                    |    |       |       |
| Ontology -         |                                                            |                    |    |       |       |
| Biological Process | differentiation                                            | experimental (any) | 8  | 2.378 | 0.011 |
| Gene               | muscle                                                     |                    |    |       |       |
| Ontology - organ   |                                                            |                    |    |       |       |
| Biological Process | morphogenesis                                              | experimental (any) | 5  | 0.943 | 0.011 |
| Gene               | negative regulation of extracellular matrix organization   |                    |    |       |       |
| Ontology -         |                                                            |                    |    |       |       |
| Biological Process | organization                                               | experimental (any) | 2  | 0.080 | 0.011 |
| Gene               | macrophage                                                 |                    |    |       |       |
| Ontology - ge      |                                                            |                    |    |       |       |
| Biological Process | apoptotic process                                          | experimental (any) | 2  | 0.080 | 0.011 |
| Gene               | positive regulation of T-helper 2 cell cytokine production |                    |    |       |       |
| Ontology - cell    |                                                            |                    |    |       |       |
| Biological Process | cytokine production                                        | experimental (any) | 2  | 0.080 | 0.011 |

|                                    |                                                                      |                    |   |       |       |
|------------------------------------|----------------------------------------------------------------------|--------------------|---|-------|-------|
| Gene Ontology - Biological Process | positive regulation of extrinsic apoptotic signaling pathway         | experimental (any) | 4 | 0.571 | 0.011 |
| Gene Ontology - Biological Process | positive regulation of lipopolysaccharide-mediated signaling pathway | experimental (any) | 2 | 0.080 | 0.011 |
| Gene Ontology - Biological Process | positive regulation of peptide secretion                             | experimental (any) | 9 | 2.923 | 0.011 |
| Gene Ontology - Biological Process | positive regulation of protein localization to membrane              | experimental (any) | 6 | 1.395 | 0.011 |
| Gene Ontology - Biological Process | positive regulation of wound healing                                 | experimental (any) | 4 | 0.571 | 0.011 |
| Gene Ontology - Biological Process | regulation of blood vessel diameter                                  | experimental (any) | 6 | 1.382 | 0.011 |
| Gene Ontology - Biological Process | regulation of bone remodeling                                        | experimental (any) | 4 | 0.571 | 0.011 |
| Gene Ontology - Biological Process | regulation of cellular extravasation                                 | experimental (any) | 3 | 0.279 | 0.011 |

|                    |                                              |                          |     |       |       |
|--------------------|----------------------------------------------|--------------------------|-----|-------|-------|
| Gene               | regulation of                                |                          |     |       |       |
| Ontology -         | inflammatory response                        | experimental (any)       | 10  | 3.455 | 0.011 |
| Biological Process |                                              |                          |     |       |       |
| Gene               | response to UV-A                             | experimental (any)       | 2   | 0.080 | 0.011 |
| Ontology -         |                                              |                          |     |       |       |
| Biological Process | trabecular morphogenesis                     | experimental (any)       | 4   | 0.571 | 0.011 |
| Gene               | ventricular cardiac muscle                   |                          |     |       |       |
| Ontology -         | tissue morphogenesis                         | experimental (any)       | 4   | 0.571 | 0.011 |
| Biological Process |                                              |                          |     |       |       |
| Gene               | cellular response to hormone stimulus        | predicted (intersection) | 138 | 101.3 | 0.012 |
| Ontology -         |                                              |                          |     |       |       |
| Biological Process | calcium ion transport                        | experimental (strong)    | 9   | 2.736 | 0.012 |
| Gene               |                                              |                          |     |       |       |
| Ontology -         | cell chemotaxis                              | experimental (strong)    | 9   | 2.736 | 0.012 |
| Biological Process |                                              |                          |     |       |       |
| Gene               | cellular aromatic compound metabolic process | experimental (strong)    | 46  | 33.14 | 0.012 |
| Ontology -         |                                              |                          |     |       |       |
| Biological Process |                                              |                          |     |       |       |
| Gene               | cytokine production                          |                          |     |       |       |
| Ontology -         | involved in immune response                  | experimental (strong)    | 6   | 1.265 | 0.012 |
| Biological Process |                                              |                          |     |       |       |



|                               |                                                             |                       |    |       |       |
|-------------------------------|-------------------------------------------------------------|-----------------------|----|-------|-------|
| Gene                          | negative regulation of blood vessel                         |                       |    |       |       |
| Ontology - Biological Process | endothelial cell migration                                  | experimental (strong) | 4  | 0.516 | 0.012 |
| Gene                          | positive regulation of kinase activity                      |                       |    |       |       |
| Ontology - Biological Process | regulation of kinase activity                               | experimental (strong) | 15 | 6.427 | 0.012 |
| Gene                          | protein autoubiquitination                                  |                       |    |       |       |
| Ontology - Biological Process | protein autoubiquitination                                  | experimental (strong) | 4  | 0.516 | 0.012 |
| Gene                          | regulation of blood vessel diameter                         |                       |    |       |       |
| Ontology - Biological Process | regulation of blood vessel diameter                         | experimental (strong) | 6  | 1.265 | 0.012 |
| Gene                          | regulation of vascular endothelial growth factor production |                       |    |       |       |
| Ontology - Biological Process | regulation of vascular endothelial growth factor production | experimental (strong) | 4  | 0.516 | 0.012 |
| Gene                          | response to organic substance                               |                       |    |       |       |
| Ontology - Biological Process | response to organic substance                               | experimental (strong) | 41 | 28.19 | 0.012 |
| Gene                          | vascular endothelial growth factor production               |                       |    |       |       |
| Ontology - Biological Process | vascular endothelial growth factor production               | experimental (strong) | 4  | 0.516 | 0.012 |
| Gene                          | cellular response to hypoxia                                |                       |    |       |       |
| Ontology - Biological Process | cellular response to hypoxia                                | experimental (any)    | 8  | 2.418 | 0.012 |
| Gene                          | gonad development                                           |                       |    |       |       |
| Ontology - Biological Process | gonad development                                           | experimental (any)    | 8  | 2.418 | 0.012 |

|                    |                                                    |                    |   |       |       |
|--------------------|----------------------------------------------------|--------------------|---|-------|-------|
| Gene               | negative regulation of sprouting                   |                    |   |       |       |
| Biological Process | angiogenesis                                       | experimental (any) | 3 | 0.292 | 0.012 |
| Gene               | outflow tract morphogenesis                        |                    |   |       |       |
| Biological Process | morphogenesis                                      | experimental (any) | 5 | 0.983 | 0.012 |
| Gene               | positive regulation of cell growth                 |                    |   |       |       |
| Biological Process | of cell growth                                     | experimental (any) | 7 | 1.913 | 0.012 |
| Gene               | positive regulation of chemokine production        |                    |   |       |       |
| Biological Process | chemokine production                               | experimental (any) | 4 | 0.598 | 0.012 |
| Gene               | positive regulation of growth                      |                    |   |       |       |
| Biological Process | regulation of growth                               | experimental (any) | 9 | 2.936 | 0.012 |
| Gene               | regulation of BMP signaling pathway                |                    |   |       |       |
| Biological Process | of BMP signaling pathway                           | experimental (any) | 5 | 0.970 | 0.012 |
| Gene               | regulation of cysteine-type endopeptidase activity |                    |   |       |       |
| Biological Process | involved in apoptotic process                      | experimental (any) | 8 | 2.392 | 0.012 |
| Gene               | regulation of gliogenesis                          |                    |   |       |       |
| Biological Process | of gliogenesis                                     | experimental (any) | 6 | 1.422 | 0.012 |

|      |                                               |                       |    |       |       |
|------|-----------------------------------------------|-----------------------|----|-------|-------|
| Gene | regulation of interferon-beta production      | experimental (any)    | 4  | 0.598 | 0.012 |
| Gene | regulation of peptidyl-serine phosphorylation | experimental (any)    | 6  | 1.422 | 0.012 |
| Gene | regulation of stress fiber assembly           | experimental (any)    | 5  | 0.970 | 0.012 |
| Gene | response to interferon-beta                   | experimental (any)    | 3  | 0.292 | 0.012 |
| Gene | striated muscle tissue development            | experimental (any)    | 11 | 4.132 | 0.012 |
| Gene | B cell activation involved in immune response | experimental (strong) | 5  | 0.878 | 0.013 |
| Gene | interleukin-1-mediated signaling pathway      | experimental (strong) | 5  | 0.878 | 0.013 |
| Gene | negative regulation of signaling              | experimental (strong) | 23 | 12.47 | 0.013 |
| Gene | positive regulation of leukocyte chemotaxis   | experimental (strong) | 5  | 0.878 | 0.013 |

|      |                                                     |                       |    |       |       |
|------|-----------------------------------------------------|-----------------------|----|-------|-------|
| Gene | positive regulation of transcription, DNA-templated | experimental (strong) | 26 | 14.87 | 0.013 |
| Gene | response to drug                                    | experimental (strong) | 19 | 9.395 | 0.013 |
| Gene | Fc-epsilon receptor signaling pathway               | experimental (any)    | 6  | 1.462 | 0.013 |
| Gene | Roundabout signaling pathway                        | experimental (any)    | 2  | 0.093 | 0.013 |
| Gene | brain development                                   | experimental (any)    | 17 | 8.105 | 0.013 |
| Gene | cellular response to tumor necrosis factor          | experimental (any)    | 9  | 3.003 | 0.013 |
| Gene | development of primary sexual characteristics       | experimental (any)    | 8  | 2.485 | 0.013 |
| Gene | endocardial cushion formation                       | experimental (any)    | 3  | 0.306 | 0.013 |
| Gene | focal adhesion assembly                             | experimental (any)    | 5  | 0.997 | 0.013 |
| Gene | interferon-beta production                          | experimental (any)    | 4  | 0.624 | 0.013 |

|            |              |           |    |       |       |
|------------|--------------|-----------|----|-------|-------|
| Gene       |              |           |    |       |       |
| Ontology - | interleukin- |           |    |       |       |
| Biological | 10           | experimen |    |       |       |
| Process    | production   | tal (any) | 4  | 0.611 | 0.013 |
| Gene       | mesenchy     |           |    |       |       |
| Ontology - | me           |           |    |       |       |
| Biological | developm     | experimen |    |       |       |
| Process    | ent          | tal (any) | 9  | 2.99  | 0.013 |
|            | negative     |           |    |       |       |
|            | regulation   |           |    |       |       |
|            | of           |           |    |       |       |
| Gene       | biomineral   |           |    |       |       |
| Ontology - | tissue       |           |    |       |       |
| Biological | developm     | experimen |    |       |       |
| Process    | ent          | tal (any) | 3  | 0.306 | 0.013 |
|            |              |           |    |       |       |
|            | negative     |           |    |       |       |
| Gene       | regulation   |           |    |       |       |
| Ontology - | of cellular  |           |    |       |       |
| Biological | metabolic    | experimen |    |       |       |
| Process    | process      | tal (any) | 41 | 26.79 | 0.013 |
|            | negative     |           |    |       |       |
|            | regulation   |           |    |       |       |
|            | of           |           |    |       |       |
|            | chemokin     |           |    |       |       |
| Gene       | e-           |           |    |       |       |
| Ontology - | mediated     |           |    |       |       |
| Biological | signaling    | experimen |    |       |       |
| Process    | pathway      | tal (any) | 2  | 0.093 | 0.013 |
| Gene       | negative     |           |    |       |       |
| Ontology - | regulation   |           |    |       |       |
| Biological | of ion       | experimen |    |       |       |
| Process    | transport    | tal (any) | 6  | 1.462 | 0.013 |
| Gene       | pericardiu   |           |    |       |       |
| Ontology - | m            |           |    |       |       |
| Biological | morphoge     | experimen |    |       |       |
| Process    | nesis        | tal (any) | 2  | 0.093 | 0.013 |
|            | positive     |           |    |       |       |
|            | regulation   |           |    |       |       |
|            | of Ras       |           |    |       |       |
| Gene       | protein      |           |    |       |       |
| Ontology - | signal       |           |    |       |       |
| Biological | transducti   | experimen |    |       |       |
| Process    | on           | tal (any) | 4  | 0.624 | 0.013 |

|                                    |                                                                      |                    |    |       |       |
|------------------------------------|----------------------------------------------------------------------|--------------------|----|-------|-------|
| Gene Ontology - Biological Process | positive regulation of T cell proliferation                          | experimental (any) | 5  | 0.997 | 0.013 |
| Gene Ontology - Biological Process | positive regulation of fibroblast proliferation                      | experimental (any) | 4  | 0.611 | 0.013 |
| Gene Ontology - Biological Process | receptor signaling via JAK-STAT                                      | experimental (any) | 6  | 1.448 | 0.013 |
| Gene Ontology - Biological Process | regulated exocytosis                                                 | experimental (any) | 18 | 8.823 | 0.013 |
| Gene Ontology - Biological Process | regulation of MyD88-independent toll-like receptor signaling pathway | experimental (any) | 2  | 0.093 | 0.013 |
| Gene Ontology - Biological Process | regulation of blood vessel size                                      | experimental (any) | 6  | 1.435 | 0.013 |
| Gene Ontology - Biological Process | regulation of interleukin-6 production                               | experimental (any) | 6  | 1.435 | 0.013 |
| Gene Ontology - Biological Process | regulation of lymphocyte differentiation                             | experimental (any) | 7  | 1.927 | 0.013 |

|                    |                                              |                       |     |       |       |
|--------------------|----------------------------------------------|-----------------------|-----|-------|-------|
| Gene               | regulation of neural precursor cell          |                       |     |       |       |
| Biological Process | proliferation                                | experimental (any)    | 5   | 1.01  | 0.013 |
| Gene               | regulation of pro-B cell                     |                       |     |       |       |
| Biological Process | differentiation                              | experimental (any)    | 2   | 0.093 | 0.013 |
| Gene               | regulation of tube size                      |                       |     |       |       |
| Biological Process | of tube size                                 | experimental (any)    | 6   | 1.448 | 0.013 |
| Gene               | response to fatty acid                       |                       |     |       |       |
| Biological Process | to fatty acid                                | experimental (any)    | 5   | 0.997 | 0.013 |
| Gene               | central nervous system development           |                       |     |       |       |
| Biological Process | development                                  | predicted (union)     | 382 | 329.2 | 0.014 |
| Gene               | enzyme linked receptor                       |                       |     |       |       |
| Biological Process | signaling pathway                            | predicted (union)     | 385 | 331.9 | 0.014 |
| Gene               | positive regulation of cellular biosynthesis |                       |     |       |       |
| Biological Process | biosynthetic process                         | predicted (union)     | 706 | 634.9 | 0.014 |
| Gene               | RNA metabolic process                        |                       |     |       |       |
| Biological Process | metabolic process                            | experimental (strong) | 41  | 28.47 | 0.014 |
| Gene               | cell motility                                |                       |     |       |       |
| Biological Process | cell motility                                | experimental (strong) | 25  | 14.22 | 0.014 |

|                               |                                                             |                       |    |       |       |
|-------------------------------|-------------------------------------------------------------|-----------------------|----|-------|-------|
| Gene                          |                                                             |                       |    |       |       |
| Ontology - Biological Process | cytokine production                                         | experimental (strong) | 16 | 7.33  | 0.014 |
| Gene                          |                                                             |                       |    |       |       |
| Ontology - Biological Process | divalent metal ion transport                                | experimental (strong) | 9  | 2.839 | 0.014 |
| Gene                          |                                                             |                       |    |       |       |
| Ontology - Biological Process | innate immune response                                      | experimental (strong) | 15 | 6.582 | 0.014 |
| Gene                          |                                                             |                       |    |       |       |
| Ontology - Biological Process | positive regulation of apoptotic process                    | experimental (strong) | 16 | 7.356 | 0.014 |
| Gene                          |                                                             |                       |    |       |       |
| Ontology - Biological Process | positive regulation of cell cycle                           | experimental (strong) | 11 | 4.001 | 0.014 |
| Gene                          |                                                             |                       |    |       |       |
| Ontology - Biological Process | positive regulation of epithelial to mesenchymal transition | experimental (strong) | 5  | 0.903 | 0.014 |
| Gene                          |                                                             |                       |    |       |       |
| Ontology - Biological Process | positive regulation of mononuclear cell migration           | experimental (strong) | 3  | 0.258 | 0.014 |
| Gene                          |                                                             |                       |    |       |       |
| Ontology - Biological Process | positive regulation of peptidyl-lysine acetylation          | experimental (strong) | 4  | 0.542 | 0.014 |
| Gene                          |                                                             |                       |    |       |       |
| Ontology - Biological Process | positive regulation of type I interferon production         | experimental (strong) | 5  | 0.903 | 0.014 |



|                               |                                                 |                       |    |       |       |
|-------------------------------|-------------------------------------------------|-----------------------|----|-------|-------|
| Gene                          | prostaglandin                                   |                       |    |       |       |
| Ontology - Biological Process | metabolic process                               | experimental (strong) | 3  | 0.258 | 0.014 |
| Gene                          | regulation of ERK1 and ERK2 cascade             |                       |    |       |       |
| Ontology - Biological Process | regulation of ERK1 and ERK2 cascade             | experimental (strong) | 10 | 3.433 | 0.014 |
| Gene                          | regulation of T cell activation                 |                       |    |       |       |
| Ontology - Biological Process | regulation of T cell activation                 | experimental (strong) | 10 | 3.407 | 0.014 |
| Gene                          | regulation of peptidyl-tyrosine phosphorylation |                       |    |       |       |
| Ontology - Biological Process | regulation of peptidyl-tyrosine phosphorylation | experimental (strong) | 9  | 2.813 | 0.014 |
| Gene                          | response to hormone                             |                       |    |       |       |
| Ontology - Biological Process | response to hormone                             | experimental (strong) | 19 | 9.55  | 0.014 |
| Gene                          | toll-like receptor 9 signaling pathway          |                       |    |       |       |
| Ontology - Biological Process | toll-like receptor 9 signaling pathway          | experimental (strong) | 3  | 0.258 | 0.014 |
| Gene                          | ventricular cardiac muscle tissue morphogenesis |                       |    |       |       |
| Ontology - Biological Process | ventricular cardiac muscle tissue morphogenesis | experimental (strong) | 4  | 0.542 | 0.014 |
| Gene                          | T cell mediated immunity                        |                       |    |       |       |
| Ontology - Biological Process | T cell mediated immunity                        | experimental (any)    | 5  | 1.023 | 0.014 |
| Gene                          | aging                                           |                       |    |       |       |
| Ontology - Biological Process | aging                                           | experimental (any)    | 10 | 3.641 | 0.014 |
| Gene                          | endoderm formation                              |                       |    |       |       |
| Ontology - Biological Process | endoderm formation                              | experimental (any)    | 4  | 0.638 | 0.014 |

|            |              |           |    |       |       |
|------------|--------------|-----------|----|-------|-------|
| Gene       |              |           |    |       |       |
| Ontology - | extracellul  |           |    |       |       |
| Biological | ar matrix    | experimen |    |       |       |
| Process    | assembly     | tal (any) | 3  | 0.319 | 0.014 |
|            | positive     |           |    |       |       |
|            | regulation   |           |    |       |       |
| Gene       | of cell      |           |    |       |       |
| Ontology - | cycle        |           |    |       |       |
| Biological | phase        | experimen |    |       |       |
| Process    | transition   | tal (any) | 5  | 1.036 | 0.014 |
|            | positive     |           |    |       |       |
|            | regulation   |           |    |       |       |
| Gene       | of focal     |           |    |       |       |
| Ontology - | adhesion     | experimen |    |       |       |
| Biological | assembly     | tal (any) | 3  | 0.319 | 0.014 |
| Process    |              |           |    |       |       |
|            | positive     |           |    |       |       |
|            | regulation   |           |    |       |       |
| Gene       | of myeloid   |           |    |       |       |
| Ontology - | leukocyte    |           |    |       |       |
| Biological | differentia  | experimen |    |       |       |
| Process    | tion         | tal (any) | 4  | 0.638 | 0.014 |
|            | regulation   |           |    |       |       |
|            | of intrinsic |           |    |       |       |
| Gene       |              |           |    |       |       |
| Ontology - | apoptotic    |           |    |       |       |
| Biological | signaling    | experimen |    |       |       |
| Process    | pathway      | tal (any) | 7  | 1.966 | 0.014 |
|            | regulation   |           |    |       |       |
| Gene       | of           |           |    |       |       |
| Ontology - | lymphocyt    |           |    |       |       |
| Biological | e            | experimen |    |       |       |
| Process    | migration    | tal (any) | 4  | 0.638 | 0.014 |
|            | regulation   |           |    |       |       |
|            | of           |           |    |       |       |
| Gene       | supramole    |           |    |       |       |
| Ontology - | cular fiber  |           |    |       |       |
| Biological | organizati   | experimen |    |       |       |
| Process    | on           | tal (any) | 10 | 3.627 | 0.014 |
|            | regulation   |           |    |       |       |
| Gene       | of           |           |    |       |       |
| Ontology - | vasoconst    |           |    |       |       |
| Biological | riktion      | experimen |    |       |       |
| Process    |              | tal (any) | 4  | 0.638 | 0.014 |
|            | activation   |           |    |       |       |
| Gene       | of protein   |           |    |       |       |
| Ontology - |              | experimen |    |       |       |
| Biological | kinase       | tal       |    |       |       |
| Process    | activity     | (strong)  | 11 | 4.104 | 0.015 |

|            |                            |    |       |       |  |
|------------|----------------------------|----|-------|-------|--|
| Gene       |                            |    |       |       |  |
| Ontology - | experimen                  |    |       |       |  |
| Biological | tal                        |    |       |       |  |
| Process    | ic process (strong)        | 48 | 35.88 | 0.015 |  |
| Gene       | cellular                   |    |       |       |  |
| Ontology - | nitrogen                   |    |       |       |  |
| Biological | compound experimen         |    |       |       |  |
| Process    | tal                        |    |       |       |  |
| Process    | metabolic process (strong) | 47 | 34.74 | 0.015 |  |
| Gene       |                            |    |       |       |  |
| Ontology - | cyclooxyg                  |    |       |       |  |
| Biological | enase                      |    |       |       |  |
| Process    | tal                        |    |       |       |  |
| Process    | pathway (strong)           | 2  | 0.077 | 0.015 |  |
| Gene       | divalent                   |    |       |       |  |
| Ontology - | inorganic                  |    |       |       |  |
| Biological | experimen                  |    |       |       |  |
| Process    | tal                        |    |       |       |  |
| Process    | cation transport (strong)  | 9  | 2.891 | 0.015 |  |
| Gene       |                            |    |       |       |  |
| Ontology - | experimen                  |    |       |       |  |
| Biological | tal                        |    |       |       |  |
| Process    | gliogenesi                 |    |       |       |  |
| Process    | s (strong)                 | 10 | 3.485 | 0.015 |  |
| Gene       |                            |    |       |       |  |
| Ontology - | lymphocyt                  |    |       |       |  |
| Biological | experimen                  |    |       |       |  |
| Process    | tal                        |    |       |       |  |
| Process    | migration (strong)         | 5  | 0.929 | 0.015 |  |
| Gene       | lymphocyt                  |    |       |       |  |
| Ontology - | e                          |    |       |       |  |
| Biological | experimen                  |    |       |       |  |
| Process    | tal                        |    |       |       |  |
| Process    | proliferatio               |    |       |       |  |
| Process    | n (strong)                 | 9  | 2.942 | 0.015 |  |
| Gene       |                            |    |       |       |  |
| Ontology - | monocyte                   |    |       |       |  |
| Biological | experimen                  |    |       |       |  |
| Process    | tal                        |    |       |       |  |
| Process    | chemotaxi                  |    |       |       |  |
| Process    | s (strong)                 | 4  | 0.568 | 0.015 |  |
| Gene       |                            |    |       |       |  |
| Ontology - | experimen                  |    |       |       |  |
| Biological | tal                        |    |       |       |  |
| Process    | necrotic                   |    |       |       |  |
| Process    | cell death (strong)        | 4  | 0.568 | 0.015 |  |
| Gene       | neurotran                  |    |       |       |  |
| Ontology - | mitter                     |    |       |       |  |
| Biological | experimen                  |    |       |       |  |
| Process    | tal                        |    |       |       |  |
| Process    | metabolic process (strong) | 6  | 1.342 | 0.015 |  |

|                                             |                                                                                                                                            |    |       |       |
|---------------------------------------------|--------------------------------------------------------------------------------------------------------------------------------------------|----|-------|-------|
| Gene<br>Ontology -<br>Biological<br>Process | nitrogen<br>compound experimen<br>metabolic tal<br>process (strong)                                                                        | 61 | 50.56 | 0.015 |
| Gene<br>Ontology -<br>Biological<br>Process | positive<br>regulation<br>of DNA-<br>binding<br>transcripti experimen<br>on factor tal<br>activity (strong)                                | 10 | 3.51  | 0.015 |
| Gene<br>Ontology -<br>Biological<br>Process | positive<br>regulation<br>of ERK1 experimen<br>and ERK2 tal<br>cascade (strong)                                                            | 8  | 2.375 | 0.015 |
| Gene<br>Ontology -<br>Biological<br>Process | positive<br>regulation<br>of T cell experimen<br>proliferatio tal<br>n (strong)                                                            | 5  | 0.929 | 0.015 |
| Gene<br>Ontology -<br>Biological<br>Process | positive<br>regulation<br>of cellular<br>response<br>to<br>macrophage colony-<br>stimulatin experimen<br>g factor tal<br>stimulus (strong) | 2  | 0.077 | 0.015 |
| Gene<br>Ontology -<br>Biological<br>Process | positive<br>regulation<br>of<br>interleukin- experimen<br>12 tal<br>production (strong)                                                    | 4  | 0.568 | 0.015 |

|      |                                              |                       |    |       |       |
|------|----------------------------------------------|-----------------------|----|-------|-------|
| Gene | positive regulation of programmed cell death | experimental (strong) | 16 | 7.434 | 0.015 |
| Gene | positive regulation of protein acetylation   | experimental (strong) | 4  | 0.568 | 0.015 |
| Gene | protein-containing complex assembly          | experimental (strong) | 20 | 10.45 | 0.015 |
| Gene | regulation of DNA replication                | experimental (strong) | 5  | 0.929 | 0.015 |
| Gene | regulation of blood vessel size              | experimental (strong) | 6  | 1.342 | 0.015 |
| Gene | regulation of cytoskeleton organization      | experimental (strong) | 11 | 4.13  | 0.015 |
| Gene | regulation of pro-B cell differentiation     | experimental (strong) | 2  | 0.077 | 0.015 |
| Gene | regulation of tube size                      | experimental (strong) | 6  | 1.368 | 0.015 |
| Gene | regulation of vasoconstriction               | experimental (strong) | 4  | 0.568 | 0.015 |

|            |            |                                                     |                       |    |       |       |
|------------|------------|-----------------------------------------------------|-----------------------|----|-------|-------|
| Gene       |            |                                                     |                       |    |       |       |
| Ontology - | Biological | response to UV-A                                    | experimental (strong) | 2  | 0.077 | 0.015 |
| Gene       |            |                                                     |                       |    |       |       |
| Ontology - | Biological | telencephalon cell migration                        | experimental (strong) | 4  | 0.568 | 0.015 |
| Gene       |            |                                                     |                       |    |       |       |
| Ontology - | Biological | wound healing                                       | experimental (strong) | 13 | 5.42  | 0.015 |
| Gene       |            |                                                     |                       |    |       |       |
| Ontology - | Biological | B cell activation                                   | experimental (any)    | 8  | 2.551 | 0.015 |
| Gene       |            |                                                     |                       |    |       |       |
| Ontology - | Biological | Notch signaling pathway                             | experimental (any)    | 7  | 2.02  | 0.015 |
| Gene       |            |                                                     |                       |    |       |       |
| Ontology - | Biological | T cell costimulation                                | experimental (any)    | 4  | 0.651 | 0.015 |
| Gene       |            | TRIF-dependent toll-like receptor signaling pathway |                       |    |       |       |
| Ontology - | Biological | receptor signaling pathway                          | experimental (any)    | 3  | 0.332 | 0.015 |
| Gene       |            |                                                     |                       |    |       |       |
| Ontology - | Biological | cellular nitrogen compound metabolic process        | experimental (any)    | 87 | 68.65 | 0.015 |
| Gene       |            |                                                     |                       |    |       |       |
| Ontology - | Biological | cellular response to decreased oxygen levels        | experimental (any)    | 8  | 2.538 | 0.015 |
| Gene       |            |                                                     |                       |    |       |       |
| Ontology - | Biological | digestive tract development                         | experimental (any)    | 6  | 1.515 | 0.015 |

|                       |                                         |                    |    |       |       |
|-----------------------|-----------------------------------------|--------------------|----|-------|-------|
| Gene                  |                                         |                    |    |       |       |
| Ontology - heart      |                                         |                    |    |       |       |
| Biological Process    | development                             | experimental (any) | 14 | 6.271 | 0.015 |
| Gene                  | negative regulation of                  |                    |    |       |       |
| Ontology - cytokine   |                                         |                    |    |       |       |
| Biological Process    | biosynthetic process                    | experimental (any) | 3  | 0.332 | 0.015 |
| Gene                  |                                         |                    |    |       |       |
| Ontology - neutrophil |                                         |                    |    |       |       |
| Biological Process    | chemotaxis                              | experimental (any) | 4  | 0.651 | 0.015 |
| Gene                  | positive regulation of                  |                    |    |       |       |
| Ontology - of T cell  |                                         |                    |    |       |       |
| Biological Process    | differentiation                         | experimental (any) | 5  | 1.05  | 0.015 |
| Gene                  | positive regulation of establishment of |                    |    |       |       |
| Ontology - protein    |                                         |                    |    |       |       |
| Biological Process    | localization                            | experimental (any) | 12 | 4.956 | 0.015 |
| Gene                  | positive regulation of peptidyl-        |                    |    |       |       |
| Ontology - tyrosine   |                                         |                    |    |       |       |
| Biological Process    | phosphorylation                         | experimental (any) | 7  | 2.02  | 0.015 |
| Gene                  | receptor                                |                    |    |       |       |
| Ontology - signaling  |                                         |                    |    |       |       |
| Biological Process    | pathway via STAT                        | experimental (any) | 6  | 1.501 | 0.015 |
| Gene                  | regulation of blood vessel              |                    |    |       |       |
| Ontology - endothelia |                                         |                    |    |       |       |
| Biological Process    | cell migration                          | experimental (any) | 5  | 1.05  | 0.015 |

|                     |                                                                                |                       |    |       |       |
|---------------------|--------------------------------------------------------------------------------|-----------------------|----|-------|-------|
| Gene                | regulation                                                                     |                       |    |       |       |
| Ontology - of       |                                                                                |                       |    |       |       |
| Biological Process  | fibroblast migration                                                           | experimental (any)    | 3  | 0.332 | 0.015 |
| Gene                | response                                                                       |                       |    |       |       |
| Ontology - to       |                                                                                |                       |    |       |       |
| Biological Process  | angiotensin                                                                    | experimental (any)    | 3  | 0.332 | 0.015 |
| Gene                | response                                                                       |                       |    |       |       |
| Ontology - to       |                                                                                |                       |    |       |       |
| Biological Process  | morphine                                                                       | experimental (any)    | 3  | 0.332 | 0.015 |
| Gene                | regulation of cell size                                                        | predicted (union)     | 75 | 53.1  | 0.016 |
| Ontology - RNA      | biosynthetic process                                                           | experimental (strong) | 38 | 25.99 | 0.016 |
| Biological Process  | drug metabolic process                                                         | experimental (strong) | 10 | 3.562 | 0.016 |
| Gene                | locomotion                                                                     | experimental (strong) | 27 | 16.13 | 0.016 |
| Ontology - ear cell | proliferation                                                                  | experimental (strong) | 9  | 2.968 | 0.016 |
| Biological Process  | pericardium development                                                        | experimental (strong) | 3  | 0.284 | 0.016 |
| Gene                | regulation of extrinsic apoptotic signaling pathway via death domain receptors | experimental (strong) | 5  | 0.955 | 0.016 |
| Ontology - T cell   | extravasation                                                                  | experimental (any)    | 2  | 0.106 | 0.016 |



|            |              |           |    |       |       |
|------------|--------------|-----------|----|-------|-------|
| Gene       | defense      |           |    |       |       |
| Ontology - | response     |           |    |       |       |
| Biological | to           | experimen |    |       |       |
| Process    | bacterium    | tal (any) | 7  | 2.033 | 0.016 |
| Gene       | extracellul  |           |    |       |       |
| Ontology - | ar matrix    |           |    |       |       |
| Biological | organizati   | experimen |    |       |       |
| Process    | on           | tal (any) | 10 | 3.734 | 0.016 |
| Gene       |              |           |    |       |       |
| Ontology - |              |           |    |       |       |
| Biological | gastrulatio  | experimen |    |       |       |
| Process    | n            | tal (any) | 7  | 2.059 | 0.016 |
| Gene       |              |           |    |       |       |
| Ontology - | interleukin- |           |    |       |       |
| Biological | 6            | experimen |    |       |       |
| Process    | production   | tal (any) | 6  | 1.555 | 0.016 |
| Gene       | male         |           |    |       |       |
| Ontology - | gonad        |           |    |       |       |
| Biological | developm     | experimen |    |       |       |
| Process    | ent          | tal (any) | 6  | 1.555 | 0.016 |
| Gene       | marginal     |           |    |       |       |
| Ontology - | zone B       |           |    |       |       |
| Biological | cell         |           |    |       |       |
| Process    | differentia  | experimen |    |       |       |
|            | tion         | tal (any) | 2  | 0.106 | 0.016 |
| Gene       | membran      |           |    |       |       |
| Ontology - | e protein    |           |    |       |       |
| Biological | proteolysi   | experimen |    |       |       |
| Process    | s            | tal (any) | 4  | 0.664 | 0.016 |
| Gene       | negative     |           |    |       |       |
| Ontology - | regulation   |           |    |       |       |
| Biological | of calcium   |           |    |       |       |
| Process    | ion          | experimen |    |       |       |
|            | transport    | tal (any) | 4  | 0.664 | 0.016 |
| Gene       |              |           |    |       |       |
| Ontology - | neural       |           |    |       |       |
| Biological | tube         | experimen |    |       |       |
| Process    | closure      | tal (any) | 5  | 1.076 | 0.016 |
| Gene       | positive     |           |    |       |       |
| Ontology - | regulation   |           |    |       |       |
| Biological | of histone   |           |    |       |       |
| Process    | H3-K9        |           |    |       |       |
|            | acetylatio   | experimen |    |       |       |
|            | n            | tal (any) | 2  | 0.106 | 0.016 |

|                    |                                                       |                    |    |       |       |
|--------------------|-------------------------------------------------------|--------------------|----|-------|-------|
| Gene               | positive regulation                                   |                    |    |       |       |
| Ontology -         | of                                                    |                    |    |       |       |
| Biological Process | ossification                                          | experimental (any) | 5  | 1.076 | 0.016 |
| Gene               | positive regulation                                   |                    |    |       |       |
| Ontology -         | of                                                    |                    |    |       |       |
| Biological Process | transport                                             | experimental (any) | 20 | 10.54 | 0.016 |
| Gene               | regulation of G protein-coupled receptor              |                    |    |       |       |
| Ontology -         | signaling pathway                                     |                    |    |       |       |
| Biological Process |                                                       | experimental (any) | 6  | 1.555 | 0.016 |
| Gene               | regulation of cellular component                      |                    |    |       |       |
| Ontology -         | organization                                          |                    |    |       |       |
| Biological Process |                                                       | experimental (any) | 40 | 26.45 | 0.016 |
| Gene               | regulation of extracellular matrix assembly           |                    |    |       |       |
| Ontology -         |                                                       |                    |    |       |       |
| Biological Process |                                                       | experimental (any) | 2  | 0.106 | 0.016 |
| Gene               | regulation of histone acetylation                     |                    |    |       |       |
| Ontology -         |                                                       |                    |    |       |       |
| Biological Process |                                                       | experimental (any) | 4  | 0.678 | 0.016 |
| Gene               | regulation of macrophage activation                   |                    |    |       |       |
| Ontology -         |                                                       |                    |    |       |       |
| Biological Process |                                                       | experimental (any) | 4  | 0.678 | 0.016 |
| Gene               | regulation of protein localization to plasma membrane |                    |    |       |       |
| Ontology -         |                                                       |                    |    |       |       |
| Biological Process |                                                       | experimental (any) | 5  | 1.076 | 0.016 |

|            |             |             |     |       |       |
|------------|-------------|-------------|-----|-------|-------|
| Gene       |             |             |     |       |       |
| Ontology - |             |             |     |       |       |
| Biological | response    | experimen   |     |       |       |
| Process    | to nutrient | tal (any)   | 8   | 2.578 | 0.016 |
|            | transmem    |             |     |       |       |
|            | brane       |             |     |       |       |
|            | receptor    |             |     |       |       |
|            | protein     |             |     |       |       |
|            | serine/thr  |             |     |       |       |
| Gene       | eonine      |             |     |       |       |
| Ontology - | kinase      |             |     |       |       |
| Biological | signaling   | experimen   |     |       |       |
| Process    | pathway     | tal (any)   | 10  | 3.734 | 0.016 |
|            | ventricular |             |     |       |       |
|            | cardiac     |             |     |       |       |
| Gene       | muscle      |             |     |       |       |
| Ontology - | tissue      |             |     |       |       |
| Biological | developm    | experimen   |     |       |       |
| Process    | ent         | tal (any)   | 4   | 0.664 | 0.016 |
|            | cellular    |             |     |       |       |
|            | response    |             |     |       |       |
| Gene       | to          |             |     |       |       |
| Ontology - | organonitr  | predicted   |     |       |       |
| Biological | ogen        | (intersecti |     |       |       |
| Process    | compound    | on)         | 121 | 87.5  | 0.017 |
| Gene       |             |             |     |       |       |
| Ontology - | forebrain   | experimen   |     |       |       |
| Biological | cell        | tal         |     |       |       |
| Process    | migration   | (strong)    | 4   | 0.594 | 0.017 |
| Gene       |             |             |     |       |       |
| Ontology - | leukocyte   | experimen   |     |       |       |
| Biological | degranula   | tal         |     |       |       |
| Process    | tion        | (strong)    | 10  | 3.588 | 0.017 |
| Gene       |             |             |     |       |       |
| Ontology - | nitric      |             |     |       |       |
| Biological | oxide       | experimen   |     |       |       |
| Process    | biosynthes  | tal         |     |       |       |
|            | ic process  | (strong)    | 5   | 0.981 | 0.017 |
|            | positive    |             |     |       |       |
|            | regulation  |             |     |       |       |
|            | of          |             |     |       |       |
|            | cytokine    |             |     |       |       |
| Gene       | production  |             |     |       |       |
| Ontology - | involved in | experimen   |     |       |       |
| Biological | immune      | tal         |     |       |       |
| Process    | response    | (strong)    | 4   | 0.594 | 0.017 |

|            |                     |           |    |       |       |
|------------|---------------------|-----------|----|-------|-------|
| Gene       | positive regulation |           |    |       |       |
| Ontology - | of gene             | experimen |    |       |       |
| Biological | expressio           | tal       |    |       |       |
| Process    | n                   | (strong)  | 30 | 18.84 | 0.017 |
| Gene       | regulation          |           |    |       |       |
| Ontology - | of G                |           |    |       |       |
| Biological | protein-            |           |    |       |       |
| Process    | coupled             |           |    |       |       |
| Gene       | receptor            | experimen |    |       |       |
| Ontology - | signaling           | tal       |    |       |       |
| Biological | pathway             | (strong)  | 5  | 0.981 | 0.017 |
| Process    |                     |           |    |       |       |
| Gene       | regulation          |           |    |       |       |
| Ontology - | of protein          | experimen |    |       |       |
| Biological | kinase              | tal       |    |       |       |
| Process    | activity            | (strong)  | 17 | 8.311 | 0.017 |
| Gene       | adherens            |           |    |       |       |
| Ontology - | junction            | experimen |    |       |       |
| Biological | assembly            | tal (any) | 5  | 1.103 | 0.017 |
| Process    | developm            |           |    |       |       |
| Gene       | ent of              |           |    |       |       |
| Ontology - | primary             |           |    |       |       |
| Biological | male                |           |    |       |       |
| Process    | sexual              |           |    |       |       |
| Gene       | characteri          | experimen |    |       |       |
| Ontology - | stics               | tal (any) | 6  | 1.568 | 0.017 |
| Biological |                     |           |    |       |       |
| Process    |                     |           |    |       |       |
| Gene       | granulocyt          |           |    |       |       |
| Ontology - | e                   | experimen |    |       |       |
| Biological | migration           | tal (any) | 5  | 1.103 | 0.017 |
| Process    | mammary             |           |    |       |       |
| Gene       | gland               |           |    |       |       |
| Ontology - | epithelial          |           |    |       |       |
| Biological | cell                |           |    |       |       |
| Process    | proliferatio        | experimen |    |       |       |
| Gene       | n                   | tal (any) | 3  | 0.345 | 0.017 |
| Ontology - |                     |           |    |       |       |
| Biological |                     |           |    |       |       |
| Process    |                     |           |    |       |       |
| Gene       | positive            |           |    |       |       |
| Ontology - | regulation          |           |    |       |       |
| Biological | of                  |           |    |       |       |
| Process    | response            |           |    |       |       |
| Gene       | to                  | experimen |    |       |       |
| Ontology - | wounding            | tal (any) | 4  | 0.691 | 0.017 |
| Biological |                     |           |    |       |       |
| Process    |                     |           |    |       |       |

|                                             |                                                                         |                               |    |       |       |
|---------------------------------------------|-------------------------------------------------------------------------|-------------------------------|----|-------|-------|
| Gene<br>Ontology -<br>Biological<br>Process | regulation<br>of<br>cysteine-<br>type<br>endopepti-<br>dase<br>activity | experimen-<br>tal (any)       | 8  | 2.618 | 0.017 |
| Gene<br>Ontology -<br>Biological<br>Process | regulation<br>of<br>immunogl-<br>obulin<br>production                   | experimen-<br>tal (any)       | 4  | 0.691 | 0.017 |
| Gene<br>Ontology -<br>Biological<br>Process | response<br>to X-ray                                                    | experimen-<br>tal (any)       | 3  | 0.345 | 0.017 |
| Gene<br>Ontology -<br>Biological<br>Process | response<br>to<br>gonadotro-<br>pin                                     | experimen-<br>tal (any)       | 3  | 0.345 | 0.017 |
| Gene<br>Ontology -<br>Biological<br>Process | heart<br>valve<br>morphoge-<br>nesis                                    | experimen-<br>tal<br>(strong) | 5  | 1.007 | 0.018 |
| Gene<br>Ontology -<br>Biological<br>Process | lymphocyt-<br>e<br>activation                                           | experimen-<br>tal<br>(strong) | 15 | 6.969 | 0.018 |
| Gene<br>Ontology -<br>Biological<br>Process | membran-<br>e protein<br>proteolysi-<br>s                               | experimen-<br>tal<br>(strong) | 4  | 0.619 | 0.018 |
| Gene<br>Ontology -<br>Biological<br>Process | negative<br>regulation<br>of<br>leukocyte<br>apoptotic<br>process       | experimen-<br>tal<br>(strong) | 4  | 0.619 | 0.018 |

nucleotide-binding domain, leucine rich repeat containing receptor signaling pathway (strong) 4 0.619 0.018

nucleotide-binding oligomerization domain containing signaling pathway (strong) 4 0.619 0.018

positive regulation of RNA biosynthetic process (strong) 26 15.51 0.018

positive regulation of nucleic acid-templated transcription (strong) 26 15.51 0.018

protein secretion (strong) 12 4.878 0.018

regulation of lymphocyte migration (strong) 4 0.619 0.018

|                    |                                                    |                    |    |       |       |
|--------------------|----------------------------------------------------|--------------------|----|-------|-------|
| Gene               | stress-activated protein kinase                    | experimental       |    |       |       |
| Biological Process | signaling cascade                                  | (strong)           | 10 | 3.639 | 0.018 |
| Gene               | animal morphogenesis                               | experimental (any) | 21 | 11.48 | 0.018 |
| Biological Process | cardiocyte differentiation                         | experimental (any) | 6  | 1.608 | 0.018 |
| Gene               | cellular response to dexamethasone                 | experimental (any) | 3  | 0.359 | 0.018 |
| Biological Process | epithelial morphogenesis                           | experimental (any) | 10 | 3.84  | 0.018 |
| Gene               | female gonadal development                         | experimental (any) | 5  | 1.129 | 0.018 |
| Biological Process | morphogenesis of an epithelium                     | experimental (any) | 14 | 6.431 | 0.018 |
| Gene               | negative regulation of angiogenesis                | experimental (any) | 5  | 1.129 | 0.018 |
| Biological Process | positive regulation of apoptotic signaling pathway | experimental (any) | 7  | 2.099 | 0.018 |

|                                             |                                                                     |                        |    |       |       |
|---------------------------------------------|---------------------------------------------------------------------|------------------------|----|-------|-------|
| Gene<br>Ontology -<br>Biological<br>Process | positive<br>regulation<br>of<br>cytokine<br>biosynthetic<br>process | experimen<br>tal (any) | 4  | 0.704 | 0.018 |
| Gene<br>Ontology -<br>Biological<br>Process | positive<br>regulation<br>of<br>erythrocyte<br>differentiation      | experimen<br>tal (any) | 3  | 0.359 | 0.018 |
| Gene<br>Ontology -<br>Biological<br>Process | positive<br>regulation<br>of histone<br>modification                | experimen<br>tal (any) | 5  | 1.116 | 0.018 |
| Gene<br>Ontology -<br>Biological<br>Process | positive<br>regulation<br>of interferon-<br>beta<br>production      | experimen<br>tal (any) | 3  | 0.359 | 0.018 |
| Gene<br>Ontology -<br>Biological<br>Process | positive<br>regulation<br>of protein<br>transport                   | experimen<br>tal (any) | 11 | 4.478 | 0.018 |
| Gene<br>Ontology -<br>Biological<br>Process | regulation<br>of actin<br>filament<br>bundle<br>assembly            | experimen<br>tal (any) | 5  | 1.116 | 0.018 |
| Gene<br>Ontology -<br>Biological<br>Process | regulation<br>of cell<br>junction<br>assembly                       | experimen<br>tal (any) | 5  | 1.116 | 0.018 |
| Gene<br>Ontology -<br>Biological<br>Process | regulation<br>of<br>interleukin-<br>8<br>production                 | experimen<br>tal (any) | 4  | 0.704 | 0.018 |



|                           |                                       |                       |    |       |       |
|---------------------------|---------------------------------------|-----------------------|----|-------|-------|
| Gene                      |                                       |                       |    |       |       |
| Ontology - response       |                                       |                       |    |       |       |
| Biological Process        | to wounding                           | experimental (any)    | 15 | 7.109 | 0.018 |
| Gene                      |                                       |                       |    |       |       |
| Ontology - stress         |                                       |                       |    |       |       |
| Biological Process        | fiber assembly                        | experimental (any)    | 5  | 1.116 | 0.018 |
| Gene                      | superoxid                             |                       |    |       |       |
| Ontology - e anion        |                                       |                       |    |       |       |
| Biological Process        | generation                            | experimental (any)    | 3  | 0.359 | 0.018 |
| Gene                      |                                       |                       |    |       |       |
| Ontology - ERK1 and ERK2  |                                       |                       |    |       |       |
| Biological Process        | cascade                               | experimental (strong) | 10 | 3.665 | 0.019 |
| Gene                      |                                       |                       |    |       |       |
| Ontology - T cell         |                                       |                       |    |       |       |
| Biological Process        | proliferation                         | experimental (strong) | 7  | 1.962 | 0.019 |
| Gene                      |                                       |                       |    |       |       |
| Ontology - icosanoid      |                                       |                       |    |       |       |
| Biological Process        | biosynthetic process                  | experimental (strong) | 3  | 0.310 | 0.019 |
| Gene                      |                                       |                       |    |       |       |
| Ontology - immunoglobulin |                                       |                       |    |       |       |
| Biological Process        | secretion                             | experimental (strong) | 3  | 0.310 | 0.019 |
|                           | negative regulation of                |                       |    |       |       |
| Gene                      | biomineral                            |                       |    |       |       |
| Ontology - tissue         |                                       |                       |    |       |       |
| Biological Process        | development                           | experimental (strong) | 3  | 0.310 | 0.019 |
|                           | negative regulation of cell migration |                       |    |       |       |
| Gene                      | involved in                           |                       |    |       |       |
| Ontology - sprouting      |                                       |                       |    |       |       |
| Biological Process        | angiogenesis                          | experimental (strong) | 3  | 0.310 | 0.019 |

|                    |                                                          |              |    |       |       |
|--------------------|----------------------------------------------------------|--------------|----|-------|-------|
| Gene               | positive regulation of nitric-oxide synthase             | experimental |    |       |       |
| Biological Process | biosynthetic process                                     | (strong)     | 3  | 0.310 | 0.019 |
| Gene               | regulation of protein secretion                          | experimental |    |       |       |
| Biological Process | secretion                                                | (strong)     | 11 | 4.285 | 0.019 |
| Gene               | unsaturated fatty acid biosynthesis                      | experimental |    |       |       |
| Biological Process | biosynthetic process                                     | (strong)     | 3  | 0.310 | 0.019 |
| Gene               | adherens junction organization                           | experimental |    |       |       |
| Biological Process | organization                                             | any          | 6  | 1.634 | 0.019 |
| Gene               | cardiac atrium morphogenesis                             | experimental |    |       |       |
| Biological Process | morphogenesis                                            | any          | 3  | 0.372 | 0.019 |
| Gene               | cellular response to insulin-like growth factor stimulus | experimental |    |       |       |
| Biological Process | stimulus                                                 | any          | 2  | 0.120 | 0.019 |
| Gene               | coronary artery morphogenesis                            | experimental |    |       |       |
| Biological Process | morphogenesis                                            | any          | 2  | 0.120 | 0.019 |
| Gene               | detection of molecule of bacterial origin                | experimental |    |       |       |
| Biological Process | origin                                                   | any          | 2  | 0.120 | 0.019 |
| Gene               | digestive system development                             | experimental |    |       |       |
| Biological Process | development                                              | any          | 6  | 1.634 | 0.019 |

|                         |                                                                                  |                     |    |       |       |
|-------------------------|----------------------------------------------------------------------------------|---------------------|----|-------|-------|
| Gene                    |                                                                                  |                     |    |       |       |
| Ontology - histone      |                                                                                  |                     |    |       |       |
| Biological Process      | monoubiq uitination                                                              | experimen tal (any) | 3  | 0.372 | 0.019 |
| Gene                    |                                                                                  |                     |    |       |       |
| Ontology -              |                                                                                  |                     |    |       |       |
| Biological Process      | homeostat ic process                                                             | experimen tal (any) | 31 | 19.32 | 0.019 |
| Gene                    |                                                                                  |                     |    |       |       |
| Ontology - interleukin- |                                                                                  |                     |    |       |       |
| Biological Process      | 17 production                                                                    | experimen tal (any) | 3  | 0.372 | 0.019 |
| Gene                    | lateral                                                                          |                     |    |       |       |
| Ontology - ventricle    |                                                                                  |                     |    |       |       |
| Biological Process      | developm ent                                                                     | experimen tal (any) | 2  | 0.120 | 0.019 |
| Gene                    |                                                                                  |                     |    |       |       |
| Ontology -              |                                                                                  |                     |    |       |       |
| Biological Process      | negative regulation of intrinsic apoptotic signaling pathway                     | experimen tal (any) | 5  | 1.143 | 0.019 |
| Gene                    | nervous system                                                                   |                     |    |       |       |
| Ontology - system       |                                                                                  |                     |    |       |       |
| Biological Process      | developm ent                                                                     | experimen tal (any) | 38 | 25.1  | 0.019 |
| Gene                    |                                                                                  |                     |    |       |       |
| Ontology -              |                                                                                  |                     |    |       |       |
| Biological Process      | positive regulation of cell cycle process                                        | experimen tal (any) | 9  | 3.282 | 0.019 |
| Gene                    |                                                                                  |                     |    |       |       |
| Ontology -              |                                                                                  |                     |    |       |       |
| Biological Process      | positive regulation of cyclin-dependent protein serine/threonine kinase activity | experimen tal (any) | 3  | 0.372 | 0.019 |
| Gene                    |                                                                                  |                     |    |       |       |
| Ontology - of           |                                                                                  |                     |    |       |       |
| Biological Process      | neurogen esis                                                                    | experimen tal (any) | 12 | 5.182 | 0.019 |

|                                    |                                                                                      |                    |   |       |       |
|------------------------------------|--------------------------------------------------------------------------------------|--------------------|---|-------|-------|
| Gene Ontology - Biological Process | positive regulation of production of miRNAs involved in gene silencing by miRNA      | experimental (any) | 2 | 0.120 | 0.019 |
| Gene Ontology - Biological Process | regulation of T cell cytokine production                                             | experimental (any) | 3 | 0.372 | 0.019 |
| Gene Ontology - Biological Process | regulation of actin filament organization                                            | experimental (any) | 8 | 2.697 | 0.019 |
| Gene Ontology - Biological Process | regulation of myeloid cell apoptotic process                                         | experimental (any) | 3 | 0.372 | 0.019 |
| Gene Ontology - Biological Process | regulation of nucleotide-binding oligomerization domain containing signaling pathway | experimental (any) | 2 | 0.120 | 0.019 |
| Gene Ontology - Biological Process | regulation of superoxide metabolic process                                           | experimental (any) | 3 | 0.372 | 0.019 |

|            |                     |                       |     |       |       |
|------------|---------------------|-----------------------|-----|-------|-------|
| Gene       | response to         |                       |     |       |       |
| Ontology - | temperature         |                       |     |       |       |
| Biological | response            | experimental (any)    | 8   | 2.697 | 0.019 |
| Process    | stimulus regulation |                       |     |       |       |
| Gene       | of                  |                       |     |       |       |
| Ontology - | intracellular       |                       |     |       |       |
| Biological | protein transport   | predicted (union)     | 109 | 82.39 | 0.020 |
| Process    |                     |                       |     |       |       |
| Gene       |                     |                       |     |       |       |
| Ontology - |                     | experimental          |     |       |       |
| Biological | DNA replication     | (strong)              | 7   | 2.013 | 0.020 |
| Process    |                     |                       |     |       |       |
| Gene       |                     |                       |     |       |       |
| Ontology - |                     | experimental          |     |       |       |
| Biological | T cell activation   | (strong)              | 12  | 5.007 | 0.020 |
| Process    | actin               |                       |     |       |       |
| Gene       | polymeriz           |                       |     |       |       |
| Ontology - | ation or            | experimental          |     |       |       |
| Biological | depolymer           | ization (strong)      | 5   | 1.032 | 0.020 |
| Process    |                     |                       |     |       |       |
| Gene       |                     |                       |     |       |       |
| Ontology - | icosanoid           | experimental          |     |       |       |
| Biological | metabolic           | (strong)              | 4   | 0.645 | 0.020 |
| Process    | process             |                       |     |       |       |
| Gene       |                     |                       |     |       |       |
| Ontology - | macrophage          | experimental          |     |       |       |
| Biological | activation          | (strong)              | 5   | 1.032 | 0.020 |
| Process    | negative regulation |                       |     |       |       |
| Gene       | of                  |                       |     |       |       |
| Ontology - | endothelial         | experimental          |     |       |       |
| Biological | cell migration      | (strong)              | 4   | 0.645 | 0.020 |
| Process    |                     |                       |     |       |       |
| Gene       | pattern             |                       |     |       |       |
| Ontology - | recognition         |                       |     |       |       |
| Biological | receptor signaling  | experimental (strong) | 7   | 2.013 | 0.020 |
| Process    | pathway             |                       |     |       |       |
| Gene       | positive            |                       |     |       |       |
| Ontology - | regulation          | experimental          |     |       |       |
| Biological | of protein          | (strong)              | 8   | 2.555 | 0.020 |
| Process    | secretion           |                       |     |       |       |

Gene regulation  
 of actin  
 Ontology - filament experimen  
 Biological organizati tal  
 Process on (strong) 7 1.987 0.020

Gene regulation  
 of  
 cytokine  
 production  
 Ontology - involved in experimen  
 Biological immune tal  
 Process response (strong) 5 1.032 0.020

Gene  
 Ontology - transcripti experimen  
 Biological on, DNA- tal  
 Process templated (strong) 37 25.55 0.020

Gene  
 Ontology - activation  
 Biological of MAPK experimen  
 Process activity tal (any) 7 2.166 0.020

Gene cardiac  
 muscle  
 Ontology - tissue  
 Biological morphoge experimen  
 Process nesis tal (any) 4 0.731 0.020

Gene cellular  
 Ontology - componen  
 Biological t experimen  
 Process assembly tal (any) 44 30.41 0.020

Gene cellular  
 response  
 to  
 Ontology - organonitr  
 Biological ogen experimen  
 Process compound tal (any) 14 6.551 0.020

Gene  
 Ontology - epithelial  
 Biological cell experimen  
 Process migration tal (any) 9 3.335 0.020

Gene  
 Ontology - histone  
 Biological modificati experimen  
 Process on tal (any) 12 5.222 0.020

|                                             |                                                                          |                        |   |       |       |
|---------------------------------------------|--------------------------------------------------------------------------|------------------------|---|-------|-------|
| Gene<br>Ontology -<br>Biological<br>Process | hormone<br>secretion                                                     | experimen<br>tal (any) | 9 | 3.322 | 0.020 |
| Gene<br>Ontology -<br>Biological<br>Process | liver<br>regenerati<br>on                                                | experimen<br>tal (any) | 3 | 0.385 | 0.020 |
| Gene<br>Ontology -<br>Biological<br>Process | negative<br>regulation<br>of cellular<br>response<br>to growth<br>factor | experimen<br>tal (any) | 6 | 1.648 | 0.020 |
| Gene<br>Ontology -<br>Biological<br>Process | peptidyl-<br>serine<br>phosphory<br>lation                               | experimen<br>tal (any) | 8 | 2.724 | 0.020 |
| Gene<br>Ontology -<br>Biological<br>Process | positive<br>regulation<br>of BMP<br>signaling<br>pathway                 | experimen<br>tal (any) | 3 | 0.385 | 0.020 |
| Gene<br>Ontology -<br>Biological<br>Process | positive<br>regulation<br>of<br>epithelial<br>cell<br>proliferatio<br>n  | experimen<br>tal (any) | 7 | 2.179 | 0.020 |
| Gene<br>Ontology -<br>Biological<br>Process | positive<br>regulation<br>of<br>interleukin-<br>10<br>production         | experimen<br>tal (any) | 3 | 0.385 | 0.020 |
| Gene<br>Ontology -<br>Biological<br>Process | positive<br>regulation<br>of<br>lymphocyt<br>e<br>differentia<br>tion    | experimen<br>tal (any) | 5 | 1.169 | 0.020 |

|                                    |                                                   |                          |     |       |       |
|------------------------------------|---------------------------------------------------|--------------------------|-----|-------|-------|
| Gene Ontology - Biological Process | positive regulation of synaptic transmission      | experimental (any)       | 6   | 1.661 | 0.020 |
| Gene Ontology - Biological Process | regulation of T cell differentiation              | experimental (any)       | 6   | 1.661 | 0.020 |
| Gene Ontology - Biological Process | response to transforming growth factor beta       | experimental (any)       | 8   | 2.737 | 0.020 |
| Gene Ontology - Biological Process | signal transduction in response to DNA damage     | experimental (any)       | 6   | 1.648 | 0.020 |
| Gene Ontology - Biological Process | toll-like receptor 4 signaling pathway            | experimental (any)       | 3   | 0.385 | 0.020 |
| Gene Ontology - Biological Process | negative regulation of cellular metabolic process | predicted (intersection) | 430 | 367.7 | 0.021 |
| Gene Ontology - Biological Process | regulation of cytoskeleton organization           | predicted (union)        | 199 | 162.4 | 0.021 |
| Gene Ontology - Biological Process | regulation of dephosphorylation                   | predicted (union)        | 93  | 68.72 | 0.021 |



|                                    |                                                             |                       |    |       |       |
|------------------------------------|-------------------------------------------------------------|-----------------------|----|-------|-------|
| Gene Ontology - Biological Process | positive regulation of adaptive immune response             | experimental (strong) | 5  | 1.058 | 0.021 |
| Gene Ontology - Biological Process | regulation of RNA biosynthetic process                      | experimental (strong) | 37 | 25.63 | 0.021 |
| Gene Ontology - Biological Process | regulation of gliogenesis                                   | experimental (strong) | 6  | 1.523 | 0.021 |
| Gene Ontology - Biological Process | development of primary female sexual characteristics        | experimental (any)    | 5  | 1.183 | 0.021 |
| Gene Ontology - Biological Process | transition of mesenchymal epithelium                        | experimental (any)    | 6  | 1.674 | 0.021 |
| Gene Ontology - Biological Process | migration of epithelium                                     | experimental (any)    | 9  | 3.362 | 0.021 |
| Gene Ontology - Biological Process | negative regulation of RNA biosynthetic process             | experimental (any)    | 23 | 13.25 | 0.021 |
| Gene Ontology - Biological Process | negative regulation of nucleic acid-templated transcription | experimental (any)    | 23 | 13.23 | 0.021 |

|                    |                                                              |                          |    |       |       |
|--------------------|--------------------------------------------------------------|--------------------------|----|-------|-------|
| Gene               | negative regulation of protein                               |                          |    |       |       |
| Biological Process | metabolic process                                            | experimental (any)       | 21 | 11.68 | 0.021 |
| Gene               | neutrophil migration                                         |                          |    |       |       |
| Biological Process | neutrophil migration                                         | experimental (any)       | 4  | 0.757 | 0.021 |
| Gene               | regulation of toll-like receptor signaling pathway           |                          |    |       |       |
| Biological Process | regulation of toll-like receptor signaling pathway           | experimental (any)       | 4  | 0.757 | 0.021 |
| Gene               | ureteric bud development                                     |                          |    |       |       |
| Biological Process | ureteric bud development                                     | experimental (any)       | 5  | 1.196 | 0.021 |
| Gene               | cellular response to platelet-derived growth factor stimulus |                          |    |       |       |
| Biological Process | cellular response to platelet-derived growth factor stimulus | predicted (intersection) | 11 | 3.4   | 0.022 |
| Gene               | netrin-activated signaling pathway                           |                          |    |       |       |
| Biological Process | netrin-activated signaling pathway                           | predicted (intersection) | 8  | 1.968 | 0.022 |
| Gene               | cell proliferation involved in heart valve development       |                          |    |       |       |
| Biological Process | cell proliferation involved in heart valve development       | experimental (strong)    | 2  | 0.103 | 0.022 |
| Gene               | heart valve development                                      |                          |    |       |       |
| Biological Process | heart valve development                                      | experimental (strong)    | 5  | 1.084 | 0.022 |
| Gene               | interleukin-6-mediated signaling pathway                     |                          |    |       |       |
| Biological Process | interleukin-6-mediated signaling pathway                     | experimental (strong)    | 3  | 0.336 | 0.022 |

|                               |                                                              |                       |    |       |       |
|-------------------------------|--------------------------------------------------------------|-----------------------|----|-------|-------|
| Gene                          |                                                              |                       |    |       |       |
| Ontology - Biological Process | leukocyte homeostasis                                        | experimental (strong) | 5  | 1.084 | 0.022 |
| Gene                          | muscle                                                       |                       |    |       |       |
| Ontology - Biological Process | cell proliferation                                           | experimental (strong) | 9  | 3.201 | 0.022 |
| Gene                          | negative regulation of extrinsic apoptotic signaling pathway |                       |    |       |       |
| Ontology - Biological Process | via death domain receptors                                   | experimental (strong) | 4  | 0.671 | 0.022 |
| Gene                          | negative regulation of leukocyte migration                   |                       |    |       |       |
| Ontology - Biological Process | leukocyte migration                                          | experimental (strong) | 3  | 0.336 | 0.022 |
| Gene                          |                                                              |                       |    |       |       |
| Ontology - Biological Process | peptide secretion                                            | experimental (strong) | 12 | 5.085 | 0.022 |
| Gene                          | positive regulation of histone H3-K9 acetylation             |                       |    |       |       |
| Ontology - Biological Process | H3-K9 acetylation                                            | experimental (strong) | 2  | 0.103 | 0.022 |
| Gene                          | positive regulation of interleukin-12 biosynthetic process   |                       |    |       |       |
| Ontology - Biological Process | interleukin-12 biosynthetic process                          | experimental (strong) | 2  | 0.103 | 0.022 |

|      |                                                                      |                       |   |       |       |
|------|----------------------------------------------------------------------|-----------------------|---|-------|-------|
| Gene | positive regulation of lipopolysaccharide-mediated signaling pathway | experimental (strong) | 2 | 0.103 | 0.022 |
|------|----------------------------------------------------------------------|-----------------------|---|-------|-------|

|      |                                                                     |                       |   |       |       |
|------|---------------------------------------------------------------------|-----------------------|---|-------|-------|
| Gene | positive regulation of reactive oxygen species biosynthetic process | experimental (strong) | 4 | 0.671 | 0.022 |
|------|---------------------------------------------------------------------|-----------------------|---|-------|-------|

|      |                                  |                       |    |       |       |
|------|----------------------------------|-----------------------|----|-------|-------|
| Gene | positive regulation of secretion | experimental (strong) | 10 | 3.794 | 0.022 |
|------|----------------------------------|-----------------------|----|-------|-------|

|      |                                    |                       |   |       |       |
|------|------------------------------------|-----------------------|---|-------|-------|
| Gene | regulation of fibroblast migration | experimental (strong) | 3 | 0.336 | 0.022 |
|------|------------------------------------|-----------------------|---|-------|-------|

|      |                                         |                       |   |       |       |
|------|-----------------------------------------|-----------------------|---|-------|-------|
| Gene | regulation of immunoglobulin production | experimental (strong) | 4 | 0.671 | 0.022 |
|------|-----------------------------------------|-----------------------|---|-------|-------|

|      |                       |                       |   |       |       |
|------|-----------------------|-----------------------|---|-------|-------|
| Gene | response to estradiol | experimental (strong) | 6 | 1.549 | 0.022 |
|------|-----------------------|-----------------------|---|-------|-------|

|      |                              |                       |   |       |       |
|------|------------------------------|-----------------------|---|-------|-------|
| Gene | semi-lunar valve development | experimental (strong) | 4 | 0.671 | 0.022 |
|------|------------------------------|-----------------------|---|-------|-------|

|      |           |                       |    |       |       |
|------|-----------|-----------------------|----|-------|-------|
| Gene | signaling | experimental (strong) | 51 | 39.78 | 0.022 |
|------|-----------|-----------------------|----|-------|-------|

|            |                                  |           |    |       |       |
|------------|----------------------------------|-----------|----|-------|-------|
| Gene       | ventricular<br>cardiac<br>muscle |           |    |       |       |
| Ontology - | tissue                           | experimen |    |       |       |
| Biological | developm                         | tal       |    |       |       |
| Process    | ent                              | (strong)  | 4  | 0.671 | 0.022 |
| Gene       | cell                             |           |    |       |       |
| Ontology - | projection                       |           |    |       |       |
| Biological | morphoge                         | experimen |    |       |       |
| Process    | nesis                            | tal (any) | 14 | 6.697 | 0.022 |
| Gene       |                                  |           |    |       |       |
| Ontology - | cellular                         |           |    |       |       |
| Biological | response                         | experimen |    |       |       |
| Process    | to alkaloid                      | tal (any) | 3  | 0.399 | 0.022 |
| Gene       | cellular                         |           |    |       |       |
| Ontology - | response                         |           |    |       |       |
| Biological | to                               |           |    |       |       |
| Process    | lipoteichoic acid                | experimen | 2  | 0.133 | 0.022 |
| Gene       |                                  |           |    |       |       |
| Ontology - | cellular                         |           |    |       |       |
| Biological | response                         |           |    |       |       |
| Process    | to                               |           |    |       |       |
| Gene       | macrophage colony-               |           |    |       |       |
| Ontology - | stimulatin                       |           |    |       |       |
| Biological | g factor                         | experimen |    |       |       |
| Process    | stimulus                         | tal (any) | 2  | 0.133 | 0.022 |
| Gene       |                                  |           |    |       |       |
| Ontology - | cyclooxyg                        |           |    |       |       |
| Biological | enase                            | experimen |    |       |       |
| Process    | pathway                          | tal (any) | 2  | 0.133 | 0.022 |
| Gene       |                                  |           |    |       |       |
| Ontology - | detection                        |           |    |       |       |
| Biological | of                               |           |    |       |       |
| Process    | mechanic                         |           |    |       |       |
| Gene       | al                               |           |    |       |       |
| Ontology - | stimulus                         |           |    |       |       |
| Biological | involved in                      |           |    |       |       |
| Process    | sensory                          |           |    |       |       |
| Gene       | perception                       | experimen |    |       |       |
| Ontology - | of pain                          | tal (any) | 2  | 0.133 | 0.022 |
| Biological |                                  |           |    |       |       |
| Process    | dorsal/ven                       |           |    |       |       |
| Gene       | tral axis                        |           |    |       |       |
| Ontology - |                                  |           |    |       |       |
| Biological | specificati                      | experimen |    |       |       |
| Process    | on                               | tal (any) | 2  | 0.133 | 0.022 |

|                       |                          |                    |    |       |       |
|-----------------------|--------------------------|--------------------|----|-------|-------|
| Gene                  |                          |                    |    |       |       |
| Ontology - drug       |                          |                    |    |       |       |
| Biological Process    | metabolic process        | experimental (any) | 13 | 6.006 | 0.022 |
| Gene                  | endocardi                |                    |    |       |       |
| Ontology - um         |                          |                    |    |       |       |
| Biological Process    | development              | experimental (any) | 2  | 0.133 | 0.022 |
| Gene                  | forebrain                |                    |    |       |       |
| Ontology - generatio  |                          |                    |    |       |       |
| Biological Process    | n of neurons             | experimental (any) | 4  | 0.771 | 0.022 |
| Gene                  |                          |                    |    |       |       |
| Ontology -            |                          |                    |    |       |       |
| Biological Process    | hormone transport        | experimental (any) | 9  | 3.415 | 0.022 |
| Gene                  | intrinsic                |                    |    |       |       |
| Ontology - apoptotic  |                          |                    |    |       |       |
| Biological Process    | signaling pathway        | experimental (any) | 9  | 3.401 | 0.022 |
| Gene                  | kidney                   |                    |    |       |       |
| Ontology - epithelium |                          |                    |    |       |       |
| Biological Process    | development              | experimental (any) | 6  | 1.687 | 0.022 |
| Gene                  | macrophage derived       |                    |    |       |       |
| Ontology - foam cell  |                          |                    |    |       |       |
| Biological Process    | differentiation          | experimental (any) | 3  | 0.399 | 0.022 |
| Gene                  | mesonephric              |                    |    |       |       |
| Ontology - epithelium |                          |                    |    |       |       |
| Biological Process    | development              | experimental (any) | 5  | 1.209 | 0.022 |
| Gene                  | mesonephric tubule       |                    |    |       |       |
| Ontology -            |                          |                    |    |       |       |
| Biological Process    | development              | experimental (any) | 5  | 1.209 | 0.022 |
| Gene                  | multicellular organismal |                    |    |       |       |
| Ontology - l          |                          |                    |    |       |       |
| Biological Process    | homeostasis              | experimental (any) | 12 | 5.315 | 0.022 |

|            |                     |           |     |       |       |
|------------|---------------------|-----------|-----|-------|-------|
| Gene       | negative regulation |           |     |       |       |
| Ontology - | of immune           |           |     |       |       |
| Biological | system              | experimen |     |       |       |
| Process    | process             | tal (any) | 11  | 4.664 | 0.022 |
|            | olfactory           |           |     |       |       |
|            | bulb                |           |     |       |       |
| Gene       | interneuro          |           |     |       |       |
| Ontology - | n                   |           |     |       |       |
| Biological | differentia         | experimen |     |       |       |
| Process    | tion                | tal (any) | 2   | 0.133 | 0.022 |
| Gene       | pattern             |           |     |       |       |
| Ontology - | specificati         |           |     |       |       |
| Biological | on                  | experimen |     |       |       |
| Process    | process             | tal (any) | 11  | 4.677 | 0.022 |
|            | positive            |           |     |       |       |
|            | regulation          |           |     |       |       |
|            | of                  |           |     |       |       |
| Gene       | adherens            |           |     |       |       |
| Ontology - | junction            |           |     |       |       |
| Biological | organizati          | experimen |     |       |       |
| Process    | on                  | tal (any) | 3   | 0.399 | 0.022 |
|            | positive            |           |     |       |       |
|            | regulation          |           |     |       |       |
| Gene       | of cell             |           |     |       |       |
| Ontology - |                     |           |     |       |       |
| Biological | developm            | experimen |     |       |       |
| Process    | ent                 | tal (any) | 13  | 5.992 | 0.022 |
|            | regulation          |           |     |       |       |
|            | of                  |           |     |       |       |
| Gene       | macrophage          |           |     |       |       |
| Ontology - |                     |           |     |       |       |
| Biological | apoptotic           | experimen |     |       |       |
| Process    | process             | tal (any) | 2   | 0.133 | 0.022 |
| Gene       |                     |           |     |       |       |
| Ontology - |                     |           |     |       |       |
| Biological | response            | experimen |     |       |       |
| Process    | to gravity          | tal (any) | 2   | 0.133 | 0.022 |
| Gene       |                     |           |     |       |       |
| Ontology - | response            |           |     |       |       |
| Biological | to peptide          | experimen |     |       |       |
| Process    | hormone             | tal (any) | 11  | 4.65  | 0.022 |
| Gene       |                     |           |     |       |       |
| Ontology - | regulation          |           |     |       |       |
| Biological | of neuron           |           |     |       |       |
| Process    | differentia         | predicted | 248 | 207.3 | 0.023 |
|            | tion                | (union)   |     |       |       |

|                                        |                                                 |     |       |       |  |
|----------------------------------------|-------------------------------------------------|-----|-------|-------|--|
| Gene                                   |                                                 |     |       |       |  |
| Ontology - tube                        |                                                 |     |       |       |  |
| Biological Process                     | development predicted (union)                   | 404 | 351.8 | 0.023 |  |
| Gene                                   | cardiac                                         |     |       |       |  |
| Ontology - chamber                     | experimental                                    |     |       |       |  |
| Biological Process                     | development (strong)                            | 7   | 2.091 | 0.023 |  |
| Gene                                   | cellular                                        |     |       |       |  |
| Ontology - component                   | experimental                                    |     |       |       |  |
| Biological Process                     | assembly (strong)                               | 27  | 16.83 | 0.023 |  |
| Gene                                   |                                                 |     |       |       |  |
| Ontology - leukocyte                   | experimental                                    |     |       |       |  |
| Biological Process                     | proliferation (strong)                          | 9   | 3.226 | 0.023 |  |
| Gene                                   | regulation of supramolecular fiber organization |     |       |       |  |
| Ontology - cellular fiber organization | experimental (strong)                           | 8   | 2.633 | 0.023 |  |
| Gene                                   | response to DNA damage                          |     |       |       |  |
| Ontology - stimulus                    | experimental (any)                              | 18  | 9.58  | 0.023 |  |
| Gene                                   | covalent chromatin modification                 |     |       |       |  |
| Ontology - chromatin modification      | experimental (any)                              | 12  | 5.381 | 0.023 |  |
| Gene                                   | interleukin-8                                   |     |       |       |  |
| Ontology - interleukin-8               | experimental (any)                              | 4   | 0.784 | 0.023 |  |
| Gene                                   |                                                 |     |       |       |  |
| Ontology - necroptotic process         | experimental (any)                              | 3   | 0.412 | 0.023 |  |
| Gene                                   | negative regulation of ERK1 and ERK2 cascade    |     |       |       |  |
| Ontology - of ERK1 and ERK2 cascade    | experimental (any)                              | 4   | 0.784 | 0.023 |  |



|                                             |                                                                                     |                        |    |       |       |
|---------------------------------------------|-------------------------------------------------------------------------------------|------------------------|----|-------|-------|
| Gene<br>Ontology -<br>Biological<br>Process | negative<br>regulation<br>of<br>epithelial<br>cell<br>migration                     | experimen<br>tal (any) | 4  | 0.784 | 0.023 |
| Gene<br>Ontology -<br>Biological<br>Process | negative<br>regulation<br>of<br>extrinsic<br>apoptotic<br>signaling<br>pathway      | experimen<br>tal (any) | 5  | 1.236 | 0.023 |
| Gene<br>Ontology -<br>Biological<br>Process | negative<br>regulation<br>of<br>transcripti<br>on, DNA-<br>templated                | experimen<br>tal (any) | 22 | 12.65 | 0.023 |
| Gene<br>Ontology -<br>Biological<br>Process | positive<br>regulation<br>of cell<br>junction<br>assembly                           | experimen<br>tal (any) | 3  | 0.412 | 0.023 |
| Gene<br>Ontology -<br>Biological<br>Process | positive<br>regulation<br>of cyclin-<br>dependen<br>t protein<br>kinase<br>activity | experimen<br>tal (any) | 3  | 0.412 | 0.023 |
| Gene<br>Ontology -<br>Biological<br>Process | regulation<br>of DNA<br>replication                                                 | experimen<br>tal (any) | 5  | 1.236 | 0.023 |
| Gene<br>Ontology -<br>Biological<br>Process | regulation<br>of cell<br>cycle                                                      | experimen<br>tal (any) | 23 | 13.38 | 0.023 |
| Gene<br>Ontology -<br>Biological<br>Process | regulation<br>of<br>extracellul<br>ar matrix<br>organizati<br>on                    | experimen<br>tal (any) | 3  | 0.412 | 0.023 |

|            |             |             |     |       |       |
|------------|-------------|-------------|-----|-------|-------|
| Gene       | response    |             |     |       |       |
| Ontology - | to          |             |     |       |       |
| Biological | inorganic   | experimen   |     |       |       |
| Process    | substance   | tal (any)   | 13  | 6.019 | 0.023 |
|            | central     |             |     |       |       |
| Gene       | nervous     |             |     |       |       |
| Ontology - | system      | predicted   |     |       |       |
| Biological | developm    | (intersecti |     |       |       |
| Process    | ent         | on)         | 192 | 150.8 | 0.024 |
| Gene       |             |             |     |       |       |
| Ontology - |             | predicted   |     |       |       |
| Biological | organ       | (intersecti |     |       |       |
| Process    | growth      | on)         | 44  | 25.59 | 0.024 |
| Gene       |             |             |     |       |       |
| Ontology - | response    | predicted   |     |       |       |
| Biological | to          | (intersecti |     |       |       |
| Process    | hormone     | on)         | 186 | 145.5 | 0.024 |
| Gene       |             |             |     |       |       |
| Ontology - | tube        | predicted   |     |       |       |
| Biological | morphoge    | (intersecti |     |       |       |
| Process    | nesis       | on)         | 169 | 130.3 | 0.024 |
| Gene       |             |             |     |       |       |
| Ontology - | brain       |             |     |       |       |
| Biological | developm    | predicted   |     |       |       |
| Process    | ent         | (union)     | 289 | 245.2 | 0.024 |
|            | negative    |             |     |       |       |
|            | regulation  |             |     |       |       |
|            | of          |             |     |       |       |
|            | transcripti |             |     |       |       |
| Gene       | on by       |             |     |       |       |
| Ontology - | RNA         |             |     |       |       |
| Biological | polymeras   | predicted   |     |       |       |
| Process    | e II        | (union)     | 308 | 262.8 | 0.024 |
| Gene       | animal      |             |     |       |       |
| Ontology - | organ       | experimen   |     |       |       |
| Biological | regenerati  | tal         |     |       |       |
| Process    | on          | (strong)    | 5   | 1.11  | 0.024 |
|            | positive    |             |     |       |       |
| Gene       | regulation  |             |     |       |       |
| Ontology - | of innate   | experimen   |     |       |       |
| Biological | immune      | tal         |     |       |       |
| Process    | response    | (strong)    | 9   | 3.252 | 0.024 |
| Gene       | mesoneph    |             |     |       |       |
| Ontology - | ros         |             |     |       |       |
| Biological | developm    | experimen   |     |       |       |
| Process    | ent         | tal (any)   | 5   | 1.249 | 0.024 |

|                    |                                            |                       |     |       |       |
|--------------------|--------------------------------------------|-----------------------|-----|-------|-------|
| Gene               | neural precursor                           |                       |     |       |       |
| Ontology -         | cell                                       |                       |     |       |       |
| Biological Process | proliferation                              | experimental (any)    | 6   | 1.754 | 0.024 |
| Gene               |                                            |                       |     |       |       |
| Ontology -         | neural tube                                |                       |     |       |       |
| Biological Process | formation                                  | experimental (any)    | 5   | 1.249 | 0.024 |
| Gene               |                                            |                       |     |       |       |
| Ontology -         | regulation of protein                      |                       |     |       |       |
| Biological Process | ubiquitination                             | experimental (any)    | 7   | 2.285 | 0.024 |
| Gene               |                                            |                       |     |       |       |
| Ontology -         | tube formation                             |                       |     |       |       |
| Biological Process |                                            | experimental (any)    | 6   | 1.754 | 0.024 |
| Gene               |                                            |                       |     |       |       |
| Ontology -         | central nervous system                     |                       |     |       |       |
| Biological Process | development                                | predicted (union)     | 42  | 26.94 | 0.025 |
| Gene               |                                            |                       |     |       |       |
| Ontology -         | posttranscriptional regulation             |                       |     |       |       |
| Biological Process | expression                                 | predicted (union)     | 231 | 192.1 | 0.025 |
| Gene               |                                            |                       |     |       |       |
| Ontology -         | protein dephosphorylation                  |                       |     |       |       |
| Biological Process |                                            | predicted (union)     | 135 | 105.8 | 0.025 |
| Gene               |                                            |                       |     |       |       |
| Ontology -         | regulation of actin filament-based process |                       |     |       |       |
| Biological Process |                                            | predicted (union)     | 145 | 114.8 | 0.025 |
| Gene               |                                            |                       |     |       |       |
| Ontology -         | regulation of phosphatase activity         |                       |     |       |       |
| Biological Process |                                            | predicted (union)     | 80  | 58.18 | 0.025 |
| Gene               |                                            |                       |     |       |       |
| Ontology -         | central nervous system                     |                       |     |       |       |
| Biological Process | development                                | experimental (strong) | 17  | 8.827 | 0.025 |

|                               |                                                 |                       |    |       |       |
|-------------------------------|-------------------------------------------------|-----------------------|----|-------|-------|
| Gene                          |                                                 |                       |    |       |       |
| Ontology - Biological Process | detection of stimulus                           | experimental (strong) | 5  | 1.136 | 0.025 |
|                               | innate immune response-activating               |                       |    |       |       |
| Gene                          |                                                 |                       |    |       |       |
| Ontology - Biological Process | signal transduction                             | experimental (strong) | 8  | 2.71  | 0.025 |
| Gene                          |                                                 |                       |    |       |       |
| Ontology - Biological Process | neurotransmitter biosynthetic process           | experimental (strong) | 5  | 1.136 | 0.025 |
| Gene                          |                                                 |                       |    |       |       |
| Ontology - Biological Process | regulation of MAP kinase activity               | experimental (strong) | 9  | 3.278 | 0.025 |
| Gene                          |                                                 |                       |    |       |       |
| Ontology - Biological Process | regulation of catalytic activity                | experimental (strong) | 21 | 11.98 | 0.025 |
| Gene                          |                                                 |                       |    |       |       |
| Ontology - Biological Process | positive regulation of chemokine production     | experimental (strong) | 4  | 0.697 | 0.025 |
| Gene                          |                                                 |                       |    |       |       |
| Ontology - Biological Process | positive regulation of peptide secretion        | experimental (strong) | 8  | 2.684 | 0.025 |
| Gene                          |                                                 |                       |    |       |       |
| Ontology - Biological Process | regulation of extracellular matrix organization | experimental (strong) | 3  | 0.361 | 0.025 |

|                                    |                                                        |                       |    |       |       |
|------------------------------------|--------------------------------------------------------|-----------------------|----|-------|-------|
| Gene Ontology - Biological Process | regulation of granulocyte chemotaxis                   | experimental (strong) | 3  | 0.361 | 0.025 |
| Gene Ontology - Biological Process | regulation of peptidyl-serine phosphorylation          | experimental (strong) | 6  | 1.6   | 0.025 |
| Gene Ontology - Biological Process | regulation of protein serine/threonine kinase activity | experimental (strong) | 13 | 5.911 | 0.025 |
| Gene Ontology - Biological Process | regulation of secretion                                | experimental (strong) | 14 | 6.608 | 0.025 |
| Gene Ontology - Biological Process | regulation of transcription, DNA-templated             | experimental (strong) | 36 | 25.04 | 0.025 |
| Gene Ontology - Biological Process | response to ammonium ion                               | experimental (strong) | 5  | 1.136 | 0.025 |
| Gene Ontology - Biological Process | response to angiotensin                                | experimental (strong) | 3  | 0.361 | 0.025 |
| Gene Ontology - Biological Process | response to stimulus                                   | experimental (strong) | 60 | 50.41 | 0.025 |
| Gene Ontology - Biological Process | response to tumor necrosis factor                      | experimental (strong) | 8  | 2.684 | 0.025 |
| Gene Ontology - Biological Process | ERBB2 signaling pathway                                | experimental (any)    | 3  | 0.425 | 0.025 |

|                    |                             |              |   |       |       |
|--------------------|-----------------------------|--------------|---|-------|-------|
| Gene               | Notch signaling involved in |              |   |       |       |
| Ontology -         | heart                       |              |   |       |       |
| Biological Process | developmental (any)         | experimental | 2 | 0.146 | 0.025 |
| Gene               |                             |              |   |       |       |
| Ontology -         | T cell                      |              |   |       |       |
| Biological Process | homeostasis                 | experimental | 3 | 0.425 | 0.025 |
| Gene               |                             |              |   |       |       |
| Ontology -         | cell                        |              |   |       |       |
| Biological Process | cytokine production         | experimental | 2 | 0.146 | 0.025 |
| Gene               |                             |              |   |       |       |
| Ontology -         |                             |              |   |       |       |
| Biological Process | bleb assembly               | experimental | 2 | 0.146 | 0.025 |
| Gene               |                             |              |   |       |       |
| Ontology -         | response to                 |              |   |       |       |
| Biological Process | estradiol stimulus          | experimental | 3 | 0.425 | 0.025 |
| Gene               |                             |              |   |       |       |
| Ontology -         | development in              |              |   |       |       |
| Biological Process | camera-type eye             | experimental | 2 | 0.146 | 0.025 |
| Gene               |                             |              |   |       |       |
| Ontology -         |                             |              |   |       |       |
| Biological Process | fibroblast migration        | experimental | 3 | 0.425 | 0.025 |
| Gene               |                             |              |   |       |       |
| Ontology -         | heart                       |              |   |       |       |
| Biological Process | valve formation             | experimental | 2 | 0.146 | 0.025 |
| Gene               |                             |              |   |       |       |
| Ontology -         | macrophage                  |              |   |       |       |
| Biological Process | apoptotic process           | experimental | 2 | 0.146 | 0.025 |
| Gene               |                             |              |   |       |       |
| Ontology -         | positive regulation         |              |   |       |       |
| Biological Process | of DNA replication          | experimental | 3 | 0.425 | 0.025 |

|                                    |                                                                     |                    |    |       |       |
|------------------------------------|---------------------------------------------------------------------|--------------------|----|-------|-------|
| Gene Ontology - Biological Process | positive regulation of type I interferon-mediated signaling pathway | experimental (any) | 2  | 0.146 | 0.025 |
| Gene Ontology - Biological Process | pro-B cell differentiation                                          | experimental (any) | 2  | 0.146 | 0.025 |
| Gene Ontology - Biological Process | regulation of G1/S transition of mitotic cell cycle                 | experimental (any) | 6  | 1.767 | 0.025 |
| Gene Ontology - Biological Process | regulation of histone H3-K9 acetylation                             | experimental (any) | 2  | 0.146 | 0.025 |
| Gene Ontology - Biological Process | regulation of inflammatory response                                 | experimental (any) | 3  | 0.425 | 0.025 |
| Gene Ontology - Biological Process | regulation of response to wounding                                  | experimental (any) | 6  | 1.767 | 0.025 |
| Gene Ontology - Biological Process | regulation of sprouting angiogenesis                                | experimental (any) | 4  | 0.811 | 0.025 |
| Gene Ontology - Biological Process | response to ionizing radiation                                      | experimental (any) | 6  | 1.78  | 0.025 |
| Gene Ontology - Biological Process | small GTPase mediated signal transduction                           | experimental (any) | 12 | 5.421 | 0.025 |

|            |             |             |    |       |       |
|------------|-------------|-------------|----|-------|-------|
| Gene       |             |             |    |       |       |
| Ontology - | sprouting   |             |    |       |       |
| Biological | angiogene   | experimen   |    |       |       |
| Process    | sis         | tal (any)   | 5  | 1.262 | 0.025 |
|            | response    |             |    |       |       |
|            | to          |             |    |       |       |
| Gene       | transformi  |             |    |       |       |
| Ontology - | ng growth   | predicted   |    |       |       |
| Biological | factor      | (intersecti |    |       |       |
| Process    | beta        | on)         | 58 | 36.68 | 0.026 |
| Gene       |             |             |    |       |       |
| Ontology - | cell        | experimen   |    |       |       |
| Biological | communic    | tal         |    |       |       |
| Process    | ation       | (strong)    | 51 | 40.19 | 0.026 |
| Gene       | lymphocyt   |             |    |       |       |
| Ontology - | e           | experimen   |    |       |       |
| Biological | homeosta    | tal         |    |       |       |
| Process    | sis         | (strong)    | 4  | 0.723 | 0.026 |
|            | positive    |             |    |       |       |
|            | regulation  |             |    |       |       |
|            | of small    |             |    |       |       |
|            | GTPase      |             |    |       |       |
|            | mediated    |             |    |       |       |
| Gene       | signal      | experimen   |    |       |       |
| Ontology - | transducti  | tal         |    |       |       |
| Biological | on          | (strong)    | 4  | 0.723 | 0.026 |
| Process    |             |             |    |       |       |
|            | regulation  |             |    |       |       |
|            | of cell     |             |    |       |       |
|            | migration   |             |    |       |       |
| Gene       | involved in |             |    |       |       |
| Ontology - | sprouting   | experimen   |    |       |       |
| Biological | angiogene   | tal         |    |       |       |
| Process    | sis         | (strong)    | 4  | 0.723 | 0.026 |
| Gene       |             |             |    |       |       |
| Ontology - | response    | experimen   |    |       |       |
| Biological | to steroid  | tal         |    |       |       |
| Process    | hormone     | (strong)    | 11 | 4.594 | 0.026 |
| Gene       |             |             |    |       |       |
| Ontology - | tissue      | experimen   |    |       |       |
| Biological | remodelin   | tal         |    |       |       |
| Process    | g           | (strong)    | 7  | 2.168 | 0.026 |
| Gene       |             |             |    |       |       |
| Ontology - |             | experimen   |    |       |       |
| Biological | vasoconst   | tal         |    |       |       |
| Process    | riktion     | (strong)    | 4  | 0.723 | 0.026 |



|                      |                        |         |                    |     |       |       |
|----------------------|------------------------|---------|--------------------|-----|-------|-------|
| Gene                 |                        |         |                    |     |       |       |
| Ontology - adaptive  |                        |         |                    |     |       |       |
| Biological Process   | immune response        | cardiac | experimental (any) | 10  | 4.159 | 0.026 |
| Gene                 | muscle                 |         |                    |     |       |       |
| Ontology - tissue    |                        |         |                    |     |       |       |
| Biological Process   | development            |         | experimental (any) | 7   | 2.352 | 0.026 |
| Gene                 |                        |         |                    |     |       |       |
| Ontology - cell part |                        |         |                    |     |       |       |
| Biological Process   | morphogenesis          |         | experimental (any) | 14  | 6.883 | 0.026 |
| Gene                 |                        |         |                    |     |       |       |
| Ontology -           |                        |         |                    |     |       |       |
| Biological Process   | cellular process       |         | experimental (any) | 170 | 156.4 | 0.026 |
|                      | negative regulation of |         |                    |     |       |       |
|                      | transcription by       |         |                    |     |       |       |
| Gene                 | RNA                    |         |                    |     |       |       |
| Ontology -           |                        |         |                    |     |       |       |
| Biological Process   | polymerase II          |         | experimental (any) | 17  | 9.048 | 0.026 |
| Gene                 | prostaglandin          |         |                    |     |       |       |
| Ontology -           |                        |         |                    |     |       |       |
| Biological Process   | metabolic process      |         | experimental (any) | 3   | 0.438 | 0.026 |
| Gene                 |                        |         |                    |     |       |       |
| Ontology - protein   |                        |         |                    |     |       |       |
| Biological Process   | monoubiquitination     |         | experimental (any) | 4   | 0.824 | 0.026 |
| Gene                 | regulation             |         |                    |     |       |       |
| Ontology - of cell   |                        |         |                    |     |       |       |
| Biological Process   | cycle arrest           |         | experimental (any) | 5   | 1.289 | 0.026 |
| Gene                 |                        |         |                    |     |       |       |
| Ontology - tissue    |                        |         |                    |     |       |       |
| Biological Process   | homeostasis            |         | experimental (any) | 7   | 2.352 | 0.026 |
| Gene                 |                        |         |                    |     |       |       |
| Ontology -           |                        |         |                    |     |       |       |
| Biological Process   | vasoconstriction       |         | experimental (any) | 4   | 0.824 | 0.026 |

|            |              |           |    |       |       |
|------------|--------------|-----------|----|-------|-------|
| Gene       | endotheliu   |           |    |       |       |
| Ontology - | m            | experimen |    |       |       |
| Biological | developm     | tal       |    |       |       |
| Process    | ent          | (strong)  | 6  | 1.652 | 0.027 |
|            | positive     |           |    |       |       |
| Gene       | regulation   |           |    |       |       |
| Ontology - | of cell      | experimen |    |       |       |
| Biological | developm     | tal       |    |       |       |
| Process    | ent          | (strong)  | 12 | 5.291 | 0.027 |
|            | posttransc   |           |    |       |       |
|            | riptional    |           |    |       |       |
| Gene       | regulation   |           |    |       |       |
| Ontology - | of gene      | experimen |    |       |       |
| Biological | expressio    | tal       |    |       |       |
| Process    | n            | (strong)  | 10 | 3.975 | 0.027 |
|            |              |           |    |       |       |
| Gene       | regulation   |           |    |       |       |
| Ontology - | of innate    | experimen |    |       |       |
| Biological | immune       | tal       |    |       |       |
| Process    | response     | (strong)  | 10 | 3.975 | 0.027 |
| Gene       |              |           |    |       |       |
| Ontology - | developm     |           |    |       |       |
| Biological | ental        | experimen |    |       |       |
| Process    | growth       | tal (any) | 14 | 6.909 | 0.027 |
|            |              |           |    |       |       |
| Gene       | phosphati    |           |    |       |       |
| Ontology - | dylinositol- |           |    |       |       |
| Biological | mediated     | experimen |    |       |       |
| Process    | signaling    | tal (any) | 6  | 1.807 | 0.027 |
|            |              |           |    |       |       |
| Gene       | positive     |           |    |       |       |
| Ontology - | regulation   |           |    |       |       |
| Biological | of B cell    | experimen |    |       |       |
| Process    | activation   | tal (any) | 4  | 0.837 | 0.027 |
| Gene       |              |           |    |       |       |
| Ontology - | protein      |           |    |       |       |
| Biological | autoubiqui   | experimen |    |       |       |
| Process    | tination     | tal (any) | 4  | 0.837 | 0.027 |
|            |              |           |    |       |       |
|            | regulation   |           |    |       |       |
| Gene       | of           |           |    |       |       |
| Ontology - | chemokin     |           |    |       |       |
| Biological | e            | experimen |    |       |       |
| Process    | production   | tal (any) | 4  | 0.837 | 0.027 |
| Gene       |              |           |    |       |       |
| Ontology - | regulation   | experimen |    |       |       |
| Biological | of protein   | tal       |    |       |       |
| Process    | transport    | (strong)  | 13 | 6.014 | 0.028 |

|      |                                                       |                       |    |       |       |
|------|-------------------------------------------------------|-----------------------|----|-------|-------|
| Gene | Ontology - response to radiation                      | experimental (strong) | 10 | 4.001 | 0.028 |
| Gene | Ontology - bone mineralization                        | experimental (any)    | 5  | 1.315 | 0.028 |
| Gene | Ontology - cardiac ventricle morphogenesis            | experimental (any)    | 4  | 0.850 | 0.028 |
| Gene | Ontology - cell development                           | experimental (any)    | 33 | 21.84 | 0.028 |
| Gene | Ontology - endocardial cushion morphogenesis          | experimental (any)    | 3  | 0.452 | 0.028 |
| Gene | Ontology - hydrogen peroxide metabolic process        | experimental (any)    | 3  | 0.452 | 0.028 |
| Gene | Ontology - negative regulation of cell cycle          | experimental (any)    | 14 | 6.962 | 0.028 |
| Gene | Ontology - negative regulation of leukocyte migration | experimental (any)    | 3  | 0.452 | 0.028 |
| Gene | Ontology - regulation of B cell activation            | experimental (any)    | 5  | 1.315 | 0.028 |
| Gene | Ontology - regulation of bone mineralization          | experimental (any)    | 4  | 0.850 | 0.028 |
| Gene | Ontology - reproductive structure development         | experimental (any)    | 11 | 4.89  | 0.028 |

|            |             |               |     |       |       |
|------------|-------------|---------------|-----|-------|-------|
| Gene       | response    |               |     |       |       |
| Ontology - | to          |               |     |       |       |
| Biological | xenobiotic  | experimen     |     |       |       |
| Process    | stimulus    | tal (any)     | 8   | 2.963 | 0.028 |
|            | cellular    |               |     |       |       |
| Gene       | response    |               |     |       |       |
| Ontology - | to growth   | predicted     |     |       |       |
| Biological | factor      | (intersecti   |     |       |       |
| Process    | stimulus    | on)           | 136 | 102.2 | 0.029 |
|            |             |               |     |       |       |
| Gene       | regulation  |               |     |       |       |
| Ontology - | of cellular |               |     |       |       |
| Biological | protein     | predicted     |     |       |       |
| Process    | localizatio | n (intersecti | 116 | 84.99 | 0.029 |
|            | n           | on)           |     |       |       |
| Gene       | tricuspid   |               |     |       |       |
| Ontology - | valve       | predicted     |     |       |       |
| Biological | morphoge    | n (intersecti |     |       |       |
| Process    | nesis       | on)           | 5   | 0.895 | 0.029 |
|            | cardiac     |               |     |       |       |
| Gene       | muscle      |               |     |       |       |
| Ontology - | cell        |               |     |       |       |
| Biological | differentia | predicted     |     |       |       |
| Process    | tion        | (union)       | 53  | 35.92 | 0.029 |
|            |             |               |     |       |       |
| Gene       | cell        |               |     |       |       |
| Ontology - | projection  |               |     |       |       |
| Biological | organizati  | predicted     |     |       |       |
| Process    | on          | (union)       | 546 | 487.3 | 0.029 |
| Gene       |             |               |     |       |       |
| Ontology - | forebrain   |               |     |       |       |
| Biological | developm    | predicted     |     |       |       |
| Process    | ent         | (union)       | 163 | 131.2 | 0.029 |
| Gene       |             |               |     |       |       |
| Ontology - | head        |               |     |       |       |
| Biological | developm    | predicted     |     |       |       |
| Process    | ent         | (union)       | 304 | 260   | 0.029 |
| Gene       |             |               |     |       |       |
| Ontology - | T cell      | experimen     |     |       |       |
| Biological | extravasat  | tal           |     |       |       |
| Process    | ion         | (strong)      | 2   | 0.129 | 0.029 |
| Gene       |             |               |     |       |       |
| Ontology - | adaptive    | experimen     |     |       |       |
| Biological | immune      | tal           |     |       |       |
| Process    | response    | (strong)      | 8   | 2.813 | 0.029 |

|            |             |           |    |       |       |
|------------|-------------|-----------|----|-------|-------|
| Gene       | atrioventri |           |    |       |       |
| Ontology - | cular       | experimen |    |       |       |
| Biological | valve       | tal       |    |       |       |
| Process    | formation   | (strong)  | 2  | 0.129 | 0.029 |
| Gene       |             |           |    |       |       |
| Ontology - |             | experimen |    |       |       |
| Biological | bone        | tal       |    |       |       |
| Process    | resorption  | (strong)  | 4  | 0.749 | 0.029 |
|            | cardiac     |           |    |       |       |
| Gene       | left        |           |    |       |       |
| Ontology - | ventricle   | experimen |    |       |       |
| Biological | morphoge    | tal       |    |       |       |
| Process    | nesis       | (strong)  | 2  | 0.129 | 0.029 |
| Gene       |             |           |    |       |       |
| Ontology - | cellular    | experimen |    |       |       |
| Biological | response    | tal       |    |       |       |
| Process    | to alkaloid | (strong)  | 3  | 0.387 | 0.029 |
|            | cellular    |           |    |       |       |
|            | response    |           |    |       |       |
| Gene       | to          |           |    |       |       |
| Ontology - | dexameth    | experimen |    |       |       |
| Biological | asone       | tal       |    |       |       |
| Process    | stimulus    | (strong)  | 3  | 0.387 | 0.029 |
|            | cellular    |           |    |       |       |
| Gene       | response    |           |    |       |       |
| Ontology - | to          | experimen |    |       |       |
| Biological | hormone     | tal       |    |       |       |
| Process    | stimulus    | (strong)  | 14 | 6.814 | 0.029 |
|            | cellular    |           |    |       |       |
|            | response    |           |    |       |       |
|            | to          |           |    |       |       |
|            | macroph     |           |    |       |       |
| Gene       | ge colony-  |           |    |       |       |
| Ontology - | stimulatin  | experimen |    |       |       |
| Biological | g factor    | tal       |    |       |       |
| Process    | stimulus    | (strong)  | 2  | 0.129 | 0.029 |
|            | common-     |           |    |       |       |
|            | partner     |           |    |       |       |
| Gene       | SMAD        |           |    |       |       |
| Ontology - | protein     | experimen |    |       |       |
| Biological | phosphory   | tal       |    |       |       |
| Process    | lation      | (strong)  | 2  | 0.129 | 0.029 |

|                               |                                              |                       |   |       |       |
|-------------------------------|----------------------------------------------|-----------------------|---|-------|-------|
| Gene                          | cytoplasmic pattern recognition              |                       |   |       |       |
| Ontology - Biological Process | n receptor signaling pathway                 | experimental (strong) | 4 | 0.749 | 0.029 |
| Gene                          | detection of mechanical stimulus involved in |                       |   |       |       |
| Ontology - Biological Process | sensory perception of pain                   | experimental (strong) | 2 | 0.129 | 0.029 |
| Gene                          | molecule of                                  |                       |   |       |       |
| Ontology - Biological Process | bacterial origin                             | experimental (strong) | 2 | 0.129 | 0.029 |
| Gene                          | endocardial cell                             |                       |   |       |       |
| Ontology - Biological Process | differentiation                              | experimental (strong) | 2 | 0.129 | 0.029 |
| Gene                          | lymph node                                   |                       |   |       |       |
| Ontology - Biological Process | development                                  | experimental (strong) | 2 | 0.129 | 0.029 |
| Gene                          | marginal zone B cell                         |                       |   |       |       |
| Ontology - Biological Process | differentiation                              | experimental (strong) | 2 | 0.129 | 0.029 |
| Gene                          | membrane to                                  |                       |   |       |       |
| Ontology - Biological Process | membrane docking                             | experimental (strong) | 2 | 0.129 | 0.029 |
| Gene                          | necroptotic                                  |                       |   |       |       |
| Ontology - Biological Process | signaling pathway                            | experimental (strong) | 2 | 0.129 | 0.029 |

|            |              |           |    |       |       |
|------------|--------------|-----------|----|-------|-------|
| Gene       | negative     |           |    |       |       |
| Ontology - | regulation   | experimen |    |       |       |
| Biological | of cell      | tal       |    |       |       |
| Process    | cycle        | (strong)  | 12 | 5.42  | 0.029 |
| Gene       | negative     |           |    |       |       |
| Ontology - | regulation   | experimen |    |       |       |
| Biological | of cell      | tal       |    |       |       |
| Process    | migration    | (strong)  | 8  | 2.813 | 0.029 |
| Gene       | negative     |           |    |       |       |
| Ontology - | regulation   | experimen |    |       |       |
| Biological | of cell      | tal       |    |       |       |
| Process    | proliferatio | (strong)  | 15 | 7.537 | 0.029 |
| Gene       | pericardiu   |           |    |       |       |
| Ontology - | m            | experimen |    |       |       |
| Biological | morphoge     | tal       |    |       |       |
| Process    | nesis        | (strong)  | 2  | 0.129 | 0.029 |
| Gene       | positive     |           |    |       |       |
| Ontology - | regulation   | experimen |    |       |       |
| Biological | of           | tal       |    |       |       |
| Process    | neurogen     | (strong)  | 11 | 4.672 | 0.029 |
| Gene       | positive     |           |    |       |       |
| Ontology - | regulation   | experimen |    |       |       |
| Biological | of peptidyl- | tal       |    |       |       |
| Process    | tyrosine     | (strong)  | 7  | 2.22  | 0.029 |
| Gene       | phosphory    |           |    |       |       |
| Ontology - | lation       | experimen |    |       |       |
| Biological | protein      | tal       |    |       |       |
| Process    | modificati   | (strong)  | 7  | 2.22  | 0.029 |
| Gene       | on by        |           |    |       |       |
| Ontology - | small        | experimen |    |       |       |
| Biological | protein      | tal       |    |       |       |
| Process    | removal      | (strong)  | 7  | 2.22  | 0.029 |
| Gene       | regulation   |           |    |       |       |
| Ontology - | of           | experimen |    |       |       |
| Biological | angiogene    | tal       |    |       |       |
| Process    | sis          | (strong)  | 10 | 4.078 | 0.029 |
| Gene       | regulation   |           |    |       |       |
| Ontology - | of cell      | experimen |    |       |       |
| Biological | cycle        | tal       |    |       |       |
| Process    | arrest       | (strong)  | 5  | 1.187 | 0.029 |

|      |                                                    |                       |    |       |       |
|------|----------------------------------------------------|-----------------------|----|-------|-------|
| Gene | regulation of epithelial to mesenchymal transition | experimental (strong) | 5  | 1.187 | 0.029 |
| Gene | regulation of extracellular matrix assembly        | experimental (strong) | 2  | 0.129 | 0.029 |
| Gene | regulation of histone H3-K9 acetylation            | experimental (strong) | 2  | 0.129 | 0.029 |
| Gene | regulation of kinase activity                      | experimental (strong) | 17 | 9.06  | 0.029 |
| Gene | toll-like receptor 2 signaling pathway             | experimental (strong) | 2  | 0.129 | 0.029 |
| Gene | JNK cascade                                        | experimental (any)    | 7  | 2.405 | 0.029 |
| Gene | actomyosin structure organization                  | experimental (any)    | 6  | 1.86  | 0.029 |
| Gene | astrocyte development                              | experimental (any)    | 3  | 0.465 | 0.029 |
| Gene | cardiac left ventricle morphogenesis               | experimental (any)    | 2  | 0.159 | 0.029 |



|                               |                                               |                    |    |       |       |
|-------------------------------|-----------------------------------------------|--------------------|----|-------|-------|
| Gene                          | detection of temperature stimulus involved in |                    |    |       |       |
| Ontology - Biological Process | sensory perception of pain                    | experimental (any) | 2  | 0.159 | 0.029 |
| Gene                          | formation of primary germ layer               |                    |    |       |       |
| Ontology - Biological Process | germ layer                                    | experimental (any) | 5  | 1.342 | 0.029 |
| Gene                          | inositol mediated signaling                   |                    |    |       |       |
| Ontology - Biological Process | lipid-mediated signaling                      | experimental (any) | 6  | 1.847 | 0.029 |
| Gene                          | male sex differentiation                      |                    |    |       |       |
| Ontology - Biological Process | male sex differentiation                      | experimental (any) | 6  | 1.847 | 0.029 |
| Gene                          | microglial cell activation                    |                    |    |       |       |
| Ontology - Biological Process | microglial cell activation                    | experimental (any) | 3  | 0.465 | 0.029 |
| Gene                          | negative regulation of bone remodeling        |                    |    |       |       |
| Ontology - Biological Process | negative regulation of bone remodeling        | experimental (any) | 2  | 0.159 | 0.029 |
| Gene                          | negative regulation of cell differentiation   |                    |    |       |       |
| Ontology - Biological Process | negative regulation of cell differentiation   | experimental (any) | 15 | 7.706 | 0.029 |
| Gene                          | negative regulation of gene expression        |                    |    |       |       |
| Ontology - Biological Process | negative regulation of gene expression        | experimental (any) | 31 | 20.22 | 0.029 |

|                                    |                                                                                 |                    |    |       |       |
|------------------------------------|---------------------------------------------------------------------------------|--------------------|----|-------|-------|
| Gene Ontology - Biological Process | negative regulation of intracellular steroid hormone receptor signaling pathway | experimental (any) | 3  | 0.465 | 0.029 |
| Gene Ontology - Biological Process | negative regulation of leukocyte chemotaxis                                     | experimental (any) | 2  | 0.159 | 0.029 |
| Gene Ontology - Biological Process | neurogenesis                                                                    | experimental (any) | 27 | 17.01 | 0.029 |
| Gene Ontology - Biological Process | nucleotide-binding oligomerization domain containing 2 signaling pathway        | experimental (any) | 2  | 0.159 | 0.029 |
| Gene Ontology - Biological Process | positive regulation of SMAD protein signal transduction                         | experimental (any) | 2  | 0.159 | 0.029 |
| Gene Ontology - Biological Process | positive regulation of fibroblast migration                                     | experimental (any) | 2  | 0.159 | 0.029 |
| Gene Ontology - Biological Process | positive regulation of hormone secretion                                        | experimental (any) | 5  | 1.342 | 0.029 |

|      |                                                         |                    |   |       |       |
|------|---------------------------------------------------------|--------------------|---|-------|-------|
| Gene | positive regulation of interleukin-17 production        | experimental (any) | 2 | 0.159 | 0.029 |
| Gene | positive regulation of receptor signaling               | experimental (any) | 4 | 0.864 | 0.029 |
| Gene | positive regulation of tumor necrosis factor production | experimental (any) | 4 | 0.864 | 0.029 |
| Gene | regulation of bone resorption                           | experimental (any) | 3 | 0.465 | 0.029 |
| Gene | regulation of cell-substrate adhesion                   | experimental (any) | 7 | 2.405 | 0.029 |
| Gene | regulation of granulocyte chemotaxis                    | experimental (any) | 3 | 0.465 | 0.029 |
| Gene | regulation of heart morphogenesis                       | experimental (any) | 3 | 0.465 | 0.029 |
| Gene | regulation of neurotransmitter levels                   | experimental (any) | 9 | 3.627 | 0.029 |

|                                    |                                                       |                          |     |       |       |
|------------------------------------|-------------------------------------------------------|--------------------------|-----|-------|-------|
| Gene Ontology - Biological Process | regulation of phosphatidylinositol 3-kinase signaling | experimental (any)       | 5   | 1.329 | 0.029 |
| Gene Ontology - Biological Process | reproductive system development                       | experimental (any)       | 11  | 4.929 | 0.029 |
| Gene Ontology - Biological Process | response to estrogen                                  | experimental (any)       | 4   | 0.864 | 0.029 |
| Gene Ontology - Biological Process | response to progesterone                              | experimental (any)       | 3   | 0.465 | 0.029 |
| Gene Ontology - Biological Process | sex differentiation                                   | experimental (any)       | 8   | 3.003 | 0.029 |
| Gene Ontology - Biological Process | response to growth factor                             | predicted (intersection) | 141 | 106.8 | 0.030 |
| Gene Ontology - Biological Process | activation of immune response                         | experimental (strong)    | 11  | 4.749 | 0.030 |
| Gene Ontology - Biological Process | activation of innate immune response                  | experimental (strong)    | 8   | 2.839 | 0.030 |
| Gene Ontology - Biological Process | cardiac muscle tissue morphogenesis                   | experimental (strong)    | 4   | 0.774 | 0.030 |
| Gene Ontology - Biological Process | negative regulation of blood vessel diameter          | experimental (strong)    | 4   | 0.774 | 0.030 |

|            |             |             |     |       |       |
|------------|-------------|-------------|-----|-------|-------|
| Gene       | regulation  |             |     |       |       |
| Ontology - | of MAP      | experimen   |     |       |       |
| Biological | kinase      | tal         |     |       |       |
| Process    | activity    | (strong)    | 10  | 4.104 | 0.030 |
| Gene       | regulation  |             |     |       |       |
| Ontology - | of          | experimen   |     |       |       |
| Biological | neurogen    | tal         |     |       |       |
| Process    | esis        | (strong)    | 15  | 7.588 | 0.030 |
|            | regulation  |             |     |       |       |
|            | of nucleic  |             |     |       |       |
| Gene       | acid-       |             |     |       |       |
| Ontology - | templated   | experimen   |     |       |       |
| Biological | transcripti | tal         |     |       |       |
| Process    | on          | (strong)    | 36  | 25.53 | 0.030 |
|            | Rho         |             |     |       |       |
| Gene       | protein     |             |     |       |       |
| Ontology - | signal      |             |     |       |       |
| Biological | transducti  | experimen   |     |       |       |
| Process    | on          | tal (any)   | 6   | 1.873 | 0.030 |
|            | positive    |             |     |       |       |
|            | regulation  |             |     |       |       |
| Gene       | of mitotic  |             |     |       |       |
| Ontology - | cell cycle  |             |     |       |       |
| Biological | phase       | experimen   |     |       |       |
| Process    | transition  | tal (any)   | 4   | 0.877 | 0.030 |
|            | positive    |             |     |       |       |
|            | regulation  |             |     |       |       |
| Gene       | of protein  |             |     |       |       |
| Ontology - |             |             |     |       |       |
| Biological | polymeriz   | experimen   |     |       |       |
| Process    | ation       | tal (any)   | 5   | 1.355 | 0.030 |
| Gene       |             |             |     |       |       |
| Ontology - |             |             |     |       |       |
| Biological | response    | experimen   |     |       |       |
| Process    | to peptide  | tal (any)   | 12  | 5.634 | 0.030 |
|            | cell        |             |     |       |       |
| Gene       | surface     |             |     |       |       |
| Ontology - | receptor    | predicted   |     |       |       |
| Biological | signaling   | (intersecti |     |       |       |
| Process    | pathway     | on)         | 504 | 440.5 | 0.031 |
| Gene       |             |             |     |       |       |
| Ontology - | Golgi       |             |     |       |       |
| Biological | vesicle     | predicted   |     |       |       |
| Process    | transport   | (union)     | 136 | 107.4 | 0.031 |

|            |                                           |                    |    |       |       |
|------------|-------------------------------------------|--------------------|----|-------|-------|
| Gene       | actin                                     |                    |    |       |       |
| Ontology - | cytoskeleton                              |                    |    |       |       |
| Biological | organization                              | experimental (any) | 13 | 6.391 | 0.031 |
| Process    | extracellular                             |                    |    |       |       |
| Gene       | artery                                    |                    |    |       |       |
| Ontology - | structure                                 |                    |    |       |       |
| Biological | organization                              | experimental (any) | 10 | 4.318 | 0.031 |
| Process    | muscle                                    |                    |    |       |       |
| Gene       | muscle                                    |                    |    |       |       |
| Ontology - | organ                                     |                    |    |       |       |
| Biological | development                               | experimental (any) | 10 | 4.318 | 0.031 |
| Process    | ent                                       |                    |    |       |       |
| Gene       | negative regulation                       |                    |    |       |       |
| Ontology - | of blood vessel                           |                    |    |       |       |
| Biological | vessel diameter                           | experimental (any) | 4  | 0.890 | 0.031 |
| Process    |                                           |                    |    |       |       |
| Gene       | positive regulation                       |                    |    |       |       |
| Ontology - | of bone mineralization                    |                    |    |       |       |
| Biological | mineralization                            | experimental (any) | 3  | 0.478 | 0.031 |
| Process    |                                           |                    |    |       |       |
| Gene       | positive regulation of receptor signaling |                    |    |       |       |
| Ontology - |                                           |                    |    |       |       |
| Biological | pathway via STAT                          | experimental (any) | 4  | 0.890 | 0.031 |
| Process    |                                           |                    |    |       |       |
| Gene       | programmed necrotic cell death            |                    |    |       |       |
| Ontology - |                                           |                    |    |       |       |
| Biological | necrotic cell death                       | experimental (any) | 3  | 0.478 | 0.031 |
| Process    |                                           |                    |    |       |       |
| Gene       | response to dsRNA                         |                    |    |       |       |
| Ontology - |                                           |                    |    |       |       |
| Biological | response to dsRNA                         | experimental (any) | 3  | 0.478 | 0.031 |
| Process    |                                           |                    |    |       |       |
| Gene       | response to testosterone                  |                    |    |       |       |
| Ontology - |                                           |                    |    |       |       |
| Biological | testosterone                              | experimental (any) | 3  | 0.478 | 0.031 |
| Process    |                                           |                    |    |       |       |

|            |                     |           |    |       |       |
|------------|---------------------|-----------|----|-------|-------|
| Gene       | somatic stem cell   |           |    |       |       |
| Ontology - | population          |           |    |       |       |
| Biological | maintenan           | experimen |    |       |       |
| Process    | ce                  | tal (any) | 4  | 0.890 | 0.031 |
| Gene       | MyD88-<br>independe |           |    |       |       |
| Ontology - | receptor            | experimen |    |       |       |
| Biological | signaling           | tal       |    |       |       |
| Process    | pathway             | (strong)  | 3  | 0.413 | 0.032 |
| Gene       | cardiac             |           |    |       |       |
| Ontology - | septum              | experimen |    |       |       |
| Biological | morphoge            | tal       |    |       |       |
| Process    | nesis               | (strong)  | 5  | 1.239 | 0.032 |
| Gene       | cellular            |           |    |       |       |
| Ontology - | protein-            | experimen |    |       |       |
| Biological | containing          | tal       |    |       |       |
| Process    | complex             | (strong)  | 11 | 4.801 | 0.032 |
| Gene       | assembly            |           |    |       |       |
| Ontology - |                     | experimen |    |       |       |
| Biological | fibroblast          | tal       |    |       |       |
| Process    | migration           | (strong)  | 3  | 0.413 | 0.032 |
| Gene       | hydrogen            |           |    |       |       |
| Ontology - | peroxide            | experimen |    |       |       |
| Biological | metabolic           | tal       |    |       |       |
| Process    | process             | (strong)  | 3  | 0.413 | 0.032 |
| Gene       | negative            |           |    |       |       |
| Ontology - | regulation          | experimen |    |       |       |
| Biological | of cell             | tal       |    |       |       |
| Process    | motility            | (strong)  | 8  | 2.891 | 0.032 |
| Gene       | negative            |           |    |       |       |
| Ontology - | regulation          | experimen |    |       |       |
| Biological | of ion              | tal       |    |       |       |
| Process    | transport           | (strong)  | 5  | 1.239 | 0.032 |
| Gene       | regulation          |           |    |       |       |
| Ontology - | of gene             | experimen |    |       |       |
| Biological | expressio           | tal       |    |       |       |
| Process    | n                   | (strong)  | 41 | 30.43 | 0.032 |
| Gene       | response            |           |    |       |       |
| Ontology - | to                  | experimen |    |       |       |
| Biological | gonadotro           | tal       |    |       |       |
| Process    | pin                 | (strong)  | 3  | 0.413 | 0.032 |

|            |              |           |   |       |       |
|------------|--------------|-----------|---|-------|-------|
| Gene       |              |           |   |       |       |
| Ontology - | response     | experimen |   |       |       |
| Biological | to           | tal       |   |       |       |
| Process    | morphine     | (strong)  | 3 | 0.413 | 0.032 |
| Gene       | actin        |           |   |       |       |
| Ontology - | filament     |           |   |       |       |
| Biological | organizati   | experimen |   |       |       |
| Process    | on           | tal (any) | 9 | 3.72  | 0.032 |
| Gene       | endoderm     |           |   |       |       |
| Ontology - | al cell fate |           |   |       |       |
| Biological | commitme     | experimen |   |       |       |
| Process    | nt           | tal (any) | 2 | 0.173 | 0.032 |
| Gene       | histone      |           |   |       |       |
| Ontology - | H3-K9        |           |   |       |       |
| Biological | acetylatio   | experimen |   |       |       |
| Process    | n            | tal (any) | 2 | 0.173 | 0.032 |
| Gene       | hyalurona    |           |   |       |       |
| Ontology - | n            |           |   |       |       |
| Biological | biosynthet   | experimen |   |       |       |
| Process    | ic process   | tal (any) | 2 | 0.173 | 0.032 |
| Gene       | positive     |           |   |       |       |
| Ontology - | regulation   |           |   |       |       |
| Biological | of cellular  | experimen |   |       |       |
| Process    | extravasat   | tal (any) | 2 | 0.173 | 0.032 |
| Gene       | positive     |           |   |       |       |
| Ontology - | regulation   |           |   |       |       |
| Biological | of           | experimen |   |       |       |
| Process    | macroph      | tal (any) | 2 | 0.173 | 0.032 |
| Gene       | ge           |           |   |       |       |
| Ontology - | differentia  | experimen |   |       |       |
| Biological | tion         | tal (any) | 2 | 0.173 | 0.032 |
| Process    | regulation   |           |   |       |       |
| Gene       | of           |           |   |       |       |
| Ontology - | extracellul  |           |   |       |       |
| Biological | ar matrix    | experimen |   |       |       |
| Process    | disassem     | tal (any) | 2 | 0.173 | 0.032 |
| Gene       | bly          |           |   |       |       |



|      |                                                               |                          |    |       |       |
|------|---------------------------------------------------------------|--------------------------|----|-------|-------|
| Gene | cellular response to transforming growth factor beta stimulus | predicted (intersection) | 56 | 35.61 | 0.033 |
| Gene | positive regulation of cell cycle process                     | experimental (strong)    | 8  | 2.917 | 0.033 |
| Gene | positive regulation of fibroblast proliferation               | experimental (strong)    | 4  | 0.800 | 0.033 |
| Gene | positive regulation of interleukin-6 production               | experimental (strong)    | 4  | 0.800 | 0.033 |
| Gene | regulation of cell activation                                 | experimental (strong)    | 12 | 5.549 | 0.033 |
| Gene | regulation of histone acetylation                             | experimental (strong)    | 4  | 0.800 | 0.033 |
| Gene | translation                                                   | experimental (strong)    | 8  | 2.917 | 0.033 |
| Gene | T cell cytokine production                                    | experimental (any)       | 3  | 0.492 | 0.033 |
| Gene | icosanoid biosynthetic process                                | experimental (any)       | 3  | 0.492 | 0.033 |

|            |             |             |     |       |       |
|------------|-------------|-------------|-----|-------|-------|
| Gene       | negative    |             |     |       |       |
| Ontology - | regulation  |             |     |       |       |
| Biological | of cell     | experimen   |     |       |       |
| Process    | growth      | tal (any)   | 6   | 1.927 | 0.033 |
| Gene       | neuron      |             |     |       |       |
| Ontology - | projection  |             |     |       |       |
| Biological | morphoge    | experimen   |     |       |       |
| Process    | nesis       | tal (any)   | 13  | 6.457 | 0.033 |
| Gene       | regulation  |             |     |       |       |
| Ontology - | of animal   |             |     |       |       |
| Biological | morphoge    | experimen   |     |       |       |
| Process    | nesis       | tal (any)   | 8   | 3.109 | 0.033 |
| Gene       | regulation  |             |     |       |       |
| Ontology - | of cell-    |             |     |       |       |
| Biological | matrix      | experimen   |     |       |       |
| Process    | adhesion    | tal (any)   | 5   | 1.395 | 0.033 |
| Gene       | regulation  |             |     |       |       |
| Ontology - | of          |             |     |       |       |
| Gene       | oligodendr  |             |     |       |       |
| Ontology - | ocyte       |             |     |       |       |
| Biological | differentia | experimen   |     |       |       |
| Process    | tion        | tal (any)   | 3   | 0.492 | 0.033 |
| Gene       | response    |             |     |       |       |
| Ontology - | to          |             |     |       |       |
| Biological | ammoniu     | experimen   |     |       |       |
| Process    | m ion       | tal (any)   | 5   | 1.395 | 0.033 |
| Gene       | response    |             |     |       |       |
| Ontology - | to          |             |     |       |       |
| Biological | dexameth    | experimen   |     |       |       |
| Process    | asone       | tal (any)   | 3   | 0.492 | 0.033 |
| Gene       |             |             |     |       |       |
| Ontology - | cell-cell   | predicted   |     |       |       |
| Biological | signaling   | (intersecti |     |       |       |
| Process    | by wnt      | on)         | 109 | 79.62 | 0.034 |
| Gene       | phosphate-  |             |     |       |       |
| Ontology - | containing  |             |     |       |       |
| Biological | compound    | predicted   |     |       |       |
| Process    | metabolic   | (intersecti | 553 | 487.8 | 0.034 |
| Process    | process     | on)         |     |       |       |

|                               |                                         |                       |    |       |       |
|-------------------------------|-----------------------------------------|-----------------------|----|-------|-------|
| Gene                          |                                         |                       |    |       |       |
| Ontology - Biological Process | cellular response to drug               | experimental (strong) | 10 | 4.207 | 0.034 |
| Gene                          |                                         |                       |    |       |       |
| Ontology - Biological Process | entry into host cell                    | experimental (strong) | 5  | 1.265 | 0.034 |
| Gene                          | immune response-                        |                       |    |       |       |
| Ontology - Biological Process | regulating signaling pathway            | experimental (strong) | 11 | 4.878 | 0.034 |
| Gene                          |                                         |                       |    |       |       |
| Ontology - Biological Process | tissue homeostasis                      | experimental (strong) | 6  | 1.781 | 0.034 |
| Gene                          |                                         |                       |    |       |       |
| Ontology - Biological Process | astrocyte differentiation               | experimental (any)    | 4  | 0.917 | 0.034 |
| Gene                          | positive regulation of                  |                       |    |       |       |
| Ontology - Biological Process | axonogenesis                            | experimental (any)    | 4  | 0.917 | 0.034 |
| Gene                          | positive regulation of cellular protein |                       |    |       |       |
| Ontology - Biological Process | localization                            | experimental (any)    | 9  | 3.76  | 0.034 |
| Gene                          | positive regulation of                  |                       |    |       |       |
| Ontology - Biological Process | organellar organization                 | experimental (any)    | 14 | 7.188 | 0.034 |
| Gene                          |                                         |                       |    |       |       |
| Ontology - Biological Process | Notch signaling pathway                 | experimental (strong) | 6  | 1.807 | 0.035 |
| Gene                          |                                         |                       |    |       |       |
| Ontology - Biological Process | T cell mediated immunity                | experimental (strong) | 4  | 0.826 | 0.035 |

|                               |                                                                  |                       |    |       |       |
|-------------------------------|------------------------------------------------------------------|-----------------------|----|-------|-------|
| Gene                          | T-helper 1                                                       |                       |    |       |       |
| Ontology - Biological Process | immune response                                                  | experimental (strong) | 3  | 0.439 | 0.035 |
| Gene                          |                                                                  |                       |    |       |       |
| Ontology - Biological Process | activation of MAPK activity                                      | experimental (strong) | 7  | 2.349 | 0.035 |
| Gene                          |                                                                  |                       |    |       |       |
| Ontology - Biological Process | blood circulation                                                | experimental (strong) | 10 | 4.259 | 0.035 |
| Gene                          | cardiac atrium                                                   |                       |    |       |       |
| Ontology - Biological Process | morphogenesis                                                    | experimental (strong) | 3  | 0.439 | 0.035 |
| Gene                          |                                                                  |                       |    |       |       |
| Ontology - Biological Process | extrinsic apoptotic signaling pathway via death domain receptors | experimental (strong) | 5  | 1.291 | 0.035 |
| Gene                          |                                                                  |                       |    |       |       |
| Ontology - Biological Process | necroptotic process                                              | experimental (strong) | 3  | 0.439 | 0.035 |
| Gene                          |                                                                  |                       |    |       |       |
| Ontology - Biological Process | negative regulation of chemotaxis                                | experimental (strong) | 3  | 0.439 | 0.035 |
| Gene                          |                                                                  |                       |    |       |       |
| Ontology - Biological Process | negative regulation of epithelial cell migration                 | experimental (strong) | 4  | 0.826 | 0.035 |
| Gene                          |                                                                  |                       |    |       |       |
| Ontology - Biological Process | positive regulation of BMP signaling pathway                     | experimental (strong) | 3  | 0.439 | 0.035 |

Gene positive regulation of cytokine experimental biosynthetic process (strong) 4 0.826 0.035

Gene positive regulation of interleukin-10 experimental production (strong) 3 0.439 0.035

Gene positive regulation of interleukin-8 experimental production (strong) 3 0.439 0.035

Gene positive regulation of mitotic cell cycle experimental phase transition (strong) 4 0.826 0.035

Gene positive regulation of tumor necrosis factor experimental production (strong) 4 0.826 0.035

Gene regulation of cytokine experimental biosynthetic process (strong) 5 1.291 0.035

Gene regulation of nitric oxide experimental biosynthetic process (strong) 4 0.826 0.035

|                               |                                                    |                    |     |       |       |
|-------------------------------|----------------------------------------------------|--------------------|-----|-------|-------|
| Gene                          | regulation of smooth muscle                        |                    |     |       |       |
| Ontology - Biological Process | cell proliferation (strong)                        | experimental       | 7   | 2.375 | 0.035 |
| Gene                          | smooth muscle                                      |                    |     |       |       |
| Ontology - Biological Process | cell proliferation (strong)                        | experimental       | 7   | 2.375 | 0.035 |
| Gene                          | stress-activated MAPK cascade                      |                    |     |       |       |
| Ontology - Biological Process | activated MAPK cascade (strong)                    | experimental       | 9   | 3.588 | 0.035 |
| Gene                          | actin polymerization or depolymerization           |                    |     |       |       |
| Ontology - Biological Process | actin polymerization or depolymerization           | experimental (any) | 6   | 1.966 | 0.035 |
| Gene                          | activation of cysteine-type endopeptidase activity |                    |     |       |       |
| Ontology - Biological Process | involved in apoptotic process                      | experimental (any) | 4   | 0.930 | 0.035 |
| Gene                          |                                                    |                    |     |       |       |
| Ontology - Biological Process | biological process                                 | experimental (any) | 183 | 172.5 | 0.035 |
| Gene                          |                                                    |                    |     |       |       |
| Ontology - Biological Process | cell-matrix adhesion                               | experimental (any) | 7   | 2.538 | 0.035 |
| Gene                          |                                                    |                    |     |       |       |
| Ontology - Biological Process | cell-substrate adhesion                            | experimental (any) | 9   | 3.8   | 0.035 |
| Gene                          |                                                    |                    |     |       |       |
| Ontology - Biological Process | chemokine production                               | experimental (any) | 4   | 0.930 | 0.035 |

|            |                      |                    |    |       |       |
|------------|----------------------|--------------------|----|-------|-------|
| Gene       | developmental growth |                    |    |       |       |
| Ontology - | involved in          |                    |    |       |       |
| Biological | morphogenesis        | experimental (any) | 7  | 2.551 | 0.035 |
| Process    | enzyme linked        |                    |    |       |       |
| Gene       | receptor             |                    |    |       |       |
| Ontology - | protein              |                    |    |       |       |
| Biological | signaling pathway    | experimental (any) | 19 | 10.98 | 0.035 |
| Process    | establishment of     |                    |    |       |       |
| Gene       | protein              |                    |    |       |       |
| Ontology - | localization         | experimental (any) | 32 | 21.52 | 0.035 |
| Biological | macromolecule        |                    |    |       |       |
| Process    | glycosylation        | experimental (any) | 7  | 2.551 | 0.035 |
| Gene       | macrophage           |                    |    |       |       |
| Ontology - | gene                 |                    |    |       |       |
| Biological | differentiation      | experimental (any) | 3  | 0.505 | 0.035 |
| Process    |                      |                    |    |       |       |
| Gene       | negative regulation  |                    |    |       |       |
| Ontology - | of T cell            |                    |    |       |       |
| Biological | apoptotic process    | experimental (any) | 2  | 0.186 | 0.035 |
| Process    |                      |                    |    |       |       |
| Gene       | negative regulation  |                    |    |       |       |
| Ontology - | of gene              |                    |    |       |       |
| Biological | silencing by miRNA   | experimental (any) | 2  | 0.186 | 0.035 |
| Process    |                      |                    |    |       |       |
| Gene       | negative regulation  |                    |    |       |       |
| Ontology - | of interleukin-      |                    |    |       |       |
| Biological | 17                   | experimental (any) | 2  | 0.186 | 0.035 |
| Process    | production           |                    |    |       |       |

|                                    |                                                          |                    |     |       |       |
|------------------------------------|----------------------------------------------------------|--------------------|-----|-------|-------|
| Gene Ontology - Biological Process | negative regulation of intracellular signal transduction | experimental (any) | 12  | 5.806 | 0.035 |
| Gene Ontology - Biological Process | negative regulation of viral entry into host cell        | experimental (any) | 2   | 0.186 | 0.035 |
| Gene Ontology - Biological Process | nitrogen compound metabolic process                      | experimental (any) | 120 | 104.1 | 0.035 |
| Gene Ontology - Biological Process | positive regulation of T cell differentiation            | experimental (any) | 2   | 0.186 | 0.035 |
| Gene Ontology - Biological Process | positive regulation of type 2 immune response            | experimental (any) | 2   | 0.186 | 0.035 |
| Gene Ontology - Biological Process | protein glycosylation                                    | experimental (any) | 7   | 2.551 | 0.035 |
| Gene Ontology - Biological Process | protein ubiquitination                                   | experimental (any) | 17  | 9.447 | 0.035 |
| Gene Ontology - Biological Process | regulation of cell cycle G1/S phase transition           | experimental (any) | 6   | 1.953 | 0.035 |



|                                    |                                                  |                       |    |       |       |
|------------------------------------|--------------------------------------------------|-----------------------|----|-------|-------|
| Gene Ontology - Biological Process | regulation of stress-activated MAPK cascade      | experimental (any)    | 7  | 2.538 | 0.035 |
| Gene Ontology - Biological Process | regulation of transcription by RNA polymerase II | experimental (any)    | 41 | 29.2  | 0.035 |
| Gene Ontology - Biological Process | regulation of wound healing                      | experimental (any)    | 5  | 1.422 | 0.035 |
| Gene Ontology - Biological Process | response to antibiotic                           | experimental (any)    | 9  | 3.8   | 0.035 |
| Gene Ontology - Biological Process | response to fungus                               | experimental (any)    | 3  | 0.505 | 0.035 |
| Gene Ontology - Biological Process | toll-like receptor 2 signaling pathway           | experimental (any)    | 2  | 0.186 | 0.035 |
| Gene Ontology - Biological Process | ventricular septum development                   | experimental (any)    | 4  | 0.930 | 0.035 |
| Gene Ontology - Biological Process | developmental cell growth                        | predicted (union)     | 92 | 69.11 | 0.036 |
| Gene Ontology - Biological Process | regulation of axonogenesis                       | predicted (union)     | 70 | 50.37 | 0.036 |
| Gene Ontology - Biological Process | Ras protein signal transduction                  | experimental (strong) | 8  | 2.994 | 0.036 |

|                    |                                                             |                    |    |       |       |
|--------------------|-------------------------------------------------------------|--------------------|----|-------|-------|
| Gene               | T-helper 1                                                  |                    |    |       |       |
| Ontology - type    |                                                             |                    |    |       |       |
| Biological Process | immune response                                             | experimental (any) | 3  | 0.518 | 0.036 |
| Gene               |                                                             |                    |    |       |       |
| Ontology - type    |                                                             |                    |    |       |       |
| Biological Process | amide transport                                             | experimental (any) | 31 | 20.75 | 0.036 |
| Gene               |                                                             |                    |    |       |       |
| Ontology - type    |                                                             |                    |    |       |       |
| Biological Process | cell cycle                                                  | experimental (any) | 30 | 19.94 | 0.036 |
| Gene               |                                                             |                    |    |       |       |
| Ontology - type    |                                                             |                    |    |       |       |
| Biological Process | morphogenesis                                               | experimental (any) | 18 | 10.26 | 0.036 |
| Gene               |                                                             |                    |    |       |       |
| Ontology - type    |                                                             |                    |    |       |       |
| Biological Process | positive regulation of cell cycle                           |                    |    |       |       |
| Gene               | G1/S                                                        |                    |    |       |       |
| Ontology - type    |                                                             |                    |    |       |       |
| Biological Process | phase transition                                            | experimental (any) | 3  | 0.518 | 0.036 |
| Gene               |                                                             |                    |    |       |       |
| Ontology - type    |                                                             |                    |    |       |       |
| Biological Process | positive regulation of cysteine-type endopeptidase activity |                    |    |       |       |
| Gene               |                                                             |                    |    |       |       |
| Ontology - type    |                                                             |                    |    |       |       |
| Biological Process | involved in apoptotic process                               | experimental (any) | 5  | 1.448 | 0.036 |
| Gene               |                                                             |                    |    |       |       |
| Ontology - type    |                                                             |                    |    |       |       |
| Biological Process | regulation of Ras protein                                   |                    |    |       |       |
| Gene               |                                                             |                    |    |       |       |
| Ontology - type    |                                                             |                    |    |       |       |
| Biological Process | signal transduction                                         | experimental (any) | 7  | 2.564 | 0.036 |
| Gene               |                                                             |                    |    |       |       |
| Ontology - type    |                                                             |                    |    |       |       |
| Biological Process | regulation of protein complex assembly                      | experimental (any) | 10 | 4.491 | 0.036 |

|                       |                                                                             |                              |     |       |       |
|-----------------------|-----------------------------------------------------------------------------|------------------------------|-----|-------|-------|
| Gene                  | regulation<br>of stress-<br>activated<br>protein<br>kinase                  |                              |     |       |       |
| Biological<br>Process | signaling<br>cascade                                                        | experimen<br>tal (any)       | 7   | 2.564 | 0.036 |
| Gene                  | response<br>to                                                              |                              |     |       |       |
| Biological<br>Process | extracellul<br>ar<br>stimulus                                               | experimen<br>tal (any)       | 12  | 5.846 | 0.036 |
| Gene                  | response<br>to osmotic<br>stress                                            |                              |     |       |       |
| Biological<br>Process | transcripti<br>on by<br>RNA<br>polymeras<br>e II                            | experimen<br>tal (any)       | 4   | 0.943 | 0.036 |
| Gene                  | regulation<br>of actin<br>cytoskelet<br>on                                  |                              |     |       |       |
| Biological<br>Process | organizati<br>on                                                            | predicted<br>(union)         | 128 | 100.7 | 0.037 |
| Gene                  | cellular<br>response<br>to insulin-<br>like<br>growth<br>factor<br>stimulus |                              |     |       |       |
| Biological<br>Process | cellular<br>response<br>to<br>lipoteichoic<br>acid                          | experimen<br>tal<br>(strong) | 2   | 0.155 | 0.037 |
| Gene                  | response<br>to                                                              |                              |     |       |       |
| Biological<br>Process | lipoteichoic<br>acid                                                        | experimen<br>tal<br>(strong) | 2   | 0.155 | 0.037 |

|                               |                                                              |    |       |       |  |
|-------------------------------|--------------------------------------------------------------|----|-------|-------|--|
| Gene                          | detection of mechanical stimulus                             |    |       |       |  |
| Ontology - Biological Process | involved in experimental sensory perception (strong)         | 2  | 0.155 | 0.037 |  |
| Gene                          | detection of temperature stimulus                            |    |       |       |  |
| Ontology - Biological Process | involved in experimental sensory perception of pain (strong) | 2  | 0.155 | 0.037 |  |
| Gene                          | histone H3-K9 acetylation                                    |    |       |       |  |
| Ontology - Biological Process | experimental acetylation (strong)                            | 2  | 0.155 | 0.037 |  |
| Gene                          | homeostatic process                                          |    |       |       |  |
| Ontology - Biological Process | experimental homeostatic process (strong)                    | 22 | 13.47 | 0.037 |  |
| Gene                          | negative regulation of leukocyte chemotaxis                  |    |       |       |  |
| Ontology - Biological Process | experimental chemotaxis (strong)                             | 2  | 0.155 | 0.037 |  |
| Gene                          | positive regulation of cellular component                    |    |       |       |  |
| Ontology - Biological Process | experimental biogenesis (strong)                             | 10 | 4.31  | 0.037 |  |
| Gene                          | positive regulation of histone H3-K4 methylation             |    |       |       |  |
| Ontology - Biological Process | experimental methylation (strong)                            | 2  | 0.155 | 0.037 |  |

|                               |                                                   |                       |    |       |       |
|-------------------------------|---------------------------------------------------|-----------------------|----|-------|-------|
| Gene                          | positive regulation                               |                       |    |       |       |
| Ontology - Biological Process | of protein polymerization                         | experimental (strong) | 4  | 0.852 | 0.037 |
| Gene                          |                                                   |                       |    |       |       |
| Ontology - Biological Process | pro-B cell differentiation                        | experimental (strong) | 2  | 0.155 | 0.037 |
| Gene                          | regulation of cytokine-mediated signaling pathway |                       |    |       |       |
| Ontology - Biological Process | regulation of ion transport                       | experimental (strong) | 6  | 1.833 | 0.037 |
| Gene                          |                                                   |                       |    |       |       |
| Ontology - Biological Process | regulation of ion transport                       | experimental (strong) | 10 | 4.31  | 0.037 |
| Gene                          |                                                   |                       |    |       |       |
| Ontology - Biological Process | response to peptide hormone                       | experimental (strong) | 10 | 4.31  | 0.037 |
| Gene                          | anatomical structure formation                    |                       |    |       |       |
| Ontology - Biological Process | involved in morphogenesis                         | experimental (strong) | 20 | 11.85 | 0.038 |
| Gene                          |                                                   |                       |    |       |       |
| Ontology - Biological Process | cerebral cortex cell migration                    | experimental (any)    | 3  | 0.531 | 0.038 |
| Gene                          |                                                   |                       |    |       |       |
| Ontology - Biological Process | generation of neurons                             | experimental (any)    | 25 | 15.89 | 0.038 |
| Gene                          |                                                   |                       |    |       |       |
| Ontology - Biological Process | myelination                                       | experimental (any)    | 5  | 1.462 | 0.038 |
| Gene                          | negative regulation of BMP signaling pathway      |                       |    |       |       |
| Ontology - Biological Process | negative regulation of BMP signaling pathway      | experimental (any)    | 3  | 0.531 | 0.038 |

|                                    |                                                                     |                       |     |       |       |
|------------------------------------|---------------------------------------------------------------------|-----------------------|-----|-------|-------|
| Gene Ontology - Biological Process | negative regulation of G protein-coupled receptor signaling pathway | experimental (any)    | 3   | 0.531 | 0.038 |
| Gene Ontology - Biological Process | response to carbohydrate                                            | experimental (any)    | 7   | 2.604 | 0.038 |
| Gene Ontology - Biological Process | response to metal ion                                               | experimental (any)    | 9   | 3.867 | 0.038 |
| Gene Ontology - Biological Process | response to reactive oxygen species                                 | experimental (any)    | 7   | 2.604 | 0.038 |
| Gene Ontology - Biological Process | unsaturated fatty acid biosynthetic process                         | experimental (any)    | 3   | 0.531 | 0.038 |
| Gene Ontology - Biological Process | cellular protein localization                                       | predicted (union)     | 612 | 551.7 | 0.039 |
| Gene Ontology - Biological Process | cardiac ventricle morphogenesis                                     | experimental (strong) | 4   | 0.878 | 0.039 |
| Gene Ontology - Biological Process | cell development                                                    | experimental (strong) | 26  | 17.01 | 0.039 |
| Gene Ontology - Biological Process | cellular response to tumor necrosis factor                          | experimental (strong) | 7   | 2.452 | 0.039 |
| Gene Ontology - Biological Process | detection of abiotic stimulus                                       | experimental (strong) | 3   | 0.465 | 0.039 |

|            |              |           |    |       |       |
|------------|--------------|-----------|----|-------|-------|
| Gene       | endothelia   |           |    |       |       |
| Ontology - | l cell       | experimen |    |       |       |
| Biological | differentia  | tal       |    |       |       |
| Process    | tion         | (strong)  | 5  | 1.342 | 0.039 |
| Gene       |              |           |    |       |       |
| Ontology - | fatty acid   | experimen |    |       |       |
| Biological | biosynthet   | tal       |    |       |       |
| Process    | ic process   | (strong)  | 4  | 0.878 | 0.039 |
| Gene       |              |           |    |       |       |
| Ontology - | gene         | experimen |    |       |       |
| Biological | silencing    | tal       |    |       |       |
| Process    | by RNA       | (strong)  | 5  | 1.342 | 0.039 |
| Gene       |              |           |    |       |       |
| Ontology - | glial cell   | experimen |    |       |       |
| Biological | developm     | tal       |    |       |       |
| Process    | ent          | (strong)  | 5  | 1.342 | 0.039 |
| Gene       |              |           |    |       |       |
| Ontology - |              | experimen |    |       |       |
| Biological | hemopoie     | tal       |    |       |       |
| Process    | sis          | (strong)  | 16 | 8.698 | 0.039 |
| Gene       |              |           |    |       |       |
| Ontology - | interleukin- | experimen |    |       |       |
| Biological | 17           | tal       |    |       |       |
| Process    | production   | (strong)  | 3  | 0.465 | 0.039 |
| Gene       | muscle       |           |    |       |       |
| Ontology - | tissue       | experimen |    |       |       |
| Biological | morphoge     | tal       |    |       |       |
| Process    | nesis        | (strong)  | 4  | 0.878 | 0.039 |
| Gene       | myeloid      |           |    |       |       |
| Ontology - | cell         | experimen |    |       |       |
| Biological | apoptotic    | tal       |    |       |       |
| Process    | process      | (strong)  | 3  | 0.465 | 0.039 |
|            | negative     |           |    |       |       |
|            | regulation   |           |    |       |       |
| Gene       | of cellular  |           |    |       |       |
| Ontology - | componen     | experimen |    |       |       |
| Biological | t            | tal       |    |       |       |
| Process    | movement     | (strong)  | 8  | 3.072 | 0.039 |
|            | negative     |           |    |       |       |
|            | regulation   |           |    |       |       |
| Gene       | of           |           |    |       |       |
| Ontology - | sprouting    | experimen |    |       |       |
| Biological | angiogene    | tal       |    |       |       |
| Process    | sis          | (strong)  | 3  | 0.465 | 0.039 |

|            |             |           |    |       |       |
|------------|-------------|-----------|----|-------|-------|
| Gene       | positive    |           |    |       |       |
| Ontology - | regulation  | experimen |    |       |       |
| Biological | of DNA      | tal       |    |       |       |
| Process    | replication | (strong)  | 3  | 0.465 | 0.039 |
| Gene       | positive    |           |    |       |       |
| Ontology - | regulation  |           |    |       |       |
| Biological | of T cell   | experimen |    |       |       |
| Process    | mediated    | tal       |    |       |       |
|            | immunity    | (strong)  | 3  | 0.465 | 0.039 |
| Gene       | positive    |           |    |       |       |
| Ontology - | regulation  |           |    |       |       |
| Biological | of cell     | experimen |    |       |       |
| Process    | cycle       | tal       |    |       |       |
|            | phase       | (strong)  | 4  | 0.878 | 0.039 |
|            | transition  |           |    |       |       |
| Gene       | positive    |           |    |       |       |
| Ontology - | regulation  |           |    |       |       |
| Biological | of cyclin-  |           |    |       |       |
| Process    | dependen    |           |    |       |       |
|            | t protein   |           |    |       |       |
|            | serine/thr  |           |    |       |       |
| Gene       | eonine      | experimen |    |       |       |
| Ontology - | kinase      | tal       |    |       |       |
| Biological | activity    | (strong)  | 3  | 0.465 | 0.039 |
| Process    |             |           |    |       |       |
| Gene       | positive    |           |    |       |       |
| Ontology - | regulation  | experimen |    |       |       |
| Biological | of protein  | tal       |    |       |       |
| Process    | transport   | (strong)  | 9  | 3.691 | 0.039 |
|            | regulation  |           |    |       |       |
|            | of          |           |    |       |       |
|            | establish   |           |    |       |       |
| Gene       | ment of     |           |    |       |       |
| Ontology - | protein     | experimen |    |       |       |
| Biological | localizatio | tal       |    |       |       |
| Process    | n           | (strong)  | 13 | 6.453 | 0.039 |
|            | regulation  |           |    |       |       |
|            | of          |           |    |       |       |
| Gene       | oligodendr  |           |    |       |       |
| Ontology - | ocyte       | experimen |    |       |       |
| Biological | differentia | tal       |    |       |       |
| Process    | tion        | (strong)  | 3  | 0.465 | 0.039 |



|                    |                     |                    |    |       |       |
|--------------------|---------------------|--------------------|----|-------|-------|
| Gene               | alpha-beta T cell   |                    |    |       |       |
| Ontology -         | lineage             |                    |    |       |       |
| Biological Process | commitment          | experimental (any) | 2  | 0.199 | 0.039 |
| Gene               |                     |                    |    |       |       |
| Ontology -         |                     |                    |    |       |       |
| Biological Process | axonogenesis        | experimental (any) | 10 | 4.544 | 0.039 |
| Gene               |                     |                    |    |       |       |
| Ontology -         | calcium             |                    |    |       |       |
| Biological Process | ion transport       | experimental (any) | 10 | 4.544 | 0.039 |
| Gene               |                     |                    |    |       |       |
| Ontology -         | cell                |                    |    |       |       |
| Biological Process | junction assembly   | experimental (any) | 7  | 2.631 | 0.039 |
| Gene               | detection           |                    |    |       |       |
| Gene               | of                  |                    |    |       |       |
| Ontology -         | temperature         |                    |    |       |       |
| Biological Process | response            | experimental (any) | 2  | 0.199 | 0.039 |
| Gene               | lymph               |                    |    |       |       |
| Ontology -         | node                |                    |    |       |       |
| Biological Process | development         | experimental (any) | 2  | 0.199 | 0.039 |
| Gene               |                     |                    |    |       |       |
| Ontology -         | macrophage          |                    |    |       |       |
| Biological Process | cytokine production | experimental (any) | 2  | 0.199 | 0.039 |
| Gene               | metanephric         |                    |    |       |       |
| Gene               | mesenchy            |                    |    |       |       |
| Ontology -         | me                  |                    |    |       |       |
| Biological Process | development         | experimental (any) | 2  | 0.199 | 0.039 |
| Gene               |                     |                    |    |       |       |
| Ontology -         | peptide             |                    |    |       |       |
| Biological Process | hormone secretion   | experimental (any) | 7  | 2.631 | 0.039 |
| Gene               |                     |                    |    |       |       |
| Ontology -         | positive regulation |                    |    |       |       |
| Gene               | of                  |                    |    |       |       |
| Ontology -         | monocyte            |                    |    |       |       |
| Biological Process | chemotaxis          | experimental (any) | 2  | 0.199 | 0.039 |

|                    |                                          |                          |     |       |       |
|--------------------|------------------------------------------|--------------------------|-----|-------|-------|
| Gene               | regulation of hydrogen peroxide          |                          |     |       |       |
| Biological Process | metabolic process                        | experimental (any)       | 2   | 0.199 | 0.039 |
| Gene               | response to muscle stretch               |                          |     |       |       |
| Biological Process | to muscle stretch                        | experimental (any)       | 2   | 0.199 | 0.039 |
| Gene               | Wnt signaling pathway                    | predicted (intersection) | 108 | 79.27 | 0.040 |
| Gene               | neurogenesis                             | predicted (intersection) | 284 | 236.5 | 0.040 |
| Gene               | positive regulation of metabolic process | predicted (intersection) | 591 | 525.2 | 0.040 |
| Gene               | tube development                         | predicted (intersection) | 201 | 161.2 | 0.040 |
| Gene               | intracellular protein transport          | predicted (union)        | 352 | 306.1 | 0.040 |
| Gene               | nucleocytoplasmic transport              | predicted (union)        | 133 | 105.4 | 0.040 |
| Gene               | actin cytoskeleton organization          | experimental (strong)    | 10  | 4.388 | 0.040 |
| Gene               | metabolic process                        | experimental (strong)    | 63  | 55.21 | 0.040 |

|            |                                          |           |    |       |       |
|------------|------------------------------------------|-----------|----|-------|-------|
| Gene       | negative regulation                      |           |    |       |       |
| Ontology - | of                                       | experimen |    |       |       |
| Biological | angiogene                                | tal       |    |       |       |
| Process    | sis                                      | (strong)  | 5  | 1.368 | 0.040 |
| Gene       | regulation of I-kappaB                   |           |    |       |       |
| Ontology - | kinase/NF-                               | experimen |    |       |       |
| Biological | kappaB                                   | tal       |    |       |       |
| Process    | signaling                                | (strong)  | 7  | 2.478 | 0.040 |
| Gene       | regulation of type I interferon          |           |    |       |       |
| Ontology - | of type I                                | experimen |    |       |       |
| Biological | interferon                               | tal       |    |       |       |
| Process    | production                               | (strong)  | 5  | 1.368 | 0.040 |
| Gene       | response to                              |           |    |       |       |
| Ontology - | to                                       | experimen |    |       |       |
| Biological | carbohydr                                | tal       |    |       |       |
| Process    | ate                                      | (strong)  | 7  | 2.478 | 0.040 |
| Gene       | response to toxic substance              |           |    |       |       |
| Ontology - | response                                 | experimen |    |       |       |
| Biological | to toxic                                 | tal       |    |       |       |
| Process    | substance                                | (strong)  | 11 | 5.085 | 0.040 |
| Gene       | regulation of type I interferon          |           |    |       |       |
| Ontology - | type I                                   | experimen |    |       |       |
| Biological | interferon                               | tal       |    |       |       |
| Process    | production                               | (strong)  | 5  | 1.368 | 0.040 |
| Gene       | embryonic epithelial tube                |           |    |       |       |
| Ontology - | epithelial                               | experimen |    |       |       |
| Biological | tube                                     | tal (any) | 5  | 1.488 | 0.040 |
| Process    | formation                                | tal (any) | 5  | 1.488 | 0.040 |
| Gene       | import into cell                         |           |    |       |       |
| Ontology - | import into                              | experimen |    |       |       |
| Biological | import into                              | tal (any) | 13 | 6.697 | 0.040 |
| Process    | cell                                     | tal (any) | 13 | 6.697 | 0.040 |
| Gene       | positive regulation of cytokine-mediated |           |    |       |       |
| Ontology - | positive                                 | experimen |    |       |       |
| Biological | regulation                               | tal (any) | 3  | 0.545 | 0.040 |
| Process    | of                                       | tal (any) | 3  | 0.545 | 0.040 |
| Gene       | cytokine-mediated signaling pathway      |           |    |       |       |
| Ontology - | cytokine-                                | experimen |    |       |       |
| Biological | mediated                                 | tal (any) | 3  | 0.545 | 0.040 |
| Process    | signaling                                | tal (any) | 3  | 0.545 | 0.040 |
| Gene       | protein transport                        |           |    |       |       |
| Ontology - | protein                                  | experimen |    |       |       |
| Biological | transport                                | tal (any) | 30 | 20.14 | 0.040 |
| Process    | transport                                | tal (any) | 30 | 20.14 | 0.040 |

|                       |                      |                          |     |       |       |
|-----------------------|----------------------|--------------------------|-----|-------|-------|
| Gene                  |                      |                          |     |       |       |
| Ontology - regulation |                      |                          |     |       |       |
| Biological Process    | of body fluid levels | experimental (any)       | 11  | 5.275 | 0.040 |
| Gene                  | regulation           |                          |     |       |       |
| Ontology - of         |                      |                          |     |       |       |
| Biological Process    | cytokine secretion   | experimental (any)       | 6   | 2.046 | 0.040 |
| Gene                  | temperature          |                          |     |       |       |
| Ontology - re         |                      |                          |     |       |       |
| Biological Process    | homeostasis          | experimental (any)       | 6   | 2.046 | 0.040 |
| Gene                  | ventricular          |                          |     |       |       |
| Ontology - septum     |                      |                          |     |       |       |
| Biological Process    | morphogenesis        | experimental (any)       | 3   | 0.545 | 0.040 |
| Gene                  | cellular response    |                          |     |       |       |
| Ontology - to peptide |                      |                          |     |       |       |
| Biological Process    | hormone stimulus     | predicted (intersection) | 68  | 45.81 | 0.041 |
| Gene                  |                      |                          |     |       |       |
| Ontology - heart      |                      |                          |     |       |       |
| Biological Process    | development          | predicted (union)        | 224 | 187.8 | 0.041 |
| Gene                  |                      |                          |     |       |       |
| Ontology -            |                      |                          |     |       |       |
| Biological Process    | hippo signaling      | predicted (union)        | 24  | 13.67 | 0.041 |
| Gene                  |                      |                          |     |       |       |
| Ontology - regulation |                      |                          |     |       |       |
| Biological Process    | of translation       | predicted (union)        | 146 | 117.1 | 0.041 |
| Gene                  | roof of              |                          |     |       |       |
| Ontology - mouth      |                      |                          |     |       |       |
| Biological Process    | development          | predicted (union)        | 47  | 31.63 | 0.041 |
| Gene                  | Fc                   |                          |     |       |       |
| Ontology - receptor   |                      |                          |     |       |       |
| Biological Process    | signaling pathway    | experimental (strong)    | 6   | 1.91  | 0.041 |
| Gene                  |                      |                          |     |       |       |
| Ontology - leukocyte  |                      |                          |     |       |       |
| Biological Process    | differentiation      | experimental (strong)    | 12  | 5.808 | 0.041 |

|            |                           |    |       |       |  |
|------------|---------------------------|----|-------|-------|--|
| Gene       | stem cell                 |    |       |       |  |
| Ontology - | population experimen      |    |       |       |  |
| Biological | maintenan tal             |    |       |       |  |
| Process    | ce (strong)               | 6  | 1.91  | 0.041 |  |
| Gene       | regulation                |    |       |       |  |
| Ontology - | of cardiac                |    |       |       |  |
| Biological | muscle                    |    |       |       |  |
| Process    | tissue developm experimen |    |       |       |  |
| Process    | ent tal (any)             | 4  | 0.997 | 0.041 |  |
| Gene       |                           |    |       |       |  |
| Ontology - |                           |    |       |       |  |
| Biological | response experimen        |    |       |       |  |
| Process    | to ethanol tal (any)      | 5  | 1.501 | 0.041 |  |
| Gene       | anatomica                 |    |       |       |  |
| Ontology - | l structure experimen     |    |       |       |  |
| Biological | morphoge tal              |    |       |       |  |
| Process    | nesis (strong)            | 32 | 22.58 | 0.042 |  |
| Gene       | cellular                  |    |       |       |  |
| Ontology - | response                  |    |       |       |  |
| Biological | to DNA experimen          |    |       |       |  |
| Process    | damage tal                |    |       |       |  |
| Process    | stimulus (strong)         | 12 | 5.859 | 0.042 |  |
| Gene       |                           |    |       |       |  |
| Ontology - | cytokine experimen        |    |       |       |  |
| Biological | biosynthet tal            |    |       |       |  |
| Process    | ic process (strong)       | 5  | 1.394 | 0.042 |  |
| Gene       |                           |    |       |       |  |
| Ontology - | cytokine experimen        |    |       |       |  |
| Biological | metabolic tal             |    |       |       |  |
| Process    | process (strong)          | 5  | 1.394 | 0.042 |  |
| Gene       |                           |    |       |       |  |
| Ontology - | epithelium experimen      |    |       |       |  |
| Biological | developm tal              |    |       |       |  |
| Process    | ent (strong)              | 19 | 11.25 | 0.042 |  |
| Gene       |                           |    |       |       |  |
| Ontology - | liver experimen           |    |       |       |  |
| Biological | regenerati tal            |    |       |       |  |
| Process    | on (strong)               | 3  | 0.490 | 0.042 |  |
| Gene       | macroph                   |    |       |       |  |
| Ontology - | ge derived experimen      |    |       |       |  |
| Biological | foam cell tal             |    |       |       |  |
| Process    | differentia tal           |    |       |       |  |
| Process    | tion (strong)             | 3  | 0.490 | 0.042 |  |

|                               |                                                                 |                       |   |       |       |
|-------------------------------|-----------------------------------------------------------------|-----------------------|---|-------|-------|
| Gene                          |                                                                 |                       |   |       |       |
| Ontology - Biological Process | neuroinflammatory response                                      | experimental (strong) | 4 | 0.903 | 0.042 |
| Gene                          | tract                                                           |                       |   |       |       |
| Ontology - Biological Process | septum morphogenesis                                            | experimental (strong) | 3 | 0.490 | 0.042 |
| Gene                          |                                                                 |                       |   |       |       |
| Ontology - Biological Process | peptide biosynthetic process                                    | experimental (strong) | 8 | 3.123 | 0.042 |
| Gene                          |                                                                 |                       |   |       |       |
| Ontology - Biological Process | positive regulation of cyclin-dependent protein kinase activity | experimental (strong) | 3 | 0.490 | 0.042 |
| Gene                          |                                                                 |                       |   |       |       |
| Ontology - Biological Process | positive regulation of receptor signaling pathway via JAK-STAT  | experimental (strong) | 4 | 0.903 | 0.042 |
| Gene                          |                                                                 |                       |   |       |       |
| Ontology - Biological Process | receptor signaling pathway via STAT                             | experimental (strong) | 4 | 0.903 | 0.042 |
| Gene                          |                                                                 |                       |   |       |       |
| Ontology - Biological Process | response to xenobiotic stimulus                                 | experimental (strong) | 7 | 2.504 | 0.042 |
| Gene                          |                                                                 |                       |   |       |       |
| Ontology - Biological Process | axon ensheathment                                               | experimental (any)    | 5 | 1.515 | 0.042 |

|                                    |                                                               |                          |     |       |       |
|------------------------------------|---------------------------------------------------------------|--------------------------|-----|-------|-------|
| Gene Ontology - Biological Process | cellular response to transforming growth factor beta stimulus | experimental (any)       | 7   | 2.671 | 0.042 |
| Gene Ontology - Biological Process | glycosylation                                                 | experimental (any)       | 7   | 2.671 | 0.042 |
| Gene Ontology - Biological Process | positive regulation of biomineral tissue development          | experimental (any)       | 3   | 0.558 | 0.042 |
| Gene Ontology - Biological Process | erythrocyte differentiation                                   | experimental (any)       | 3   | 0.558 | 0.042 |
| Gene Ontology - Biological Process | regulation of lymphocyte apoptotic process                    | experimental (any)       | 3   | 0.558 | 0.042 |
| Gene Ontology - Biological Process | cardiac septum morphogenesis                                  | predicted (intersection) | 24  | 11.99 | 0.043 |
| Gene Ontology - Biological Process | nuclear transport                                             | predicted (union)        | 134 | 106.6 | 0.043 |
| Gene Ontology - Biological Process | G protein-coupled receptor signaling pathway                  | experimental (strong)    | 10  | 4.465 | 0.043 |
| Gene Ontology - Biological Process | actin filament polymerization                                 | experimental (strong)    | 4   | 0.929 | 0.043 |

|            |             |           |    |       |       |
|------------|-------------|-----------|----|-------|-------|
| Gene       |             |           |    |       |       |
| Ontology - |             | experimen |    |       |       |
| Biological | body fluid  | tal       |    |       |       |
| Process    | secretion   | (strong)  | 4  | 0.929 | 0.043 |
| Gene       | coronary    |           |    |       |       |
| Ontology - | artery      | experimen |    |       |       |
| Biological | morphoge    | tal       |    |       |       |
| Process    | nesis       | (strong)  | 2  | 0.181 | 0.043 |
|            | detection   |           |    |       |       |
| Gene       | of          |           |    |       |       |
| Ontology - | temperatu   | experimen |    |       |       |
| Biological | re          | tal       |    |       |       |
| Process    | stimulus    | (strong)  | 2  | 0.181 | 0.043 |
| Gene       |             |           |    |       |       |
| Ontology - | forebrain   | experimen |    |       |       |
| Biological | developm    | tal       |    |       |       |
| Process    | ent         | (strong)  | 9  | 3.82  | 0.043 |
|            | immune      |           |    |       |       |
|            | response-   |           |    |       |       |
|            | activating  |           |    |       |       |
| Gene       |             |           |    |       |       |
| Ontology - | signal      | experimen |    |       |       |
| Biological | transducti  | tal       |    |       |       |
| Process    | on          | (strong)  | 10 | 4.465 | 0.043 |
| Gene       |             |           |    |       |       |
| Ontology - | leukocyte   | experimen |    |       |       |
| Biological | apoptotic   | tal       |    |       |       |
| Process    | process     | (strong)  | 5  | 1.42  | 0.043 |
| Gene       | mesenchy    |           |    |       |       |
| Ontology - | mal cell    | experimen |    |       |       |
| Biological | differentia | tal       |    |       |       |
| Process    | tion        | (strong)  | 7  | 2.555 | 0.043 |
| Gene       |             |           |    |       |       |
| Ontology - |             | experimen |    |       |       |
| Biological | metal ion   | tal       |    |       |       |
| Process    | transport   | (strong)  | 10 | 4.491 | 0.043 |
| Gene       | muscle      |           |    |       |       |
| Ontology - | organ       | experimen |    |       |       |
| Biological | morphoge    | tal       |    |       |       |
| Process    | nesis       | (strong)  | 4  | 0.929 | 0.043 |
|            | negative    |           |    |       |       |
|            | regulation  |           |    |       |       |
| Gene       | of          |           |    |       |       |
| Ontology - | apoptotic   | experimen |    |       |       |
| Biological | signaling   | tal       |    |       |       |
| Process    | pathway     | (strong)  | 8  | 3.149 | 0.043 |



|                               |                                                         |                       |   |       |       |
|-------------------------------|---------------------------------------------------------|-----------------------|---|-------|-------|
| Gene                          | negative regulation of calcium ion                      |                       |   |       |       |
| Ontology - Biological Process | transport into cytosol                                  | experimental (strong) | 2 | 0.181 | 0.043 |
| Gene                          | negative regulation of transport                        | experimental (strong) | 9 | 3.794 | 0.043 |
| Gene                          | positive regulation of I-kappaB                         |                       |   |       |       |
| Ontology - Biological Process | kinase/NF-kappaB signaling                              | experimental (strong) | 6 | 1.962 | 0.043 |
| Gene                          | positive regulation of                                  |                       |   |       |       |
| Ontology - Biological Process | monocyte chemotaxis                                     | experimental (strong) | 2 | 0.181 | 0.043 |
| Gene                          | positive regulation of production of miRNAs involved in |                       |   |       |       |
| Ontology - Biological Process | gene silencing by miRNA                                 | experimental (strong) | 2 | 0.181 | 0.043 |
| Gene                          | positive regulation of translation                      | experimental (strong) | 4 | 0.929 | 0.043 |
| Gene                          | regulation of actin filament length                     | experimental (strong) | 4 | 0.929 | 0.043 |

|      |                                                        |                       |    |       |       |
|------|--------------------------------------------------------|-----------------------|----|-------|-------|
| Gene | regulation of actin polymerization or depolymerization | experimental (strong) | 4  | 0.929 | 0.043 |
| Gene | regulation of cell cycle                               | experimental (strong) | 17 | 9.731 | 0.043 |
| Gene | regulation of extracellular matrix disassembly         | experimental (strong) | 2  | 0.181 | 0.043 |
| Gene | replication fork processing                            | experimental (strong) | 2  | 0.181 | 0.043 |
| Gene | response to temperature stimulus                       | experimental (strong) | 6  | 1.962 | 0.043 |
| Gene | response to wounding                                   | experimental (strong) | 13 | 6.633 | 0.043 |
| Gene | sensory perception of mechanical stimulus              | experimental (strong) | 4  | 0.929 | 0.043 |
| Gene | sensory perception of temperature stimulus             | experimental (strong) | 2  | 0.181 | 0.043 |
| Gene | telencephalon development                              | experimental (strong) | 7  | 2.555 | 0.043 |
| Gene | actin filament-based process                           | experimental (any)    | 14 | 7.494 | 0.043 |

|            |                      |                                                  |                    |   |             |
|------------|----------------------|--------------------------------------------------|--------------------|---|-------------|
| Gene       | coronary vasculature |                                                  |                    |   |             |
| Ontology - | Biological Process   | morphogenesis                                    | experimental (any) | 2 | 0.213 0.043 |
| Gene       |                      |                                                  |                    |   |             |
| Ontology - | Biological Process   | detection of biotic stimulus                     | experimental (any) | 2 | 0.213 0.043 |
| Gene       |                      |                                                  |                    |   |             |
| Ontology - | Biological Process   | endothelial tube morphogenesis                   | experimental (any) | 2 | 0.213 0.043 |
| Gene       |                      |                                                  |                    |   |             |
| Ontology - | Biological Process   | mammary gland development                        | experimental (any) | 2 | 0.213 0.043 |
| Gene       |                      |                                                  |                    |   |             |
| Ontology - | Biological Process   | mammary gland development                        | experimental (any) | 2 | 0.213 0.043 |
| Gene       |                      |                                                  |                    |   |             |
| Ontology - | Biological Process   | myeloid dendritic cell differentiation           | experimental (any) | 2 | 0.213 0.043 |
| Gene       |                      |                                                  |                    |   |             |
| Ontology - | Biological Process   | negative regulation of phagocytosis              | experimental (any) | 2 | 0.213 0.043 |
| Gene       |                      |                                                  |                    |   |             |
| Ontology - | Biological Process   | positive regulation of Rho protein signaling     | experimental (any) | 2 | 0.213 0.043 |
| Gene       |                      |                                                  |                    |   |             |
| Ontology - | Biological Process   | positive regulation of histone H3-K4 methylation | experimental (any) | 2 | 0.213 0.043 |

|      |                                                   |                    |    |       |       |
|------|---------------------------------------------------|--------------------|----|-------|-------|
| Gene | positive regulation of neuroinflammatory response | experimental (any) | 2  | 0.213 | 0.043 |
| Gene | regulation of endopeptidase activity              | experimental (any) | 9  | 3.973 | 0.043 |
| Gene | regulation of organelle organization              | experimental (any) | 22 | 13.7  | 0.043 |
| Gene | regulation of tumor necrosis factor production    | experimental (any) | 5  | 1.528 | 0.043 |
| Gene | endocardial cushion development                   | experimental (any) | 3  | 0.571 | 0.044 |
| Gene | endodermal cell differentiation                   | experimental (any) | 3  | 0.571 | 0.044 |
| Gene | histone ubiquitination                            | experimental (any) | 3  | 0.571 | 0.044 |
| Gene | positive regulation of Notch signaling pathway    | experimental (any) | 3  | 0.571 | 0.044 |

|            |                                       |                       |    |       |       |
|------------|---------------------------------------|-----------------------|----|-------|-------|
| Gene       | positive regulation of cardiac muscle |                       |    |       |       |
| Ontology - | tissue                                |                       |    |       |       |
| Biological | development                           | experimental (any)    | 3  | 0.571 | 0.044 |
| Process    | experiment                            |                       |    |       |       |
| Gene       | production of miRNAs involved in      |                       |    |       |       |
| Ontology - | gene                                  |                       |    |       |       |
| Biological | silencing by miRNA                    | experimental (any)    | 3  | 0.571 | 0.044 |
| Process    | experiment                            |                       |    |       |       |
| Gene       | regulation of                         |                       |    |       |       |
| Ontology - | interleukin-10                        |                       |    |       |       |
| Biological | production                            | experimental (any)    | 3  | 0.571 | 0.044 |
| Process    | experiment                            |                       |    |       |       |
| Gene       | regulation of                         |                       |    |       |       |
| Ontology - | epithelial cell                       |                       |    |       |       |
| Biological | proliferation                         | experimental (strong) | 10 | 4.543 | 0.045 |
| Process    | experiment                            |                       |    |       |       |
| Gene       | cardiac                               |                       |    |       |       |
| Ontology - | ventricle                             |                       |    |       |       |
| Biological | development                           | experimental (any)    | 5  | 1.555 | 0.045 |
| Process    | experiment                            |                       |    |       |       |
| Gene       |                                       |                       |    |       |       |
| Ontology - | icosanoid                             |                       |    |       |       |
| Biological | metabolic                             | experimental (any)    | 4  | 1.036 | 0.045 |
| Process    | process                               |                       |    |       |       |
| Gene       | transforming growth factor            |                       |    |       |       |
| Ontology - | beta                                  |                       |    |       |       |
| Biological | receptor signaling                    | experimental (any)    | 6  | 2.126 | 0.045 |
| Process    | pathway                               |                       |    |       |       |

|                               |                                                      |                       |   |       |       |
|-------------------------------|------------------------------------------------------|-----------------------|---|-------|-------|
| Gene                          | vascular endothelial growth factor                   |                       |   |       |       |
| Ontology - Biological Process | receptor signaling pathway                           | experimental (any)    | 4 | 1.036 | 0.045 |
| Gene                          |                                                      |                       |   |       |       |
| Ontology - Biological Process | cell fate commitment                                 | experimental (strong) | 8 | 3.226 | 0.046 |
| Gene                          |                                                      |                       |   |       |       |
| Ontology - Biological Process | histone acetylation                                  | experimental (strong) | 5 | 1.445 | 0.046 |
| Gene                          |                                                      |                       |   |       |       |
| Ontology - Biological Process | mitotic cell cycle checkpoint                        | experimental (strong) | 5 | 1.445 | 0.046 |
| Gene                          |                                                      |                       |   |       |       |
| Ontology - Biological Process | negative regulation of locomotion                    | experimental (strong) | 8 | 3.226 | 0.046 |
| Gene                          |                                                      |                       |   |       |       |
| Ontology - Biological Process | positive regulation of actin filament polymerization | experimental (strong) | 3 | 0.516 | 0.046 |
| Gene                          |                                                      |                       |   |       |       |
| Ontology - Biological Process | programmed necrotic cell death                       | experimental (strong) | 3 | 0.516 | 0.046 |
| Gene                          |                                                      |                       |   |       |       |
| Ontology - Biological Process | response to dexamethasone                            | experimental (strong) | 3 | 0.516 | 0.046 |
| Gene                          |                                                      |                       |   |       |       |
| Ontology - Biological Process | BMP signaling pathway                                | experimental (any)    | 5 | 1.568 | 0.046 |

|                                    |                                                                                                                 |                    |   |       |       |
|------------------------------------|-----------------------------------------------------------------------------------------------------------------|--------------------|---|-------|-------|
| Gene Ontology - Biological Process | DNA damage response, signal transduction by p53 class mediator resulting in transcription of p21 class mediator | experimental (any) | 2 | 0.226 | 0.046 |
| Gene Ontology - Biological Process | I-kappaB phosphorylation                                                                                        | experimental (any) | 2 | 0.226 | 0.046 |
| Gene Ontology - Biological Process | cellular response to gonadotropin stimulus                                                                      | experimental (any) | 2 | 0.226 | 0.046 |
| Gene Ontology - Biological Process | digestive tract morphogenesis                                                                                   | experimental (any) | 3 | 0.585 | 0.046 |
| Gene Ontology - Biological Process | epithelial to mesenchymal transition involved in endocardial cushion formation                                  | experimental (any) | 2 | 0.226 | 0.046 |
| Gene Ontology - Biological Process | epithelial tube formation                                                                                       | experimental (any) | 5 | 1.568 | 0.046 |

|                                    |                                                           |                                               |                    |    |       |       |
|------------------------------------|-----------------------------------------------------------|-----------------------------------------------|--------------------|----|-------|-------|
| Gene Ontology - Biological Process | mature B cell differentiation involved in immune response | muscle structure development                  | experimental (any) | 2  | 0.226 | 0.046 |
| Gene Ontology - Biological Process | negative regulation of calcium ion transport into cytosol | negative regulation of tissue remodeling      | experimental (any) | 2  | 0.226 | 0.046 |
| Gene Ontology - Biological Process | negative regulation of histone deacetylation              | peptide transport                             | experimental (any) | 30 | 20.44 | 0.046 |
| Gene Ontology - Biological Process | positive regulation of lamellipodium assembly             | positive regulation of lamellipodium assembly | experimental (any) | 2  | 0.226 | 0.046 |



|      |                                                               |                       |     |       |       |
|------|---------------------------------------------------------------|-----------------------|-----|-------|-------|
| Gene | positive regulation of transcription of Notch receptor target | experimental (any)    | 2   | 0.226 | 0.046 |
| Gene | response to corticosterone                                    | experimental (any)    | 2   | 0.226 | 0.046 |
| Gene | positive regulation of transcription by RNA polymerase II     | predicted (union)     | 415 | 366.2 | 0.047 |
| Gene | cell migration involved in sprouting angiogenesis             | experimental (strong) | 4   | 0.955 | 0.047 |
| Gene | regulation of translation                                     | experimental (strong) | 7   | 2.607 | 0.047 |
| Gene | phosphatidylinositol 3-kinase signaling                       | experimental (any)    | 5   | 1.581 | 0.047 |
| Gene | protein complex oligomerization                               | experimental (any)    | 12  | 6.165 | 0.047 |
| Gene | protein localization to plasma membrane                       | experimental (any)    | 7   | 2.764 | 0.047 |

|                                                 |                                                 |                          |     |       |       |
|-------------------------------------------------|-------------------------------------------------|--------------------------|-----|-------|-------|
| Gene                                            |                                                 |                          |     |       |       |
| Ontology - regulation                           |                                                 |                          |     |       |       |
| Biological Process                              | of ion transport                                | experimental (any)       | 13  | 6.883 | 0.047 |
| Gene                                            | regulation                                      |                          |     |       |       |
| Ontology - of                                   |                                                 |                          |     |       |       |
| Biological Process                              | organelle assembly                              | experimental (any)       | 6   | 2.152 | 0.047 |
| Gene                                            | tumor                                           |                          |     |       |       |
| Ontology - necrosis                             |                                                 |                          |     |       |       |
| Biological Process                              | factor production                               | experimental (any)       | 5   | 1.581 | 0.047 |
| Gene                                            | cardiac muscle                                  |                          |     |       |       |
| Ontology - cell                                 |                                                 |                          |     |       |       |
| Biological Process                              | development                                     | predicted (intersection) | 22  | 10.74 | 0.048 |
| Gene                                            |                                                 |                          |     |       |       |
| Ontology - cell-cell                            |                                                 |                          |     |       |       |
| Biological Process                              | signaling                                       | predicted (intersection) | 287 | 240.7 | 0.048 |
| Gene                                            |                                                 |                          |     |       |       |
| Ontology - generation of                        |                                                 |                          |     |       |       |
| Biological Process                              | neurons                                         | predicted (intersection) | 267 | 222.2 | 0.048 |
| Gene                                            |                                                 |                          |     |       |       |
| Ontology - negative regulation of nucleic acid- |                                                 |                          |     |       |       |
| Biological Process                              | templated transcription                         | predicted (intersection) | 218 | 177.7 | 0.048 |
| Gene                                            |                                                 |                          |     |       |       |
| Ontology - response to peptide hormone          |                                                 |                          |     |       |       |
| Biological Process                              | transmembrane receptor protein serine/threonine | predicted (intersection) | 88  | 62.8  | 0.048 |
| Gene                                            |                                                 |                          |     |       |       |
| Ontology - kinase signaling pathway             |                                                 |                          |     |       |       |
| Biological Process                              |                                                 | predicted (intersection) | 72  | 49.56 | 0.048 |

|            |             |           |     |       |       |
|------------|-------------|-----------|-----|-------|-------|
| Gene       | regulation  |           |     |       |       |
| Ontology - | of          |           |     |       |       |
| Biological | neurogen    | predicted |     |       |       |
| Process    | esis        | (union)   | 304 | 262.4 | 0.048 |
| Gene       |             |           |     |       |       |
| Ontology - | gene        | experimen |     |       |       |
| Biological | expressio   | tal       |     |       |       |
| Process    | n           | (strong)  | 42  | 32.5  | 0.048 |
| Gene       | peptidyl-   |           |     |       |       |
| Ontology - | serine      | experimen |     |       |       |
| Biological | phosphory   | tal       |     |       |       |
| Process    | lation      | (strong)  | 8   | 3.252 | 0.048 |
| Gene       | actin       |           |     |       |       |
| Ontology - | filament    |           |     |       |       |
| Biological | bundle      | experimen |     |       |       |
| Process    | assembly    | tal (any) | 5   | 1.594 | 0.048 |
|            | anterior/p  |           |     |       |       |
| Gene       | osterior    |           |     |       |       |
| Ontology - | pattern     |           |     |       |       |
| Biological | specificati | experimen |     |       |       |
| Process    | on          | tal (any) | 6   | 2.166 | 0.048 |
| Gene       |             |           |     |       |       |
| Ontology - |             |           |     |       |       |
| Biological | phagocyto   | experimen |     |       |       |
| Process    | sis         | tal (any) | 7   | 2.777 | 0.048 |
|            | positive    |           |     |       |       |
|            | regulation  |           |     |       |       |
|            | of          |           |     |       |       |
|            | cysteine-   |           |     |       |       |
| Gene       | type        |           |     |       |       |
| Ontology - | endopepti   |           |     |       |       |
| Biological | dase        | experimen |     |       |       |
| Process    | activity    | tal (any) | 5   | 1.594 | 0.048 |
|            |             |           |     |       |       |
|            | pri-miRNA   |           |     |       |       |
|            | transcripti |           |     |       |       |
| Gene       | on by       |           |     |       |       |
| Ontology - | RNA         |           |     |       |       |
| Biological | polymeras   | experimen |     |       |       |
| Process    | e II        | tal (any) | 3   | 0.598 | 0.048 |
|            | protein     |           |     |       |       |
|            | modificati  |           |     |       |       |
| Gene       | on by       |           |     |       |       |
| Ontology - | small       |           |     |       |       |
| Biological | protein     | experimen |     |       |       |
| Process    | removal     | tal (any) | 8   | 3.415 | 0.048 |

|            |             |           |    |       |       |
|------------|-------------|-----------|----|-------|-------|
| Gene       | regulation  |           |    |       |       |
| Ontology - | of cellular |           |    |       |       |
| Biological | response    | experimen |    |       |       |
| Process    | to stress   | tal (any) | 15 | 8.424 | 0.048 |
| Gene       | regulation  |           |    |       |       |
| Ontology - | of          |           |    |       |       |
| Biological | hormone     | experimen |    |       |       |
| Process    | secretion   | tal (any) | 7  | 2.777 | 0.048 |
| Gene       |             |           |    |       |       |
| Ontology - | response    |           |    |       |       |
| Biological | to nutrient | experimen |    |       |       |
| Process    | levels      | tal (any) | 11 | 5.461 | 0.048 |
| Gene       |             |           |    |       |       |
| Ontology - | regulation  |           |    |       |       |
| Biological | of mRNA     | predicted |    |       |       |
| Process    | stability   | (union)   | 72 | 52.71 | 0.049 |
| Gene       | actin       |           |    |       |       |
| Ontology - | filament    | experimen |    |       |       |
| Biological | organizati  | tal       |    |       |       |
| Process    | on          | (strong)  | 7  | 2.633 | 0.049 |
| Gene       |             |           |    |       |       |
| Ontology - |             | experimen |    |       |       |
| Biological | response    | tal       |    |       |       |
| Process    | to alcohol  | (strong)  | 7  | 2.633 | 0.049 |
| Gene       |             |           |    |       |       |
| Ontology - | tube        | experimen |    |       |       |
| Biological | morphoge    | tal       |    |       |       |
| Process    | nesis       | (strong)  | 18 | 10.69 | 0.049 |
| Gene       |             |           |    |       |       |
| Ontology - | regulation  |           |    |       |       |
| Biological | of cellular |           |    |       |       |
| Process    | protein     | experimen |    |       |       |
| Process    | localizatio | tal (any) | 12 | 6.218 | 0.049 |
| Gene       |             |           |    |       |       |
| Ontology - | regulation  |           |    |       |       |
| Biological | of protein  | experimen |    |       |       |
| Process    | complex     | tal       |    |       |       |
| Process    | assembly    | (strong)  | 8  | 3.278 | 0.050 |
| Gene       |             |           |    |       |       |
| Ontology - | positive    |           |    |       |       |
| Biological | regulation  |           |    |       |       |
| Process    | of          |           |    |       |       |
| Gene       | supramole   |           |    |       |       |
| Ontology - | cular fiber |           |    |       |       |
| Biological | organizati  | experimen |    |       |       |
| Process    | on          | tal (any) | 6  | 2.192 | 0.050 |

|                                             |                                     |                                 |     |       |         |
|---------------------------------------------|-------------------------------------|---------------------------------|-----|-------|---------|
| Gene<br>Ontology -<br>Biological<br>Process | response<br>to glucose              | experimen<br>tal (any)          | 6   | 2.192 | 0.050   |
| Gene<br>Ontology -<br>Biological<br>Process | roof of<br>mouth<br>developm<br>ent | experimen<br>tal (any)          | 4   | 1.076 | 0.050   |
| Gene<br>Ontology -<br>Cellular<br>Component | chromoso<br>me                      | predicted<br>(union)            | 950 | 805.9 | 3.10e-9 |
| Gene<br>Ontology -<br>Cellular<br>Component | nuclear<br>lumen                    | predicted<br>(intersecti<br>on) | 920 | 773.2 | 1.09e-8 |
| Gene<br>Ontology -<br>Cellular<br>Component | nuclear<br>chromatin                | predicted<br>(union)            | 732 | 613   | 4.01e-8 |
| Gene<br>Ontology -<br>Cellular<br>Component | nuclear<br>chromoso<br>me           | predicted<br>(union)            | 788 | 666.1 | 4.46e-8 |
| Gene<br>Ontology -<br>Cellular<br>Component | chromatin                           | predicted<br>(union)            | 775 | 659.5 | 2.25e-7 |
| Gene<br>Ontology -<br>Cellular<br>Component | Golgi<br>apparatus                  | predicted<br>(union)            | 590 | 506   | 8.37e-5 |
| Gene<br>Ontology -<br>Cellular<br>Component | nuclear<br>chromatin                | predicted<br>(intersecti<br>on) | 354 | 280.9 | 8.49e-5 |
| Gene<br>Ontology -<br>Cellular<br>Component | nuclear<br>chromoso<br>me           | predicted<br>(intersecti<br>on) | 381 | 305.3 | 8.49e-5 |

|                                             |                               |                             |     |       |         |
|---------------------------------------------|-------------------------------|-----------------------------|-----|-------|---------|
| Gene<br>Ontology -<br>Cellular<br>Component | nucleoplasm                   | predicted<br>(intersection) | 640 | 543.9 | 8.49e-5 |
| Gene<br>Ontology -<br>Cellular<br>Component | synapse                       | predicted<br>(intersection) | 240 | 182.3 | 2.04e-4 |
| Gene<br>Ontology -<br>Cellular<br>Component | chromosome                    | predicted<br>(intersection) | 445 | 369.3 | 3.48e-4 |
| Gene<br>Ontology -<br>Cellular<br>Component | chromatin                     | predicted<br>(intersection) | 370 | 302.2 | 5.09e-4 |
| Gene<br>Ontology -<br>Cellular<br>Component | synapse                       | predicted<br>(union)        | 464 | 397.9 | 0.001   |
| Gene<br>Ontology -<br>Cellular<br>Component | protein-containing<br>complex | experimental<br>(strong)    | 42  | 23.98 | 0.001   |
| Gene<br>Ontology -<br>Cellular<br>Component | axon                          | predicted<br>(intersection) | 119 | 83.74 | 0.002   |
| Gene<br>Ontology -<br>Cellular<br>Component | cell<br>junction              | predicted<br>(intersection) | 246 | 194.5 | 0.002   |
| Gene<br>Ontology -<br>Cellular<br>Component | cytosol                       | predicted<br>(intersection) | 878 | 788.5 | 0.002   |

|            |                       |                       |     |       |       |
|------------|-----------------------|-----------------------|-----|-------|-------|
| Gene       |                       |                       |     |       |       |
| Ontology - |                       |                       |     |       |       |
| Cellular   | cell                  | predicted             |     |       |       |
| Component  | leading edge          | (intersection)        | 90  | 60.66 | 0.003 |
| Gene       | CD95                  |                       |     |       |       |
| Ontology - | death-                |                       |     |       |       |
| Cellular   | inducing              |                       |     |       |       |
| Component  | signaling complex     | experimental (any)    | 3   | 0.080 | 0.003 |
| Gene       |                       |                       |     |       |       |
| Ontology - |                       |                       |     |       |       |
| Cellular   |                       |                       |     |       |       |
| Component  | cytoplasmic vesicle   | experimental (any)    | 44  | 24.29 | 0.003 |
| Gene       |                       |                       |     |       |       |
| Ontology - |                       |                       |     |       |       |
| Cellular   | endomem               |                       |     |       |       |
| Component  | brane system          | experimental (any)    | 74  | 47.09 | 0.003 |
| Gene       |                       |                       |     |       |       |
| Ontology - |                       |                       |     |       |       |
| Cellular   |                       |                       |     |       |       |
| Component  | intracellular vesicle | experimental (any)    | 44  | 24.33 | 0.003 |
| Gene       |                       |                       |     |       |       |
| Ontology - |                       |                       |     |       |       |
| Cellular   |                       | predicted             |     |       |       |
| Component  | presynapse            | (intersection)        | 111 | 79.09 | 0.004 |
| Gene       | CD95                  |                       |     |       |       |
| Ontology - | death-                |                       |     |       |       |
| Cellular   | inducing              |                       |     |       |       |
| Component  | signaling complex     | experimental (strong) | 3   | 0.103 | 0.005 |
| Gene       |                       |                       |     |       |       |
| Ontology - |                       |                       |     |       |       |
| Cellular   |                       |                       |     |       |       |
| Component  | cell surface          | experimental (any)    | 19  | 7.255 | 0.005 |
| Gene       |                       |                       |     |       |       |
| Ontology - | death-                |                       |     |       |       |
| Cellular   | inducing              |                       |     |       |       |
| Component  | signaling complex     | experimental (any)    | 3   | 0.106 | 0.005 |

|                                             |                      |                             |     |       |       |
|---------------------------------------------|----------------------|-----------------------------|-----|-------|-------|
| Gene<br>Ontology -<br>Cellular<br>Component | RISC<br>complex      | predicted<br>(intersection) | 7   | 1.61  | 0.007 |
| Gene<br>Ontology -<br>Cellular<br>Component | neuron<br>projection | predicted<br>(intersection) | 216 | 172.7 | 0.007 |
| Gene<br>Ontology -<br>Cellular<br>Component | Golgi<br>membrane    | predicted<br>(union)        | 292 | 244.8 | 0.007 |
| Gene<br>Ontology -<br>Cellular<br>Component | endosome             | experimental (any)          | 22  | 9.726 | 0.007 |
| Gene<br>Ontology -<br>Cellular<br>Component | receptor<br>complex  | experimental (any)          | 11  | 3.083 | 0.007 |
| Gene<br>Ontology -<br>Cellular<br>Component | vesicle              | experimental (any)          | 61  | 40.29 | 0.007 |
| Gene<br>Ontology -<br>Cellular<br>Component | Golgi<br>apparatus   | predicted<br>(intersection) | 280 | 231.9 | 0.009 |
| Gene<br>Ontology -<br>Cellular<br>Component | ruffle<br>membrane   | predicted<br>(intersection) | 25  | 12.35 | 0.009 |
| Gene<br>Ontology -<br>Cellular<br>Component | axon                 | predicted<br>(union)        | 222 | 182.7 | 0.010 |



|                                |                      |                                 |     |       |       |  |
|--------------------------------|----------------------|---------------------------------|-----|-------|-------|--|
| Gene<br>Ontology -<br>Cellular | cell                 |                                 |     |       |       |  |
| Component                      | leading<br>edge      | predicted<br>(union)            | 166 | 132.4 | 0.010 |  |
| Gene<br>Ontology -<br>Cellular |                      |                                 |     |       |       |  |
| Component                      | neuron<br>projection | predicted<br>(union)            | 432 | 376.8 | 0.010 |  |
| Gene<br>Ontology -<br>Cellular |                      |                                 |     |       |       |  |
| Component                      | receptor<br>complex  | experimen<br>tal<br>(strong)    | 10  | 2.607 | 0.010 |  |
| Gene<br>Ontology -<br>Cellular | activin<br>responsiv |                                 |     |       |       |  |
| Component                      | e factor<br>complex  | experimen<br>tal (any)          | 2   | 0.040 | 0.011 |  |
| Gene<br>Ontology -<br>Cellular | death-<br>inducing   |                                 |     |       |       |  |
| Component                      | signaling<br>complex | experimen<br>tal<br>(strong)    | 3   | 0.155 | 0.012 |  |
| Gene<br>Ontology -<br>Cellular |                      |                                 |     |       |       |  |
| Component                      | ruffle               | predicted<br>(intersecti<br>on) | 42  | 25.23 | 0.014 |  |
| Gene<br>Ontology -<br>Cellular |                      |                                 |     |       |       |  |
| Component                      | cell<br>surface      | experimen<br>tal<br>(strong)    | 15  | 5.833 | 0.014 |  |
| Gene<br>Ontology -<br>Cellular |                      |                                 |     |       |       |  |
| Component                      | cytoplasm            | experimen<br>tal (any)          | 141 | 119.1 | 0.015 |  |
| Gene<br>Ontology -<br>Cellular | activin<br>responsiv |                                 |     |       |       |  |
| Component                      | e factor<br>complex  | experimen<br>tal<br>(strong)    | 2   | 0.052 | 0.017 |  |

|                                    |                                         |                          |     |       |       |
|------------------------------------|-----------------------------------------|--------------------------|-----|-------|-------|
| Gene Ontology - Cellular Component | cytosol                                 | experimental (any)       | 77  | 56.51 | 0.019 |
| Gene Ontology - Cellular Component | plasma membrane bounded cell projection | predicted (intersection) | 341 | 291.7 | 0.020 |
| Gene Ontology - Cellular Component | extracellular region                    | experimental (any)       | 58  | 39.99 | 0.023 |
| Gene Ontology - Cellular Component | endomembrane system                     | predicted (intersection) | 737 | 670.5 | 0.026 |
| Gene Ontology - Cellular Component | perinuclear region of cytoplasm         | predicted (intersection) | 145 | 113.6 | 0.026 |
| Gene Ontology - Cellular Component | somatodendritic compartment             | predicted (intersection) | 147 | 115.6 | 0.026 |
| Gene Ontology - Cellular Component | synaptic complex                        | experimental (any)       | 3   | 0.239 | 0.026 |
| Gene Ontology - Cellular Component | cell projection                         | predicted (intersection) | 349 | 301.7 | 0.028 |
| Gene Ontology - Cellular Component | early endosome                          | predicted (intersection) | 74  | 52.61 | 0.028 |

|                                             |                                          |                             |     |       |       |
|---------------------------------------------|------------------------------------------|-----------------------------|-----|-------|-------|
| Gene<br>Ontology -<br>Cellular<br>Component | glutamate<br>ergic<br>synapse            | predicted<br>(intersection) | 79  | 56.72 | 0.028 |
| Gene<br>Ontology -<br>Cellular<br>Component | distal<br>axon                           | predicted<br>(intersection) | 61  | 41.87 | 0.029 |
| Gene<br>Ontology -<br>Cellular<br>Component | cell<br>junction                         | predicted<br>(union)        | 477 | 424.4 | 0.034 |
| Gene<br>Ontology -<br>Cellular<br>Component | early<br>endosome                        | predicted<br>(union)        | 143 | 114.8 | 0.034 |
| Gene<br>Ontology -<br>Cellular<br>Component | ruffle<br>membrane                       | predicted<br>(union)        | 41  | 26.94 | 0.034 |
| Gene<br>Ontology -<br>Cellular<br>Component | pyruvate<br>dehydrog<br>enase<br>complex | predicted<br>(union)        | 8   | 3.124 | 0.035 |
| Gene<br>Ontology -<br>Cellular<br>Component | SMAD<br>protein<br>complex               | experimen<br>tal (any)      | 2   | 0.093 | 0.035 |
| Gene<br>Ontology -<br>Cellular<br>Component | cell<br>projection<br>membrane           | experimen<br>tal (any)      | 10  | 3.455 | 0.035 |
| Gene<br>Ontology -<br>Cellular<br>Component | female<br>pronucleu<br>s                 | experimen<br>tal (any)      | 2   | 0.093 | 0.035 |

|                                             |                              |                              |    |       |       |
|---------------------------------------------|------------------------------|------------------------------|----|-------|-------|
| Gene<br>Ontology -<br>Cellular<br>Component | lateral<br>element           | experimen<br>tal (any)       | 2  | 0.093 | 0.035 |
| Gene<br>Ontology -<br>Cellular<br>Component | nucleopla<br>sm              | experimen<br>tal (any)       | 58 | 41.1  | 0.035 |
| Gene<br>Ontology -<br>Cellular<br>Component | nucleus                      | experimen<br>tal (any)       | 97 | 77.92 | 0.035 |
| Gene<br>Ontology -<br>Cellular<br>Component | secretory<br>granule         | experimen<br>tal (any)       | 18 | 8.743 | 0.035 |
| Gene<br>Ontology -<br>Cellular<br>Component | secretory<br>vesicle         | experimen<br>tal (any)       | 20 | 10.08 | 0.035 |
| Gene<br>Ontology -<br>Cellular<br>Component | vesicle<br>lumen             | experimen<br>tal (any)       | 10 | 3.694 | 0.039 |
| Gene<br>Ontology -<br>Cellular<br>Component | endoplas<br>mic<br>reticulum | experimen<br>tal (any)       | 32 | 19.88 | 0.042 |
| Gene<br>Ontology -<br>Cellular<br>Component | lateral<br>element           | experimen<br>tal<br>(strong) | 2  | 0.077 | 0.043 |
| Gene<br>Ontology -<br>Cellular<br>Component | extracellul<br>ar region     | experimen<br>tal<br>(strong) | 31 | 19.67 | 0.047 |

|                                    |                                                                                   |                          |     |       |         |
|------------------------------------|-----------------------------------------------------------------------------------|--------------------------|-----|-------|---------|
| Gene Ontology - Cellular Component | cyclin-dependent protein kinase holoenzyme complex                                | experimental (any)       | 3   | 0.359 | 0.047   |
| Gene Ontology - Cellular Component | adherens junction                                                                 | predicted (intersection) | 100 | 76.22 | 0.049   |
| Gene Ontology - Cellular Component | cell                                                                              | experimental (any)       | 180 | 167.2 | 0.049   |
| Gene Ontology - Cellular Component | ficolin-1-rich granule membrane                                                   | experimental (any)       | 4   | 0.731 | 0.050   |
| Gene Ontology - Molecular Function | DNA binding                                                                       | predicted (union)        | 907 | 763   | 1.69e-9 |
| Gene Ontology - Molecular Function | DNA-binding transcription factor activity, RNA polymerase II-specific DNA-binding | predicted (union)        | 675 | 556.4 | 1.20e-8 |
| Gene Ontology - Molecular Function | transcription factor activity                                                     | predicted (union)        | 825 | 695.4 | 1.24e-8 |
| Gene Ontology - Molecular Function | nucleic acid binding                                                              | predicted (intersection) | 699 | 575.3 | 3.28e-7 |
| Gene Ontology - Molecular Function | DNA binding                                                                       | predicted (intersection) | 443 | 349.6 | 3.55e-6 |

|                               |                                                               |                          |     |       |         |
|-------------------------------|---------------------------------------------------------------|--------------------------|-----|-------|---------|
| Gene                          | DNA-binding transcription factor activity, RNA                |                          |     |       |         |
| Ontology - Molecular Function | polymerase II-specific                                        | predicted (intersection) | 334 | 255   | 6.70e-6 |
| Gene                          |                                                               |                          |     |       |         |
| Ontology - Molecular Function | metal ion binding                                             | predicted (intersection) | 752 | 642.2 | 1.62e-5 |
| Gene                          |                                                               |                          |     |       |         |
| Ontology - Molecular Function | phosphatase activity                                          | predicted (union)        | 183 | 134.7 | 2.81e-5 |
| Gene                          | transcription                                                 |                          |     |       |         |
| Ontology - Molecular Function | coregulator activity                                          | predicted (union)        | 234 | 179.2 | 3.05e-5 |
| Gene                          |                                                               |                          |     |       |         |
| Ontology - Molecular Function | cation binding                                                | predicted (intersection) | 757 | 651.5 | 4.44e-5 |
| Gene                          | DNA-binding                                                   |                          |     |       |         |
| Ontology - Molecular Function | transcription factor activity                                 | predicted (intersection) | 397 | 318.7 | 5.98e-5 |
| Gene                          | phosphoric ester                                              |                          |     |       |         |
| Ontology - Molecular Function | hydrolase activity                                            | predicted (union)        | 232 | 179.2 | 6.94e-5 |
| Gene                          | transcription                                                 |                          |     |       |         |
| Ontology - Molecular Function | coactivator activity                                          | predicted (union)        | 145 | 105.4 | 1.21e-4 |
| Gene                          |                                                               |                          |     |       |         |
| Ontology - Molecular Function | transcription regulatory region sequence-specific DNA binding | predicted (union)        | 282 | 224.9 | 1.21e-4 |

|            |                                                  |           |     |       |         |
|------------|--------------------------------------------------|-----------|-----|-------|---------|
|            | transcripti<br>on                                |           |     |       |         |
| Gene       | regulatory                                       |           |     |       |         |
| Ontology - | region                                           |           |     |       |         |
| Molecular  | DNA                                              | predicted |     |       |         |
| Function   | binding                                          | (union)   | 324 | 263.9 | 1.78e-4 |
| Gene       | double-                                          |           |     |       |         |
| Ontology - | stranded                                         |           |     |       |         |
| Molecular  | DNA                                              | predicted |     |       |         |
| Function   | binding                                          | (union)   | 320 | 260.8 | 1.81e-4 |
|            | proximal<br>promoter<br>sequence-                |           |     |       |         |
| Gene       | specific                                         |           |     |       |         |
| Ontology - |                                                  |           |     |       |         |
| Molecular  | DNA                                              | predicted |     |       |         |
| Function   | binding                                          | (union)   | 203 | 156.6 | 1.81e-4 |
|            | sequence-<br>specific<br>double-                 |           |     |       |         |
| Gene       | stranded                                         |           |     |       |         |
| Ontology - |                                                  |           |     |       |         |
| Molecular  | DNA                                              | predicted |     |       |         |
| Function   | binding                                          | (union)   | 293 | 237   | 2.08e-4 |
|            | RNA<br>polymeras<br>e II<br>regulatory<br>region |           |     |       |         |
| Gene       | sequence-                                        |           |     |       |         |
| Ontology - | specific                                         |           |     |       |         |
| Molecular  | DNA                                              | predicted |     |       |         |
| Function   | binding                                          | (union)   | 261 | 208.5 | 2.09e-4 |
|            | RNA<br>polymeras<br>e II<br>regulatory           |           |     |       |         |
| Gene       | region                                           |           |     |       |         |
| Ontology - |                                                  |           |     |       |         |
| Molecular  | DNA                                              | predicted |     |       |         |
| Function   | binding                                          | (union)   | 261 | 208.9 | 2.34e-4 |

|                               |                                                       |                   |     |       |         |
|-------------------------------|-------------------------------------------------------|-------------------|-----|-------|---------|
| Gene                          | RNA polymerase II proximal promoter sequence-specific |                   |     |       |         |
| Molecular Function            | DNA binding                                           | predicted (union) | 195 | 150.7 | 2.54e-4 |
| Gene                          |                                                       |                   |     |       |         |
| Ontology - Molecular Function | purine nucleotide binding                             | predicted (union) | 708 | 628.2 | 0.001   |
| Gene                          |                                                       |                   |     |       |         |
| Ontology - Molecular Function | purine ribonucleoside triphosphate binding            | predicted (union) | 678 | 600.9 | 0.001   |
| Gene                          |                                                       |                   |     |       |         |
| Ontology - Molecular Function | purine ribonucleotide binding                         | predicted (union) | 705 | 625.9 | 0.001   |
| Gene                          |                                                       |                   |     |       |         |
| Ontology - Molecular Function | RNA binding                                           | predicted (union) | 595 | 525.6 | 0.002   |
| Gene                          |                                                       |                   |     |       |         |
| Ontology - Molecular Function | guanylate binding                                     | predicted (union) | 158 | 122.6 | 0.002   |
| Gene                          |                                                       |                   |     |       |         |
| Ontology - Molecular Function | nucleoside binding                                    | predicted (union) | 157 | 122.2 | 0.002   |
| Gene                          |                                                       |                   |     |       |         |
| Ontology - Molecular Function | nucleotide binding                                    | predicted (union) | 778 | 700.1 | 0.002   |
| Gene                          |                                                       |                   |     |       |         |
| Ontology - Molecular Function | protein specific binding                              | predicted (union) | 281 | 231.9 | 0.002   |
| Gene                          |                                                       |                   |     |       |         |
| Ontology - Molecular Function | purine nucleoside binding                             | predicted (union) | 154 | 119.5 | 0.002   |



|            |             |             |     |       |       |
|------------|-------------|-------------|-----|-------|-------|
| Gene       |             |             |     |       |       |
| Ontology - | ribonucleo  |             |     |       |       |
| Molecular  | side        | predicted   |     |       |       |
| Function   | binding     | (union)     | 155 | 119.5 | 0.002 |
| Gene       | sequence-   |             |     |       |       |
| Ontology - | specific    |             |     |       |       |
| Molecular  | DNA         | predicted   |     |       |       |
| Function   | binding     | (union)     | 376 | 320.6 | 0.002 |
| Gene       |             |             |     |       |       |
| Ontology - |             |             |     |       |       |
| Molecular  | GTP         | predicted   |     |       |       |
| Function   | binding     | (union)     | 145 | 112.1 | 0.003 |
| Gene       |             |             |     |       |       |
| Ontology - | cytokine    | experimen   |     |       |       |
| Molecular  | receptor    | tal         |     |       |       |
| Function   | binding     | (strong)    | 11  | 2.4   | 0.003 |
|            | DNA-        |             |     |       |       |
|            | binding     |             |     |       |       |
|            | transcripti |             |     |       |       |
|            | on          |             |     |       |       |
|            | activator   |             |     |       |       |
|            | activity,   |             |     |       |       |
| Gene       | RNA         |             |     |       |       |
| Ontology - | polymeras   |             |     |       |       |
| Molecular  | e II-       | predicted   |     |       |       |
| Function   | specific    | (union)     | 174 | 138.6 | 0.004 |
| Gene       | carbohydr   |             |     |       |       |
| Ontology - | ate         |             |     |       |       |
| Molecular  | derivative  | predicted   |     |       |       |
| Function   | binding     | (union)     | 805 | 730.2 | 0.005 |
| Gene       |             |             |     |       |       |
| Ontology - | cytokine    |             |     |       |       |
| Molecular  | receptor    | experimen   |     |       |       |
| Function   | binding     | tal (any)   | 11  | 2.339 | 0.006 |
| Gene       | protein     |             |     |       |       |
| Ontology - | domain      | predicted   |     |       |       |
| Molecular  | specific    | (intersecti |     |       |       |
| Function   | binding     | on)         | 144 | 106.3 | 0.007 |
| Gene       |             |             |     |       |       |
| Ontology - | magnesi     |             |     |       |       |
| Molecular  | m ion       | predicted   |     |       |       |
| Function   | binding     | (union)     | 98  | 73.02 | 0.007 |
| Gene       |             |             |     |       |       |
| Ontology - |             |             |     |       |       |
| Molecular  | enzyme      | predicted   |     |       |       |
| Function   | binding     | (union)     | 742 | 672   | 0.008 |

|            |                                           |                       |     |       |       |
|------------|-------------------------------------------|-----------------------|-----|-------|-------|
| Gene       | phosphoprotein                            |                       |     |       |       |
| Ontology - | phosphatase activity (union)              | predicted             | 115 | 88.24 | 0.009 |
| Gene       | kinase activity                           | experimental (any)    | 13  | 3.867 | 0.009 |
| Ontology - | MAPK activity                             | experimental (any)    | 4   | 0.266 | 0.009 |
| Gene       | Rho GDP-dissociation inhibitor binding    | experimental (any)    | 2   | 0.027 | 0.009 |
| Ontology - | cytokine activity                         | experimental (any)    | 8   | 1.608 | 0.009 |
| Gene       | protein specific binding                  | experimental (any)    | 20  | 8.092 | 0.009 |
| Ontology - | hydrolase activity, acting on ester bonds | predicted (union)     | 349 | 303.4 | 0.017 |
| Gene       | GDP-dissociation inhibitor binding        | experimental (strong) | 2   | 0.052 | 0.018 |
| Ontology - | MAPK activity                             | experimental (strong) | 4   | 0.387 | 0.018 |
| Gene       | Rho GDP-dissociation inhibitor binding    | experimental (strong) | 2   | 0.052 | 0.018 |

|            |             |             |     |       |       |
|------------|-------------|-------------|-----|-------|-------|
| Gene       |             |             |     |       |       |
| Ontology - | chemokine   | experimen   |     |       |       |
| Molecular  | e receptor  | tal         |     |       |       |
| Function   | binding     | (strong)    | 4   | 0.413 | 0.018 |
| Gene       |             |             |     |       |       |
| Ontology - |             | experimen   |     |       |       |
| Molecular  | cytokine    | tal         |     |       |       |
| Function   | activity    | (strong)    | 7   | 1.549 | 0.018 |
| Gene       |             |             |     |       |       |
| Ontology - | signaling   | experimen   |     |       |       |
| Molecular  | receptor    | tal         |     |       |       |
| Function   | activity    | (strong)    | 21  | 9.886 | 0.018 |
|            | tumor       |             |     |       |       |
| Gene       | necrosis    |             |     |       |       |
| Ontology - | factor      | experimen   |     |       |       |
| Molecular  | receptor    | tal         |     |       |       |
| Function   | binding     | (strong)    | 4   | 0.439 | 0.018 |
| Gene       | GDP-        |             |     |       |       |
| Ontology - | dissociatio |             |     |       |       |
| Molecular  | n inhibitor | experimen   |     |       |       |
| Function   | binding     | tal (any)   | 2   | 0.040 | 0.018 |
|            | protein     |             |     |       |       |
| Gene       | serine/thr  |             |     |       |       |
| Ontology - | reonine     |             |     |       |       |
| Molecular  | kinase      | experimen   |     |       |       |
| Function   | activity    | tal (any)   | 20  | 8.902 | 0.018 |
|            | tumor       |             |     |       |       |
| Gene       | necrosis    |             |     |       |       |
| Ontology - | factor      |             |     |       |       |
| Molecular  | receptor    | experimen   |     |       |       |
| Function   | binding     | tal (any)   | 4   | 0.385 | 0.018 |
|            | cysteine-   |             |     |       |       |
|            | type        |             |     |       |       |
|            | endopepti   |             |     |       |       |
|            | dase        |             |     |       |       |
| Gene       | activity    |             |     |       |       |
| Ontology - | involved in |             |     |       |       |
| Molecular  | apoptotic   | experimen   |     |       |       |
| Function   | process     | tal (any)   | 9   | 2.458 | 0.019 |
| Gene       |             |             |     |       |       |
| Ontology - | protein     |             |     |       |       |
| Molecular  | kinase      | experimen   |     |       |       |
| Function   | activity    | tal (any)   | 25  | 12.56 | 0.019 |
| Gene       | phosphori   |             |     |       |       |
| Ontology - | c ester     | predicted   |     |       |       |
| Molecular  | hydrolase   | (intersecti |     |       |       |
| Function   | activity    | on)         | 113 | 82.13 | 0.020 |

|                                      |                                     |                       |    |       |       |
|--------------------------------------|-------------------------------------|-----------------------|----|-------|-------|
| Gene                                 |                                     |                       |    |       |       |
| Ontology - signaling                 |                                     |                       |    |       |       |
| Molecular Function                   | receptor activity                   | experimental (any)    | 28 | 14.92 | 0.020 |
| Gene                                 | lipopolysaccharide                  |                       |    |       |       |
| Ontology -                           |                                     |                       |    |       |       |
| Molecular Function                   | receptor activity                   | experimental (any)    | 2  | 0.053 | 0.021 |
| Gene                                 | cysteine-type                       |                       |    |       |       |
| Ontology - endopeptidase             |                                     |                       |    |       |       |
| Molecular Function                   | dase activity                       | experimental (any)    | 10 | 3.189 | 0.025 |
| Gene                                 |                                     |                       |    |       |       |
| Ontology - exogenous protein binding |                                     |                       |    |       |       |
| Molecular Function                   | s protein binding                   | experimental (any)    | 5  | 0.877 | 0.025 |
| Gene                                 | mannosyl-oligosaccharide 1,2-alpha- |                       |    |       |       |
| Ontology - mannosidase               |                                     |                       |    |       |       |
| Molecular Function                   | ase activity                        | experimental (any)    | 2  | 0.066 | 0.025 |
| Gene                                 | prostaglandin                       |                       |    |       |       |
| Ontology -                           |                                     |                       |    |       |       |
| Molecular Function                   | synthase activity                   | experimental (any)    | 2  | 0.066 | 0.025 |
| Gene                                 |                                     |                       |    |       |       |
| Ontology - signaling                 |                                     |                       |    |       |       |
| Molecular Function                   | receptor binding                    | experimental (any)    | 28 | 15.41 | 0.025 |
| Gene                                 |                                     |                       |    |       |       |
| Ontology - virus                     |                                     |                       |    |       |       |
| Molecular Function                   | receptor activity                   | experimental (any)    | 5  | 0.864 | 0.025 |
| Gene                                 |                                     |                       |    |       |       |
| Ontology - chemokine                 |                                     |                       |    |       |       |
| Molecular Function                   | chemokine activity                  | experimental (strong) | 3  | 0.232 | 0.026 |
| Gene                                 |                                     |                       |    |       |       |
| Ontology - chemokine receptor        |                                     |                       |    |       |       |
| Molecular Function                   | e receptor binding                  | experimental (any)    | 4  | 0.545 | 0.026 |

|                               |                               |                       |     |       |       |
|-------------------------------|-------------------------------|-----------------------|-----|-------|-------|
| Gene                          |                               |                       |     |       |       |
| Ontology - identical          |                               |                       |     |       |       |
| Molecular Function            | protein binding               | experimental (any)    | 32  | 18.96 | 0.026 |
|                               | tumor necrosis factor         |                       |     |       |       |
| Gene                          |                               |                       |     |       |       |
| Ontology - receptor           |                               |                       |     |       |       |
| Molecular Function            | superfamily binding           | experimental (any)    | 4   | 0.545 | 0.026 |
| Gene                          |                               |                       |     |       |       |
| Ontology - interleukin-       |                               |                       |     |       |       |
| Molecular Function            | 1 receptor activity           | experimental (any)    | 2   | 0.080 | 0.028 |
|                               | phosphotransferase activity,  |                       |     |       |       |
| Gene                          |                               |                       |     |       |       |
| Ontology - alcohol            |                               |                       |     |       |       |
| Molecular Function            | group acceptor                | experimental (any)    | 25  | 13.74 | 0.028 |
| Gene                          |                               |                       |     |       |       |
| Ontology - small              |                               |                       |     |       |       |
| Molecular Function            | molecule binding              | predicted (union)     | 882 | 814.1 | 0.029 |
| Gene                          |                               |                       |     |       |       |
| Ontology - lipopolysaccharide |                               |                       |     |       |       |
| Molecular Function            | receptor activity             | experimental (strong) | 2   | 0.077 | 0.030 |
| Gene                          |                               |                       |     |       |       |
| Ontology - pattern            |                               |                       |     |       |       |
| Molecular Function            | recognition receptor activity | experimental (strong) | 2   | 0.077 | 0.030 |
|                               | signaling                     |                       |     |       |       |
| Gene                          |                               |                       |     |       |       |
| Ontology - pattern            |                               |                       |     |       |       |
| Molecular Function            | recognition receptor activity | experimental (strong) | 2   | 0.077 | 0.030 |
|                               | tumor necrosis factor         |                       |     |       |       |
| Gene                          |                               |                       |     |       |       |
| Ontology - receptor           |                               |                       |     |       |       |
| Molecular Function            | superfamily binding           | experimental (strong) | 4   | 0.568 | 0.030 |

|                    |                      |                          |     |       |       |
|--------------------|----------------------|--------------------------|-----|-------|-------|
| Gene               |                      |                          |     |       |       |
| Ontology -         |                      |                          |     |       |       |
| Molecular Function | chromatin binding    | predicted (union)        | 186 | 155   | 0.034 |
| Gene               |                      |                          |     |       |       |
| Ontology -         | cytoskeletal protein | predicted (union)        | 312 | 271.4 | 0.034 |
| Molecular Function | binding              |                          |     |       |       |
| Gene               |                      |                          |     |       |       |
| Ontology -         | kinase               | predicted (union)        | 265 | 227.6 | 0.034 |
| Molecular Function | binding              |                          |     |       |       |
| Gene               | CCR5                 |                          |     |       |       |
| Ontology -         | chemokine receptor   | experimental (any)       | 2   | 0.093 | 0.034 |
| Molecular Function | binding              |                          |     |       |       |
| Gene               |                      |                          |     |       |       |
| Ontology -         | R-SMAD               | experimental (any)       | 3   | 0.306 | 0.034 |
| Molecular Function | binding              |                          |     |       |       |
| Gene               | ubiquitin-like       |                          |     |       |       |
| Ontology -         | protein              |                          |     |       |       |
| Molecular Function | ligase binding       | experimental (any)       | 10  | 3.627 | 0.034 |
| Gene               |                      |                          |     |       |       |
| Ontology -         | identical protein    | experimental (strong)    | 22  | 12.36 | 0.043 |
| Molecular Function | binding              |                          |     |       |       |
| Gene               |                      |                          |     |       |       |
| Ontology -         | chemokine            | experimental (any)       | 3   | 0.345 | 0.044 |
| Molecular Function | activity             |                          |     |       |       |
| Gene               |                      |                          |     |       |       |
| Ontology -         | SH3 domain           | predicted (intersection) | 33  | 18.79 | 0.045 |
| Molecular Function | binding              |                          |     |       |       |
| Gene               | carbohydrate         |                          |     |       |       |
| Ontology -         | derivative           | predicted (intersection) | 388 | 334.6 | 0.045 |
| Molecular Function | binding              |                          |     |       |       |
| Gene               | transcription        |                          |     |       |       |
| Ontology -         | coregulator          | predicted (intersection) | 110 | 82.13 | 0.045 |
| Molecular Function | activity             |                          |     |       |       |

|            |             |             |     |       |       |
|------------|-------------|-------------|-----|-------|-------|
| Gene       |             |             |     |       |       |
| Ontology - | predicted   |             |     |       |       |
| Molecular  | transferas  | (intersecti |     |       |       |
| Function   | e activity  | on)         | 471 | 412.4 | 0.045 |
| Gene       |             |             |     |       |       |
| Ontology - | transition  | predicted   |     |       |       |
| Molecular  | metal ion   | (intersecti |     |       |       |
| Function   | binding     | on)         | 205 | 166.6 | 0.045 |
| Gene       | CXCR        |             |     |       |       |
| Ontology - | chemokin    |             |     |       |       |
| Molecular  | e receptor  | experimen   |     |       |       |
| Function   | binding     | tal (any)   | 2   | 0.133 | 0.045 |
| Gene       |             |             |     |       |       |
| Ontology - |             |             |     |       |       |
| Molecular  | DNA         | experimen   |     |       |       |
| Function   | binding     | tal (any)   | 38  | 25.36 | 0.045 |
|            | RNA         |             |     |       |       |
|            | polymeras   |             |     |       |       |
|            | e II-       |             |     |       |       |
|            | specific    |             |     |       |       |
|            | DNA-        |             |     |       |       |
|            | binding     |             |     |       |       |
| Gene       |             |             |     |       |       |
| Ontology - | transcripti |             |     |       |       |
| Molecular  | on factor   | experimen   |     |       |       |
| Function   | binding     | tal (any)   | 9   | 3.229 | 0.045 |
| Gene       |             |             |     |       |       |
| Ontology - | cytokine    |             |     |       |       |
| Molecular  | receptor    | experimen   |     |       |       |
| Function   | activity    | tal (any)   | 4   | 0.718 | 0.045 |
| Gene       | double-     |             |     |       |       |
| Ontology - | stranded    |             |     |       |       |
| Molecular  | DNA         | experimen   |     |       |       |
| Function   | binding     | tal (any)   | 17  | 8.676 | 0.045 |
| Gene       |             |             |     |       |       |
| Ontology - |             |             |     |       |       |
| Molecular  | enzyme      | experimen   |     |       |       |
| Function   | binding     | tal (any)   | 35  | 22.85 | 0.045 |
| Gene       |             |             |     |       |       |
| Ontology - |             |             |     |       |       |
| Molecular  | kinase      | experimen   |     |       |       |
| Function   | activity    | tal (any)   | 25  | 14.83 | 0.045 |
| Gene       |             |             |     |       |       |
| Ontology - | mannosid    |             |     |       |       |
| Molecular  | ase         | experimen   |     |       |       |
| Function   | activity    | tal (any)   | 2   | 0.133 | 0.045 |

|            |             |           |    |       |       |
|------------|-------------|-----------|----|-------|-------|
| Gene       | signaling   |           |    |       |       |
| Gene       | pattern     |           |    |       |       |
| Ontology - | recognitio  |           |    |       |       |
| Molecular  | n receptor  | experimen |    |       |       |
| Function   | activity    | tal (any) | 2  | 0.133 | 0.045 |
| Gene       | signaling   |           |    |       |       |
| Ontology - | receptor    |           |    |       |       |
| Molecular  | activator   | experimen |    |       |       |
| Function   | activity    | tal (any) | 10 | 4.013 | 0.045 |
| Gene       |             |           |    |       |       |
| Ontology - |             |           |    |       |       |
| Molecular  | thioestera  | experimen |    |       |       |
| Function   | se binding  | tal (any) | 2  | 0.133 | 0.045 |
| Gene       | transcripti |           |    |       |       |
| Gene       | on          |           |    |       |       |
| Ontology - | regulatory  |           |    |       |       |
| Ontology - | region      |           |    |       |       |
| Molecular  | DNA         | experimen |    |       |       |
| Function   | binding     | tal (any) | 17 | 8.836 | 0.045 |
| Gene       |             |           |    |       |       |
| Ontology - |             |           |    |       |       |
| Molecular  | transformi  |           |    |       |       |
| Function   | ng growth   |           |    |       |       |
| Gene       | factor      |           |    |       |       |
| Gene       | beta        |           |    |       |       |
| Ontology - | receptor,   |           |    |       |       |
| Gene       | cytoplasm   |           |    |       |       |
| Ontology - | ic          |           |    |       |       |
| Molecular  | mediator    | experimen |    |       |       |
| Function   | activity    | tal (any) | 2  | 0.133 | 0.045 |
| Gene       |             |           |    |       |       |
| Ontology - |             |           |    |       |       |
| Molecular  | type I      |           |    |       |       |
| Function   | transformi  |           |    |       |       |
| Gene       | ng growth   |           |    |       |       |
| Gene       | factor      |           |    |       |       |
| Ontology - | beta        |           |    |       |       |
| Molecular  | receptor    | experimen |    |       |       |
| Function   | binding     | tal (any) | 2  | 0.120 | 0.045 |
| Gene       | ubiquitin   |           |    |       |       |
| Ontology - | protein     |           |    |       |       |
| Molecular  | ligase      | experimen |    |       |       |
| Function   | binding     | tal (any) | 9  | 3.415 | 0.045 |
| Gene       |             |           |    |       |       |
| Ontology - |             |           |    |       |       |
| Molecular  | integrin    | experimen |    |       |       |
| Function   | binding     | tal (any) | 5  | 1.236 | 0.046 |



|            |                                           |                       |    |       |          |
|------------|-------------------------------------------|-----------------------|----|-------|----------|
| Gene       | protein                                   |                       |    |       |          |
| Ontology - | heterodimerization                        | experimental (any)    | 12 | 5.381 | 0.046    |
| Gene       |                                           |                       |    |       |          |
| Ontology - | exogenous protein binding                 | experimental (strong) | 4  | 0.671 | 0.047    |
| Gene       |                                           |                       |    |       |          |
| Ontology - | virus receptor activity                   | experimental (strong) | 4  | 0.671 | 0.047    |
| Gene       |                                           |                       |    |       |          |
| Ontology - | I-SMAD binding                            | experimental (any)    | 2  | 0.146 | 0.047    |
| Gene       |                                           |                       |    |       |          |
| Ontology - | catalytic activity                        | experimental (any)    | 85 | 68.39 | 0.047    |
| Gene       |                                           |                       |    |       |          |
| Ontology - | histone deacetylase binding               | experimental (any)    | 5  | 1.262 | 0.047    |
| Gene       |                                           |                       |    |       |          |
| Ontology - | pattern recognition receptor activity     | experimental (any)    | 2  | 0.146 | 0.047    |
| Gene       |                                           |                       |    |       |          |
| Ontology - | enzyme binding                            | experimental (strong) | 27 | 16.83 | 0.048    |
| KEGG       | Toll-like receptor signaling pathway      | experimental (any)    | 15 | 1.169 | 6.68e-11 |
| KEGG       | Chagas disease (American trypanosomiasis) | experimental (any)    | 13 | 1.302 | 3.20e-8  |
| KEGG       | Pathways in cancer                        | experimental (any)    | 21 | 4.159 | 4.58e-8  |
| KEGG       | Hepatitis B                               | experimental (any)    | 14 | 1.727 | 5.65e-8  |

|      |                                              |                       |    |       |         |
|------|----------------------------------------------|-----------------------|----|-------|---------|
| KEGG | Rheumatoid arthritis                         | experimental (any)    | 11 | 0.997 | 9.51e-8 |
| KEGG | Leishmaniasis                                | experimental (any)    | 10 | 0.811 | 1.35e-7 |
| KEGG | Pertussis                                    | experimental (any)    | 10 | 0.877 | 2.55e-7 |
| KEGG | Malaria                                      | experimental (any)    | 8  | 0.505 | 4.33e-7 |
| KEGG | Measles                                      | experimental (any)    | 12 | 1.528 | 5.31e-7 |
| KEGG | NF-kappa B signaling pathway                 | experimental (any)    | 10 | 1.063 | 1.18e-6 |
| KEGG | MicroRNAs in cancer                          | experimental (any)    | 13 | 2.073 | 1.72e-6 |
| KEGG | Pancreatic cancer                            | experimental (any)    | 9  | 0.864 | 1.78e-6 |
| KEGG | Intestinal immune network for IgA production | experimental (any)    | 7  | 0.478 | 3.60e-6 |
| KEGG | Legionellosis                                | experimental (any)    | 8  | 0.704 | 3.78e-6 |
| KEGG | Tuberculosis                                 | experimental (any)    | 12 | 1.98  | 5.53e-6 |
| KEGG | Chagas disease (American trypanosomiasis)    | experimental (strong) | 12 | 1.807 | 5.86e-6 |
| KEGG | Rheumatoid arthritis                         | experimental (strong) | 9  | 0.929 | 5.86e-6 |
| KEGG | Toll-like receptor signaling pathway         | experimental (strong) | 12 | 1.781 | 5.86e-6 |
| KEGG | Proteoglycans in cancer                      | experimental (any)    | 14 | 2.817 | 6.83e-6 |
| KEGG | Toxoplasmosis                                | experimental (any)    | 10 | 1.395 | 9.16e-6 |

|      |                                              |                       |    |       |         |
|------|----------------------------------------------|-----------------------|----|-------|---------|
| KEGG | Intestinal immune network for IgA production | experimental (strong) | 6  | 0.387 | 2.68e-5 |
| KEGG | Influenza A                                  | experimental (any)    | 11 | 1.953 | 2.78e-5 |
| KEGG | Herpes simplex infection                     | experimental (any)    | 11 | 2.059 | 4.20e-5 |
| KEGG | Inflammatory bowel disease (IBD)             | experimental (any)    | 7  | 0.731 | 4.20e-5 |
| KEGG | RIG-I-like receptor signaling pathway        | experimental (any)    | 7  | 0.731 | 4.20e-5 |
| KEGG | TNF signaling pathway                        | experimental (any)    | 9  | 1.342 | 4.20e-5 |
| KEGG | Salmonella infection                         | experimental (any)    | 8  | 1.05  | 5.04e-5 |
| KEGG | Malaria                                      | experimental (strong) | 7  | 0.697 | 5.12e-5 |
| KEGG | Pathways in cancer                           | experimental (strong) | 19 | 5.988 | 5.12e-5 |
| KEGG | Tuberculosis                                 | experimental (strong) | 11 | 2.013 | 5.12e-5 |
| KEGG | Chemokine signaling pathway                  | experimental (any)    | 11 | 2.179 | 5.94e-5 |
| KEGG | Colorectal cancer                            | experimental (any)    | 7  | 0.811 | 7.38e-5 |
| KEGG | Leishmaniasis                                | experimental (strong) | 8  | 1.058 | 8.59e-5 |
| KEGG | Pertussis                                    | experimental (strong) | 8  | 1.084 | 9.24e-5 |

|      |                                        |                       |    |       |         |
|------|----------------------------------------|-----------------------|----|-------|---------|
| KEGG | Pancreatic cancer                      | experimental (strong) | 9  | 1.445 | 9.38e-5 |
| KEGG | NF-kappa B signaling pathway           | experimental (strong) | 9  | 1.471 | 9.91e-5 |
| KEGG | Hepatitis B                            | experimental (strong) | 12 | 2.762 | 1.08e-4 |
| KEGG | Viral myocarditis                      | experimental (any)    | 6  | 0.624 | 1.58e-4 |
| KEGG | Amoebiasis                             | experimental (any)    | 8  | 1.262 | 1.67e-4 |
| KEGG | Proteoglycans in cancer                | experimental (strong) | 14 | 3.923 | 1.73e-4 |
| KEGG | Measles                                | experimental (strong) | 10 | 2.039 | 1.84e-4 |
| KEGG | MicroRNAs in cancer                    | experimental (strong) | 13 | 3.562 | 2.44e-4 |
| KEGG | Apoptosis                              | experimental (any)    | 7  | 1.01  | 2.79e-4 |
| KEGG | Inflammatory bowel disease (IBD)       | experimental (strong) | 7  | 1.007 | 2.85e-4 |
| KEGG | Salmonella infection                   | experimental (strong) | 7  | 1.007 | 2.85e-4 |
| KEGG | Legionellosis                          | experimental (strong) | 6  | 0.723 | 3.44e-4 |
| KEGG | Cytokine-cytokine receptor interaction | experimental (any)    | 11 | 2.724 | 3.83e-4 |
| KEGG | Hepatitis C                            | experimental (any)    | 8  | 1.448 | 4.01e-4 |
| KEGG | Chemokine signaling pathway            | experimental (strong) | 10 | 2.323 | 4.28e-4 |

|      |                                      |                       |    |       |         |
|------|--------------------------------------|-----------------------|----|-------|---------|
| KEGG | Toxoplasmosis                        | experimental (strong) | 9  | 1.936 | 5.25e-4 |
| KEGG | Viral myocarditis                    | experimental (strong) | 5  | 0.516 | 5.85e-4 |
| KEGG | Dorso-ventral axis formation         | experimental (any)    | 4  | 0.306 | 7.62e-4 |
| KEGG | Focal adhesion                       | experimental (any)    | 10 | 2.511 | 7.62e-4 |
| KEGG | FoxO signaling pathway               | experimental (any)    | 8  | 1.608 | 7.62e-4 |
| KEGG | Prolactin signaling pathway          | experimental (any)    | 6  | 0.864 | 7.62e-4 |
| KEGG | Adherens junction                    | experimental (any)    | 6  | 0.890 | 8.75e-4 |
| KEGG | Amoebiasis                           | experimental (strong) | 7  | 1.239 | 8.77e-4 |
| KEGG | Leukocyte transendothelial migration | experimental (any)    | 7  | 1.302 | 0.001   |
| KEGG | Dorso-ventral axis formation         | experimental (strong) | 4  | 0.387 | 0.002   |
| KEGG | Axon guidance                        | experimental (any)    | 7  | 1.501 | 0.002   |
| KEGG | Endocytosis                          | experimental (any)    | 9  | 2.485 | 0.002   |
| KEGG | NOD-like receptor signaling pathway  | experimental (any)    | 5  | 0.691 | 0.002   |
| KEGG | Neurotrophin signaling pathway       | experimental (any)    | 7  | 1.501 | 0.002   |
| KEGG | PI3K-Akt signaling pathway           | experimental (any)    | 12 | 3.933 | 0.002   |

|      |                                                            |                       |    |       |       |
|------|------------------------------------------------------------|-----------------------|----|-------|-------|
| KEGG | Prion diseases                                             | experimental (any)    | 4  | 0.412 | 0.002 |
| KEGG | Small cell lung cancer                                     | experimental (any)    | 6  | 1.076 | 0.002 |
| KEGG | Herpes simplex infection                                   | experimental (strong) | 8  | 1.962 | 0.003 |
| KEGG | Epithelial cell signaling in Helicobacter pylori infection | experimental (any)    | 5  | 0.811 | 0.003 |
| KEGG | Hippo signaling pathway                                    | experimental (any)    | 8  | 2.02  | 0.003 |
| KEGG | MAPK signaling pathway                                     | experimental (any)    | 10 | 3.176 | 0.003 |
| KEGG | Osteoclast differentiation                                 | experimental (any)    | 7  | 1.581 | 0.003 |
| KEGG | Shigellosis                                                | experimental (any)    | 5  | 0.771 | 0.003 |
| KEGG | Non-alcoholic fatty liver disease (NAFLD)                  | experimental (strong) | 7  | 1.626 | 0.004 |
| KEGG | HTLV-I infection                                           | experimental (any)    | 10 | 3.202 | 0.004 |
| KEGG | T cell receptor signaling pathway                          | experimental (any)    | 6  | 1.276 | 0.004 |
| KEGG | Adherens junction                                          | experimental (strong) | 6  | 1.265 | 0.005 |
| KEGG | Colorectal cancer                                          | experimental (strong) | 6  | 1.291 | 0.005 |

|      |                                                            |                       |   |       |       |
|------|------------------------------------------------------------|-----------------------|---|-------|-------|
| KEGG | Cytokine-cytokine receptor interaction                     | experimental (strong) | 9 | 2.71  | 0.005 |
| KEGG | Epithelial cell signaling in Helicobacter pylori infection | experimental (strong) | 5 | 0.852 | 0.005 |
| KEGG | Influenza A                                                | experimental (strong) | 8 | 2.194 | 0.005 |
| KEGG | TNF signaling pathway                                      | experimental (strong) | 8 | 2.194 | 0.005 |
| KEGG | B cell receptor signaling pathway                          | experimental (any)    | 5 | 0.890 | 0.005 |
| KEGG | Non-alcoholic fatty liver disease (NAFLD)                  | experimental (any)    | 7 | 1.794 | 0.005 |
| KEGG | Notch signaling pathway                                    | experimental (any)    | 4 | 0.545 | 0.005 |
| KEGG | Apoptosis                                                  | experimental (strong) | 6 | 1.316 | 0.006 |
| KEGG | Chronic myeloid leukemia                                   | experimental (any)    | 5 | 0.957 | 0.006 |
| KEGG | Cytosolic DNA-sensing pathway                              | experimental (any)    | 4 | 0.585 | 0.006 |
| KEGG | Fanconi anemia pathway                                     | experimental (any)    | 4 | 0.598 | 0.006 |
| KEGG | Autoimmune thyroid disease                                 | experimental (strong) | 3 | 0.284 | 0.007 |

|      |                                       |                       |   |       |       |
|------|---------------------------------------|-----------------------|---|-------|-------|
| KEGG | Endocytosis                           | experimental (strong) | 7 | 1.884 | 0.007 |
| KEGG | FoxO signaling pathway                | experimental (strong) | 8 | 2.426 | 0.007 |
| KEGG | Graft-versus-host disease             | experimental (strong) | 3 | 0.284 | 0.007 |
| KEGG | Leukocyte transendothelial migration  | experimental (strong) | 6 | 1.394 | 0.007 |
| KEGG | NOD-like receptor signaling pathway   | experimental (strong) | 5 | 0.955 | 0.007 |
| KEGG | RIG-I-like receptor signaling pathway | experimental (strong) | 5 | 0.929 | 0.007 |
| KEGG | Shigellosis                           | experimental (strong) | 5 | 0.981 | 0.007 |
| KEGG | TGF-beta signaling pathway            | experimental (any)    | 5 | 1.023 | 0.007 |
| KEGG | Other types of O-glycan biosynthesis  | experimental (any)    | 3 | 0.332 | 0.008 |
| KEGG | Regulation of actin cytoskeleton      | experimental (any)    | 8 | 2.525 | 0.008 |
| KEGG | Viral carcinogenesis                  | experimental (any)    | 8 | 2.538 | 0.008 |
| KEGG | Cell cycle                            | experimental (any)    | 6 | 1.568 | 0.010 |
| KEGG | Axon guidance                         | experimental (strong) | 6 | 1.574 | 0.011 |



|      |                                           |                       |    |       |       |
|------|-------------------------------------------|-----------------------|----|-------|-------|
| KEGG | Neurotrophin signaling pathway            | experimental (strong) | 7  | 2.065 | 0.011 |
| KEGG | Notch signaling pathway                   | experimental (strong) | 4  | 0.697 | 0.011 |
| KEGG | Non-small cell lung cancer                | experimental (any)    | 4  | 0.718 | 0.011 |
| KEGG | Allograft rejection                       | experimental (strong) | 3  | 0.361 | 0.012 |
| KEGG | Fanconi anemia pathway                    | experimental (strong) | 3  | 0.361 | 0.012 |
| KEGG | Small cell lung cancer                    | experimental (strong) | 6  | 1.626 | 0.012 |
| KEGG | Allograft rejection                       | experimental (any)    | 3  | 0.385 | 0.012 |
| KEGG | Graft-versus-host disease                 | experimental (any)    | 3  | 0.385 | 0.012 |
| KEGG | PI3K-Akt signaling pathway                | experimental (strong) | 11 | 4.646 | 0.013 |
| KEGG | African trypanosomiasis                   | experimental (any)    | 3  | 0.399 | 0.013 |
| KEGG | Prion diseases                            | experimental (strong) | 3  | 0.413 | 0.016 |
| KEGG | Natural killer cell mediated cytotoxicity | experimental (any)    | 5  | 1.302 | 0.017 |
| KEGG | Wnt signaling pathway                     | experimental (any)    | 6  | 1.794 | 0.017 |
| KEGG | Autoimmune thyroid disease                | experimental (any)    | 3  | 0.452 | 0.018 |

|      |                                       |                       |   |       |       |
|------|---------------------------------------|-----------------------|---|-------|-------|
| KEGG | p53 signaling pathway                 | experimental (any)    | 4 | 0.864 | 0.019 |
| KEGG | Focal adhesion                        | experimental (strong) | 8 | 2.994 | 0.020 |
| KEGG | Phagosome                             | experimental (strong) | 4 | 0.852 | 0.020 |
| KEGG | Staphylococcus aureus infection       | experimental (strong) | 2 | 0.155 | 0.020 |
| KEGG | African trypanosomiasis               | experimental (strong) | 3 | 0.465 | 0.021 |
| KEGG | Hepatitis C                           | experimental (strong) | 6 | 1.884 | 0.021 |
| KEGG | Cell cycle                            | experimental (strong) | 6 | 1.91  | 0.022 |
| KEGG | TGF-beta signaling pathway            | experimental (strong) | 5 | 1.368 | 0.022 |
| KEGG | Staphylococcus aureus infection       | experimental (any)    | 3 | 0.492 | 0.022 |
| KEGG | Prolactin signaling pathway           | experimental (strong) | 5 | 1.394 | 0.023 |
| KEGG | Bladder cancer                        | experimental (any)    | 3 | 0.505 | 0.023 |
| KEGG | Cell adhesion molecules (CAMs)        | experimental (any)    | 5 | 1.448 | 0.025 |
| KEGG | Cytosolic DNA-sensing pathway         | experimental (strong) | 3 | 0.516 | 0.026 |
| KEGG | Pathogenic Escherichia coli infection | experimental (strong) | 3 | 0.542 | 0.029 |

|          |                                       |                       |    |       |          |
|----------|---------------------------------------|-----------------------|----|-------|----------|
| KEGG     | Jak-STAT signaling pathway            | experimental (any)    | 5  | 1.555 | 0.032    |
| KEGG     | N-Glycan biosynthesis                 | experimental (any)    | 3  | 0.624 | 0.039    |
| KEGG     | Prostate cancer                       | experimental (any)    | 4  | 1.103 | 0.039    |
| KEGG     | Chronic myeloid leukemia              | experimental (strong) | 5  | 1.626 | 0.040    |
| KEGG     | Alzheimer's disease                   | experimental (strong) | 4  | 1.11  | 0.042    |
| KEGG     | Phagosome                             | experimental (any)    | 5  | 1.687 | 0.042    |
| KEGG     | Endometrial cancer                    | experimental (any)    | 3  | 0.664 | 0.043    |
| KEGG     | Pathogenic Escherichia coli infection | experimental (any)    | 3  | 0.664 | 0.043    |
| KEGG     | Cell adhesion molecules (CAMs)        | experimental (strong) | 4  | 1.136 | 0.044    |
| KEGG     | MAPK signaling pathway                | experimental (strong) | 8  | 3.588 | 0.044    |
| KEGG     | Non-small cell lung cancer            | experimental (strong) | 4  | 1.161 | 0.047    |
| KEGG     | HTLV-I infection                      | experimental (strong) | 8  | 3.691 | 0.049    |
| KEGG     | Epstein-Barr virus infection          | experimental (any)    | 6  | 2.392 | 0.050    |
| Reactome | Cytokine Signaling in Immune system   | experimental (any)    | 38 | 9.793 | 1.55e-10 |

|          |                                            |                    |     |       |          |
|----------|--------------------------------------------|--------------------|-----|-------|----------|
| Reactome | Immune System                              | experimental (any) | 60  | 23.6  | 5.65e-10 |
| Reactome | Interferon alpha/beta signaling            | experimental (any) | 11  | 0.731 | 1.53e-8  |
| Reactome | Gene expression (Transcription)            | predicted (union)  | 614 | 508   | 3.53e-7  |
| Reactome | Generic Transcription Pathway              | predicted (union)  | 508 | 413.1 | 3.53e-7  |
| Reactome | RNA Polymerase II Transcription            | predicted (union)  | 557 | 457.6 | 3.53e-7  |
| Reactome | Signaling by Interleukins                  | experimental (any) | 26  | 7.334 | 1.89e-6  |
| Reactome | Innate Immune System                       | experimental (any) | 31  | 11.65 | 2.90e-5  |
| Reactome | Interferon Signaling                       | experimental (any) | 13  | 2.285 | 2.90e-5  |
| Reactome | Toll Like Receptor 4 (TLR4) Cascade        | experimental (any) | 11  | 1.541 | 2.90e-5  |
| Reactome | Interleukin-4 and Interleukin-13 signaling | experimental (any) | 10  | 1.355 | 4.65e-5  |
| Reactome | Toll-like Receptor Cascades                | experimental (any) | 11  | 1.873 | 1.16e-4  |
| Reactome | MyD88-independent TLR4 cascade             | experimental (any) | 9   | 1.222 | 1.21e-4  |

|          |                                                 |                          |     |       |         |
|----------|-------------------------------------------------|--------------------------|-----|-------|---------|
| Reactome | TRIF(TIC AM1)-mediated TLR4 signaling           | experimental (any)       | 9   | 1.222 | 1.21e-4 |
| Reactome | Immune System Gene expression                   | experimental (strong)    | 35  | 15.95 | 1.24e-4 |
| Reactome | Death Receptor Signalling Signal Transduction   | predicted (intersection) | 305 | 232.8 | 1.25e-4 |
| Reactome | RNA Polymerase II Transcription                 | experimental (any)       | 49  | 26.22 | 2.30e-4 |
| Reactome | Generic Transcription                           | predicted (intersection) | 275 | 209.7 | 2.63e-4 |
| Reactome | Pathway NF-kB is activated and signals survival | predicted (intersection) | 250 | 189.3 | 3.44e-4 |
| Reactome | p75 NTR receptor-mediated signalling            | experimental (any)       | 4   | 0.159 | 3.49e-4 |
| Reactome | Synthesis of PIPs at the plasma membrane        | experimental (any)       | 8   | 1.103 | 3.49e-4 |
| Reactome |                                                 | predicted (union)        | 35  | 18.35 | 3.76e-4 |

|          |                                                                                  |                        |   |       |         |
|----------|----------------------------------------------------------------------------------|------------------------|---|-------|---------|
|          | DDX58/IFI<br>H1-<br>mediated<br>induction<br>of<br>interferon-                   | experimen<br>tal (any) | 7 | 0.850 | 4.13e-4 |
| Reactome | Defective<br>LFNG<br>causes                                                      | experimen<br>tal (any) | 3 | 0.066 | 4.13e-4 |
| Reactome | SCDO3<br>Interleukin-<br>10<br>signaling                                         | experimen<br>tal (any) | 6 | 0.558 | 4.13e-4 |
|          | MyD88<br>dependen<br>t cascade<br>initiated<br>on                                | experimen<br>tal (any) | 8 | 1.169 | 4.13e-4 |
| Reactome | endosome                                                                         |                        |   |       |         |
|          | MyD88:M<br>AL(TIRAP<br>) cascade<br>initiated<br>on plasma<br>membran            | experimen<br>tal (any) | 8 | 1.222 | 4.13e-4 |
| Reactome | e                                                                                |                        |   |       |         |
|          | TAK1<br>activates<br>NFkB by<br>phosphory<br>lation and<br>activation<br>of IKKs | experimen<br>tal (any) | 5 | 0.372 | 4.13e-4 |
| Reactome | complex                                                                          |                        |   |       |         |
|          | Toll Like<br>Receptor<br>2 (TLR2)                                                | experimen<br>tal (any) | 8 | 1.222 | 4.13e-4 |
| Reactome | Cascade                                                                          |                        |   |       |         |
|          | Toll Like<br>Receptor<br>3 (TLR3)                                                | experimen<br>tal (any) | 8 | 1.183 | 4.13e-4 |
| Reactome | Cascade                                                                          |                        |   |       |         |

|          |                                                  |                       |    |       |         |
|----------|--------------------------------------------------|-----------------------|----|-------|---------|
| Reactome | Toll Like Receptor 7/8 (TLR7/8) Cascade          | experimental (any)    | 8  | 1.169 | 4.13e-4 |
| Reactome | Toll Like Receptor 9 (TLR9) Cascade              | experimental (any)    | 8  | 1.222 | 4.13e-4 |
| Reactome | Toll Like Receptor TLR1:TLR2 Cascade             | experimental (any)    | 8  | 1.222 | 4.13e-4 |
| Reactome | Toll Like Receptor TLR6:TLR2 Cascade             | experimental (any)    | 8  | 1.222 | 4.13e-4 |
| Reactome | p75NTR signals via NF-kB                         | experimental (any)    | 4  | 0.199 | 4.85e-4 |
| Reactome | Loss of Function of SMAD2/3 in Cancer            | experimental (any)    | 3  | 0.093 | 9.89e-4 |
| Reactome | Innate Immune System                             | experimental (strong) | 21 | 7.588 | 0.001   |
| Reactome | Chemokine receptors bind chemokines              | experimental (any)    | 5  | 0.505 | 0.002   |
| Reactome | SHC1 events in ERBB2 signaling                   | experimental (any)    | 4  | 0.279 | 0.002   |
| Reactome | Signaling by TGF-beta Receptor Complex in Cancer | experimental (any)    | 3  | 0.106 | 0.002   |

|          |                                                                              |                       |     |       |       |
|----------|------------------------------------------------------------------------------|-----------------------|-----|-------|-------|
| Reactome | TRAF6 mediated IRF7 activation in TLR7/8 or 9 signaling                      | experimental (any)    | 3   | 0.120 | 0.002 |
| Reactome | TRAF6 mediated induction of NFkB and MAP kinases upon TLR7/8 or 9 activation | experimental (any)    | 7   | 1.156 | 0.002 |
| Reactome | CD28 co-stimulation                                                          | predicted (union)     | 23  | 11.32 | 0.003 |
| Reactome | Membrane Trafficking Regulation of MECP2 expression and activity             | predicted (union)     | 262 | 214   | 0.003 |
| Reactome | Transcriptional Regulation by MECP2                                          | predicted (union)     | 40  | 23.04 | 0.003 |
| Reactome | Vesicle-mediated transport                                                   | predicted (union)     | 276 | 227.2 | 0.003 |
| Reactome | Interleukin-10 signaling                                                     | experimental (strong) | 6   | 0.671 | 0.003 |
| Reactome | Signal Transduction                                                          | experimental (strong) | 36  | 19.93 | 0.003 |
| Reactome | Interleukin-1 family signaling                                               | experimental (any)    | 8   | 1.727 | 0.003 |



|          |                                                 |                       |    |       |       |
|----------|-------------------------------------------------|-----------------------|----|-------|-------|
| Reactome | Interleukin-1 signaling                         | experimental (any)    | 7  | 1.302 | 0.003 |
| Reactome | PI5P, PP2A and IER3 Regulate PI3K/AKT Signaling | experimental (any)    | 7  | 1.289 | 0.003 |
| Reactome | Death Receptor Signalling                       | experimental (strong) | 8  | 1.445 | 0.004 |
| Reactome | Loss of Function of SMAD4 in Cancer             | experimental (any)    | 2  | 0.040 | 0.004 |
| Reactome | Negative regulation of the PI3K/AKT network     | experimental (any)    | 7  | 1.382 | 0.004 |
| Reactome | Neutrophil degranulation                        | experimental (any)    | 15 | 5.554 | 0.004 |
| Reactome | SMAD2/3 MH2 Domain Mutants in Cancer            | experimental (any)    | 2  | 0.040 | 0.004 |
| Reactome | SMAD4 MH2 Domain Mutants in Cancer              | experimental (any)    | 2  | 0.040 | 0.004 |
| Reactome | Signaling by ERBB2                              | experimental (any)    | 5  | 0.651 | 0.004 |
| Reactome | p75NTR recruits signalling complexes            | experimental (any)    | 3  | 0.159 | 0.004 |

|          |                                                                        |                          |    |       |       |
|----------|------------------------------------------------------------------------|--------------------------|----|-------|-------|
| Reactome | Neuronal System                                                        | predicted (intersection) | 95 | 62.98 | 0.005 |
| Reactome | Activation of RAC1                                                     | experimental (any)       | 3  | 0.173 | 0.005 |
| Reactome | Caspase activation via Death Receptors in the presence of ligand       | experimental (any)       | 3  | 0.186 | 0.005 |
| Reactome | ERBB2 Regulates Cell Motility                                          | experimental (any)       | 3  | 0.186 | 0.005 |
| Reactome | IRAK2 mediated activation of TAK1 complex upon TLR7/8 or 9 stimulation | experimental (any)       | 3  | 0.186 | 0.005 |
| Reactome | Pre-NOTCH Processing in Golgi                                          | experimental (any)       | 3  | 0.186 | 0.005 |
| Reactome | Signaling by Non-Receptor Tyrosine Kinases                             | experimental (any)       | 5  | 0.678 | 0.005 |
| Reactome | Signaling by PTK6                                                      | experimental (any)       | 5  | 0.678 | 0.005 |
| Reactome | Neurotransmitter release cycle                                         | predicted (intersection) | 21 | 8.41  | 0.006 |
| Reactome | Signaling by Non-Receptor Tyrosine Kinases                             | predicted (intersection) | 21 | 8.589 | 0.006 |

|          |                                                              |                          |     |       |       |
|----------|--------------------------------------------------------------|--------------------------|-----|-------|-------|
| Reactome | Signaling by PTK6                                            | predicted (intersection) | 21  | 8.589 | 0.006 |
| Reactome | Transcriptional Regulation by MECP2                          | predicted (intersection) | 24  | 10.56 | 0.006 |
| Reactome | Diseases of signal transduction                              | predicted (union)        | 173 | 136.3 | 0.006 |
| Reactome | Defective LFNG causes SCDO3                                  | experimental (strong)    | 3   | 0.129 | 0.006 |
| Reactome | Signaling by Interleukins                                    | experimental (strong)    | 19  | 7.924 | 0.006 |
| Reactome | p75 NTR receptor-mediated signalling                         | experimental (strong)    | 6   | 0.826 | 0.006 |
| Reactome | GRB2 events in ERBB2 signaling                               | experimental (any)       | 3   | 0.199 | 0.006 |
| Reactome | MyD88 cascade initiated on plasma membrane                   | experimental (any)       | 6   | 1.103 | 0.006 |
| Reactome | TRAF6-mediated induction of TAK1 complex within TLR4 complex | experimental (any)       | 3   | 0.199 | 0.006 |
| Reactome | Toll Like Receptor 10 (TLR10) Cascade                        | experimental (any)       | 6   | 1.103 | 0.006 |

|          |                                                       |                          |     |       |       |
|----------|-------------------------------------------------------|--------------------------|-----|-------|-------|
| Reactome | Toll Like Receptor 5 (TLR5) Cascade DAP12 interaction | experimental (any)       | 6   | 1.103 | 0.006 |
| Reactome | FCERI mediated MAPK activation                        | experimental (any)       | 4   | 0.465 | 0.007 |
| Reactome | SLIT2:ROBO1 increases RHOA activity                   | experimental (any)       | 2   | 0.053 | 0.007 |
| Reactome | MECP2 regulates neuronal receptors and channels       | predicted (intersection) | 11  | 3.221 | 0.008 |
| Reactome | Signaling by ERBB2                                    | predicted (intersection) | 20  | 8.231 | 0.008 |
| Reactome | PI Metabolism                                         | predicted (union)        | 46  | 28.89 | 0.008 |
| Reactome | MAP kinase activation                                 | experimental (any)       | 5   | 0.824 | 0.008 |
| Reactome | PIP3 activates AKT signaling                          | predicted (union)        | 123 | 93.32 | 0.009 |
| Reactome | CD28 dependent PI3K/Akt signaling                     | predicted (union)        | 16  | 7.419 | 0.010 |
| Reactome | Cell death signalling via NRAGE, NRIF and NADE        | experimental (any)       | 5   | 0.864 | 0.010 |

|          |                                                                                                                                             |                        |    |       |       |
|----------|---------------------------------------------------------------------------------------------------------------------------------------------|------------------------|----|-------|-------|
| Reactome | FasL/<br>CD95L<br>signaling                                                                                                                 | experimen<br>tal (any) | 2  | 0.066 | 0.010 |
| Reactome | Interleukin-<br>17<br>signaling                                                                                                             | experimen<br>tal (any) | 5  | 0.890 | 0.010 |
| Reactome | Interleukin-<br>36<br>pathway                                                                                                               | experimen<br>tal (any) | 2  | 0.066 | 0.010 |
| Reactome | JNK (c-<br>Jun<br>kinases)<br>phosphory<br>lation and<br>activation<br>mediated<br>by<br>activated<br>human<br>TAK1<br>Signal<br>transducti | experimen<br>tal (any) | 3  | 0.239 | 0.010 |
| Reactome | on by L1<br>Signaling<br>by SCF-                                                                                                            | experimen<br>tal (any) | 3  | 0.252 | 0.010 |
| Reactome | KIT<br>TRAF6<br>mediated                                                                                                                    | experimen<br>tal (any) | 4  | 0.531 | 0.010 |
| Reactome | IRF7<br>activation<br>activated<br>TAK1<br>mediates<br>p38<br>MAPK                                                                          | experimen<br>tal (any) | 3  | 0.239 | 0.010 |
| Reactome | activation                                                                                                                                  | experimen<br>tal (any) | 3  | 0.252 | 0.010 |
| Reactome | Netrin-1<br>signaling                                                                                                                       | predicted<br>(union)   | 31 | 17.96 | 0.012 |
| Reactome | Generic<br>Transcripti<br>on<br>Pathway                                                                                                     | experimen<br>tal (any) | 26 | 14.32 | 0.012 |

|          |                                                                   |                              |    |       |       |
|----------|-------------------------------------------------------------------|------------------------------|----|-------|-------|
| Reactome | Pre-<br>NOTCH<br>Processing<br>in the<br>Endoplasmic<br>Reticulum | experimen<br>tal (any)       | 2  | 0.080 | 0.013 |
| Reactome | SMAD2/3<br>Phosphor<br>ylation<br>Motif<br>Mutants in<br>Cancer   | experimen<br>tal (any)       | 2  | 0.080 | 0.013 |
| Reactome | TGFBR1<br>KD<br>Mutants in<br>Cancer                              | experimen<br>tal (any)       | 2  | 0.080 | 0.013 |
| Reactome | TRIF-<br>mediated<br>programm<br>ed cell<br>death                 | experimen<br>tal (any)       | 2  | 0.080 | 0.013 |
| Reactome | Chemokin<br>e<br>receptors<br>bind<br>chemokin<br>es              | experimen<br>tal<br>(strong) | 4  | 0.413 | 0.014 |
| Reactome | Cytokine<br>Signaling<br>in Immune<br>system                      | experimen<br>tal<br>(strong) | 20 | 9.395 | 0.014 |
| Reactome | Loss of<br>Function<br>of<br>SMAD2/3<br>in Cancer                 | experimen<br>tal<br>(strong) | 3  | 0.181 | 0.014 |
| Reactome | NF-kB is<br>activated<br>and<br>signals<br>survival               | experimen<br>tal<br>(strong) | 3  | 0.181 | 0.014 |

|          |                                                                                                            |                              |     |       |       |
|----------|------------------------------------------------------------------------------------------------------------|------------------------------|-----|-------|-------|
| Reactome | Signaling<br>by TGF-<br>beta<br>Receptor<br>Complex<br>in Cancer                                           | experimen<br>tal<br>(strong) | 3   | 0.181 | 0.014 |
| Reactome | Intracellul<br>ar<br>signaling<br>by second<br>messenger                                                   | predicted<br>(union)         | 138 | 107.8 | 0.015 |
| Reactome | Transport<br>to the<br>Golgi and<br>subseque<br>nt<br>modificati<br>on                                     | predicted<br>(union)         | 81  | 58.57 | 0.015 |
| Reactome | Neutrophil<br>degranula<br>tion                                                                            | experimen<br>tal<br>(strong) | 10  | 3.02  | 0.015 |
| Reactome | Anchoring<br>fibril<br>formation                                                                           | experimen<br>tal (any)       | 2   | 0.093 | 0.015 |
| Reactome | Caspase<br>activation<br>via<br>extrinsic<br>apoptotic<br>signalling<br>pathway                            | experimen<br>tal (any)       | 3   | 0.306 | 0.015 |
| Reactome | DEx/H-<br>box<br>helicases<br>activate<br>type I IFN<br>and<br>inflammat<br>ory<br>cytokines<br>production | experimen<br>tal (any)       | 2   | 0.093 | 0.015 |

|          |                                                                                             |                    |   |       |       |
|----------|---------------------------------------------------------------------------------------------|--------------------|---|-------|-------|
| Reactome | Diseases associated with the TLR signaling cascade                                          | experimental (any) | 3 | 0.306 | 0.015 |
| Reactome | Diseases of Immune System                                                                   | experimental (any) | 3 | 0.306 | 0.015 |
| Reactome | Inactivation of CDC42 and RAC1                                                              | experimental (any) | 2 | 0.093 | 0.015 |
| Reactome | Loss of Function of TGFBR1 in Cancer                                                        | experimental (any) | 2 | 0.093 | 0.015 |
| Reactome | Nucleotide-binding domain, leucine rich repeat containing receptor (NLR) signaling pathways | experimental (any) | 4 | 0.624 | 0.015 |
| Reactome | RUNX3 regulates CDKN1A transcription                                                        | experimental (any) | 2 | 0.093 | 0.015 |
| Reactome | Sema4D in semaphorin signaling                                                              | experimental (any) | 3 | 0.306 | 0.015 |



|          |                                                                        |                       |    |       |       |
|----------|------------------------------------------------------------------------|-----------------------|----|-------|-------|
| Reactome | Senescence-Associated Secretory Phenotype (SASP)                       | experimental (any)    | 5  | 0.983 | 0.015 |
| Reactome | Antiviral mechanism by IFN-stimulated genes                            | experimental (any)    | 5  | 1.036 | 0.016 |
| Reactome | Estrogen-dependent nuclear events downstream of ESR-membrane signaling | experimental (any)    | 3  | 0.319 | 0.016 |
| Reactome | Interferon gamma signaling                                             | experimental (any)    | 5  | 1.05  | 0.016 |
| Reactome | Signaling by Tyrosine Kinases                                          | experimental (any)    | 13 | 5.554 | 0.016 |
| Reactome | TRAF6 mediated NF-kB activation                                        | experimental (any)    | 3  | 0.319 | 0.016 |
| Reactome | p75NTR signals via NF-kB                                               | experimental (strong) | 3  | 0.206 | 0.017 |
| Reactome | SHC1 events in ERBB2 signaling                                         | experimental (strong) | 4  | 0.465 | 0.018 |

|          |                                                                        |                       |    |       |       |
|----------|------------------------------------------------------------------------|-----------------------|----|-------|-------|
| Reactome | RNA Polymerase II Transcription                                        | experimental (any)    | 27 | 15.85 | 0.018 |
| Reactome | ERBB2 Regulates Cell Motility                                          | experimental (strong) | 3  | 0.232 | 0.019 |
| Reactome | IRAK2 mediated activation of TAK1 complex upon TLR7/8 or 9 stimulation | experimental (strong) | 3  | 0.232 | 0.019 |
| Reactome | Signaling by ERBB2                                                     | experimental (strong) | 5  | 0.826 | 0.019 |
| Reactome | TRAF6-mediated induction of TAK1 complex within TLR4 complex           | experimental (strong) | 3  | 0.232 | 0.019 |
| Reactome | DAP12 signaling                                                        | experimental (any)    | 3  | 0.345 | 0.019 |
| Reactome | Sema4D mediated inhibition of cell attachment and migration            | experimental (any)    | 2  | 0.106 | 0.019 |
| Reactome | Transcriptional regulation of pluripotent stem cells                   | experimental (any)    | 3  | 0.345 | 0.019 |

|          |                                                     |              |    |       |       |
|----------|-----------------------------------------------------|--------------|----|-------|-------|
| Reactome | Interleukin-4 and Interleukin-13 signaling (strong) | experimental | 8  | 2.22  | 0.020 |
| Reactome | Intracellular signaling by second messengers (any)  | experimental | 10 | 3.827 | 0.020 |
| Reactome | Signaling by ERBB4 GPCR downstream (any)            | experimental | 4  | 0.704 | 0.020 |
| Reactome | Signalling (strong)                                 | experimental | 11 | 4.104 | 0.021 |
| Reactome | Loss of Function of SMAD4 in Cancer (strong)        | experimental | 2  | 0.077 | 0.021 |
| Reactome | Pre-NOTCH Processing in Golgi (strong)              | experimental | 3  | 0.258 | 0.021 |
| Reactome | SMAD2/3 MH2 Domain Mutants in Cancer (strong)       | experimental | 2  | 0.077 | 0.021 |
| Reactome | SMAD4 MH2 Domain Mutants in Cancer (strong)         | experimental | 2  | 0.077 | 0.021 |
| Reactome | Signaling by Non-Receptor Tyrosine Kinases (strong) | experimental | 5  | 0.929 | 0.021 |

|          |                                                                       |                          |    |       |       |
|----------|-----------------------------------------------------------------------|--------------------------|----|-------|-------|
| Reactome | Signaling by PTK6                                                     | experimental (strong)    | 5  | 0.929 | 0.021 |
| Reactome | TAK1 activates NFkB by phosphorylation and activation of IKKs complex | experimental (strong)    | 4  | 0.568 | 0.021 |
| Reactome | Toll Like Receptor 4 (TLR4) Cascade                                   | experimental (strong)    | 7  | 1.807 | 0.021 |
| Reactome | Netrin-1 signaling                                                    | predicted (intersection) | 19 | 8.231 | 0.022 |
| Reactome | Signaling by EGFR DAP12                                               | predicted (intersection) | 19 | 8.231 | 0.022 |
| Reactome | interactions                                                          | predicted (union)        | 25 | 14.06 | 0.022 |
| Reactome | EGFR Transactivation by Gastrin                                       | experimental (any)       | 2  | 0.120 | 0.022 |
| Reactome | MyD88 deficiency (TLR2/4)                                             | experimental (any)       | 2  | 0.120 | 0.022 |
| Reactome | Regulated proteolysis of p75NTR                                       | experimental (any)       | 2  | 0.120 | 0.022 |
| Reactome | Transcriptional Regulation by MECP2                                   | experimental (any)       | 4  | 0.731 | 0.022 |
| Reactome | NOD1/2 Signaling Pathway                                              | experimental (any)       | 3  | 0.385 | 0.024 |

|          |                                                         |                       |   |       |       |
|----------|---------------------------------------------------------|-----------------------|---|-------|-------|
| Reactome | Signaling by ROBO receptors                             | experimental (strong) | 5 | 0.981 | 0.025 |
| Reactome | CASP8 activity is inhibited                             | experimental (any)    | 2 | 0.133 | 0.025 |
| Reactome | Dimerization of procaspase-8                            | experimental (any)    | 2 | 0.133 | 0.025 |
| Reactome | Fc epsilon receptor (FCER1) signaling                   | experimental (any)    | 6 | 1.714 | 0.025 |
| Reactome | IRAK1 recruits IKK complex                              | experimental (any)    | 2 | 0.133 | 0.025 |
| Reactome | IRAK1 recruits IKK complex upon TLR7/8 or 9 stimulation | experimental (any)    | 2 | 0.133 | 0.025 |
| Reactome | IRAK2 mediated activation of TAK1 complex               | experimental (any)    | 2 | 0.133 | 0.025 |
| Reactome | IRAK4 deficiency (TLR2/4)                               | experimental (any)    | 2 | 0.133 | 0.025 |
| Reactome | PIP3 activates AKT signaling                            | experimental (any)    | 9 | 3.362 | 0.025 |
| Reactome | RUNX3 regulates p14-ARF                                 | experimental (any)    | 2 | 0.133 | 0.025 |
| Reactome | Regulation by c-FLIP                                    | experimental (any)    | 2 | 0.133 | 0.025 |

|          |                                                                  |                       |    |       |       |
|----------|------------------------------------------------------------------|-----------------------|----|-------|-------|
| Reactome | EPHB-mediated forward signaling                                  | experimental (any)    | 3  | 0.412 | 0.026 |
| Reactome | Negative regulation of the PI3K/AKT network                      | predicted (union)     | 58 | 40.22 | 0.027 |
| Reactome | Transcriptional regulation by RUNX3                              | experimental (any)    | 5  | 1.249 | 0.027 |
| Reactome | Caspase activation via Death Receptors in the presence of ligand | experimental (strong) | 3  | 0.310 | 0.028 |
| Reactome | GRB2 events in ERBB2 signaling                                   | experimental (strong) | 3  | 0.310 | 0.028 |
| Reactome | GPCR downstream signalling                                       | experimental (any)    | 15 | 7.52  | 0.028 |
| Reactome | Gene expression (Transcription)                                  | experimental (any)    | 28 | 17.55 | 0.028 |
| Reactome | Interleukin-6 signaling                                          | experimental (any)    | 2  | 0.146 | 0.028 |
| Reactome | RHO GTPases activate KTN1                                        | experimental (any)    | 2  | 0.146 | 0.028 |
| Reactome | TGF-beta receptor signaling activates SMADs                      | experimental (any)    | 3  | 0.425 | 0.028 |

|          |                                                        |                       |     |       |       |
|----------|--------------------------------------------------------|-----------------------|-----|-------|-------|
| Reactome | Asparagine N-linked glycosylation                      | predicted (union)     | 128 | 100.7 | 0.029 |
| Reactome | Signaling by NTRKs                                     | predicted (union)     | 52  | 35.53 | 0.029 |
| Reactome | Signaling by Receptor Tyrosine Kinases                 | predicted (union)     | 197 | 162.8 | 0.029 |
| Reactome | CD28 co-stimulation                                    | experimental (any)    | 3   | 0.438 | 0.029 |
| Reactome | FasL/CD95L signaling                                   | experimental (strong) | 2   | 0.103 | 0.030 |
| Reactome | MyD88:MAL(TIRAP) cascade initiated on plasma membrane  | experimental (strong) | 6   | 1.549 | 0.030 |
| Reactome | Pre-NOTCH Processing in the Endoplasmic Reticulum      | experimental (strong) | 2   | 0.103 | 0.030 |
| Reactome | Synthesis of Prostaglandins (PG) and Thromboxanes (TX) | experimental (strong) | 2   | 0.103 | 0.030 |
| Reactome | Toll Like Receptor 2 (TLR2) Cascade                    | experimental (strong) | 6   | 1.549 | 0.030 |

|          |                                                      |                          |    |       |       |
|----------|------------------------------------------------------|--------------------------|----|-------|-------|
| Reactome | Toll Like Receptor TLR1:TLR2 Cascade                 | experimental (strong)    | 6  | 1.549 | 0.030 |
| Reactome | Toll Like Receptor TLR6:TLR2 Cascade                 | experimental (strong)    | 6  | 1.549 | 0.030 |
| Reactome | Signaling by ERBB4 MyD88-independent TLR4 cascade    | predicted (intersection) | 20 | 9.125 | 0.031 |
| Reactome | PI5P, PP2A and IER3 Regulate PI3K/AKT Signaling      | experimental (strong)    | 6  | 1.6   | 0.031 |
| Reactome | Signaling by NOTCH                                   | experimental (strong)    | 7  | 2.091 | 0.031 |
| Reactome | TRIF(TICAM1)-mediated TLR4 signaling                 | experimental (strong)    | 6  | 1.6   | 0.031 |
| Reactome | Toll-like Receptor Cascades                          | experimental (strong)    | 7  | 2.091 | 0.031 |
| Reactome | Diseases associated with O-glycosylation of proteins | experimental (strong)    | 3  | 0.361 | 0.032 |
| Reactome | CD28 dependent Vav1 pathway                          | experimental (any)       | 2  | 0.159 | 0.032 |



|          |                                                                                     |                                            |    |       |       |
|----------|-------------------------------------------------------------------------------------|--------------------------------------------|----|-------|-------|
| Reactome | ERBB2<br>Activates<br>PTK6<br>Signaling                                             | experimen<br>tal (any)<br>experimen<br>tal | 2  | 0.159 | 0.032 |
| Reactome | Signaling<br>by GPCR                                                                | tal<br>(strong)                            | 11 | 4.62  | 0.034 |
| Reactome | Activation<br>of NMDA<br>receptors<br>and<br>postsynap<br>tic events                | predicted<br>(intersecti<br>on)            | 25 | 12.7  | 0.035 |
| Reactome | Competin<br>g<br>endogeno<br>us RNAs<br>(ceRNAs)<br>regulate<br>PTEN<br>translation | predicted<br>(intersecti<br>on)            | 7  | 1.789 | 0.035 |
| Reactome | Intracellul<br>ar<br>signaling<br>by second<br>messenger                            | predicted<br>(intersecti<br>on)            | 72 | 49.38 | 0.035 |
| Reactome | Negative<br>regulation<br>of the<br>PI3K/AKT<br>network                             | predicted<br>(intersecti<br>on)            | 33 | 18.43 | 0.035 |
| Reactome | PIP3<br>activates<br>AKT<br>signaling                                               | predicted<br>(intersecti<br>on)            | 64 | 42.76 | 0.035 |
| Reactome | Deubiquiti<br>nation                                                                | experimen<br>tal<br>(strong)               | 7  | 2.246 | 0.035 |
| Reactome | Developm<br>ental<br>Biology                                                        | experimen<br>tal<br>(strong)               | 16 | 8.182 | 0.035 |

|          |                                                                                                                      |                          |    |       |       |
|----------|----------------------------------------------------------------------------------------------------------------------|--------------------------|----|-------|-------|
| Reactome | Generic<br>Transcription<br>Pathway                                                                                  | experimental<br>(strong) | 18 | 9.782 | 0.035 |
| Reactome | JNK (c-<br>Jun<br>kinases)<br>phosphory-<br>lation and<br>activation<br>mediated<br>by<br>activated<br>human<br>TAK1 | experimental<br>(strong) | 3  | 0.387 | 0.035 |
| Reactome | MyD88<br>deficiency<br>(TLR2/4)<br>TRIF-<br>mediated                                                                 | experimental<br>(strong) | 2  | 0.129 | 0.035 |
| Reactome | programmed<br>cell<br>death<br>activated<br>TAK1<br>mediates                                                         | experimental<br>(strong) | 2  | 0.129 | 0.035 |
| Reactome | p38<br>MAPK<br>activation<br>p75NTR<br>recruits<br>signalling<br>complexes                                           | experimental<br>(strong) | 3  | 0.387 | 0.035 |
| Reactome | FCERI<br>mediated<br>MAPK<br>activation                                                                              | experimental<br>(strong) | 2  | 0.129 | 0.035 |
| Reactome | Caspase<br>activation<br>via<br>extrinsic<br>apoptotic<br>signalling                                                 | predicted<br>(union)     | 19 | 10.15 | 0.036 |
| Reactome | pathway                                                                                                              | experimental<br>(strong) | 3  | 0.439 | 0.036 |

|          |                                                            |                          |    |       |       |
|----------|------------------------------------------------------------|--------------------------|----|-------|-------|
| Reactome | Class A/1<br>(Rhodopsin-like receptors)                    | experimental<br>(strong) | 5  | 1.265 | 0.036 |
| Reactome | Disease Diseases associated with the TLR signaling cascade | experimental<br>(strong) | 16 | 8.621 | 0.036 |
| Reactome | Diseases of Immune System                                  | experimental<br>(strong) | 3  | 0.413 | 0.036 |
| Reactome | Gene expression (Transcription)                            | experimental<br>(strong) | 3  | 0.413 | 0.036 |
| Reactome | IRAK1 recruits IKK complex                                 | experimental<br>(strong) | 19 | 10.79 | 0.036 |
| Reactome | IRAK1 recruits IKK complex upon TLR7/8 or 9 stimulation    | experimental<br>(strong) | 2  | 0.155 | 0.036 |
| Reactome | IRAK2 mediated activation of TAK1 complex                  | experimental<br>(strong) | 2  | 0.155 | 0.036 |
| Reactome | IRAK4 deficiency (TLR2/4)                                  | experimental<br>(strong) | 2  | 0.155 | 0.036 |

|          |                                                                                             |                       |    |       |       |
|----------|---------------------------------------------------------------------------------------------|-----------------------|----|-------|-------|
| Reactome | Loss of Function of TGFBR1 in Cancer                                                        | experimental (strong) | 2  | 0.155 | 0.036 |
| Reactome | Negative regulation of the PI3K/AKT network                                                 | experimental (strong) | 6  | 1.755 | 0.036 |
| Reactome | Nucleotide-binding domain, leucine rich repeat containing receptor (NLR) signaling pathways | experimental (strong) | 4  | 0.852 | 0.036 |
| Reactome | Peptide ligand-binding receptors                                                            | experimental (strong) | 4  | 0.774 | 0.036 |
| Reactome | Pre-NOTCH Expression and Processing                                                         | experimental (strong) | 4  | 0.800 | 0.036 |
| Reactome | RHO GTPases activate KTN1                                                                   | experimental (strong) | 2  | 0.155 | 0.036 |
| Reactome | RNA Polymerase II Transcription                                                             | experimental (strong) | 18 | 10.01 | 0.036 |
| Reactome | RUNX3 regulates CDKN1A transcription                                                        | experimental (strong) | 2  | 0.155 | 0.036 |

|          |                                                                                  |                          |   |       |       |
|----------|----------------------------------------------------------------------------------|--------------------------|---|-------|-------|
| Reactome | SMAD2/3<br>Phosphorylation<br>Motif<br>Mutants in<br>Cancer                      | experimental<br>(strong) | 2 | 0.155 | 0.036 |
| Reactome | Sema4D<br>in<br>semaphorin<br>signaling                                          | experimental<br>(strong) | 3 | 0.413 | 0.036 |
| Reactome | Senescence-<br>Associated<br>Secretory<br>Phenotype (SASP)                       | experimental<br>(strong) | 4 | 0.826 | 0.036 |
| Reactome | Signaling<br>by ERBB4<br>TGF-beta<br>receptor<br>signaling<br>activates<br>SMADs | experimental<br>(strong) | 4 | 0.826 | 0.036 |
| Reactome | TGFBR1<br>KD<br>Mutants in<br>Cancer                                             | experimental<br>(strong) | 2 | 0.155 | 0.036 |
| Reactome | GRB2<br>events in<br>EGFR<br>signaling                                           | experimental<br>(any)    | 2 | 0.173 | 0.036 |
| Reactome | NRIF<br>signals<br>cell death<br>from the<br>nucleus                             | experimental<br>(any)    | 2 | 0.173 | 0.036 |
| Reactome | RIPK1-<br>mediated<br>regulated<br>necrosis                                      | experimental<br>(any)    | 2 | 0.173 | 0.036 |
| Reactome | Regulated<br>Necrosis                                                            | experimental<br>(any)    | 2 | 0.173 | 0.036 |

|          |                                                                          |                       |    |       |       |
|----------|--------------------------------------------------------------------------|-----------------------|----|-------|-------|
| Reactome | Regulation of necroptotic cell death                                     | experimental (any)    | 2  | 0.173 | 0.036 |
| Reactome | SHC1 events in ERBB4 signaling                                           | experimental (any)    | 2  | 0.173 | 0.036 |
| Reactome | Signaling by Activin                                                     | experimental (any)    | 2  | 0.173 | 0.036 |
| Reactome | Signaling by NOTCH                                                       | experimental (any)    | 7  | 2.485 | 0.036 |
| Reactome | TRAF3-dependent IRF activation pathway                                   | experimental (any)    | 2  | 0.173 | 0.036 |
| Reactome | Costimulation by the CD28 family                                         | predicted (union)     | 37 | 23.82 | 0.038 |
| Reactome | Signaling by ERBB4                                                       | predicted (union)     | 32 | 19.91 | 0.038 |
| Reactome | EPHB-mediated forward signaling                                          | experimental (strong) | 3  | 0.465 | 0.038 |
| Reactome | Signal transduction by L1                                                | experimental (strong) | 3  | 0.465 | 0.038 |
| Reactome | Immunoregulatory interactions between a Lymphoid and a non-Lymphoid cell | experimental (any)    | 5  | 1.408 | 0.038 |

|          |                                                        |                    |    |       |       |
|----------|--------------------------------------------------------|--------------------|----|-------|-------|
| Reactome | Constitutive Signaling by Aberrant PI3K in Cancer      | experimental (any) | 4  | 0.943 | 0.039 |
| Reactome | EPHA-mediated growth cone collapse                     | experimental (any) | 2  | 0.186 | 0.039 |
| Reactome | G alpha (12/13) signalling events                      | experimental (any) | 4  | 0.930 | 0.039 |
| Reactome | ISG15 antiviral mechanism                              | experimental (any) | 4  | 0.930 | 0.039 |
| Reactome | PTK6 Regulates RHO GTPases, RAS GTPase and MAP kinases | experimental (any) | 2  | 0.186 | 0.039 |
| Reactome | SHC1 events in EGFR signaling                          | experimental (any) | 2  | 0.186 | 0.039 |
| Reactome | Synthesis of Prostaglandins (PG) and Thromboxanes (TX) | experimental (any) | 2  | 0.186 | 0.039 |
| Reactome | Role of LAT2/NTAL/LAB on calcium mobilization          | predicted (union)  | 10 | 4.295 | 0.041 |

|          |                                                                              |                                            |   |       |       |
|----------|------------------------------------------------------------------------------|--------------------------------------------|---|-------|-------|
| Reactome | Pre-<br>NOTCH<br>Expressio<br>n and<br>Processin<br>g                        | experimen<br>tal (any)<br>experimen<br>tal | 4 | 0.957 | 0.041 |
| Reactome | Activation<br>of RAC1                                                        | (strong)                                   | 2 | 0.181 | 0.042 |
| Reactome | Cell death<br>signalling<br>via<br>NRAGE,<br>NRIF and<br>NADE                | experimen<br>tal<br>(strong)               | 3 | 0.490 | 0.042 |
| Reactome | DDX58/IFI<br>H1-<br>mediated<br>induction<br>of<br>interferon-<br>alpha/beta | experimen<br>tal<br>(strong)               | 4 | 0.929 | 0.042 |
| Reactome | G alpha<br>(12/13)<br>signalling<br>events                                   | experimen<br>tal<br>(strong)               | 3 | 0.490 | 0.042 |
| Reactome | Intracellul<br>ar<br>signaling<br>by second<br>messenger                     | experimen<br>tal<br>(strong)               | 9 | 3.794 | 0.042 |
| Reactome | Regulated<br>proteolysi<br>s of<br>p75NTR                                    | experimen<br>tal<br>(strong)               | 2 | 0.181 | 0.042 |
| Reactome | Resolutio<br>n of D-<br>Loop<br>Structures                                   | experimen<br>tal<br>(strong)               | 2 | 0.181 | 0.042 |



|          |                                                                                     |                       |   |       |       |
|----------|-------------------------------------------------------------------------------------|-----------------------|---|-------|-------|
| Reactome | Resolution of D-loop Structures through Holliday Junction Intermediates             | experimental (strong) | 2 | 0.181 | 0.042 |
| Reactome | Resolution of D-loop Structures through Synthesis-Dependent Strand Annealing (SDSA) | experimental (strong) | 2 | 0.181 | 0.042 |
| Reactome | Sema4D mediated inhibition of cell attachment and migration                         | experimental (strong) | 2 | 0.181 | 0.042 |
| Reactome | TRAF6 mediated IRF7 activation in TLR7/8 or 9 signaling                             | experimental (strong) | 2 | 0.181 | 0.042 |
| Reactome | Transcriptional regulation of pluripotent stem cells                                | experimental (strong) | 3 | 0.490 | 0.042 |

|          |                                                      |                          |    |       |       |
|----------|------------------------------------------------------|--------------------------|----|-------|-------|
| Reactome | Activation of IRF3/IRF7 mediated by TBK1/IKK epsilon | experimental (any)       | 2  | 0.199 | 0.042 |
| Reactome | Constitutive Signaling by EGFRvIII                   | experimental (any)       | 2  | 0.199 | 0.042 |
| Reactome | PI3K events in ERBB2 signaling                       | experimental (any)       | 2  | 0.199 | 0.042 |
| Reactome | Regulation of TLR by endogenous ligand               | experimental (any)       | 2  | 0.199 | 0.042 |
| Reactome | Signaling by EGFRvIII in Cancer                      | experimental (any)       | 2  | 0.199 | 0.042 |
| Reactome | Signaling by TGF-beta Receptor Complex               | experimental (any)       | 4  | 0.970 | 0.042 |
| Reactome | PI5P, PP2A and IER3 Regulate PI3K/AKT Signaling      | predicted (intersection) | 31 | 17.36 | 0.043 |
| Reactome | PI5P, PP2A and IER3 Regulate PI3K/AKT Signaling      | predicted (union)        | 54 | 37.87 | 0.044 |
| Reactome | Signaling by GPCR                                    | experimental (any)       | 15 | 8.172 | 0.044 |

|          |                                                                           |                          |     |       |       |
|----------|---------------------------------------------------------------------------|--------------------------|-----|-------|-------|
| Reactome | Signaling by Receptor Tyrosine Kinases Phospholipid metabolism            | predicted (intersection) | 101 | 74.61 | 0.045 |
| Reactome | Signaling by NTRK2 (TRKB)                                                 | predicted (union)        | 17  | 8.981 | 0.046 |
| Reactome | Cellular Senescence                                                       | experimental (any)       | 6   | 2.099 | 0.046 |
| Reactome | FOXO-mediated transcription of cell cycle genes                           | experimental (any)       | 2   | 0.213 | 0.046 |
| Reactome | G alpha (i) signalling events                                             | experimental (any)       | 9   | 3.986 | 0.046 |
| Reactome | TGF-beta receptor signaling in EMT (epithelial to mesenchymal transition) | experimental (any)       | 2   | 0.213 | 0.046 |

|          |                                                                                                          |                       |   |       |       |
|----------|----------------------------------------------------------------------------------------------------------|-----------------------|---|-------|-------|
| Reactome | Transcription of E2F targets under negative control by p107 (RBL1) and p130 (RBL2) in complex with HDAC1 | experimental (any)    | 2 | 0.213 | 0.046 |
| Reactome | Transcriptional regulation by RUNX2                                                                      | experimental (any)    | 5 | 1.528 | 0.046 |
| Reactome | Deubiquitination                                                                                         | experimental (any)    | 8 | 3.362 | 0.048 |
| Reactome | Cell surface interactions at the vascular wall                                                           | experimental (any)    | 5 | 1.568 | 0.049 |
| Reactome | Gastrin-CREB signalling pathway via PKC and MAPK                                                         | experimental (any)    | 2 | 0.226 | 0.049 |
| Reactome | Regulation of RUNX1 Expression and Activity                                                              | experimental (any)    | 2 | 0.226 | 0.049 |
| Reactome | Signaling by NODAL                                                                                       | experimental (any)    | 2 | 0.226 | 0.049 |
| Reactome | CD28 dependent Vav1 pathway                                                                              | experimental (strong) | 2 | 0.206 | 0.050 |

|          |              |           |    |       |       |
|----------|--------------|-----------|----|-------|-------|
|          | ERBB2        |           |    |       |       |
|          | Activates    | experimen |    |       |       |
|          | PTK6         | tal       |    |       |       |
| Reactome | Signaling    | (strong)  | 2  | 0.206 | 0.050 |
|          | Interleukin- | experimen |    |       |       |
|          | 1            | tal       |    |       |       |
| Reactome | signaling    | (strong)  | 4  | 0.981 | 0.050 |
|          | MyD88        |           |    |       |       |
|          | dependen     |           |    |       |       |
|          | t cascade    |           |    |       |       |
|          | initiated    | experimen |    |       |       |
|          | on           | tal       |    |       |       |
| Reactome | endosome     | (strong)  | 5  | 1.523 | 0.050 |
|          | Signaling    | experimen |    |       |       |
|          | by Activin   | tal       |    |       |       |
| Reactome | Signaling    | (strong)  | 2  | 0.206 | 0.050 |
|          | by           |           |    |       |       |
|          | Receptor     | experimen |    |       |       |
|          | Tyrosine     | tal       |    |       |       |
| Reactome | Kinases      | (strong)  | 11 | 5.42  | 0.050 |
|          | TRAF6        |           |    |       |       |
|          | mediated     |           |    |       |       |
|          | induction    |           |    |       |       |
|          | of NFkB      |           |    |       |       |
|          | and MAP      |           |    |       |       |
|          | kinases      |           |    |       |       |
|          | upon         |           |    |       |       |
|          | TLR7/8 or    | experimen |    |       |       |
|          | 9            | tal       |    |       |       |
| Reactome | activation   | (strong)  | 5  | 1.497 | 0.050 |
|          | Toll Like    |           |    |       |       |
|          | Receptor     |           |    |       |       |
|          | 7/8          | experimen |    |       |       |
|          | (TLR7/8)     | tal       |    |       |       |
| Reactome | Cascade      | (strong)  | 5  | 1.523 | 0.050 |
|          | Toll Like    |           |    |       |       |
|          | Receptor     | experimen |    |       |       |
|          | 9 (TLR9)     | tal       |    |       |       |
| Reactome | Cascade      | (strong)  | 5  | 1.523 | 0.050 |
|          | Transcripti  |           |    |       |       |
|          | onal         |           |    |       |       |
|          | regulation   | experimen |    |       |       |
|          | by           | tal       |    |       |       |
| Reactome | RUNX3        | (strong)  | 4  | 1.007 | 0.050 |

|              |                                                       |                    |    |       |          |
|--------------|-------------------------------------------------------|--------------------|----|-------|----------|
| WikiPathways | Regulation of toll-like receptor signaling pathway    | experimental (any) | 17 | 1.594 | 4.99e-11 |
| WikiPathways | Toll-like Receptor Signaling Pathway                  | experimental (any) | 15 | 1.156 | 4.99e-11 |
| WikiPathways | Hepatitis C and Hepatocellular Carcinoma              | experimental (any) | 11 | 0.651 | 2.27e-9  |
| WikiPathways | Photodynamic therapy-induced NF-kB survival signaling | experimental (any) | 9  | 0.452 | 1.84e-8  |
| WikiPathways | Viral Acute Myocarditis                               | experimental (any) | 12 | 1.036 | 1.84e-8  |
| WikiPathways | Non-genomic actions of 1,25 dihydroxy vitamin D3      | experimental (any) | 11 | 0.877 | 3.06e-8  |
| WikiPathways | Spinal Cord Injury                                    | experimental (any) | 13 | 1.369 | 3.06e-8  |
| WikiPathways | LTF danger signal response pathway                    | experimental (any) | 7  | 0.252 | 7.60e-8  |
| WikiPathways | Fibrin Complement Receptor 3 Signaling Pathway        | experimental (any) | 8  | 0.438 | 2.06e-7  |

|              |                                                                    |                       |    |       |         |
|--------------|--------------------------------------------------------------------|-----------------------|----|-------|---------|
| WikiPathways | miRNAs involvement in the immune response in sepsis                | experimental (any)    | 8  | 0.465 | 3.07e-7 |
| WikiPathways | Platelet-mediated interactions with vascular and circulating cells | experimental (any)    | 6  | 0.213 | 6.40e-7 |
| WikiPathways | TLR4 Signaling and Tolerance                                       | experimental (any)    | 7  | 0.345 | 6.40e-7 |
| WikiPathways | VEGFA-VEGFR2 Signaling Pathway                                     | experimental (any)    | 16 | 3.043 | 1.12e-6 |
| WikiPathways | Hepatitis C and Hepatocellular Carcinoma                           | experimental (strong) | 11 | 1.161 | 1.48e-6 |
| WikiPathways | LTF danger signal response pathway                                 | experimental (strong) | 7  | 0.387 | 2.97e-6 |
| WikiPathways | Pancreatic adenocarcinoma pathway                                  | experimental (any)    | 10 | 1.156 | 3.15e-6 |
| WikiPathways | Signal transduction through IL1R                                   | experimental (any)    | 7  | 0.438 | 3.15e-6 |
| WikiPathways | Apoptosis Modulation and Signaling                                 | experimental (any)    | 10 | 1.169 | 3.30e-6 |

|              |                                                                 |                       |    |       |         |
|--------------|-----------------------------------------------------------------|-----------------------|----|-------|---------|
| WikiPathways | Regulation of toll-like receptor signaling pathway              | experimental (strong) | 13 | 2.117 | 3.85e-6 |
| WikiPathways | Viral Acute Myocarditis                                         | experimental (strong) | 11 | 1.394 | 3.85e-6 |
| WikiPathways | Toll-like Receptor Signaling Pathway                            | experimental (strong) | 12 | 1.833 | 4.96e-6 |
| WikiPathways | Chromosomal and microsatellite instability in colorectal cancer | experimental (any)    | 9  | 0.957 | 5.50e-6 |
| WikiPathways | Spinal Cord Injury                                              | experimental (strong) | 12 | 1.91  | 6.67e-6 |
| WikiPathways | Hair Follicle Development: Cytodifferentiation (Part 3 of 3)    | experimental (any)    | 9  | 1.01  | 7.87e-6 |
| WikiPathways | socs1                                                           | experimental (any)    | 8  | 0.744 | 7.87e-6 |
| WikiPathways | PDGF Pathway                                                    | experimental (any)    | 7  | 0.531 | 8.88e-6 |
| WikiPathways | Photodynamic therapy-induced NF-kB survival signaling           | experimental (strong) | 8  | 0.749 | 1.01e-5 |



|              |                                                                           |                       |   |       |         |
|--------------|---------------------------------------------------------------------------|-----------------------|---|-------|---------|
| WikiPathways | Platelet-mediated interactions with vascular and circulating cells        | experimental (strong) | 6 | 0.361 | 1.47e-5 |
| WikiPathways | Interactions between immune cells and microRNAs in tumor microenvironment | experimental (any)    | 6 | 0.372 | 1.51e-5 |
| WikiPathways | Toll-like Receptor Signaling                                              | experimental (any)    | 6 | 0.385 | 1.79e-5 |
| WikiPathways | ApoE and miR-146 in inflammation and atherosclerosis                      | experimental (any)    | 4 | 0.106 | 1.85e-5 |
| WikiPathways | Simplified Depiction of MYD88 Distinct Input-Output Pathway               | experimental (any)    | 5 | 0.226 | 1.87e-5 |
| WikiPathways | Apoptosis Modulation by HSP70                                             | experimental (any)    | 5 | 0.239 | 2.46e-5 |
| WikiPathways | Photodynamic therapy-induced AP-1 survival signaling.                     | experimental (any)    | 7 | 0.651 | 2.74e-5 |

|                  |                                                                  |                              |    |       |         |  |
|------------------|------------------------------------------------------------------|------------------------------|----|-------|---------|--|
|                  | Structural<br>Pathway<br>of                                      |                              |    |       |         |  |
| WikiPath<br>ways | Interleukin<br>1 (IL-1)                                          | experimen<br>tal (any)       | 7  | 0.651 | 2.74e-5 |  |
|                  | Integrated<br>Breast                                             |                              |    |       |         |  |
| WikiPath<br>ways | Cancer<br>Pathway                                                | experimen<br>tal (any)       | 11 | 1.966 | 3.39e-5 |  |
|                  | Interleukin-<br>1 Induced<br>Activation                          |                              |    |       |         |  |
| WikiPath<br>ways | of NF-<br>kappa-B                                                | experimen<br>tal (any)       | 4  | 0.133 | 4.32e-5 |  |
| WikiPath<br>ways | Allograft<br>Rejection                                           | experimen<br>tal (any)       | 8  | 0.997 | 4.51e-5 |  |
|                  | RANKL/R<br>ANK<br>(Receptor<br>activator<br>of NFkB<br>(ligand)) |                              |    |       |         |  |
| WikiPath<br>ways | Signaling<br>Pathway                                             | experimen<br>tal (any)       | 7  | 0.718 | 4.51e-5 |  |
|                  | TGF-beta                                                         |                              |    |       |         |  |
| WikiPath<br>ways | Receptor<br>Signaling                                            | experimen<br>tal (any)       | 7  | 0.718 | 4.51e-5 |  |
|                  | Simplified<br>Depiction<br>of MYD88<br>Distinct                  |                              |    |       |         |  |
| WikiPath<br>ways | Input-<br>Output<br>Pathway                                      | experimen<br>tal<br>(strong) | 5  | 0.258 | 4.85e-5 |  |
|                  | TGF-beta                                                         |                              |    |       |         |  |
| WikiPath<br>ways | Signaling<br>Pathway                                             | experimen<br>tal (any)       | 10 | 1.701 | 5.07e-5 |  |
|                  | Distinct                                                         |                              |    |       |         |  |
| WikiPath<br>ways | Allograft<br>Rejection                                           | experimen<br>tal<br>(strong) | 8  | 0.981 | 6.68e-5 |  |
|                  | EBV                                                              |                              |    |       |         |  |
| WikiPath<br>ways | LMP1<br>signaling                                                | experimen<br>tal (any)       | 5  | 0.306 | 6.74e-5 |  |

|              |                                                                     |                       |   |       |         |
|--------------|---------------------------------------------------------------------|-----------------------|---|-------|---------|
| WikiPathways | T-Cell antigen Receptor (TCR) Signaling Pathway                     | experimental (any)    | 8 | 1.076 | 7.10e-5 |
| WikiPathways | DNA Damage Response (only ATM dependent)                            | experimental (any)    | 9 | 1.422 | 7.33e-5 |
| WikiPathways | TNF related weak inducer of apoptosis (TWEAK) Signaling Pathway     | experimental (any)    | 6 | 0.545 | 8.84e-5 |
| WikiPathways | Fibrin Complement Receptor 3 Signaling Pathway                      | experimental (strong) | 7 | 0.749 | 9.82e-5 |
| WikiPathways | Envelope proteins and their potential roles in EDMD physiopathology | experimental (any)    | 6 | 0.558 | 9.93e-5 |
| WikiPathways | AGE/RAGE pathway                                                    | experimental (any)    | 7 | 0.877 | 1.42e-4 |

|              |                                                                                            |                       |    |       |         |
|--------------|--------------------------------------------------------------------------------------------|-----------------------|----|-------|---------|
| WikiPathways | Mammary gland development pathway - Embryonic development (Stage 1 of 4)                   | experimental (any)    | 4  | 0.186 | 1.43e-4 |
| WikiPathways | Interactions between immune cells and microRNAs in tumor microenvironment                  | experimental (strong) | 6  | 0.542 | 1.52e-4 |
| WikiPathways | Pancreatic adenocarcinoma pathway                                                          | experimental (strong) | 10 | 1.858 | 1.52e-4 |
| WikiPathways | Non-genomic actions of 1,25 dihydroxy vitamin D3 miRNAs involvement in the immune response | experimental (strong) | 8  | 1.161 | 1.82e-4 |
| WikiPathways | in sepsis                                                                                  | experimental (strong) | 7  | 0.852 | 1.82e-4 |
| WikiPathways | Human Complement System                                                                    | experimental (any)    | 7  | 0.930 | 1.99e-4 |

|              |                                                                   |                       |    |       |         |
|--------------|-------------------------------------------------------------------|-----------------------|----|-------|---------|
| WikiPathways | Cells and Molecules involved in local acute inflammatory response | experimental (any)    | 4  | 0.213 | 2.43e-4 |
| WikiPathways | Endoderm Differentiation                                          | experimental (any)    | 9  | 1.741 | 3.08e-4 |
| WikiPathways | Leptin signaling pathway                                          | experimental (any)    | 7  | 1.01  | 3.16e-4 |
| WikiPathways | ApoE and miR-146 in inflammation and atherosclerosis              | experimental (strong) | 4  | 0.206 | 3.18e-4 |
| WikiPathways | TLR4 Signaling and Tolerance                                      | experimental (strong) | 6  | 0.645 | 3.25e-4 |
| WikiPathways | Integrated Breast Cancer Pathway                                  | experimental (strong) | 11 | 2.555 | 3.39e-4 |
| WikiPathways | Extracellular vesicles in the crosstalk of cardiac cells          | experimental (any)    | 4  | 0.239 | 3.73e-4 |
| WikiPathways | IL-1 signaling pathway                                            | experimental (any)    | 6  | 0.731 | 3.93e-4 |
| WikiPathways | VEGFA-VEGFR2 Signaling Pathway                                    | experimental (strong) | 14 | 4.156 | 4.10e-4 |

|              |                                                                                                                  |                       |    |       |         |
|--------------|------------------------------------------------------------------------------------------------------------------|-----------------------|----|-------|---------|
| WikiPathways | Signal transduction through IL1R BMP Signaling Pathway in Eyelid                                                 | experimental (strong) | 6  | 0.697 | 4.44e-4 |
| WikiPathways | Development Chemokine                                                                                            | experimental (any)    | 4  | 0.252 | 4.48e-4 |
| WikiPathways | signaling pathway                                                                                                | experimental (any)    | 9  | 1.953 | 6.62e-4 |
| WikiPathways | Focal Adhesion Androgen receptor                                                                                 | experimental (any)    | 10 | 2.405 | 6.62e-4 |
| WikiPathways | signaling pathway                                                                                                | experimental (any)    | 7  | 1.169 | 6.96e-4 |
| WikiPathways | Association Between Physico-Chemical Features and Toxicity Associated Pathways IL1 and megakaryocytes in obesity | experimental (any)    | 6  | 0.824 | 6.96e-4 |
| WikiPathways | The human immune response to tuberculosis                                                                        | experimental (any)    | 4  | 0.292 | 7.13e-4 |
| WikiPathways | Vitamin D in inflammatory diseases                                                                               | experimental (any)    | 4  | 0.292 | 7.13e-4 |

|              |                                                                 |                       |   |       |         |
|--------------|-----------------------------------------------------------------|-----------------------|---|-------|---------|
| WikiPathways | IL-2 Signaling Pathway                                          | experimental (any)    | 5 | 0.545 | 7.56e-4 |
| WikiPathways | Oncostatin M Signaling Pathway                                  | experimental (any)    | 6 | 0.850 | 7.56e-4 |
| WikiPathways | RAC1/PAK1/p38/MAPK                                              | experimental (any)    | 6 | 0.864 | 8.09e-4 |
| WikiPathways | Vitamin B12 Metabolism                                          | experimental (any)    | 5 | 0.571 | 9.11e-4 |
| WikiPathways | Physiological and Pathological Hypertrophy of the Heart         | experimental (any)    | 4 | 0.319 | 9.29e-4 |
| WikiPathways | Apoptosis Modulation by HSP70                                   | experimental (strong) | 4 | 0.310 | 0.001   |
| WikiPathways | EBV LMP1 signaling                                              | experimental (strong) | 5 | 0.542 | 0.001   |
| WikiPathways | Hair Follicle Development: Cytodifferentiation (Part 3 of 3)    | experimental (strong) | 7 | 1.239 | 0.001   |
| WikiPathways | PDGF Pathway                                                    | experimental (strong) | 6 | 0.878 | 0.001   |
| WikiPathways | Chromosomal and microsatellite instability in colorectal cancer | experimental (strong) | 7 | 1.42  | 0.002   |

|              |                                                                 |                       |   |       |       |
|--------------|-----------------------------------------------------------------|-----------------------|---|-------|-------|
| WikiPathways | Envelope proteins and their potential roles in EDMD             | experimental (strong) | 5 | 0.645 | 0.002 |
| WikiPathways | Human Complement System                                         | experimental (strong) | 5 | 0.645 | 0.002 |
| WikiPathways | Interleukin-1 Induced Activation of NF-kappa-B                  | experimental (strong) | 3 | 0.155 | 0.002 |
| WikiPathways | Nonalcoholic fatty liver disease                                | experimental (strong) | 8 | 1.833 | 0.002 |
| WikiPathways | TNF related weak inducer of apoptosis (TWEAK) Signaling Pathway | experimental (strong) | 6 | 0.955 | 0.002 |
| WikiPathways | Toll-like Receptor Signaling                                    | experimental (strong) | 5 | 0.594 | 0.002 |
| WikiPathways | Vitamin B12 Metabolism                                          | experimental (strong) | 5 | 0.645 | 0.002 |
| WikiPathways | socs1                                                           | experimental (strong) | 6 | 0.955 | 0.002 |
| WikiPathways | Apoptosis                                                       | experimental (any)    | 6 | 1.063 | 0.002 |



|              |                                                                   |                       |    |       |       |
|--------------|-------------------------------------------------------------------|-----------------------|----|-------|-------|
| WikiPathways | Control of immune tolerance by vasoactive intestinal peptide      | experimental (any)    | 3  | 0.173 | 0.002 |
| WikiPathways | Extracellular vesicle-mediated signaling in recipient cells       | experimental (any)    | 4  | 0.372 | 0.002 |
| WikiPathways | MicroRNAs in cardiomyocyte hypertrophy                            | experimental (any)    | 6  | 1.063 | 0.002 |
| WikiPathways | Nonalcoholic fatty liver disease                                  | experimental (any)    | 8  | 1.887 | 0.002 |
| WikiPathways | PI3K-Akt Signaling Pathway                                        | experimental (any)    | 12 | 3.867 | 0.002 |
| WikiPathways | AGE/RAGE pathway                                                  | experimental (strong) | 7  | 1.497 | 0.003 |
| WikiPathways | Androgen receptor signaling pathway                               | experimental (strong) | 7  | 1.445 | 0.003 |
| WikiPathways | Cells and Molecules involved in local acute inflammatory response | experimental (strong) | 3  | 0.181 | 0.003 |

|              |                                                   |                       |    |       |       |
|--------------|---------------------------------------------------|-----------------------|----|-------|-------|
| WikiPathways | IL1 and megakaryocytes in obesity                 | experimental (strong) | 4  | 0.413 | 0.003 |
| WikiPathways | TGF-beta Signaling Pathway                        | experimental (strong) | 9  | 2.478 | 0.003 |
| WikiPathways | Alpha 6 Beta 4 signaling pathway                  | experimental (any)    | 4  | 0.438 | 0.003 |
| WikiPathways | Breast cancer pathway                             | experimental (any)    | 8  | 1.966 | 0.003 |
| WikiPathways | Corticotropin-releasing hormone signaling pathway | experimental (any)    | 6  | 1.143 | 0.003 |
| WikiPathways | Ebola Virus Pathway                               | experimental (any)    | 7  | 1.568 | 0.003 |
| WikiPathways | Lung fibrosis                                     | experimental (any)    | 5  | 0.744 | 0.003 |
| WikiPathways | MAPK Signaling Pathway                            | experimental (any)    | 10 | 3.069 | 0.003 |
| WikiPathways | Notch Signaling Pathway                           | experimental (any)    | 5  | 0.731 | 0.003 |
| WikiPathways | T-Cell antigen Receptor (TCR) pathway             | experimental (any)    | 5  | 0.731 | 0.003 |
| WikiPathways | during Staphylococcus aureus infection            | experimental (any)    | 5  | 0.757 | 0.003 |
| WikiPathways | TNF alpha Signaling Pathway                       | experimental (any)    | 6  | 1.156 | 0.003 |

|              |                                                                        |                       |   |       |       |
|--------------|------------------------------------------------------------------------|-----------------------|---|-------|-------|
|              | Amplification and Expansion of Oncogenic Pathways as                   |                       |   |       |       |
| WikiPathways | Metastatic Traits Canonical and Non-Canonical                          | experimental (any)    | 3 | 0.226 | 0.004 |
| WikiPathways | TGF-B signaling                                                        | experimental (any)    | 3 | 0.226 | 0.004 |
| WikiPathways | Overview of nanoparticle effects                                       | experimental (any)    | 3 | 0.239 | 0.004 |
| WikiPathways | TGF-B Signaling in Thyroid Cells for Epithelial-Mesenchymal Transition | experimental (any)    | 3 | 0.226 | 0.004 |
| WikiPathways | Leptin signaling pathway                                               | experimental (strong) | 7 | 1.652 | 0.005 |
| WikiPathways | Photodynamic therapy-induced AP-1 survival signaling.                  | experimental (strong) | 6 | 1.187 | 0.005 |
| WikiPathways | DNA Damage Response                                                    | experimental (any)    | 5 | 0.864 | 0.005 |
| WikiPathways | Nanomaterial induced apoptosis                                         | experimental (any)    | 3 | 0.252 | 0.005 |

|              |                                                              |                       |     |       |       |
|--------------|--------------------------------------------------------------|-----------------------|-----|-------|-------|
| WikiPathways | Notch Signaling                                              | experimental (any)    | 4   | 0.518 | 0.005 |
| WikiPathways | miRNA Regulation of DNA Damage Response                      | experimental (any)    | 5   | 0.890 | 0.005 |
| WikiPathways | VEGFA-VEGFR2 Signaling Pathway                               | predicted (union)     | 113 | 82.39 | 0.006 |
| WikiPathways | Chemokine signaling pathway                                  | experimental (strong) | 8   | 2.168 | 0.006 |
| WikiPathways | Control of immune tolerance by vasoactive intestinal peptide | experimental (strong) | 3   | 0.232 | 0.006 |
| WikiPathways | Vitamin D in inflammatory diseases                           | experimental (strong) | 4   | 0.516 | 0.006 |
| WikiPathways | Brain-Derived Neurotrophic Factor (BDNF) signaling pathway   | experimental (any)    | 7   | 1.794 | 0.006 |
| WikiPathways | EV release from cardiac cells and their functional effects   | experimental (any)    | 2   | 0.080 | 0.006 |

|              |                                                                                        |                    |    |       |       |
|--------------|----------------------------------------------------------------------------------------|--------------------|----|-------|-------|
| WikiPathways | Fas Ligand (FasL) pathway and Stress induction of Heat Shock Proteins (HSP) regulation | experimental (any) | 4  | 0.558 | 0.006 |
| WikiPathways | IL-3 Signaling Pathway                                                                 | experimental (any) | 4  | 0.585 | 0.006 |
| WikiPathways | IL-6 signaling pathway                                                                 | experimental (any) | 4  | 0.558 | 0.006 |
| WikiPathways | Interleukin-11 Signaling Pathway                                                       | experimental (any) | 4  | 0.585 | 0.006 |
| WikiPathways | Primary Focal Segmental Glomerulosclerosis (FSGS)                                      | experimental (any) | 5  | 0.957 | 0.006 |
| WikiPathways | Regulation of Actin Cytoskeleton                                                       | experimental (any) | 7  | 1.807 | 0.006 |
| WikiPathways | Senescence and Autophagy in Cancer                                                     | experimental (any) | 6  | 1.382 | 0.006 |
| WikiPathways | T-Cell antigen Receptor (TCR) Signaling Pathway                                        | predicted (union)  | 51 | 32.41 | 0.007 |
| WikiPathways | Prolactin Signaling Pathway                                                            | experimental (any) | 5  | 0.983 | 0.007 |

|              |                                                           |                          |    |       |       |
|--------------|-----------------------------------------------------------|--------------------------|----|-------|-------|
| WikiPathways | Thymic Stromal Lymphopoietin (TSLP) Signaling Pathway     | experimental (any)       | 4  | 0.598 | 0.007 |
| WikiPathways | Phosphodiesterases in neuronal function                   | predicted (intersection) | 21 | 8.41  | 0.008 |
| WikiPathways | Epithelial to mesenchymal transition in colorectal cancer | experimental (any)       | 7  | 1.966 | 0.008 |
| WikiPathways | Hematopoietic Stem Cell Differentiation                   | experimental (any)       | 4  | 0.638 | 0.008 |
| WikiPathways | DNA Damage Response (only ATM dependent)                  | experimental (strong)    | 8  | 2.375 | 0.009 |
| WikiPathways | Endoderm Differentiation                                  | experimental (strong)    | 7  | 1.858 | 0.009 |
| WikiPathways | Cardiac Progenitor Differentiation                        | experimental (any)       | 4  | 0.664 | 0.009 |
| WikiPathways | Cell Cycle                                                | experimental (any)       | 6  | 1.528 | 0.009 |

|              |                                                           |                          |    |       |       |
|--------------|-----------------------------------------------------------|--------------------------|----|-------|-------|
|              | Selective expression of chemokine receptors during T-cell |                          |    |       |       |
| WikiPathways | polarization                                              | experimental (any)       | 3  | 0.332 | 0.009 |
|              | Signaling Pathways in                                     |                          |    |       |       |
| WikiPathways | Glioblastoma                                              | experimental (any)       | 5  | 1.063 | 0.009 |
|              | Vitamin D Receptor Pathway                                |                          |    |       |       |
| WikiPathways | Apoptosis-related network due to altered Notch3 in        | experimental (any)       | 7  | 2.046 | 0.009 |
|              | ovarian cancer                                            |                          |    |       |       |
| WikiPathways | EGF/EGFR                                                  | experimental (any)       | 4  | 0.678 | 0.010 |
|              | Signaling Pathway                                         |                          |    |       |       |
| WikiPathways | TFs Regulate miRNAs related to cardiac                    | experimental (any)       | 7  | 2.086 | 0.010 |
|              | hypertrophy                                               |                          |    |       |       |
| WikiPathways | VEGFA-VEGFR2                                              | experimental (any)       | 2  | 0.106 | 0.010 |
|              | Signaling Pathway                                         |                          |    |       |       |
| WikiPathways | predicted (intersection)                                  | predicted (intersection) | 61 | 37.75 | 0.011 |
|              | Apoptosis Modulation and Signaling                        |                          |    |       |       |
| WikiPathways | experimental (strong)                                     | experimental (strong)    | 6  | 1.445 | 0.011 |

|              |                                                                            |                       |   |       |       |
|--------------|----------------------------------------------------------------------------|-----------------------|---|-------|-------|
| WikiPathways | Notch Signaling Pathway                                                    | experimental (strong) | 5 | 0.981 | 0.011 |
| WikiPathways | Primary Focal Segmental Glomerulosclerosis                                 | experimental (strong) | 5 | 0.981 | 0.011 |
| WikiPathways | IL-4 Signaling Pathway                                                     | experimental (any)    | 4 | 0.704 | 0.011 |
| WikiPathways | Nanomaterial induced apoptosis                                             | experimental (strong) | 3 | 0.310 | 0.012 |
| WikiPathways | RAC1/PAK1/p38/MAPK2 Pathway                                                | experimental (strong) | 6 | 1.471 | 0.012 |
| WikiPathways | Mammary gland development pathway - Pregnancy and lactation (Stage 3 of 4) | experimental (any)    | 3 | 0.372 | 0.012 |
| WikiPathways | Pathways Regulating Hippo Signaling                                        | experimental (any)    | 5 | 1.169 | 0.012 |
| WikiPathways | Role of Altered Glycolysation of MUC1 in Tumour Microenvironment           | experimental (any)    | 2 | 0.120 | 0.012 |



|              |                                                                          |                       |   |       |       |
|--------------|--------------------------------------------------------------------------|-----------------------|---|-------|-------|
| WikiPathways | Extracellular vesicle-mediated signaling in recipient cells              | experimental (strong) | 4 | 0.645 | 0.013 |
| WikiPathways | Inflammatory Response Pathway                                            | experimental (any)    | 3 | 0.385 | 0.013 |
| WikiPathways | Integrin-mediated Cell Adhesion                                          | experimental (any)    | 5 | 1.196 | 0.013 |
| WikiPathways | PDGFR-beta pathway                                                       | experimental (any)    | 3 | 0.385 | 0.013 |
| WikiPathways | Ebola Virus Pathway on Host                                              | experimental (strong) | 6 | 1.523 | 0.014 |
| WikiPathways | Mammary gland development pathway - Embryonic development (Stage 1 of 4) | experimental (strong) | 3 | 0.336 | 0.014 |
| WikiPathways | Notch Signaling                                                          | experimental (strong) | 4 | 0.671 | 0.014 |
| WikiPathways | Overview of nanoparticle effects                                         | experimental (strong) | 3 | 0.336 | 0.014 |
| WikiPathways | T-Cell antigen Receptor (TCR) Signaling Pathway                          | experimental (strong) | 6 | 1.574 | 0.014 |

|              |                                                                    |                       |                       |       |       |       |
|--------------|--------------------------------------------------------------------|-----------------------|-----------------------|-------|-------|-------|
| WikiPathways | TGF-beta Receptor Signaling                                        | experimental (strong) | 5                     | 1.084 | 0.014 |       |
| WikiPathways | TNF alpha Signaling Pathway                                        | experimental (strong) | 6                     | 1.574 | 0.014 |       |
| WikiPathways | Gene regulatory network modelling                                  | somitogenesis         | experimental (any)    | 2     | 0.133 | 0.014 |
| WikiPathways | Alpha 6 Beta 4 signaling pathway                                   | experimental (strong) | 4                     | 0.697 | 0.015 |       |
| WikiPathways | Folate Metabolism                                                  | experimental (any)    | 4                     | 0.784 | 0.015 |       |
| WikiPathways | Resistin as a regulator of inflammation                            | experimental (any)    | 3                     | 0.412 | 0.015 |       |
| WikiPathways | RANKL/RANK (Receptor activator of NFkB (ligand)) Signaling Pathway | predicted (union)     | 33                    | 19.52 | 0.016 |       |
| WikiPathways | Association Between Physico-Chemical Features and Toxicity         | Associated Pathways   | experimental (strong) | 5     | 1.136 | 0.016 |

|              |                                                                    |                       |    |       |       |
|--------------|--------------------------------------------------------------------|-----------------------|----|-------|-------|
| WikiPathways | PI3K-Akt Signaling Pathway                                         | experimental (strong) | 11 | 4.569 | 0.016 |
| WikiPathways | Endometrial cancer                                                 | experimental (any)    | 4  | 0.811 | 0.016 |
| WikiPathways | RANKL/RANK (Receptor activator of NFkB (ligand)) Signaling Pathway | experimental (strong) | 5  | 1.161 | 0.017 |
| WikiPathways | Melatonin metabolism and effects                                   | experimental (any)    | 3  | 0.438 | 0.017 |
| WikiPathways | miRNA regulation of prostate cancer signaling pathways             | experimental (any)    | 3  | 0.438 | 0.017 |
| WikiPathways | Extracellular vesicles in the crosstalk of cardiac cells           | experimental (strong) | 3  | 0.387 | 0.018 |
| WikiPathways | Inflammatory Response Pathway                                      | experimental (strong) | 3  | 0.387 | 0.018 |
| WikiPathways | IL-10 Anti-inflammatory Signaling Pathway                          | experimental (any)    | 2  | 0.159 | 0.018 |

|              |                                                                                    |                    |   |       |       |
|--------------|------------------------------------------------------------------------------------|--------------------|---|-------|-------|
| WikiPathways | MAPK and NFkB Signalling Pathways Inhibited by Yersinia YopJ Mesodermal Commitment | experimental (any) | 2 | 0.159 | 0.018 |
| WikiPathways | ent Pathway                                                                        | experimental (any) | 6 | 1.834 | 0.018 |
| WikiPathways | Non-small cell lung cancer                                                         | experimental (any) | 4 | 0.850 | 0.018 |
| WikiPathways | Pathways Affected in Adenoid Cystic Carcinoma                                      | experimental (any) | 4 | 0.837 | 0.018 |
| WikiPathways | Wnt Signaling Pathway and Pluripotency                                             | experimental (any) | 5 | 1.315 | 0.018 |
| WikiPathways | Neural Crest Cell Migration during Development                                     | experimental (any) | 3 | 0.465 | 0.019 |
| WikiPathways | Type II interferon signaling (IFNG)                                                | experimental (any) | 3 | 0.465 | 0.019 |

|              |                                                                                        |                       |   |       |       |
|--------------|----------------------------------------------------------------------------------------|-----------------------|---|-------|-------|
| WikiPathways | BMP Signaling Pathway in Eyelid Development                                            | experimental (strong) | 3 | 0.413 | 0.020 |
| WikiPathways | Canonical and Non-Canonical TGF-B signaling                                            | experimental (strong) | 3 | 0.413 | 0.020 |
| WikiPathways | Fas Ligand (FasL) pathway and Stress induction of Heat Shock Proteins (HSP) regulation | experimental (strong) | 4 | 0.774 | 0.020 |
| WikiPathways | Focal Adhesion                                                                         | experimental (strong) | 8 | 2.891 | 0.020 |
| WikiPathways | Folate Metabolism                                                                      | experimental (strong) | 4 | 0.800 | 0.020 |
| WikiPathways | Hedgehog Signaling Pathway                                                             | experimental (strong) | 3 | 0.413 | 0.020 |
| WikiPathways | Selective expression of chemokine receptors during T-cell polarization                 | experimental (strong) | 3 | 0.413 | 0.020 |
| WikiPathways | Selenium Micronutrient Network                                                         | experimental (strong) | 4 | 0.800 | 0.020 |

|              |                                                                        |                       |   |       |       |
|--------------|------------------------------------------------------------------------|-----------------------|---|-------|-------|
| WikiPathways | TGF-B Signaling in Thyroid Cells for Epithelial-Mesenchymal Transition | experimental (strong) | 3 | 0.413 | 0.020 |
| WikiPathways | Signaling Pathway                                                      | experimental (any)    | 3 | 0.478 | 0.020 |
| WikiPathways | Photodynamic therapy-induced HIF-1 survival signaling                  | experimental (any)    | 3 | 0.478 | 0.020 |
| WikiPathways | Osteopontin Signaling                                                  | experimental (any)    | 2 | 0.173 | 0.021 |
| WikiPathways | Selenium Micronutrient Network                                         | experimental (any)    | 4 | 0.904 | 0.021 |
| WikiPathways | Cell Cycle EV release from cardiac cells and their functional effects  | experimental (strong) | 6 | 1.858 | 0.023 |
| WikiPathways | Eicosanoid Synthesis                                                   | experimental (strong) | 2 | 0.155 | 0.023 |
| WikiPathways | IL-6 signaling pathway                                                 | experimental (strong) | 4 | 0.852 | 0.023 |

|              |                                                                                                            |                       |   |       |       |
|--------------|------------------------------------------------------------------------------------------------------------|-----------------------|---|-------|-------|
| WikiPathways | Physiological and Pathological Hypertrophy of the Heart TFs Regulate miRNAs related to cardiac hypertrophy | experimental (strong) | 3 | 0.439 | 0.023 |
| WikiPathways | Thymic Stromal Lymphopoietin (TSLP) Signaling Pathway                                                      | experimental (strong) | 2 | 0.155 | 0.023 |
| WikiPathways | Bladder Cancer                                                                                             | experimental (any)    | 4 | 0.852 | 0.023 |
| WikiPathways | ERK Pathway in Huntington's Disease                                                                        | experimental (any)    | 3 | 0.518 | 0.023 |
| WikiPathways | H19 action Rb-E2F1 signaling and CDK-Beta-catenin activity                                                 | experimental (any)    | 2 | 0.186 | 0.023 |
| WikiPathways | IL-5 Signaling Pathway                                                                                     | experimental (any)    | 3 | 0.518 | 0.023 |
| WikiPathways | Neural Crest Cell Migration in Cancer                                                                      | experimental (any)    | 3 | 0.505 | 0.023 |

|              |                                                                                   |   |       |       |
|--------------|-----------------------------------------------------------------------------------|---|-------|-------|
| WikiPathways | ncRNAs involved in STAT3 signaling in hepatocellular carcinoma experimental (any) | 2 | 0.186 | 0.023 |
| WikiPathways | Corticotropin-releasing hormone signaling pathway experimental (strong)           | 5 | 1.342 | 0.024 |
| WikiPathways | Cardiac Progenitor Differentiation experimental (strong)                          | 4 | 0.878 | 0.025 |
| WikiPathways | Wnt Signaling experimental (any)                                                  | 5 | 1.475 | 0.025 |
| WikiPathways | Regulation of Actin Cytoskeleton experimental (strong)                            | 6 | 1.91  | 0.026 |
| WikiPathways | Melatonin metabolism and effects experimental (strong)                            | 3 | 0.490 | 0.027 |
| WikiPathways | Gene regulatory network modelling somitogenesis experimental (strong)             | 2 | 0.181 | 0.028 |
| WikiPathways | Pathways Regulating Hippo Signaling experimental (strong)                         | 5 | 1.42  | 0.028 |
| WikiPathways | Hedgehog Signaling Pathway experimental (any)                                     | 3 | 0.558 | 0.028 |



|              |                                             |                       |    |       |       |
|--------------|---------------------------------------------|-----------------------|----|-------|-------|
| WikiPathways | Structural Pathway of Interleukin 1 (IL-1)  | experimental (strong) | 4  | 0.929 | 0.029 |
| WikiPathways | Integrated Cancer Pathway                   | experimental (any)    | 3  | 0.571 | 0.029 |
| WikiPathways | Role of Osx and miRNAs in tooth development | experimental (any)    | 2  | 0.213 | 0.029 |
| WikiPathways | Androgen receptor signaling pathway         | predicted (union)     | 47 | 31.24 | 0.030 |
| WikiPathways | MECP2 and Associated Rett Syndrome          | predicted (union)     | 35 | 21.87 | 0.030 |
| WikiPathways | G13 Signaling Pathway                       | experimental (strong) | 3  | 0.516 | 0.030 |
| WikiPathways | Aryl Hydrocarbon Receptor                   | experimental (any)    | 3  | 0.585 | 0.031 |
| WikiPathways | Adipogenesis                                | experimental (any)    | 5  | 1.581 | 0.032 |
| WikiPathways | Alzheimer's Disease Pathogenic              | experimental (strong) | 4  | 0.981 | 0.034 |
| WikiPathways | Escherichia coli infection                  | experimental (strong) | 3  | 0.542 | 0.034 |
| WikiPathways | Alzheimer's Disease                         | experimental (any)    | 4  | 1.076 | 0.034 |

|              |                                                                                          |                       |   |       |       |
|--------------|------------------------------------------------------------------------------------------|-----------------------|---|-------|-------|
| WikiPathways | Eicosanoid Synthesis Regulation of Microtubule                                           | experimental (any)    | 2 | 0.239 | 0.034 |
| WikiPathways | Cytoskeleton Differentiation                                                             | experimental (any)    | 3 | 0.611 | 0.034 |
| WikiPathways | Pathway                                                                                  | experimental (any)    | 3 | 0.624 | 0.035 |
| WikiPathways | ncRNAs involved in Wnt signaling in hepatocellular carcinoma                             | experimental (any)    | 4 | 1.09  | 0.035 |
| WikiPathways | Oncostatin M Signaling Pathway Epithelial to mesenchymal transition in colorectal cancer | experimental (strong) | 5 | 1.523 | 0.036 |
| WikiPathways | Lung fibrosis                                                                            | experimental (strong) | 7 | 2.762 | 0.039 |
| WikiPathways | Wnt Signaling Pathway Pathogenic Escherichia coli infection                              | experimental (any)    | 4 | 1.032 | 0.039 |
| WikiPathways | Retinoblastoma Gene in Cancer                                                            | experimental (any)    | 3 | 0.651 | 0.039 |
| WikiPathways | Gene in Cancer                                                                           | experimental (any)    | 3 | 0.664 | 0.041 |
| WikiPathways | Gene in Cancer                                                                           | experimental (any)    | 4 | 1.156 | 0.041 |

|              |                                                               |                       |   |       |       |
|--------------|---------------------------------------------------------------|-----------------------|---|-------|-------|
| WikiPathways | IL-10 Anti-inflammatory Signaling Pathway                     | experimental (strong) | 2 | 0.232 | 0.043 |
| WikiPathways | Role Altered Glycolysation of MUC1 in Tumour Microenvironment | experimental (strong) | 2 | 0.232 | 0.043 |
| WikiPathways | Cancer immunotherapy by PD-1 blockade                         | experimental (any)    | 2 | 0.279 | 0.043 |
| WikiPathways | Canonical and Non-canonical Notch signaling                   | experimental (any)    | 2 | 0.279 | 0.043 |
| WikiPathways | Cardiac Hypertrophic Response                                 | experimental (any)    | 3 | 0.678 | 0.043 |
| WikiPathways | ErbB Signaling Pathway                                        | experimental (any)    | 4 | 1.183 | 0.043 |
| WikiPathways | Myometrial Relaxation and Contraction                         | experimental (any)    | 5 | 1.754 | 0.043 |
| WikiPathways | Neovascularisation processes                                  | experimental (any)    | 2 | 0.279 | 0.043 |
| WikiPathways | Ciliary landscape                                             | experimental (strong) | 4 | 1.084 | 0.044 |

|              |                                                                            |                       |   |       |       |
|--------------|----------------------------------------------------------------------------|-----------------------|---|-------|-------|
| WikiPathways | MAPK Signaling Pathway                                                     | experimental (strong) | 8 | 3.51  | 0.044 |
| WikiPathways | Mammary gland development pathway - Pregnancy and lactation (Stage 3 of 4) | experimental (strong) | 3 | 0.619 | 0.044 |
| WikiPathways | Resistin as a regulator of inflammation                                    | experimental (strong) | 3 | 0.619 | 0.044 |
| WikiPathways | Breast cancer pathway                                                      | experimental (strong) | 7 | 2.891 | 0.045 |
| WikiPathways | IL-1 signaling pathway                                                     | experimental (strong) | 4 | 1.11  | 0.045 |
| WikiPathways | DNA Damage Response                                                        | experimental (strong) | 4 | 1.136 | 0.048 |
| WikiPathways | DNA IR-Double Strand Breaks (DSBs) and cellular response via ATM           | experimental (any)    | 3 | 0.731 | 0.050 |
| WikiPathways | Estrogen signaling pathway                                                 | experimental (any)    | 2 | 0.306 | 0.050 |

### Supplementary Table 1b

**Supplementary Table 1:** A) Pathways influenced by miR148-5p according to miRPathDB; B) Pathways influenced by miR146-5p according to miRPathDB.

| gene_id         | A2780M1   | A2780M2   | A2780M3   | A2780C1   | A2780C2   | A2780C3   | A2780M    | A2780C    |
|-----------------|-----------|-----------|-----------|-----------|-----------|-----------|-----------|-----------|
| ENSG00000106366 | 20.038570 | 9.7858848 | 20.990191 | 188.25315 |           | 128.75407 | 16.938215 | 142.68723 |
|                 | 93        | 64        | 55        | 75        | 111.05448 | 93        | 78        | 89        |
| ENSG00000125740 | 52.100284 | 18.484449 | 34.633816 | 217.36447 | 227.15689 | 204.97649 | 35.072849 | 216.49928 |
|                 | 42        | 19        | 06        | 05        | 09        | 42        | 89        | 52        |
| ENSG00000269466 | 19.036642 | 3.2619616 | 3.1485287 | 95.096955 | 15.143792 | 46.351468 | 8.4823775 | 52.197405 |
|                 | 38        | 21        | 33        | 85        | 72        | 55        | 79        | 71        |
| ENSG00000148677 | 38.073284 | 31.532295 | 40.930873 | 116.44525 |           | 237.93753 | 36.845484 | 192.16391 |
|                 | 77        | 67        | 52        | 21        | 222.10896 | 85        | 66        | 69        |
| ENSG00000163545 | 25.048213 | 42.405501 | 44.079402 | 155.26033 | 198.55194 | 202.91642 | 37.177705 | 185.57623 |
|                 | 66        | 08        | 26        | 61        | 91        | 9         | 67        | 8         |
| ENSG00000184216 | 1349.5977 | 1594.0119 | 1183.8468 | 5234.2140 | 4718.9740 | 4669.1379 | 1375.8188 | 4874.1086 |
|                 | 52        | 12        | 03        | 8         | 77        | 32        | 23        | 96        |
| ENSG00000126768 | 349.67306 | 339.24400 | 504.81410 | 1205.2083 | 1358.7347 | 1623.3314 | 397.91039 | 1395.7581 |
|                 | 27        | 86        | 68        | 59        | 36        | 32        | 27        | 76        |
| ENSG00000073756 | 186.35870 | 223.98803 | 282.31807 | 827.73166 | 829.54331 | 694.24199 | 230.88827 | 783.83899 |
|                 | 97        | 13        | 64        | 67        | 26        | 56        | 24        | 16        |
| ENSG00000126903 | 348.67113 | 384.91147 | 362.08080 | 1038.3034 | 1104.6555 | 1370.9734 | 365.22113 | 1171.3108 |
|                 | 42        | 13        | 43        | 98        | 47        | 36        | 66        | 27        |
| ENSG00000128564 | 1372.6421 | 1675.5609 | 1260.4610 | 4888.7598 | 4042.5513 | 4726.8197 | 1436.2213 | 4552.7103 |
|                 | 09        | 53        | 03        | 32        | 36        | 59        | 55        | 09        |
| ENSG00000183092 | 13.025071 | 21.746410 | 14.693134 | 75.689413 | 42.907412 | 32.961044 | 16.488205 | 50.519290 |
|                 | 1         | 81        | 09        | 84        | 72        | 3         | 33        | 29        |
| ENSG00000178878 | 11.021214 | 26.095692 | 13.643624 | 52.400363 | 42.907412 | 55.621762 | 16.920177 | 50.309846 |
|                 | 01        | 97        | 51        | 43        | 72        | 26        | 16        | 13        |
| ENSG00000139572 | 35.067499 | 27.183013 | 14.693134 | 127.11940 | 51.320630 | 50.471599 | 25.647882 | 76.303876 |
|                 | 13        | 51        | 09        | 02        | 9         | 08        | 24        | 72        |
| ENSG00000143257 | 14.026999 | 26.095692 | 18.891172 | 58.222626 | 53.003274 | 55.621762 | 19.671288 | 55.615887 |
|                 | 65        | 97        | 4         | 03        | 54        | 26        | 34        | 61        |
| ENSG00000177679 | 44.084856 |           | 30.435777 | 131.00090 | 70.671032 | 111.24352 | 38.250497 | 104.30515 |
|                 | 05        | 40.23086  | 75        | 86        | 71        | 45        | 93        | 53        |
| ENSG00000196747 | 16.030856 | 30.444975 | 27.287249 | 98.008087 | 35.335516 | 66.952121 | 24.587693 | 66.765241 |
|                 | 74        | 13        | 02        | 15        | 36        | 23        | 63        | 58        |
| ENSG00000174827 | 133.25649 | 102.20813 | 117.54507 | 370.68405 |           | 320.34014 | 117.66990 | 319.80195 |
|                 | 67        | 08        | 27        | 24        | 268.38166 | 93        | 01        | 39        |
| ENSG00000198959 | 36.069427 | 18.484449 | 20.990191 | 93.156201 | 43.748734 | 63.862023 | 25.181356 | 66.922319 |
|                 | 67        | 19        | 55        | 65        | 54        | 33        | 14        | 84        |
| ENSG00000135097 | 17.032785 | 33.706936 | 18.891172 | 68.896774 | 47.955343 | 65.922088 | 23.210298 | 60.924735 |
|                 | 29        | 75        | 4         | 14        | 63        | 6         | 15        | 45        |
| ENSG00000100065 | 87.167783 | 57.627988 | 91.307333 | 160.11222 | 211.17177 | 242.05766 | 78.701035 | 204.44722 |
|                 | 55        | 64        | 25        | 16        | 63        | 91        | 15        | 23        |
| ENSG00000111305 | 76.146569 | 109.81937 | 74.515180 | 257.14993 | 193.50401 | 220.42698 | 86.827041 | 223.69364 |
|                 | 53        | 46        | 01        | 16        | 81        | 38        | 38        | 45        |
| ENSG00000144867 | 547.05298 | 700.23442 | 709.46847 | 1590.4480 | 1668.3411 | 1773.7161 | 652.25196 | 1677.5018 |
|                 | 64        | 81        | 44        | 68        | 65        | 96        | 3         | 1         |

|          |           |           |           |           |           |           |           |           |
|----------|-----------|-----------|-----------|-----------|-----------|-----------|-----------|-----------|
| ENSG0000 | 576.27988 | 504.81410 | 1564.2478 | 1304.8901 | 1238.0992 | 532.69637 | 1369.0790 |           |
| 0126391  | 516.99513 | 64        | 68        | 86        | 4         | 26        | 44        | 84        |
| ENSG0000 | 79.152355 | 41.318180 | 27.287249 | 115.47487 | 112.73712 | 147.29466 | 49.252594 | 125.16888 |
| 0153832  | 17        | 54        | 02        | 5         | 36        | 67        | 91        | 84        |
| ENSG0000 | 23.044356 | 31.532295 | 17.841662 | 60.163380 | 53.844596 | 67.982153 | 24.139438 | 60.663376 |
| 0213123  | 57        | 67        | 82        | 23        | 35        | 87        | 35        | 82        |
| ENSG0000 | 29.055927 | 39.143539 | 25.188229 | 111.59336 | 67.305745 | 55.621762 | 31.129232 | 78.173624 |
| 0272405  | 85        | 46        | 86        | 66        | 44        | 26        | 39        | 75        |
| ENSG0000 | 57.109927 | 119.60525 | 116.49556 | 226.09786 | 211.17177 | 298.70946 | 97.736916 | 245.32636 |
| 0210195  | 15        | 94        | 31        | 44        | 63        | 4         | 57        | 82        |
| ENSG0000 | 160.30856 | 101.12081 | 55.624007 | 352.24688 | 190.98005 | 246.17779 | 105.68446 | 263.13491 |
| 0128342  | 74        | 03        | 61        | 75        | 27        | 96        | 18        | 33        |
| ENSG0000 | 54.104141 | 23.921051 | 29.386268 | 102.85997 | 81.608216 | 80.342545 | 35.803820 | 88.270244 |
| 0108932  | 51        | 89        | 17        | 27        | 35        | 48        | 52        | 83        |
| ENSG0000 | 1028.9806 | 936.18298 |           | 2612.2551 | 2484.4233 | 2212.5100 | 994.74580 | 2436.3961 |
| 0166881  | 17        | 53        | 1019.0738 | 55        | 29        | 99        | 08        | 94        |
| ENSG0000 | 244.47056 | 271.83013 | 255.03082 | 688.96774 | 567.89222 | 630.37997 | 257.11050 | 629.07998 |
| 0124641  | 53        | 51        | 73        | 14        | 72        | 22        | 93        | 02        |
| ENSG0000 | 126.24299 | 289.22726 | 207.80289 | 469.66251 | 468.61625 | 575.78824 | 207.75771 | 504.68900 |
| 0167264  | 69        | 38        | 64        | 66        | 26        | 26        | 9         | 4         |
| ENSG0000 | 116.22371 | 134.82774 | 116.49556 | 259.09068 | 319.70229 | 312.09988 | 122.51567 | 296.96428 |
| 0119878  | 14        | 7         | 31        | 58        | 09        | 82        | 38        | 83        |
| ENSG0000 | 533.02598 | 346.85525 | 449.19009 | 1588.5073 | 799.25572 | 831.23633 | 443.02377 | 1072.9997 |
| 0159388  | 67        | 24        | 92        | 14        | 71        | 59        | 94        | 92        |
| ENSG0000 | 130.25071 | 46.754783 | 59.822045 | 193.10504 | 192.66269 | 187.46593 | 78.942513 | 191.07789 |
| 0179388  | 1         | 24        | 92        | 3         | 63        | 95        | 4         | 29        |
| ENSG0000 | 84.161997 | 60.889950 | 48.277440 | 120.32676 | 187.61476 | 155.53492 | 64.443129 | 154.49215 |
| 0151790  | 91        | 27        | 57        | 05        | 54        | 78        | 58        | 12        |
| ENSG0000 | 144.27771 | 101.12081 | 139.58477 | 270.73521 | 333.16343 | 318.28008 | 128.32776 | 307.39291 |
| 0172331  | 07        | 03        | 38        | 1         | 99        | 4         | 49        | 17        |
| ENSG0000 | 114.21985 | 67.413873 | 44.079402 | 262.00181 | 70.671032 | 203.94646 | 75.237710 | 178.87310 |
| 0205583  | 43        | 51        | 26        | 71        | 71        | 16        | 02        | 38        |
| ENSG0000 | 50.096427 |           | 31.485287 | 128.08977 | 79.084250 | 81.372578 | 40.604191 | 96.182202 |
| 0186280  | 33        | 40.23086  | 33        | 73        | 89        | 11        | 55        | 09        |
| ENSG0000 | 38.073284 | 53.278706 | 46.178421 | 94.126578 | 106.84787 | 112.27355 | 45.843470 | 104.41600 |
| 0101605  | 77        | 48        | 41        | 75        | 09        | 71        | 89        | 23        |
| ENSG0000 | 50.096427 | 36.968898 | 37.782344 | 117.41562 | 94.228043 | 73.132317 | 41.615890 | 94.925329 |
| 0137801  | 33        | 38        | 79        | 92        | 62        | 04        | 16        | 94        |
| ENSG0000 | 41.079070 | 41.318180 | 24.138720 | 97.037710 | 72.353676 | 73.132317 | 35.511990 | 80.841234 |
| 0171246  | 41        | 54        | 28        | 05        | 35        | 04        | 41        | 48        |
| ENSG0000 | 624.20148 | 538.22366 | 421.90285 | 1281.8681 | 1304.0488 | 1017.6722 | 528.10933 | 1201.1964 |
| 0148943  | 45        | 75        | 02        | 5         | 18        | 43        | 41        | 03        |
| ENSG0000 | 382.73670 | 449.06338 | 420.85334 | 879.16165 | 826.17802 | 1115.5253 | 417.55114 | 940.28834 |
| 0169093  | 48        | 32        | 06        | 31        | 53        | 43        | 29        | 05        |

|          |           |           |           |           |           |           |           |           |
|----------|-----------|-----------|-----------|-----------|-----------|-----------|-----------|-----------|
| ENSG0000 | 551.06070 | 578.45452 | 544.69547 | 1324.5647 | 1198.8835 | 1244.2794 | 558.07023 | 1255.9092 |
| 0073969  | 06        | 75        | 08        | 42        | 91        | 22        | 3         | 52        |
| ENSG0000 | 170.32785 | 157.66147 | 118.59458 | 338.66160 | 301.19321 | 365.66158 | 148.86130 | 335.17213 |
| 0147509  | 29        | 84        | 23        | 81        | 09        | 52        | 45        | 47        |
| ENSG0000 | 128.24685 | 148.96291 | 121.74311 | 250.35729 | 292.77999 | 354.33122 | 132.98429 | 299.15617 |
| 0086506  | 4         | 4         | 1         | 19        | 27        | 62        | 3         | 03        |
| ENSG0000 | 180.34713 | 216.37678 | 156.37692 | 412.41026 | 414.77165 | 415.10315 | 184.36695 | 414.09502 |
| 0168917  | 84        | 76        | 71        | 77        | 63        | 16        | 1         | 52        |
| ENSG0000 | 1328.5572 | 1412.4293 | 1397.9467 | 2967.4131 | 3240.7716 | 3089.0678 | 1379.6444 | 3099.0842 |
| 0142871  | 53        | 82        | 57        | 73        | 43        | 7         | 64        | 29        |
| ENSG0000 | 857.65083 | 725.24280 | 665.38907 | 2061.0809 | 1536.2536 | 1454.4060 | 749.42756 | 1683.9135 |
| 0197903  | 58        | 05        | 22        | 61        | 4         | 8         | 95        | 6         |
| ENSG0000 | 851.63926 | 853.54662 | 661.19103 | 1867.0055 | 1645.6254 | 1742.8152 | 788.79230 | 1751.8154 |
| 0006327  | 45        | 43        | 39        | 41        | 76        | 17        | 75        | 12        |
| ENSG0000 | 39.075213 | 56.540668 | 104.95095 | 163.02335 | 132.08752 | 148.32469 | 66.855613 | 147.81185 |
| 0064199  | 31        | 1         | 78        | 29        | 54        | 93        | 06        | 92        |
| ENSG0000 | 193.37220 | 223.98803 | 235.09014 | 491.01081 | 444.21791 | 489.26550 | 217.48346 | 474.83141 |
| 0144455  | 95        | 13        | 54        | 29        | 99        | 13        | 21        | 14        |
| ENSG0000 | 128.24685 | 155.48683 | 99.703409 | 318.28368 | 237.25275 | 281.19890 | 127.81236 | 278.91178 |
| 0177721  | 4         | 73        | 87        | 9         | 27        | 92        | 7         | 36        |
| ENSG0000 | 1068.0558 | 1263.4664 | 1305.5899 | 2724.8188 | 2606.4149 | 2589.5020 | 1212.3707 | 2640.2453 |
| 0059804  | 31        | 68        | 14        | 98        | 92        | 43        | 38        | 11        |
| ENSG0000 | 354.68270 | 353.37917 | 342.14012 | 653.06378 | 748.77641 | 883.76800 | 350.06733 | 761.86940 |
| 0135698  | 55        | 56        | 23        | 86        | 8         | 03        | 45        | 23        |
| ENSG0000 | 32.061713 | 31.532295 | 30.435777 | 63.074511 | 67.305745 | 74.162349 | 31.343262 | 68.180868 |
| 0128045  | 49        | 67        | 75        | 53        | 44        | 67        | 3         | 88        |
| ENSG0000 | 360.69427 | 214.20214 | 221.44652 | 612.30795 | 577.14676 | 542.82719 | 265.44764 | 577.42730 |
| 0124171  | 67        | 65        | 09        | 04        | 72        | 83        | 8         | 53        |
| ENSG0000 | 103.19864 | 164.18540 | 172.11957 | 298.87614 | 300.35188 | 351.24112 | 146.50120 | 316.82305 |
| 0078967  | 03        | 16        | 07        | 7         | 9         | 83        | 42        | 48        |
| ENSG0000 | 4859.3534 | 4741.8048 | 4647.2284 | 10154.996 | 9572.5596 | 10960.577 | 4749.4622 | 10229.377 |
| 0166670  | 51        | 77        | 09        | 36        | 46        | 26        | 46        | 75        |
| ENSG0000 | 1054.0288 | 801.35523 | 797.62727 | 1658.3744 | 2003.1872 | 2007.5336 | 884.33711 | 1889.6984 |
| 0139921  | 31        | 83        | 89        | 65        | 49        | 04        | 61        | 39        |
| ENSG0000 | 633.21884 | 653.47964 | 669.58711 | 1465.2694 | 1224.1232 | 1465.7364 | 652.09519 | 1385.0430 |
| 0143333  | 14        | 48        | 05        | 22        | 45        | 39        | 89        | 35        |
| ENSG0000 | 514.99127 | 379.47486 | 431.34843 | 1231.4085 | 721.01279 | 859.04721 | 441.93819 | 937.15618 |
| 0137331  | 29        | 86        | 64        | 41        | 81        | 71        | 26        | 52        |
| ENSG0000 | 4125.9417 | 3054.2833 | 3295.4600 | 7072.1083 | 7693.0467 | 7259.6700 | 3491.8950 | 7341.6083 |
| 0082153  | 55        | 98        | 74        | 08        | 04        | 07        | 75        | 4         |
| ENSG0000 | 85.163926 | 90.247604 | 101.80242 | 150.40845 | 199.39327 | 229.69727 | 92.404653 | 193.16633 |
| 0275064  | 45        | 86        | 9         | 06        | 09        | 75        | 44        | 3         |
| ENSG0000 | 273.52649 | 257.69496 | 270.77347 | 520.12212 | 577.14676 | 563.42785 | 267.33164 | 553.56558 |
| 0124380  | 32        | 81        | 1         | 59        | 72        | 1         | 41        | 13        |
| ENSG0000 | 73.140783 | 65.239232 | 71.366651 | 137.79354 |           | 157.59499 | 69.915555 | 144.73554 |
| 0087085  | 9         | 43        | 27        | 83        | 138.8181  | 31        | 87        | 71        |

|          |           |           |           |           |           |           |           |           |
|----------|-----------|-----------|-----------|-----------|-----------|-----------|-----------|-----------|
| ENSG0000 | 48.092570 | 54.366027 | 55.624007 | 103.83034 | 115.26108 | 106.09336 | 52.694201 | 108.39493 |
| 0171174  | 23        | 02        | 61        | 98        | 91        | 13        | 62        | 34        |
| ENSG0000 | 45.086784 | 84.811002 | 62.970574 | 157.20109 | 116.10241 | 122.57388 | 64.289453 | 131.95912 |
| 0237036  | 59        | 16        | 65        | 03        | 09        | 35        | 8         | 82        |
| ENSG0000 | 1030.9844 | 1283.0382 | 1360.1644 | 2162.0001 | 2587.9059 | 2717.2260 | 1224.7290 | 2489.0440 |
| 0120885  | 74        | 38        | 13        | 8         | 12        | 89        | 42        | 61        |
| ENSG0000 | 40.077141 | 43.492821 | 54.574498 | 115.47487 | 89.180112 | 75.192382 | 46.048153 | 93.282456 |
| 0116675  | 86        | 62        | 03        | 5         | 71        | 31        | 84        | 66        |
| ENSG0000 | 244.47056 | 213.11482 | 225.64455 | 424.05479 | 414.77165 | 534.58693 | 227.74331 | 457.80446 |
| 0137720  | 53        | 59        | 92        | 29        | 63        | 72        | 68        | 21        |
| ENSG0000 | 102.19671 | 150.05023 | 187.86221 | 196.98655 | 307.92378 | 378.02197 | 146.70305 | 294.31077 |
| 0170345  | 17        | 46        | 44        | 14        | 54        | 68        | 36        | 12        |



| log2Fold change | pvalue    | padj      | gene_name | gene_chr | gene_start | gene_end | gene_strand | gene_lenght |
|-----------------|-----------|-----------|-----------|----------|------------|----------|-------------|-------------|
| -               |           |           |           |          | 10112708   | 10113926 |             |             |
| 3.0687294       | 1.38E-14  | 4.95E-12  | SERPINE1  | 7        | 9          | 6        | +           | 3190        |
| -               |           |           |           |          |            |          |             |             |
| 2.6199490       | 6.39E-16  | 3.06E-13  | FOSB      | 19       | 45467995   | 45475179 | +           | 5553        |
| -               | 0.0005327 | 0.0095138 |           |          |            |          |             |             |
| 2.6091492       | 53        | 64        | H3.Y      | 5        | 17654870   | 17655847 |             | 978         |
| -               |           |           |           |          |            |          |             |             |
| 2.3820226       | 1.53E-12  | 4.31E-10  | ANKRD1    | 10       | -90912096  | 90921276 | -           | 1979        |
| -               |           |           |           |          | 20530205   | 20532179 |             |             |
| 2.3229827       | 1.05E-13  | 3.32E-11  | NUAK2     | 1        | 9          | 1        | -           | 3441        |
| -               |           |           |           |          | 15401050   | 15401998 |             |             |
| 1.8250487       | 6.5E-50   | 4.21E-46  | IRAK1     | X        | 0          | 0        |             | 4001        |
| -               |           |           |           |          |            |          |             |             |
| 1.8103241       | 5.74E-26  | 8.26E-23  | TIMM17B   | X        | -48893447  | 48898143 | -           | 2562        |
| -               |           |           |           |          | 18667179   | 18668042 |             |             |
| 1.7644604       | 5.38E-23  | 5.8E-20   | PTGS2     | 1        | 1          | 7        | -           | 5269        |
| -               |           |           |           |          | 15448730   | 15449069 |             |             |
| 1.6811286       | 3.08E-29  | 6.65E-26  | SLC10A3   | X        | 6          | 0        | -           | 2247        |
| -               |           |           |           |          | 10116250   | 10116559 |             |             |
| 1.6645273       | 1.09E-38  | 4.7E-35   | VGF       | 7        | 9          | 3        | -           | 2704        |
| -               | 0.0023782 | 0.0287495 |           |          | 10053714   | 10058741 |             |             |
| 1.6182851       | 16        | 41        | BEGAIN    | 14       | 7          | 3        |             | 7878        |
| -               | 0.0022038 | 0.0272781 |           |          |            |          |             |             |
| 1.5756383       | 26        | 38        | APOLD1    | 12       | -12725917  | 12829975 | +           | 7243        |
| -               | 0.0014743 | 0.0200299 |           |          |            |          |             |             |
| 1.5705228       | 58        | 14        | GPR84     | 12       | 54362445   | 54364487 | -           | 2043        |
| -               | 0.0013162 | 0.0185641 |           |          | 16122966   | 16123830 |             |             |
| 1.5026547       | 83        | 75        | NR1I3     | 1        | 6          | 2        |             | 3305        |
| -               | 0.0001031 | 0.0027304 |           |          |            |          |             |             |
| 1.4442954       | 15        | 55        | SRRM3     | 7        | -76201900  | 76287288 | +           | 6873        |
| -               | 0.0031980 | 0.0356021 |           |          |            |          |             |             |
| 1.4410503       | 62        | 56        | HIST1H2AI | 6        | 27808199   | 27808701 | +           | 503         |
| -               |           |           |           |          | 14567085   | 14570814 |             |             |
| 1.4402894       | 1.1E-10   | 2.13E-08  | PDZK1     | 1        | 2          | 8        |             | 2480        |
| -               | 0.0027035 | 0.0317339 |           |          |            |          |             |             |
| 1.4046128       | 22        | 1         | TGM2      | 20       | -38127387  | 38166578 | -           | 8036        |
| -               | 0.0025094 | 0.0300549 |           |          | 12034133   | 12036918 |             |             |
| 1.3940773       | 12        | 09        | MSI1      | 12       | 0          | 0        |             | 3090        |
| -               | 0.0000008 |           |           |          |            |          |             |             |
| 1.3754498       | 79        | 0.0000552 | CARD10    | 22       | -37490362  | 37519542 |             | 5652        |
| -               | 0.0000001 |           |           |          |            |          |             |             |
| 1.3661769       | 39        | 0.0000109 | GSG1      | 12       | -13083560  | 13103683 | -           | 3005        |
| -               |           |           |           |          | 13378403   | 13382577 |             |             |
| 1.3632873       | 4.66E-24  | 6.03E-21  | SRPRB     | 3        | 3          | 2        | +           | 4180        |

|           |           |           |           |    |           |          |   |      |
|-----------|-----------|-----------|-----------|----|-----------|----------|---|------|
| -         |           |           |           |    |           |          |   |      |
| 1.3620884 | 1.05E- 22 | 1.04E-19  | FRMD8     | 11 | 65386599  | 65413525 | + | 4091 |
| -         | 0.0003867 | 0.0075409 |           |    | 22992230  | 23001310 |   |      |
| 1.3415552 | 45        | 49        | FBXO36    | 2  | 2         | 9        | + | 3945 |
| -         | 0.0026006 | 0.0307780 |           |    | 19629121  | 19631829 |   |      |
| 1.3298308 | 94        | 54        | TCTEX1D2  | 3  | 9         | 9        | - | 1246 |
| -         | 0.0016635 | 0.0219553 | AL365181. |    | 15664166  | 15664488 |   |      |
| 1.3297772 | 81        | 42        | 3         | 1  | 6         | 7        | - | 3222 |
| -         | 0.0000038 | 0.0001931 |           |    |           |          |   |      |
| 1.3288589 | 9         | 57        | MT-TT     | MT | 15888     | 15953    | + | 66   |
| -         |           | 0.0018096 |           |    |           |          |   |      |
| 1.3137714 | 0.0000607 | 91        | LIF       | 22 | 30240447  | 30246851 |   | 3969 |
| -         | 0.0011745 | 0.0171049 |           |    |           |          |   |      |
| 1.2976076 | - 06      | 82        | SLC16A6   | 17 | -68267026 | 68291267 |   | 4061 |
| 1.2923317 | 7.19E- 29 | 1.33E-25  | NEMP1     | 12 | -57055643 | 57088063 |   | 5708 |
| -         |           |           |           |    |           |          |   |      |
| 1.2907173 | 1.4E- 15  | 6.46E-13  | MED20     | 6  | -41905354 | 41921139 |   | 3278 |
| -         | 0.0000001 | 0.0000091 |           |    |           |          |   |      |
| 1.2818565 | 14        | 8         | DUS2      | 16 | -67987746 | 68079320 | + | 4472 |
| -         |           | 0.0000003 |           |    |           |          |   |      |
| 1.2783763 | 2.5E-09   | 56        | CR IPT    | 2  | 46616416  | 46625742 | + | 2561 |
| -         | 0.0006202 | 0.0106505 |           |    | 20330549  | 20330960 |   |      |
| 1.2759139 | 61        | 53        | BTG2      | 1  | 1         | 2        | + | 2757 |
| -         | 0.0001322 | 0.0033058 |           |    |           |          |   |      |
| 1.2720023 | 65        | 53        | EGR3      | 8  | 22687659  | 22693302 | - | 4855 |
| -         |           | 0.0017046 |           |    | 15585473  | 15592040 |   |      |
| 1.2610894 | 0.0000546 | 37        | TDO2      | 4  | 8         | 6        | + | 5264 |
| 1.2593021 | 1.44E-08  | 0.0000016 |           |    | 13464680  | 13467981 |   |      |
| -         |           | 8         | BPGM      | 7  |           | 3        | + | 2539 |
| -         |           |           |           |    |           |          |   |      |
| 1.2460385 | 0.0026910 | 0.0316167 |           |    |           |          |   |      |
| 84        | 97        | 27        | STAG3L1   | 7  | 75359194  | 75395383 | + | 2094 |
| -         | 0.0008770 | 0.0139846 |           |    |           |          |   |      |
| 1.2421171 | 8         | 67        | KDM4D     | 11 | 94973681  | 94999518 | + | 2978 |
| -         | 0.0003303 | 0.0067564 |           |    |           |          |   |      |
| 1.1892037 | 34        | 54        | MYOM1     | 18 | 3066807   | 3220108  | - | 6574 |
| -         | 0.0009941 | 0.0152142 |           |    |           |          |   |      |
| 1.1888078 | 52        | 9         | THBS1     | 15 | 39581079  | 39599466 | + | 9158 |
| -         | 0.0023372 | 0.0285051 |           |    |           |          |   |      |
| 1.1861457 | 16        | 08        | NPTX1     | 17 | 80467148  | 80477843 |   | 6703 |
| -         |           |           |           |    |           |          |   |      |
| 1.1856302 | 4.4E- 13  | 1.3E-10   | LIN7C     | 11 | -27494576 | 27506773 | - | 4688 |
| -         |           |           |           |    |           |          |   |      |
| 1.1707717 | 1.03E- 13 | 3.32E-11  | ASMTL     | X  | 1403139   | 1453762  | - | 3506 |

|           |           |           |          |         |           |           |          |   |      |
|-----------|-----------|-----------|----------|---------|-----------|-----------|----------|---|------|
| -         |           |           |          |         |           |           |          |   |      |
| 1.1701657 | 6.07E- 21 | 5.24E-18  | NSF      | 17      | 46590669  | 46757464  | +        |   | 5005 |
| -         | 0.0000000 | 0.0000037 |          |         |           |           |          |   |      |
| 1.1696220 | 38        | 3         | RGS20    | 8       | 53851808  | 53959303  | +        |   | 3192 |
| -         | 0.0000001 |           |          |         |           |           |          |   |      |
| 1.1695742 | 38        | 0.0000109 | HBQ1     | 16      | 180453    | 181181    | +        |   | 536  |
| -         |           | 0.0000001 |          |         | 13681864  | 13685589  |          |   |      |
| 1.1681012 | 6.87E-10  | -         | 11       | SLC35G2 | 3         | 7         | 2        | + | 4287 |
| 1.1677902 | 1.1E- 29  | 2.86E-26  | CYR61    | 1       | 85580761  | 85583962  | +        |   | 2455 |
| -         |           |           | HIST1H2B |         |           |           |          |   |      |
| 1.1676100 | 5.43E- 14 | 1.85E-11  | K        | 6       | 27146418  | 27146798  | -        |   | 381  |
| -         |           |           | TNFRSF12 |         |           |           |          |   |      |
| 1.1509348 | 7.67E- 18 | 4.97E-15  | A        | 16      | 3018445   | 3022383   | +        |   | 1848 |
| -         | 0.0009198 | 0.0144530 |          |         | 12467379  | 12469751  |          |   |      |
| 1.1452016 | 51        | 51        | SPA17    | 11      | 8         | 8         | +        |   | 5205 |
| -         |           |           |          |         |           |           |          |   |      |
| 1.1266174 | 9.78E- 11 | 1.95E-08  | SUMF1    | 3       | 3700814   | 4467281   | -        |   | 6952 |
| -         | 0.0000019 | 0.0001070 |          |         |           |           |          |   |      |
| 1.1255765 | 2         | 88        | ANXA2R   | 5       | 43039081  | 43043170  | -        |   | 2386 |
| -         |           |           |          |         |           |           |          |   |      |
| 1.1231241 | 2.09E- 22 | 1.94E-19  | SLC2A3   | 12      | 7919230   | 7936275   | -        |   | 6159 |
| -         |           |           | MPHOSPH  |         |           |           |          |   |      |
| 1.1214660 | 1.8E- 12  | 4.95E-10  | 6        | 16      | 82147798  | 82170226  |          |   | 2190 |
| -         | 0.0041496 | 0.0427722 |          |         |           |           |          |   |      |
| 1.1206196 | 71        | 86        | RASL11B  | 4       | -52862290 | 52866835  | +        |   | 2472 |
| -         |           | 0.0000036 |          |         |           |           |          |   |      |
| 1.1198856 | 3.62E-08  | 3         | PARD6B   | 20      | 50731544  | 50756795  | +        |   | 4726 |
| -         | 0.0000014 |           |          |         |           |           |          |   |      |
| 1.1137317 | - 1       | 0.000082  | UBE2D4   | 7       | 43926438  | 43956136  | +        |   | 4713 |
|           |           |           |          |         | 10277050  | 10278062  |          |   |      |
| 1.1067726 | 2.13E- 31 | 6.88E-28  | MMP10    | 11      | 3         | 8         |          |   | 1758 |
| -         |           |           |          |         |           |           |          |   |      |
| 1.0950977 | 1.34E- 14 | 4.95E-12  | TMX1     | 14      | -51240162 | 51257546  | +        |   | 4499 |
| -         |           |           |          |         | 18259862  | 18260440  |          |   |      |
| 1.0863051 | 3.76E- 17 | 2.12E-14  | RGS16    | 1       | 3         | 8         |          |   | 2427 |
| -         |           | 0.0000021 |          |         |           |           |          |   |      |
| 1.0834327 | 1.94E-08  | -         | 3        | IER3    | 6         | -30743199 | 30744554 | - | 1356 |
|           |           |           |          |         | 20081059  | 20082733  |          |   |      |
| 1.0719527 | 3.29E- 19 | 2.37E-16  | BZW1     | 2       | 4         | 8         | +        |   | 8085 |
| -         |           |           |          |         |           |           |          |   |      |
| 1.0637177 |           | 0.0016110 | AC239860 |         | 14550904  | 14552059  |          |   |      |
| 42        | 0.0000503 | 34        | .1       | 1       | 7         | 4         | +        |   | 1270 |
| -         |           |           |          |         |           |           |          |   |      |
| 1.0501227 | 3.44E- 11 | 7.19E-09  | SNRNP27  | 2       | 69893560  | 69905575  | +        |   | 2275 |
| -         | 0.0001363 | 0.0033744 |          |         | 10088999  | 10089697  |          |   |      |
| 1.0484821 | 12        | 35        | ACHE     | 7       | 4         | 4         | -        |   | 3783 |

|           |           |           |          |    |           |          |   |      |
|-----------|-----------|-----------|----------|----|-----------|----------|---|------|
| -         | 0.0008451 | 0.0136600 |          |    |           |          |   |      |
| 1.0418827 | 13        | 29        | RBKS     | 2  | 27781364  | 27891098 |   | 3585 |
| -         | 0.0011991 | 0.0173759 |          |    |           |          |   |      |
| 1.0393409 | 87        | 28        | ZEB1-AS1 | 10 | -31206278 | 31320447 |   | 3831 |
| -         |           |           |          |    |           |          |   |      |
| 1.0233963 | 4.56E-14  | 1.59E-11  | CLU      | 8  | -27596917 | 27615031 |   | 6616 |
| -         | 0.0038893 | 0.0408732 |          |    |           |          |   |      |
| 1.0192638 | 84        | 62        | DNAJC6   | 1  | -65248219 | 65415869 | + | 6954 |
| -         |           | 0.0000036 |          |    | 11187893  | 11188597 |   |      |
| 1.0058072 | 3.67E-08  | 6         | C11orf1  | 11 | 5         | 5        | + | 3831 |
| -         | 0.0002726 | 0.0058730 |          |    |           |          |   |      |
| 1.0049928 | 26        | 25        | FOS      | 14 | 75278774  | 75282230 | + | 3238 |

| gene_biot<br>type | tf_family | A2780M1<br>_count | A2780M2<br>_count | A2780M3<br>_count | A2780C1_<br>count | A2780C2_<br>count | A2780C3_<br>count | A2780M1<br>_fpkm |
|-------------------|-----------|-------------------|-------------------|-------------------|-------------------|-------------------|-------------------|------------------|
| protein_coding    | -         | 20                | 9                 | 20                | 194               | 132               | 125               | 0.308173016      |
| protein_coding    | TF_bZIP   | 52                | 17                | 33                | 224               | 270               | 199               | 0.460289393      |
| protein_coding    | -         | 19                | 3                 | 3                 | 98                | 18                | 45                | 0.954926714      |
| protein_coding    | -         | 38                | 29                | 39                | 120               | 264               | 231               | 0.943828526      |
| protein_coding    | -         | 25                | 39                | 42                | 160               | 236               | 197               | 0.357117089      |
| protein_coding    | -         | 1347              | 1466              | 1128              | 5394              | 5609              | 4533              | 16.54833641      |
| protein_coding    | -         | 349               | 312               | 481               | 1242              | 1615              | 1576              | 6.695786511      |
| protein_coding    | -         | 186               | 206               | 269               | 853               | 986               | 674               | 1.735162057      |
| protein_coding    | -         | 348               | 354               | 345               | 1070              | 1313              | 1331              | 7.612572962      |
| protein_coding    | -         | 1370              | 1541              | 1201              | 5038              | 4805              | 4589              | 24.90400395      |
| protein_coding    | -         | 13                | 20                | 14                | 78                | 51                | 32                | 0.081111545      |
| protein_coding    | -         | 11                | 24                | 13                | 54                | 51                | 54                | 0.074649946      |
| protein_coding    | -         | 35                | 25                | 14                | 131               | 61                | 49                | 0.842083144      |
| protein_coding    | THR-like  | 14                | 24                | 18                | 60                | 63                | 54                | 0.208214931      |
| protein_coding    | -         | 44                | 37                | 29                | 135               | 84                | 108               | 0.314674557      |
| protein_coding    | -         | 16                | 28                | 26                | 101               | 42                | 65                | 1.563533872      |
| protein_coding    | -         | 133               | 94                | 112               | 382               | 319               | 311               | 2.636059791      |
| protein_coding    | -         | 36                | 17                | 20                | 96                | 52                | 62                | 0.220200281      |
| protein_coding    | -         | 17                | 31                | 18                | 71                | 57                | 64                | 0.270424315      |
| protein_coding    | -         | 87                | 53                | 87                | 165               | 251               | 235               | 0.756610556      |
| protein_coding    | -         | 76                | 101               | 71                | 265               | 230               | 214               | 1.243152514      |
| protein_coding    | -         | 546               | 644               | 676               | 1639              | 1983              | 1722              | 6.420541501      |

|                                    |         |      |     |     |      |      |      |             |
|------------------------------------|---------|------|-----|-----|------|------|------|-------------|
| protein_coding                     | -       | 516  | 530 | 481 | 1612 | 1551 | 1202 | 6.19976915  |
| protein_coding                     | -       | 79   | 38  | 26  | 119  | 134  | 143  | 0.984317894 |
| protein_coding                     | -       | 23   | 29  | 17  | 62   | 64   | 66   | 0.907329623 |
| antisense                          | -       | 29   | 36  | 24  | 115  | 80   | 54   | 0.442412876 |
| Mt_tRNA                            | -       | 57   | 110 | 111 | 233  | 251  | 290  | 42.450833   |
| protein_coding                     | -       | 160  | 93  | 53  | 363  | 227  | 239  | 1.981500473 |
| protein_coding                     | -       | 54   | 22  | 28  | 106  | 97   | 78   | 0.653606055 |
| protein_coding                     | -       | 1027 | 861 | 971 | 2692 | 2953 | 2148 | 8.843858305 |
| protein_coding                     | -       | 244  | 250 | 243 | 710  | 675  | 612  | 3.658778966 |
| protein_coding                     | -       | 126  | 266 | 198 | 484  | 557  | 559  | 1.384917958 |
| protein_coding                     | -       | 116  | 124 | 111 | 267  | 380  | 303  | 2.226402635 |
| protein_coding                     | -       | 532  | 319 | 428 | 1637 | 950  | 807  | 9.484843355 |
| protein_coding                     | zf-C2H2 | 130  | 43  | 57  | 199  | 229  | 182  | 1.316162203 |
| protein_coding                     | -       | 84   | 56  | 46  | 124  | 223  | 151  | 0.784365895 |
| protein_coding                     | -       | 144  | 93  | 133 | 279  | 396  | 309  | 2.787758109 |
| transcribed_unprocessed_pseudogene | -       | 114  | 62  | 42  | 270  | 84   | 198  | 2.675983742 |
| protein_coding                     | -       | 50   | 37  | 30  | 132  | 94   | 79   | 0.825278645 |
| protein_coding                     | -       | 38   | 49  | 44  | 97   | 127  | 109  | 0.284124833 |
| protein_coding                     | -       | 50   | 34  | 36  | 121  | 112  | 71   | 0.26836425  |
| protein_coding                     | -       | 41   | 38  | 23  | 100  | 86   | 71   | 0.300656041 |
| protein_coding                     | -       | 623  | 495 | 402 | 1321 | 1550 | 988  | 6.532143852 |
| protein_coding                     | -       | 382  | 413 | 401 | 906  | 982  | 1083 | 5.355582919 |

|                        |   |      |      |      |       |       |       |             |
|------------------------|---|------|------|------|-------|-------|-------|-------------|
| protein_coding         | - | 550  | 532  | 519  | 1365  | 1425  | 1208  | 5.401494078 |
| protein_coding         | - | 170  | 145  | 113  | 349   | 358   | 355   | 2.617829367 |
| protein_coding         | - | 128  | 137  | 116  | 258   | 348   | 344   | 11.73817221 |
| protein_coding         | - | 180  | 199  | 149  | 425   | 493   | 403   | 2.063831887 |
| protein_coding         | - | 1326 | 1299 | 1332 | 3058  | 3852  | 2999  | 26.54894845 |
| protein_coding         | - | 856  | 667  | 634  | 2124  | 1826  | 1412  | 110.4343262 |
| protein_coding         | - | 850  | 785  | 630  | 1924  | 1956  | 1692  | 22.60852635 |
| protein_coding         | - | 39   | 52   | 100  | 168   | 157   | 144   | 0.368297838 |
| protein_coding         | - | 193  | 206  | 224  | 506   | 528   | 475   | 1.364592067 |
| protein_coding         | - | 128  | 143  | 95   | 328   | 282   | 273   | 2.636907084 |
| protein_coding         | - | 1066 | 1162 | 1244 | 2808  | 3098  | 2514  | 8.507506649 |
| protein_coding         | - | 354  | 325  | 326  | 673   | 890   | 858   | 7.945375809 |
| protein_coding         | - | 32   | 29   | 29   | 65    | 80    | 72    | 0.636292506 |
| protein_coding         | - | 360  | 197  | 211  | 631   | 686   | 527   | 3.744243462 |
| protein_coding         | - | 103  | 151  | 164  | 308   | 357   | 341   | 1.07422457  |
| protein_coding         | - | 4850 | 4361 | 4428 | 10465 | 11378 | 10641 | 135.6057686 |
| protein_coding         | - | 1052 | 737  | 760  | 1709  | 2381  | 1949  | 11.4935726  |
| protein_coding         | - | 632  | 601  | 638  | 1510  | 1455  | 1423  | 12.79978275 |
| protein_coding         | - | 514  | 349  | 411  | 1269  | 857   | 834   | 18.63196785 |
| protein_coding         | - | 4118 | 2809 | 3140 | 7288  | 9144  | 7048  | 25.03580814 |
| unprocessed_pseudogene | - | 85   | 83   | 97   | 155   | 237   | 223   | 3.289807614 |
| protein_coding         | - | 273  | 237  | 258  | 536   | 686   | 547   | 5.898431533 |
| protein_coding         | - | 73   | 60   | 68   | 142   | 165   | 153   | 0.948509785 |

|                |         |      |      |      |      |      |      |             |
|----------------|---------|------|------|------|------|------|------|-------------|
| protein_coding | -       | 48   | 50   | 53   | 107  | 137  | 103  | 0.658123463 |
| antisense      | -       | 45   | 78   | 60   | 162  | 138  | 119  | 0.57737192  |
| protein_coding | -       | 1029 | 1180 | 1296 | 2228 | 3076 | 2638 | 7.64495925  |
| protein_coding | -       | 40   | 40   | 52   | 119  | 106  | 73   | 0.282735669 |
| protein_coding | -       | 244  | 196  | 215  | 437  | 493  | 519  | 3.130638854 |
| protein_coding | TF_bZIP | 102  | 138  | 179  | 203  | 366  | 367  | 1.548383818 |



| A2780M2_fpkm    | A2780M3_fpkm    | A2780C1_fpkm    | A2780C2_fpkm           | A2780C3_fpkm    |
|-----------------|-----------------|-----------------|------------------------|-----------------|
| 0.1491576<br>58 | 0.3206659<br>63 | 2.8945080<br>81 | 1.6870231<br>93        | 1.9621680<br>56 |
| 0.1618508<br>47 | 0.3039483<br>7  | 1.9199241<br>18 | 1.9823206<br>07        | 1.7944950<br>89 |
| 0.1621720<br>96 | 0.1568902<br>49 | 4.7692593<br>56 | 0.7503630<br>76        | 2.3040427<br>36 |
| 0.7747220<br>78 | 1.0079346<br>26 | 2.8860189<br>03 | 5.4387104<br>44        | 5.8449803<br>69 |
| 0.5992025<br>64 | 0.6242782<br>01 | 2.2130897<br>64 | 2.7961800<br>66        | 2.8668067<br>92 |
| 19.371316<br>98 | 14.419629<br>46 | 64.166168<br>91 | 57.155061<br>14        | 56.732776<br>56 |
| 6.4382701<br>74 | 9.6023935<br>92 | 23.073112<br>83 | 25.699886<br>56        | 30.803066<br>89 |
| 2.0669632<br>29 | 2.6111849<br>49 | 7.7052112<br>86 | 7.6293321<br>27        | 6.4054341<br>25 |
| 8.3290202<br>58 | 7.8528911<br>01 | 22.664410<br>35 | 23.823165<br>23.823165 | 29.661414<br>25 |
| 30.129344<br>29 | 22.716942<br>17 | 88.677858<br>23 | 72.447684<br>54        | 84.982253<br>19 |
| 0.1342170<br>68 | 0.0908919<br>9  | 0.4712402<br>15 | 0.2639319<br>73        | 0.2033999<br>65 |
| 0.1751807<br>92 | 0.0917990<br>99 | 0.3548452<br>48 | 0.2870711<br>15        | 0.3733293<br>6  |
| 0.6469420<br>36 | 0.3504880<br>55 | 3.0518743<br>46 | 1.2173046<br>29        | 1.2010043<br>62 |
| 0.3839136<br>08 | 0.2785573<br>32 | 0.8640592<br>15 | 0.7771536<br>49        | 0.8181617<br>41 |
| 0.2846093<br>14 | 0.2158068<br>4  | 0.9348698<br>29 | 0.4982768<br>92        | 0.7868542<br>28 |
| 2.9429560<br>41 | 2.6437410<br>55 | 9.5569014<br>63 | 3.4042316<br>91        | 6.4708635<br>62 |
| 2.0038716<br>52 | 2.3098293<br>43 | 7.3312056<br>39 | 5.2441705<br>49        | 6.2795074<br>41 |
| 0.1118414<br>33 | 0.1272927<br>36 | 0.5685845<br>11 | 0.2638160<br>54        | 0.3863390<br>72 |
| 0.5303919<br>73 | 0.2979391<br>52 | 1.0936128<br>1  | 0.7520629<br>28        | 1.0371423<br>44 |
| 0.4957553<br>91 | 0.7872825<br>98 | 1.3894582<br>78 | 1.8105452<br>08        | 2.0820088<br>93 |
| 1.7769312<br>54 | 1.2084464<br>9  | 4.1972526<br>99 | 3.1204782<br>85        | 3.5660396<br>54 |
| 8.1452292<br>91 | 8.2714941<br>42 | 18.662352<br>63 | 19.341236<br>59        | 20.628789<br>13 |

|           |           |           |           |           |
|-----------|-----------|-----------|-----------|-----------|
| 6.8492042 | 6.0135253 | 18.754231 | 15.456819 | 14.712682 |
| 72        | 93        | 71        | 07        | 38        |
| 0.5092491 | 0.3370853 | 1.4356999 | 1.3848272 | 1.8151223 |
| 56        | 61        | 11        | 34        | 36        |
| 1.2304775 | 0.6978216 | 2.3683035 | 2.0941111 | 2.6524228 |
| 21        | 37        | 54        | 86        | 73        |
| 0.5907050 | 0.3809774 | 1.6987756 | 1.0122837 | 0.8392379 |
| 63        | 39        | 36        | 28        | 13        |
| 88.113505 | 86.018644 | 168.02569 | 155.04850 | 220.02444 |
| 27        | 7         | 67        | 78        | 47        |
| 1.2387839 | 0.6829805 | 4.3530057 | 2.3317531 | 3.0153218 |
| 74        | 3         | 98        | 03        | 4         |
| 0.2864068 | 0.3526457 | 1.2423289 | 0.9738152 | 0.9617860 |
| 63        | 01        | 2         | 02        | 74        |
| 7.9746735 | 8.7005922 | 22.446819 | 21.091976 | 18.843743 |
| 85        | 84        | 31        | 93        | 49        |
| 4.0320395 | 3.7914983 | 10.308918 | 8.3952305 | 9.3488748 |
| 94        | 97        | 8         | 77        | 08        |
| 3.1446590 | 2.2645241 | 5.1511866 | 5.0779825 | 6.2593160 |
| 88        | 04        | 46        | 64        | 99        |
| 2.5597988 | 2.2168022 | 4.9620987 | 6.0493933 | 5.9244756 |
| 25        | 45        | 44        | 3         | 83        |
| 6.1171290 | 7.9400009 | 28.260226 | 14.048328 | 14.657288 |
| 93        | 65        | 14        | 18        | 62        |
| 0.4682447 | 0.6004808 | 1.9508665 | 1.9230211 | 1.8771502 |
| 86        | 66        | 47        | 16        | 04        |
| 0.5624266 | 0.4469464 | 1.1211649 | 1.7271369 | 1.4364084 |
| 29        | 62        | 8         | 98        | 06        |
| 1.9364842 | 2.6791837 | 5.2300425 | 6.3587286 | 6.0941431 |
| 83        | 01        | 46        | 15        | 26        |

|           |           |           |           |           |
|-----------|-----------|-----------|-----------|-----------|
| 1.5653402 | 1.0258554 | 6.1369248 | 1.6354618 | 4.7348408 |
| 08        | 39        | 66        | 34        | 31        |
| 0.6568568 | 0.5152406 | 2.1096623 | 1.2868886 | 1.3283706 |
| 9         | 43        | 74        | 34        | 43        |
| 0.3940579 | 0.3423233 | 0.7022726 | 0.7876110 | 0.8302591 |
| 64        | 54        | 48        | 97        | 48        |
| 0.1962781 | 0.2010552 | 0.6288520 | 0.4986033 | 0.3882170 |
| 73        | 48        | 06        | 46        | 28        |
| 0.2997147 | 0.1754979 | 0.7100591 | 0.5230787 | 0.5304030 |
| 43        | 99        | 04        | 01        | 35        |
| 5.5822762 | 4.3858321 | 13.411548 | 13.479751 | 10.553249 |
| 51        | 06        | 8         | 94        | 67        |
| 6.2277600 | 5.8498672 | 12.299288 | 11.419244 | 15.467973 |
| 13        | 82        | 97        | 74        | 38        |

|           |           |           |           |           |
|-----------|-----------|-----------|-----------|-----------|
| 5.6195466 | 5.3036740 | 12.980525 | 11.607764 | 12.085920 |
| 3         | 84        | 93        | 47        | 24        |
| 2.4015898 | 1.8106275 | 5.2038679 | 4.5725445 | 5.5690657 |
| 99        | 04        | 03        | 87        | 02        |
| 13.512929 | 11.068958 | 22.909659 | 26.469897 | 32.137384 |
| 35        | 31        | 57        | 48        | 15        |
| 2.4541060 | 1.7776503 | 4.7184479 | 4.6884710 | 4.7072626 |
| 25        | 28        | 21        | 72        | 79        |
| 27.973794 | 27.750210 | 59.285666 | 63.969445 | 61.170473 |
| 71        | 43        | 15        | 62        | 26        |
| 92.553870 | 85.109459 | 265.33421 | 195.39507 | 185.57804 |
| 89        | 9         | 51        | 03        | 37        |
| 22.457500 | 17.436211 | 49.552642 | 43.152373 | 45.847458 |
| 53        | 76        | 63        | 55        | 18        |
| 0.5281731 | 0.9826363 | 1.5362159 | 1.2297496 | 1.3853471 |
| 73        | 34        | 41        | 95        | 94        |
| 1.5665749 | 1.6479795 | 3.4642120 | 3.0964349 | 3.4213753 |
| 79        | 08        | 89        | 74        | 13        |
| 3.1685409 | 2.0364170 | 6.5428524 | 4.8185511 | 5.7293991 |
| 69        | 21        | 1         | 56        | 45        |
| 9.9744659 | 10.330556 | 21.699544 | 20.507325 | 20.439578 |
| 64        | 77        | 56        | 01        | 73        |
| 7.8457230 | 7.6135470 | 14.626306 | 16.568519 | 19.618240 |
| 72        | 79        | 46        | 26        | 05        |
| 0.6202164 | 0.6000163 | 1.2514935 | 1.3194086 | 1.4584814 |
| 21        | 49        | 33        | 46        | 21        |
| 2.2037698 | 2.2835067 | 6.3547630 | 5.9179079 | 5.5838503 |
| 52        | 01        | 47        | 2         | 33        |
| 1.6938433 | 1.7797539 | 3.1104053 | 3.0882224 | 3.6230456 |
| 22        | 3         | 93        | 9         | 86        |
| 131.14778 | 128.82563 | 283.32446 | 263.86686 | 303.09616 |
| 04        | 56        | 76        | 89        | 66        |
| 8.6605450 | 8.6399484 | 18.079640 | 21.576510 | 21.692655 |
| 17        | 53        | 43        | 42        | 39        |
| 13.091771 | 13.445112 | 29.612214 | 24.441678 | 29.359725 |
| 73        | 94        | 76        | 21        | 78        |
| 13.606908 | 15.502283 | 44.541583 | 25.766708 | 30.798050 |
| 56        | 85        | 44        | 09        | 89        |
| 18.368151 | 19.863838 | 42.903434 | 46.109880 | 43.651858 |
| 12        | 53        | 45        | 66        | 86        |
| 3.4551594 | 3.9064436 | 5.8088705 | 7.6082089 | 8.7926141 |
| 98        | 64        | 27        | 26        | 11        |
| 5.5075782 | 5.8003187 | 11.213652 | 12.293640 | 12.039897 |
| 19        | 09        | 88        | 8         | 69        |
| 0.8385107 |           | 1.7865522 | 1.7782196 | 2.0252188 |
| 56        | 0.9193611 | 51        | 62        | 49        |

|           |           |           |           |           |
|-----------|-----------|-----------|-----------|-----------|
| 0.7373515 | 0.7561366 | 1.4205559 | 1.5580063 | 1.4386824 |
| 09        | 03        | 29        | 1         | 17        |
| 1.0764061 | 0.8010371 | 2.0126422 | 1.4686041 | 1.5554343 |
| 72        | 37        | 35        | 11        | 32        |
| 9.4293170 | 10.018969 | 16.028150 | 18.955211 | 19.966234 |
| 69        | 56        | 42        | 72        | 42        |
| 0.3041018 | 0.3824566 | 0.8144716 | 0.6214539 | 0.5256601 |
| 3         | 44        | 92        | 95        | 38        |
| 2.7048155 | 2.8703830 | 5.4291645 | 5.2465349 | 6.7837850 |
| 1         | 73        | 47        | 75        | 28        |
| 2.2531804 | 2.8274161 | 2.9838907 | 4.6083138 | 5.6755256 |
| 31        | 8         | 14        | 17        | 54        |

**Supplementary Table 2:** Decreased differential expression of genes in A2780 cells transfected with mir146 (A2780M) and A2780 cells transfected with miRctrl (A2780C).

| Transcript Id   | Gene Id(name)                 | Mirna Name          | miTG score  |
|-----------------|-------------------------------|---------------------|-------------|
| ENST00000223095 | ENSG00000106366<br>(SERPINE1) | hsa-miR-1825        | 0.997635826 |
| UTR3            | 7:100780748-100780761         | 0.007831621         |             |
| UTR3            | 7:100781232-100781251         | 0.006438778         |             |
| UTR3            | 7:100782381-100782388         | 0.0986726           |             |
| UTR3            | 7:100777125-100777131         | 0.013094968         |             |
| ENST00000223095 | ENSG00000106366<br>(SERPINE1) | hsa-miR-5011-<br>5p | 0.994960038 |
| UTR3            | 7:100782182-100782188         | 0.010920577         |             |
| UTR3            | 7:100782183-100782190         | 0.019426852         |             |
| UTR3            | 7:100782207-100782213         | 0.010762316         |             |
| UTR3            | 7:100782208-100782214         | 0.008821141         |             |
| UTR3            | 7:100782230-100782236         | 0.009068804         |             |

|                 |                               |                      |             |
|-----------------|-------------------------------|----------------------|-------------|
| UTR3            | 7:100782231-100782238         | 0.01855238           |             |
| UTR3            | 7:100782235-100782242         | 0.019536452          |             |
| ENST00000223095 | ENSG00000106366<br>(SERPINE1) | hsa-miR-2110         | 0.988454941 |
| UTR3            | 7:100781238-100781265         | 0.001791457          |             |
| UTR3            | 7:100781319-100781346         | 0.003564891          |             |
| UTR3            | 7:100781453-100781477         | 0.001918674          |             |
| UTR3            | 7:100781888-100781905         | 0.076159462          |             |
| ENST00000223095 | ENSG00000106366<br>(SERPINE1) | hsa-miR-548az-<br>5p | 0.96870096  |
| UTR3            | 7:100780824-100780847         | 0.007260622          |             |
| UTR3            | 7:100781092-100781112         | 0.004870355          |             |
| UTR3            | 7:100782458-100782474         | 0.054673259          |             |

|                 |                               |                 |             |
|-----------------|-------------------------------|-----------------|-------------|
| ENST00000223095 | ENSG00000106366<br>(SERPINE1) | hsa-miR-548t-5p | 0.968445299 |
|-----------------|-------------------------------|-----------------|-------------|

|      |                       |            |
|------|-----------------------|------------|
| UTR3 | 7:100780830-100780847 | 0.00727993 |
|------|-----------------------|------------|

|      |                       |             |
|------|-----------------------|-------------|
| UTR3 | 7:100781085-100781112 | 0.004713773 |
|------|-----------------------|-------------|

|      |                       |             |
|------|-----------------------|-------------|
| UTR3 | 7:100782458-100782474 | 0.054673259 |
|------|-----------------------|-------------|

|                 |                               |                 |             |
|-----------------|-------------------------------|-----------------|-------------|
| ENST00000223095 | ENSG00000106366<br>(SERPINE1) | hsa-miR-6875-3p | 0.966975366 |
|-----------------|-------------------------------|-----------------|-------------|

|      |                       |            |
|------|-----------------------|------------|
| UTR3 | 7:100780768-100780792 | 0.01135348 |
|------|-----------------------|------------|

|      |                       |             |
|------|-----------------------|-------------|
| UTR3 | 7:100780785-100780798 | 0.009062388 |
|------|-----------------------|-------------|

|      |                       |            |
|------|-----------------------|------------|
| UTR3 | 7:100781190-100781216 | 0.01058925 |
|------|-----------------------|------------|

|      |                       |             |
|------|-----------------------|-------------|
| UTR3 | 7:100781429-100781443 | 0.024454929 |
|------|-----------------------|-------------|

|      |                       |             |
|------|-----------------------|-------------|
| UTR3 | 7:100782523-100782532 | 0.010437929 |
|------|-----------------------|-------------|

|                 |                               |                 |            |
|-----------------|-------------------------------|-----------------|------------|
| ENST00000223095 | ENSG00000106366<br>(SERPINE1) | hsa-miR-1277-5p | 0.96565924 |
|-----------------|-------------------------------|-----------------|------------|

|                 |                               |                     |             |
|-----------------|-------------------------------|---------------------|-------------|
| UTR3            | 7:100782182-100782193         |                     | 0.025271695 |
| UTR3            | 7:100782197-100782216         |                     | 0.01619347  |
| UTR3            | 7:100782230-100782245         |                     | 0.023771843 |
| ENST00000223095 | ENSG00000106366<br>(SERPINE1) | hsa-miR-4795-<br>3p | 0.956862971 |
| UTR3            | 7:100781549-100781571         |                     | 0.015891226 |
| UTR3            | 7:100782017-100782042         |                     | 0.009771618 |
| UTR3            | 7:100782214-100782223         |                     | 0.005794902 |
| UTR3            | 7:100782505-100782511         |                     | 0.029902483 |
| ENST00000223095 | ENSG00000106366<br>(SERPINE1) | hsa-miR-5681a       | 0.956059381 |
| UTR3            | 7:100781201-100781226         |                     | 0.049508561 |
| UTR3            | 7:100782351-100782365         |                     | 0.006065312 |



|                 |                               |                 |             |
|-----------------|-------------------------------|-----------------|-------------|
| UTR3            | 7:100782351-100782369         | 0.005470958     |             |
| ENST00000223095 | ENSG00000106366<br>(SERPINE1) | hsa-miR-190a-3p | 0.953698689 |
| UTR3            | 7:100782182-100782188         | 0.009644948     |             |
| UTR3            | 7:100782184-100782190         | 0.008130071     |             |
| UTR3            | 7:100782196-100782213         | 0.009066539     |             |
| UTR3            | 7:100782219-100782236         | 0.008427183     |             |
| UTR3            | 7:100782219-100782238         | 0.008087967     |             |
| UTR3            | 7:100782229-100782240         | 0.008681286     |             |
| UTR3            | 7:100782229-100782242         | 0.008111133     |             |
| ENST00000223095 | ENSG00000106366<br>(SERPINE1) | hsa-miR-627-3p  | 0.9519028   |
| UTR3            | 7:100780779-100780796         | 0.054750156     |             |

|                 |                               |                |             |
|-----------------|-------------------------------|----------------|-------------|
| UTR3            | 7:100780840-100780855         | 0.004746218    |             |
| ENST00000223095 | ENSG00000106366<br>(SERPINE1) | hsa-miR-942-5p | 0.943661625 |
| UTR3            | 7:100780756-100780780         | 0.006275233    |             |
| UTR3            | 7:100780819-100780834         | 0.042528151    |             |
| UTR3            | 7:100780927-100780949         | 0.007966047    |             |
| ENST00000223095 | ENSG00000106366<br>(SERPINE1) | hsa-miR-583    | 0.935994236 |
| UTR3            | 7:100780801-100780818         | 0.007716477    |             |
| UTR3            | 7:100781586-100781600         | 0.002062419    |             |
| UTR3            | 7:100781724-100781733         | 0.002255503    |             |
| UTR3            | 7:100782163-100782177         | 0.003216421    |             |
| UTR3            | 7:100782321-100782346         | 0.035041481    |             |

|                 |                               |                      |             |
|-----------------|-------------------------------|----------------------|-------------|
| UTR3            | 7:100782340-100782351         | 0.003384174          |             |
| UTR3            | 7:100780323-100780344         | 0.015866171          |             |
| ENST00000223095 | ENSG00000106366<br>(SERPINE1) | hsa-miR-548ah-<br>5p | 0.926505806 |
| UTR3            | 7:100781140-100781158         | 0.002794142          |             |
| UTR3            | 7:100782075-100782097         | 0.003172988          |             |
| UTR3            | 7:100782453-100782473         | 0.046157712          |             |
| ENST00000223095 | ENSG00000106366<br>(SERPINE1) | hsa-miR-6873-<br>3p  | 0.925409107 |
| UTR3            | 7:100780810-100780832         | 0.007785077          |             |
| UTR3            | 7:100780938-100780948         | 0.007606214          |             |
| UTR3            | 7:100781526-100781546         | 0.029700946          |             |
| UTR3            | 7:100781526-100781552         | 0.001158619          |             |

|                 |                               |                     |             |
|-----------------|-------------------------------|---------------------|-------------|
| UTR3            | 7:100781985-100782007         | 0.002062749         |             |
| UTR3            | 7:100781985-100782008         | 0.003549793         |             |
| ENST00000223095 | ENSG00000106366<br>(SERPINE1) | hsa-miR-6833-<br>3p | 0.921957818 |
| UTR3            | 7:100780819-100780833         | 0.008853651         |             |
| UTR3            | 7:100780930-100780949         | 0.00877637          |             |
| UTR3            | 7:100781526-100781547         | 0.0250342           |             |
| UTR3            | 7:100781526-100781552         | 0.002057273         |             |
| UTR3            | 7:100781989-100782008         | 0.004593504         |             |
| UTR3            | 7:100781989-100782008         | 0.001748078         |             |
| ENST00000223095 | ENSG00000106366<br>(SERPINE1) | hsa-miR-6740-<br>3p | 0.921387221 |
| UTR3            | 7:100780819-100780836         | 0.050432155         |             |

|                 |                               |                 |             |
|-----------------|-------------------------------|-----------------|-------------|
| UTR3            | 7:100773910-100773925         | 0.006921725     |             |
| ENST00000223095 | ENSG00000106366<br>(SERPINE1) | hsa-miR-34a-5p  | 0.905589079 |
| UTR3            | 7:100781145-100781169         | 0.001730397     |             |
| UTR3            | 7:100781150-100781174         | 0.004608328     |             |
| UTR3            | 7:100781664-100781689         | 0.041319561     |             |
| ENST00000223095 | ENSG00000106366<br>(SERPINE1) | hsa-miR-3925-3p | 0.905236509 |
| UTR3            | 7:100780748-100780762         | 0.041749797     |             |
| UTR3            | 7:100781357-100781374         | 0.005841203     |             |
| ENST00000223095 | ENSG00000106366<br>(SERPINE1) | hsa-miR-937-5p  | 0.893200844 |
| UTR3            | 7:100781791-100781813         | 0.002757756     |             |
| UTR3            | 7:100781896-100781921         | 0.013473886     |             |

|                 |                               |                 |             |
|-----------------|-------------------------------|-----------------|-------------|
| UTR3            | 7:100781921-100781940         | 0.02918642      |             |
| ENST00000223095 | ENSG00000106366<br>(SERPINE1) | hsa-miR-8063    | 0.891001385 |
| UTR3            | 7:100781345-100781371         | 0.004845774     |             |
| UTR3            | 7:100782352-100782376         | 0.004253444     |             |
| UTR3            | 7:100782364-100782381         | 0.023908285     |             |
| UTR3            | 7:100782460-100782475         | 0.01203709      |             |
| ENST00000223095 | ENSG00000106366<br>(SERPINE1) | hsa-miR-449a    | 0.890923422 |
| UTR3            | 7:100781150-100781169         | 0.001667749     |             |
| UTR3            | 7:100781150-100781174         | 0.003537364     |             |
| UTR3            | 7:100781664-100781689         | 0.039826364     |             |
| ENST00000223095 | ENSG00000106366<br>(SERPINE1) | hsa-miR-642a-3p | 0.886393906 |

|                 |                               |                      |             |
|-----------------|-------------------------------|----------------------|-------------|
| UTR3            | 7:100781592-100781611         | 0.00358874           |             |
| UTR3            | 7:100781931-100781951         | 0.040694445          |             |
| ENST00000223095 | ENSG00000106366<br>(SERPINE1) | hsa-miR-4713-<br>5p  | 0.882336243 |
| UTR3            | 7:100780929-100780946         | 0.007249487          |             |
| UTR3            | 7:100782252-100782267         | 0.036385136          |             |
| ENST00000223095 | ENSG00000106366<br>(SERPINE1) | hsa-miR-143-3p       | 0.880986481 |
| UTR3            | 7:100781206-100781232         | 0.039294929          |             |
| UTR3            | 7:100781322-100781337         | 0.002314947          |             |
| UTR3            | 7:100781605-100781622         | 0.001813306          |             |
| ENST00000223095 | ENSG00000106366<br>(SERPINE1) | hsa-miR-4433b-<br>5p | 0.879250919 |
| UTR3            | 7:100780727-100780753         | 0.039605692          |             |

|                 |                               |                     |             |
|-----------------|-------------------------------|---------------------|-------------|
| UTR3            | 7:100781640-100781663         | 0.002492038         |             |
| UTR3            | 7:100781790-100781805         | 0.0010566           |             |
| ENST00000223095 | ENSG00000106366<br>(SERPINE1) | hsa-miR-642b-<br>3p | 0.879127526 |
| UTR3            | 7:100781590-100781611         | 0.003481363         |             |
| UTR3            | 7:100781931-100781951         | 0.039653981         |             |
| ENST00000223095 | ENSG00000106366<br>(SERPINE1) | hsa-miR-494-3p      | 0.877294909 |
| UTR3            | 7:100781580-100781596         | 0.002545872         |             |
| UTR3            | 7:100782486-100782500         | 0.039529726         |             |
| UTR3            | 7:100771789-100771805         | 0.006648048         |             |
| ENST00000223095 | ENSG00000106366<br>(SERPINE1) | hsa-miR-5195-<br>3p | 0.861871702 |
| UTR3            | 7:100780738-100780761         | 0.027695242         |             |



|                 |                               |                       |             |
|-----------------|-------------------------------|-----------------------|-------------|
| UTR3            | 7:100782364-100782388         | 0.012935057           |             |
| ENST00000223095 | ENSG00000106366<br>(SERPINE1) | hsa-miR-450a-2-<br>3p | 0.860651033 |
| UTR3            | 7:100781288-100781301         | 0.003227189           |             |
| UTR3            | 7:100781451-100781478         | 0.003439338           |             |
| UTR3            | 7:100781891-100781906         | 0.033796808           |             |
| ENST00000223095 | ENSG00000106366<br>(SERPINE1) | hsa-miR-548e-<br>5p   | 0.857714087 |
| UTR3            | 7:100781085-100781112         | 0.008230865           |             |
| UTR3            | 7:100782440-100782465         | 0.016752853           |             |
| UTR3            | 7:100782459-100782474         | 0.01508286            |             |
| ENST00000223095 | ENSG00000106366<br>(SERPINE1) | hsa-miR-3620-<br>3p   | 0.851869791 |
| UTR3            | 7:100781909-100781916         | 0.03826738            |             |

|                 |                               |                |             |
|-----------------|-------------------------------|----------------|-------------|
| UTR3            | 7:100781977-100782002         | 0.001029555    |             |
| ENST00000223095 | ENSG00000106366<br>(SERPINE1) | hsa-miR-486-5p | 0.848971624 |
| UTR3            | 7:100781089-100781105         | 0.004321364    |             |
| UTR3            | 7:100781244-100781272         | 0.005534687    |             |
| UTR3            | 7:100781886-100781913         | 0.004723331    |             |
| UTR3            | 7:100782389-100782412         | 0.024345174    |             |
| ENST00000223095 | ENSG00000106366<br>(SERPINE1) | hsa-miR-139-3p | 0.84525307  |
| UTR3            | 7:100780863-100780877         | 0.011006012    |             |
| UTR3            | 7:100780902-100780928         | 0.006103746    |             |
| UTR3            | 7:100780961-100780978         | 0.017129362    |             |
| UTR3            | 7:100782306-100782330         | 0.004216151    |             |

|                 |                               |                     |             |
|-----------------|-------------------------------|---------------------|-------------|
| ENST00000223095 | ENSG00000106366<br>(SERPINE1) | hsa-miR-5689        | 0.843261737 |
| UTR3            | 7:100782446-100782462         | 0.038207744         |             |
| ENST00000223095 | ENSG00000106366<br>(SERPINE1) | hsa-miR-6882-<br>5p | 0.840420999 |
| UTR3            | 7:100781136-100781164         | 0.004109333         |             |
| UTR3            | 7:100781366-100781387         | 0.033749692         |             |
| ENST00000223095 | ENSG00000106366<br>(SERPINE1) | hsa-miR-149-3p      | 0.838501942 |
| UTR3            | 7:100780902-100780920         | 0.004375449         |             |
| UTR3            | 7:100780941-100780967         | 0.003346436         |             |
| UTR3            | 7:100781245-100781262         | 0.00581052          |             |
| UTR3            | 7:100781316-100781340         | 0.001045278         |             |
| UTR3            | 7:100781325-100781343         | 0.023048604         |             |

|                 |                               |                 |             |
|-----------------|-------------------------------|-----------------|-------------|
| ENST00000223095 | ENSG00000106366<br>(SERPINE1) | hsa-miR-148a-3p | 0.832001974 |
|-----------------|-------------------------------|-----------------|-------------|

|      |                       |             |
|------|-----------------------|-------------|
| UTR3 | 7:100781050-100781069 | 0.002902166 |
|------|-----------------------|-------------|

|      |                       |             |
|------|-----------------------|-------------|
| UTR3 | 7:100781231-100781251 | 0.001961603 |
|------|-----------------------|-------------|

|      |                       |             |
|------|-----------------------|-------------|
| UTR3 | 7:100782318-100782334 | 0.003231279 |
|------|-----------------------|-------------|

|      |                       |             |
|------|-----------------------|-------------|
| UTR3 | 7:100782371-100782387 | 0.028759131 |
|------|-----------------------|-------------|

|                 |                               |              |             |
|-----------------|-------------------------------|--------------|-------------|
| ENST00000223095 | ENSG00000106366<br>(SERPINE1) | hsa-miR-5702 | 0.830357909 |
|-----------------|-------------------------------|--------------|-------------|

|      |                       |             |
|------|-----------------------|-------------|
| UTR3 | 7:100780803-100780815 | 0.004919744 |
|------|-----------------------|-------------|

|      |                       |             |
|------|-----------------------|-------------|
| UTR3 | 7:100781795-100781813 | 0.001791076 |
|------|-----------------------|-------------|

|      |                       |             |
|------|-----------------------|-------------|
| UTR3 | 7:100781909-100781920 | 0.010897069 |
|------|-----------------------|-------------|

|      |                       |             |
|------|-----------------------|-------------|
| UTR3 | 7:100781929-100781939 | 0.019054794 |
|------|-----------------------|-------------|

|                 |                               |              |           |
|-----------------|-------------------------------|--------------|-----------|
| ENST00000223095 | ENSG00000106366<br>(SERPINE1) | hsa-miR-4311 | 0.8294151 |
|-----------------|-------------------------------|--------------|-----------|

|                 |                               |              |             |
|-----------------|-------------------------------|--------------|-------------|
| UTR3            | 7:100780799-100780819         | 0.011268698  |             |
| UTR3            | 7:100781712-100781733         | 0.001456111  |             |
| UTR3            | 7:100782155-100782177         | 0.00840966   |             |
| UTR3            | 7:100782329-100782347         | 0.015419064  |             |
| ENST00000223095 | ENSG00000106366<br>(SERPINE1) | hsa-miR-3977 | 0.827006728 |
| UTR3            | 7:100780940-100780959         | 0.024271334  |             |
| UTR3            | 7:100781377-100781402         | 0.012005536  |             |
| ENST00000223095 | ENSG00000106366<br>(SERPINE1) | hsa-miR-4269 | 0.822116229 |
| UTR3            | 7:100780981-100780998         | 0.00194273   |             |
| UTR3            | 7:100781101-100781120         | 0.030366483  |             |
| UTR3            | 7:100781150-100781172         | 0.003415089  |             |

|                 |                               |                     |             |
|-----------------|-------------------------------|---------------------|-------------|
| ENST00000223095 | ENSG00000106366<br>(SERPINE1) | hsa-miR-6764-<br>5p | 0.819392395 |
|-----------------|-------------------------------|---------------------|-------------|

|      |                       |             |
|------|-----------------------|-------------|
| UTR3 | 7:100780924-100780943 | 0.030328506 |
|------|-----------------------|-------------|

|      |                       |             |
|------|-----------------------|-------------|
| UTR3 | 7:100782133-100782151 | 0.003582763 |
|------|-----------------------|-------------|

|      |                       |             |
|------|-----------------------|-------------|
| UTR3 | 7:100778800-100778826 | 0.009378793 |
|------|-----------------------|-------------|

|                 |                               |                     |             |
|-----------------|-------------------------------|---------------------|-------------|
| ENST00000223095 | ENSG00000106366<br>(SERPINE1) | hsa-miR-148b-<br>3p | 0.818363233 |
|-----------------|-------------------------------|---------------------|-------------|

|      |                       |             |
|------|-----------------------|-------------|
| UTR3 | 7:100781043-100781069 | 0.002880755 |
|------|-----------------------|-------------|

|      |                       |             |
|------|-----------------------|-------------|
| UTR3 | 7:100782318-100782334 | 0.003231279 |
|------|-----------------------|-------------|

|      |                       |             |
|------|-----------------------|-------------|
| UTR3 | 7:100782371-100782387 | 0.029196248 |
|------|-----------------------|-------------|

|                 |                               |                |            |
|-----------------|-------------------------------|----------------|------------|
| ENST00000223095 | ENSG00000106366<br>(SERPINE1) | hsa-miR-152-3p | 0.81512564 |
|-----------------|-------------------------------|----------------|------------|

|      |                       |             |
|------|-----------------------|-------------|
| UTR3 | 7:100781042-100781069 | 0.002786637 |
|------|-----------------------|-------------|

|      |                       |             |
|------|-----------------------|-------------|
| UTR3 | 7:100782319-100782334 | 0.002971852 |
|------|-----------------------|-------------|

|                 |                               |                 |             |
|-----------------|-------------------------------|-----------------|-------------|
| UTR3            | 7:100782371-100782387         | 0.029196248     |             |
| ENST00000223095 | ENSG00000106366<br>(SERPINE1) | hsa-miR-34c-5p  | 0.814115119 |
| UTR3            | 7:100781150-100781170         | 0.002411372     |             |
| UTR3            | 7:100781665-100781688         | 0.032433999     |             |
| ENST00000223095 | ENSG00000106366<br>(SERPINE1) | hsa-miR-6809-3p | 0.813365483 |
| UTR3            | 7:100780819-100780833         | 0.018204809     |             |
| UTR3            | 7:100780930-100780949         | 0.007393292     |             |
| UTR3            | 7:100781540-100781546         | 0.004033458     |             |
| UTR3            | 7:100781540-100781552         | 0.005132976     |             |
| ENST00000223095 | ENSG00000106366<br>(SERPINE1) | hsa-miR-6825-5p | 0.813118475 |
| UTR3            | 7:100781248-100781264         | 0.005908855     |             |

|                 |                               |                     |             |
|-----------------|-------------------------------|---------------------|-------------|
| UTR3            | 7:100781322-100781345         | 0.024147623         |             |
| UTR3            | 7:100781878-100781904         | 0.004681475         |             |
| ENST00000223095 | ENSG00000106366<br>(SERPINE1) | hsa-miR-6763-<br>5p | 0.811818804 |
| UTR3            | 7:100781248-100781265         | 0.006078236         |             |
| UTR3            | 7:100781319-100781346         | 0.019261608         |             |
| UTR3            | 7:100781885-100781904         | 0.009258694         |             |
| ENST00000223095 | ENSG00000106366<br>(SERPINE1) | hsa-miR-3153        | 0.81104848  |
| UTR3            | 7:100781725-100781739         | 0.005035744         |             |
| UTR3            | 7:100781877-100781903         | 0.02948051          |             |
| ENST00000223095 | ENSG00000106366<br>(SERPINE1) | hsa-miR-6730-<br>5p | 0.803825582 |
| UTR3            | 7:100780810-100780820         | 0.007658443         |             |



|                 |                               |                |             |
|-----------------|-------------------------------|----------------|-------------|
| UTR3            | 7:100781217-100781227         |                | 0.009870424 |
| UTR3            | 7:100782320-100782348         |                | 0.005386617 |
| UTR3            | 7:100782339-100782365         |                | 0.005380421 |
| UTR3            | 7:100782348-100782369         |                | 0.005461022 |
| ENST00000223095 | ENSG00000106366<br>(SERPINE1) | hsa-miR-676-3p | 0.803163924 |
| UTR3            | 7:100781789-100781806         |                | 0.002023686 |
| UTR3            | 7:100781808-100781824         |                | 0.005765452 |
| UTR3            | 7:100781871-100781893         |                | 0.010280204 |
| UTR3            | 7:100782530-100782544         |                | 0.015619094 |
| ENST00000223095 | ENSG00000106366<br>(SERPINE1) | hsa-miR-541-3p | 0.80305785  |
| UTR3            | 7:100782300-100782321         |                | 0.033097131 |

|                 |                               |                     |             |
|-----------------|-------------------------------|---------------------|-------------|
| UTR3            | 7:100771759-100771774         | 0.003508486         |             |
| ENST00000223095 | ENSG00000106366<br>(SERPINE1) | hsa-miR-4770        | 0.801958764 |
| UTR3            | 7:100781206-100781232         | 0.031355584         |             |
| UTR3            | 7:100781322-100781337         | 0.002208546         |             |
| ENST00000223095 | ENSG00000106366<br>(SERPINE1) | hsa-miR-3620-<br>5p | 0.800656831 |
| UTR3            | 7:100781021-100781041         | 0.003322177         |             |
| UTR3            | 7:100781655-100781682         | 0.002894824         |             |
| UTR3            | 7:100782115-100782131         | 0.002736555         |             |
| UTR3            | 7:100782304-100782319         | 0.024476925         |             |
| ENST00000223095 | ENSG00000106366<br>(SERPINE1) | hsa-miR-10a-5p      | 0.796589119 |
| UTR3            | 7:100781890-100781915         | 0.030531703         |             |

|                 |                               |                 |             |
|-----------------|-------------------------------|-----------------|-------------|
| UTR3            | 7:100782045-100782069         | 0.002485381     |             |
| ENST00000223095 | ENSG00000106366<br>(SERPINE1) | hsa-miR-10b-5p  | 0.796589119 |
| UTR3            | 7:100781890-100781915         | 0.030531703     |             |
| UTR3            | 7:100782045-100782069         | 0.002485381     |             |
| ENST00000223095 | ENSG00000106366<br>(SERPINE1) | hsa-miR-449b-5p | 0.795275996 |
| UTR3            | 7:100781150-100781170         | 0.002447674     |             |
| UTR3            | 7:100781664-100781688         | 0.030437277     |             |
| ENST00000223095 | ENSG00000106366<br>(SERPINE1) | hsa-miR-6752-5p | 0.795260505 |
| UTR3            | 7:100781457-100781475         | 0.029744328     |             |
| UTR3            | 7:100782142-100782169         | 0.003139067     |             |
| ENST00000223095 | ENSG00000106366<br>(SERPINE1) | hsa-miR-654-5p  | 0.794939037 |

|                 |                               |              |             |
|-----------------|-------------------------------|--------------|-------------|
| UTR3            | 7:100782312-100782321         | 0.032056509  |             |
| UTR3            | 7:100771764-100771774         | 0.004647293  |             |
| ENST00000223095 | ENSG00000106366<br>(SERPINE1) | hsa-miR-4450 | 0.794768556 |
| UTR3            | 7:100781244-100781264         | 0.001629698  |             |
| UTR3            | 7:100781330-100781345         | 0.002308638  |             |
| UTR3            | 7:100781883-100781904         | 0.00543628   |             |
| UTR3            | 7:100782317-100782343         | 0.023459442  |             |
| ENST00000223095 | ENSG00000106366<br>(SERPINE1) | hsa-miR-5093 | 0.794483963 |
| UTR3            | 7:100781936-100781957         | 0.032805556  |             |
| ENST00000223095 | ENSG00000106366<br>(SERPINE1) | hsa-miR-573  | 0.792639387 |
| UTR3            | 7:100781921-100781944         | 0.032621527  |             |

|                 |                               |                |             |
|-----------------|-------------------------------|----------------|-------------|
| ENST00000223095 | ENSG00000106366<br>(SERPINE1) | hsa-miR-656-3p | 0.789267252 |
|-----------------|-------------------------------|----------------|-------------|

|      |                       |             |
|------|-----------------------|-------------|
| UTR3 | 7:100781547-100781572 | 0.015225455 |
|------|-----------------------|-------------|

|      |                       |            |
|------|-----------------------|------------|
| UTR3 | 7:100782026-100782043 | 0.01115956 |
|------|-----------------------|------------|

|      |                       |             |
|------|-----------------------|-------------|
| UTR3 | 7:100782218-100782223 | 0.005903181 |
|------|-----------------------|-------------|

|                 |                               |             |             |
|-----------------|-------------------------------|-------------|-------------|
| ENST00000223095 | ENSG00000106366<br>(SERPINE1) | hsa-miR-609 | 0.786276832 |
|-----------------|-------------------------------|-------------|-------------|

|      |                       |             |
|------|-----------------------|-------------|
| UTR3 | 7:100781202-100781223 | 0.029909036 |
|------|-----------------------|-------------|

|      |                       |             |
|------|-----------------------|-------------|
| UTR3 | 7:100781638-100781653 | 0.002086818 |
|------|-----------------------|-------------|

|                 |                               |                |             |
|-----------------|-------------------------------|----------------|-------------|
| ENST00000223095 | ENSG00000106366<br>(SERPINE1) | hsa-miR-134-5p | 0.785887598 |
|-----------------|-------------------------------|----------------|-------------|

|      |                       |             |
|------|-----------------------|-------------|
| UTR3 | 7:100781131-100781147 | 0.031958022 |
|------|-----------------------|-------------|

|                 |                               |                |             |
|-----------------|-------------------------------|----------------|-------------|
| ENST00000223095 | ENSG00000106366<br>(SERPINE1) | hsa-miR-425-5p | 0.784172712 |
|-----------------|-------------------------------|----------------|-------------|

|      |                       |             |
|------|-----------------------|-------------|
| UTR3 | 7:100781927-100781954 | 0.031791938 |
|------|-----------------------|-------------|

|                 |                               |                     |             |
|-----------------|-------------------------------|---------------------|-------------|
| ENST00000223095 | ENSG00000106366<br>(SERPINE1) | hsa-miR-148b-<br>5p | 0.782356878 |
|-----------------|-------------------------------|---------------------|-------------|

|      |                       |             |
|------|-----------------------|-------------|
| UTR3 | 7:100781527-100781554 | 0.002965748 |
|------|-----------------------|-------------|

|      |                       |             |
|------|-----------------------|-------------|
| UTR3 | 7:100781881-100781898 | 0.028651367 |
|------|-----------------------|-------------|

|                 |                               |                     |             |
|-----------------|-------------------------------|---------------------|-------------|
| ENST00000223095 | ENSG00000106366<br>(SERPINE1) | hsa-miR-6857-<br>5p | 0.781939374 |
|-----------------|-------------------------------|---------------------|-------------|

|      |                       |             |
|------|-----------------------|-------------|
| UTR3 | 7:100781247-100781265 | 0.001405382 |
|------|-----------------------|-------------|

|      |                       |             |
|------|-----------------------|-------------|
| UTR3 | 7:100781453-100781477 | 0.002164388 |
|------|-----------------------|-------------|

|      |                       |             |
|------|-----------------------|-------------|
| UTR3 | 7:100781878-100781905 | 0.028007298 |
|------|-----------------------|-------------|

|                 |                               |              |             |
|-----------------|-------------------------------|--------------|-------------|
| ENST00000223095 | ENSG00000106366<br>(SERPINE1) | hsa-miR-548n | 0.774355642 |
|-----------------|-------------------------------|--------------|-------------|

|      |                       |            |
|------|-----------------------|------------|
| UTR3 | 7:100780827-100780847 | 0.00729816 |
|------|-----------------------|------------|

|      |                       |             |
|------|-----------------------|-------------|
| UTR3 | 7:100781091-100781112 | 0.004679775 |
|------|-----------------------|-------------|

|      |                       |             |
|------|-----------------------|-------------|
| UTR3 | 7:100782446-100782474 | 0.018881095 |
|------|-----------------------|-------------|

|                 |                               |              |             |
|-----------------|-------------------------------|--------------|-------------|
| ENST00000223095 | ENSG00000106366<br>(SERPINE1) | hsa-miR-4531 | 0.771245423 |
|-----------------|-------------------------------|--------------|-------------|

|      |                       |             |
|------|-----------------------|-------------|
| UTR3 | 7:100780864-100780877 | 0.004385417 |
|------|-----------------------|-------------|

|      |                       |             |
|------|-----------------------|-------------|
| UTR3 | 7:100780905-100780928 | 0.003402097 |
|------|-----------------------|-------------|

|      |                       |             |
|------|-----------------------|-------------|
| UTR3 | 7:100780953-100780978 | 0.006972477 |
|------|-----------------------|-------------|

|      |                       |            |
|------|-----------------------|------------|
| UTR3 | 7:100782311-100782330 | 0.01580952 |
|------|-----------------------|------------|

|                 |                               |                     |             |
|-----------------|-------------------------------|---------------------|-------------|
| ENST00000223095 | ENSG00000106366<br>(SERPINE1) | hsa-miR-1343-<br>3p | 0.767631267 |
|-----------------|-------------------------------|---------------------|-------------|

|      |                       |             |
|------|-----------------------|-------------|
| UTR3 | 7:100781084-100781106 | 0.003089262 |
|------|-----------------------|-------------|

|      |                       |             |
|------|-----------------------|-------------|
| UTR3 | 7:100781864-100781890 | 0.004430233 |
|------|-----------------------|-------------|

|      |                       |             |
|------|-----------------------|-------------|
| UTR3 | 7:100782109-100782134 | 0.022717042 |
|------|-----------------------|-------------|

|                 |                               |                      |             |
|-----------------|-------------------------------|----------------------|-------------|
| ENST00000223095 | ENSG00000106366<br>(SERPINE1) | hsa-miR-4666a-<br>5p | 0.766633082 |
|-----------------|-------------------------------|----------------------|-------------|

|      |                       |             |
|------|-----------------------|-------------|
| UTR3 | 7:100782386-100782407 | 0.003821669 |
|------|-----------------------|-------------|

|                 |                               |                     |             |
|-----------------|-------------------------------|---------------------|-------------|
| UTR3            | 7:100782483-100782489         | 0.026323543         |             |
| ENST00000223095 | ENSG00000106366<br>(SERPINE1) | hsa-miR-150-5p      | 0.766096367 |
| UTR3            | 7:100780927-100780945         | 0.006973748         |             |
| UTR3            | 7:100782081-100782103         | 0.006685377         |             |
| UTR3            | 7:100782260-100782266         | 0.016437094         |             |
| ENST00000223095 | ENSG00000106366<br>(SERPINE1) | hsa-miR-106a-<br>5p | 0.765853509 |
| UTR3            | 7:100782072-100782097         | 0.007424559         |             |
| UTR3            | 7:100782449-100782473         | 0.022649518         |             |
| ENST00000223095 | ENSG00000106366<br>(SERPINE1) | hsa-miR-378a-<br>5p | 0.765175639 |
| UTR3            | 7:100781090-100781106         | 0.00303355          |             |
| UTR3            | 7:100781612-100781625         | 0.00321962          |             |



|                 |                                               |                     |             |
|-----------------|-----------------------------------------------|---------------------|-------------|
| UTR3            | 7:100782107-100782134                         | 0.003421746         |             |
| UTR3            | 7:100782522-100782541                         | 0.02033744          |             |
| ENST00000223095 | ENSG00000106366<br>(SERPINE1)                 | hsa-miR-4656        | 0.763575164 |
| UTR3            | 7:100781656-100781681                         | 0.001054621         |             |
| UTR3            | 7:100782109-100782130                         | 0.001716536         |             |
| UTR3            | 7:100782299-100782318                         | 0.024699976         |             |
| UTR3            | 7:100779079;100780282-<br>100779082;100780300 | 0.012251369         |             |
| ENST00000223095 | ENSG00000106366<br>(SERPINE1)                 | hsa-miR-2116-<br>3p | 0.762394082 |
| UTR3            | 7:100780921-100780944                         | 0.003697272         |             |
| UTR3            | 7:100782082-100782103                         | 0.005520466         |             |
| UTR3            | 7:100782098-100782116                         | 0.001795028         |             |

|                 |                               |                 |             |
|-----------------|-------------------------------|-----------------|-------------|
| UTR3            | 7:100782258-100782265         | 0.018747607     |             |
| ENST00000223095 | ENSG00000106366<br>(SERPINE1) | hsa-miR-224-5p  | 0.762128251 |
| UTR3            | 7:100781369-100781386         | 0.029736398     |             |
| ENST00000223095 | ENSG00000106366<br>(SERPINE1) | hsa-miR-4646-3p | 0.760284233 |
| UTR3            | 7:100780729-100780754         | 0.029570593     |             |
| ENST00000223095 | ENSG00000106366<br>(SERPINE1) | hsa-miR-8064    | 0.757236157 |
| UTR3            | 7:100781096-100781117         | 0.00582646      |             |
| UTR3            | 7:100781336-100781357         | 0.023471966     |             |
| ENST00000223095 | ENSG00000106366<br>(SERPINE1) | hsa-miR-6842-3p | 0.757208745 |
| UTR3            | 7:100781619-100781635         | 0.00563068      |             |
| UTR3            | 7:100782045-100782063         | 0.021183293     |             |

|                 |                               |                     |             |
|-----------------|-------------------------------|---------------------|-------------|
| UTR3            | 7:100782379-100782403         | 0.002482017         |             |
| ENST00000223095 | ENSG00000106366<br>(SERPINE1) | hsa-miR-6852-<br>3p | 0.754890232 |
| UTR3            | 7:100780896-100780902         | 0.006689343         |             |
| UTR3            | 7:100781798-100781823         | 0.01056538          |             |
| UTR3            | 7:100781868-100781892         | 0.004099112         |             |
| UTR3            | 7:100781963-100781982         | 0.00331646          |             |
| UTR3            | 7:100782525-100782543         | 0.004420239         |             |
| ENST00000223095 | ENSG00000106366<br>(SERPINE1) | hsa-miR-6879-<br>3p | 0.750534037 |
| UTR3            | 7:100781169-100781195         | 0.002423079         |             |
| UTR3            | 7:100781359-100781383         | 0.005831009         |             |
| UTR3            | 7:100781903-100781917         | 0.014057383         |             |

|                 |                               |                 |             |
|-----------------|-------------------------------|-----------------|-------------|
| UTR3            | 7:100781911-100781936         | 0.006396555     |             |
| ENST00000223095 | ENSG00000106366<br>(SERPINE1) | hsa-miR-6719-3p | 0.747412723 |
| UTR3            | 7:100781427-100781451         | 0.013691503     |             |
| UTR3            | 7:100782525-100782540         | 0.014745184     |             |
| ENST00000223095 | ENSG00000106366<br>(SERPINE1) | hsa-miR-3118    | 0.743975692 |
| UTR3            | 7:100781123-100781147         | 0.028140457     |             |
| ENST00000223095 | ENSG00000106366<br>(SERPINE1) | hsa-miR-4753-3p | 0.742424568 |
| UTR3            | 7:100780812-100780832         | 0.011178365     |             |
| UTR3            | 7:100780927-100780948         | 0.00309384      |             |
| UTR3            | 7:100781528-100781552         | 0.013735419     |             |
| ENST00000223095 | ENSG00000106366<br>(SERPINE1) | hsa-miR-196b-5p | 0.740873888 |

|                 |                               |                     |             |
|-----------------|-------------------------------|---------------------|-------------|
| UTR3            | 7:100781479-100781503         | 0.001999781         |             |
| UTR3            | 7:100782011-100782032         | 0.02587557          |             |
| ENST00000223095 | ENSG00000106366<br>(SERPINE1) | hsa-miR-7159-<br>5p | 0.739589791 |
| UTR3            | 7:100782432-100782453         | 0.027766207         |             |
| ENST00000223095 | ENSG00000106366<br>(SERPINE1) | hsa-miR-4302        | 0.738600827 |
| UTR3            | 7:100781229-100781251         | 0.002545336         |             |
| UTR3            | 7:100781668-100781686         | 0.010540899         |             |
| UTR3            | 7:100782368-100782387         | 0.014596151         |             |
| ENST00000223095 | ENSG00000106366<br>(SERPINE1) | hsa-miR-1276        | 0.737296966 |
| UTR3            | 7:100780813-100780818         | 0.008029756         |             |
| UTR3            | 7:100781720-100781733         | 0.001428314         |             |

|                 |                               |                 |             |
|-----------------|-------------------------------|-----------------|-------------|
| UTR3            | 7:100782165-100782178         |                 | 0.0074278   |
| UTR3            | 7:100782214-100782228         |                 | 0.003917485 |
| UTR3            | 7:100782322-100782346         |                 | 0.006768831 |
| ENST00000223095 | ENSG00000106366<br>(SERPINE1) | hsa-miR-153-5p  | 0.735718407 |
| UTR3            | 7:100782268-100782288         |                 | 0.005740472 |
| UTR3            | 7:100782472-100782495         |                 | 0.021698769 |
| ENST00000223095 | ENSG00000106366<br>(SERPINE1) | hsa-miR-3613-3p | 0.735345441 |
| UTR3            | 7:100780821-100780848         |                 | 0.007338874 |
| UTR3            | 7:100781086-100781113         |                 | 0.004777744 |
| UTR3            | 7:100782351-100782375         |                 | 0.015291286 |
| ENST00000223095 | ENSG00000106366<br>(SERPINE1) | hsa-miR-519c-3p | 0.731499972 |

|                 |                               |                     |             |
|-----------------|-------------------------------|---------------------|-------------|
| UTR3            | 7:100782089-100782097         | 0.010896821         |             |
| UTR3            | 7:100782449-100782472         | 0.016189617         |             |
| ENST00000223095 | ENSG00000106366<br>(SERPINE1) | hsa-miR-519d-<br>3p | 0.731019026 |
| UTR3            | 7:100782073-100782098         | 0.011689438         |             |
| UTR3            | 7:100782460-100782472         | 0.015357002         |             |
| ENST00000223095 | ENSG00000106366<br>(SERPINE1) | hsa-miR-519b-<br>3p | 0.730120544 |
| UTR3            | 7:100782077-100782097         | 0.010974121         |             |
| UTR3            | 7:100782458-100782472         | 0.015997716         |             |
| ENST00000223095 | ENSG00000106366<br>(SERPINE1) | hsa-miR-7110-<br>3p | 0.729821255 |
| UTR3            | 7:100781520-100781545         | 0.014717419         |             |
| UTR3            | 7:100781985-100782006         | 0.001501586         |             |

|                 |                               |                     |             |
|-----------------|-------------------------------|---------------------|-------------|
| UTR3            | 7:100781985-100782008         |                     | 0.008588356 |
| UTR3            | 7:100773881-100773893         |                     | 0.01019625  |
| ENST00000223095 | ENSG00000106366<br>(SERPINE1) | hsa-miR-6783-<br>3p | 0.726774705 |
| UTR3            | 7:100781864-100781890         |                     | 0.00428711  |
| UTR3            | 7:100782109-100782134         |                     | 0.022408278 |
| ENST00000223095 | ENSG00000106366<br>(SERPINE1) | hsa-miR-4306        | 0.726340232 |
| UTR3            | 7:100780868-100780877         |                     | 0.004083175 |
| UTR3            | 7:100780881-100780893         |                     | 0.006167539 |
| UTR3            | 7:100780914-100780928         |                     | 0.002574168 |
| UTR3            | 7:100780961-100780978         |                     | 0.005450141 |
| UTR3            | 7:100781311-100781322         |                     | 0.001637292 |



|                 |                                               |                |             |
|-----------------|-----------------------------------------------|----------------|-------------|
| UTR3            | 7:100782314-100782330                         | 0.005258227    |             |
| UTR3            | 7:100778867;100778996-<br>100778875;100779011 | 0.007162562    |             |
| ENST00000223095 | ENSG00000106366<br>(SERPINE1)                 | hsa-miR-186-5p | 0.726181944 |
| UTR3            | 7:100781580-100781600                         | 0.003341787    |             |
| UTR3            | 7:100782331-100782351                         | 0.007486211    |             |
| UTR3            | 7:100782339-100782363                         | 0.005183556    |             |
| UTR3            | 7:100782341-100782367                         | 0.005403993    |             |
| UTR3            | 7:100782346-100782371                         | 0.005231086    |             |
| ENST00000223095 | ENSG00000106366<br>(SERPINE1)                 | hsa-miR-548an  | 0.724761706 |
| UTR3            | 7:100780827-100780846                         | 0.02341227     |             |
| UTR3            | 7:100781401-100781419                         | 0.003117812    |             |

|                 |                               |                |             |
|-----------------|-------------------------------|----------------|-------------|
| ENST00000223095 | ENSG00000106366<br>(SERPINE1) | hsa-miR-510-3p | 0.723572764 |
|-----------------|-------------------------------|----------------|-------------|

|      |                       |            |
|------|-----------------------|------------|
| UTR3 | 7:100781924-100781946 | 0.00592147 |
|------|-----------------------|------------|

|      |                       |            |
|------|-----------------------|------------|
| UTR3 | 7:100782484-100782501 | 0.02051133 |
|------|-----------------------|------------|

|                 |                               |                |             |
|-----------------|-------------------------------|----------------|-------------|
| ENST00000223095 | ENSG00000106366<br>(SERPINE1) | hsa-miR-627-5p | 0.722212065 |
|-----------------|-------------------------------|----------------|-------------|

|      |                       |             |
|------|-----------------------|-------------|
| UTR3 | 7:100781805-100781813 | 0.009063749 |
|------|-----------------------|-------------|

|      |                       |             |
|------|-----------------------|-------------|
| UTR3 | 7:100781899-100781921 | 0.006804113 |
|------|-----------------------|-------------|

|      |                       |             |
|------|-----------------------|-------------|
| UTR3 | 7:100781924-100781940 | 0.010453919 |
|------|-----------------------|-------------|

|                 |                               |                |             |
|-----------------|-------------------------------|----------------|-------------|
| ENST00000223095 | ENSG00000106366<br>(SERPINE1) | hsa-miR-629-3p | 0.721750991 |
|-----------------|-------------------------------|----------------|-------------|

|      |                       |             |
|------|-----------------------|-------------|
| UTR3 | 7:100781526-100781553 | 0.003400887 |
|------|-----------------------|-------------|

|      |                       |             |
|------|-----------------------|-------------|
| UTR3 | 7:100782256-100782268 | 0.022883352 |
|------|-----------------------|-------------|

|                 |                               |               |             |
|-----------------|-------------------------------|---------------|-------------|
| ENST00000223095 | ENSG00000106366<br>(SERPINE1) | hsa-miR-548aw | 0.721655894 |
|-----------------|-------------------------------|---------------|-------------|

|                 |                               |                     |             |
|-----------------|-------------------------------|---------------------|-------------|
| UTR3            | 7:100782250-100782273         | 0.007392903         |             |
| UTR3            | 7:100782374-100782384         | 0.018883596         |             |
| ENST00000223095 | ENSG00000106366<br>(SERPINE1) | hsa-miR-4417        | 0.721507854 |
| UTR3            | 7:100781025-100781042         | 0.002891767         |             |
| UTR3            | 7:100781663-100781682         | 0.002923337         |             |
| UTR3            | 7:100782306-100782320         | 0.020449353         |             |
| ENST00000223095 | ENSG00000106366<br>(SERPINE1) | hsa-miR-4700-<br>5p | 0.72091557  |
| UTR3            | 7:100781245-100781265         | 0.003381828         |             |
| UTR3            | 7:100781322-100781347         | 0.022834484         |             |
| ENST00000223095 | ENSG00000106366<br>(SERPINE1) | hsa-miR-5571-<br>5p | 0.719879718 |
| UTR3            | 7:100780779-100780799         | 0.008371815         |             |

|                 |                               |                     |             |
|-----------------|-------------------------------|---------------------|-------------|
| UTR3            | 7:100782256-100782270         | 0.010702948         |             |
| UTR3            | 7:100782434-100782456         | 0.007057497         |             |
| ENST00000223095 | ENSG00000106366<br>(SERPINE1) | hsa-miR-6865-<br>5p | 0.719255062 |
| UTR3            | 7:100780907-100780932         | 0.002259464         |             |
| UTR3            | 7:100781674-100781692         | 0.023822203         |             |
| ENST00000223095 | ENSG00000106366<br>(SERPINE1) | hsa-miR-196a-<br>5p | 0.718193945 |
| UTR3            | 7:100781479-100781503         | 0.002378739         |             |
| UTR3            | 7:100782011-100782032         | 0.023617139         |             |
| ENST00000223095 | ENSG00000106366<br>(SERPINE1) | hsa-miR-185-5p      | 0.715063469 |
| UTR3            | 7:100780864-100780877         | 0.003908891         |             |
| UTR3            | 7:100780881-100780893         | 0.006167539         |             |

|                 |                                               |                     |             |
|-----------------|-----------------------------------------------|---------------------|-------------|
| UTR3            | 7:100780905-100780928                         | 0.002179067         |             |
| UTR3            | 7:100780960-100780978                         | 0.005419617         |             |
| UTR3            | 7:100781304-100781322                         | 0.001542223         |             |
| UTR3            | 7:100782311-100782330                         | 0.005000923         |             |
| UTR3            | 7:100778867;100778996-<br>100778875;100779011 | 0.007162562         |             |
| ENST00000223095 | ENSG00000106366<br>(SERPINE1)                 | hsa-miR-519a-<br>3p | 0.713673753 |
| UTR3            | 7:100782072-100782097                         | 0.011193023         |             |
| UTR3            | 7:100782467-100782472                         | 0.014439586         |             |
| ENST00000223095 | ENSG00000106366<br>(SERPINE1)                 | hsa-miR-3133        | 0.708115406 |
| UTR3            | 7:100782223-100782228                         | 0.004551498         |             |
| UTR3            | 7:100782345-100782351                         | 0.005402735         |             |

|                 |                               |                 |             |
|-----------------|-------------------------------|-----------------|-------------|
| UTR3            | 7:100782352-100782363         | 0.005231437     |             |
| UTR3            | 7:100782352-100782367         | 0.005161163     |             |
| UTR3            | 7:100782352-100782371         | 0.004843747     |             |
| ENST00000223095 | ENSG00000106366<br>(SERPINE1) | hsa-miR-141-3p  | 0.707945317 |
| UTR3            | 7:100780785-100780808         | 0.022896105     |             |
| UTR3            | 7:100781571-100781594         | 0.002281027     |             |
| ENST00000223095 | ENSG00000106366<br>(SERPINE1) | hsa-miR-6731-3p | 0.707765931 |
| UTR3            | 7:100781429-100781436         | 0.016421203     |             |
| UTR3            | 7:100781823-100781849         | 0.003290554     |             |
| UTR3            | 7:100782276-100782303         | 0.005451198     |             |
| ENST00000223095 | ENSG00000106366<br>(SERPINE1) | hsa-miR-299-5p  | 0.706059227 |

|                 |                               |                 |             |
|-----------------|-------------------------------|-----------------|-------------|
| UTR3            | 7:100780846-100780865         |                 | 0.0220396   |
| UTR3            | 7:100780971-100780983         |                 | 0.002988721 |
| ENST00000223095 | ENSG00000106366<br>(SERPINE1) | hsa-miR-6817-3p | 0.702402554 |
| UTR3            | 7:100780926-100780947         |                 | 0.003701855 |
| UTR3            | 7:100781521-100781545         |                 | 0.014176444 |
| UTR3            | 7:100781985-100782006         |                 | 0.002113285 |
| UTR3            | 7:100781995-100782008         |                 | 0.004749805 |
| ENST00000223095 | ENSG00000106366<br>(SERPINE1) | hsa-miR-19b-3p  | 0.702177595 |
| UTR3            | 7:100782258-100782274         |                 | 0.013807608 |
| UTR3            | 7:100782367-100782384         |                 | 0.010916196 |
| ENST00000223095 | ENSG00000106366<br>(SERPINE1) | hsa-miR-4422    | 0.702097274 |

|                 |                               |                |             |
|-----------------|-------------------------------|----------------|-------------|
| UTR3            | 7:100782446-100782465         | 0.024717527    |             |
| ENST00000223095 | ENSG00000106366<br>(SERPINE1) | hsa-miR-19a-3p | 0.701418361 |
| UTR3            | 7:100782260-100782274         | 0.013748314    |             |
| UTR3            | 7:100782367-100782384         | 0.010916196    |             |
| ENST00000223095 | ENSG00000106366<br>(SERPINE1) | hsa-miR-7974   | 0.700877749 |
| UTR3            | 7:100781909-100781925         | 0.023006242    |             |
| UTR3            | 7:100782126-100782148         | 0.0016161      |             |

**Supplementary Table 3:** targets with miRNAs found in genes ENSG0000010636 (SERPINE1)



| Transcript Id   | Gene Id(name)            | Mirna Name      | miTG score |
|-----------------|--------------------------|-----------------|------------|
| ENST00000599847 | ENSG00000152439 (ZNF773) | hsa-miR-146a-5p | 0.999996   |
| UTR3            | 19:58024644-58024660     | 0.162166849     |            |
| UTR3            | 19:58026567-58026594     | 0.00549672      |            |
| UTR3            | 19:58026679-58026693     | 0.002766695     |            |
| UTR3            | 19:58028097-58028113     | 0.004807814     |            |
| UTR3            | 19:58029501-58029522     | 0.037791942     |            |
| ENST00000526995 | ENSG00000175104 (TRAF6)  | hsa-miR-146a-5p | 0.999978   |
| UTR3            | 11:36511323-36511346     | 0.022150809     |            |
| UTR3            | 11:36510908-36510929     | 0.069665204     |            |
| UTR3            | 11:36510843-36510867     | 0.081734012     |            |
| UTR3            | 11:36510109-36510127     | 0.012250438     |            |
| ENST00000369980 | ENSG00000184216 (IRAK1)  | hsa-miR-146a-5p | 0.999972   |
| UTR3            | X:153277263-153277288    | 0.10883198      |            |
| UTR3            | X:153277247-153277266    | 0.072978108     |            |
| ENST00000370900 | ENSG00000147255 (IGSF1)  | hsa-miR-146a-5p | 0.999866   |
| UTR3            | X:130418887-130418912    | 0.01756038      |            |
| UTR3            | X:130418158-130418179    | 0.138879909     |            |
| ENST00000551765 | ENSG00000257218 (GATC)   | hsa-miR-146a-5p | 0.999528   |
| UTR3            | 12:120899289-120899315   | 0.135881871     |            |
| ENST00000303296 | ENSG00000110422 (HIPK3)  | hsa-miR-146a-5p | 0.999371   |
| UTR3            | 11:33378413-33378426     | 0.131167285     |            |
| ENST00000361264 | ENSG00000198876 (DCAF12) | hsa-miR-146a-5p | 0.99899    |
| UTR3            | 9:34086854-34086875      | 0.002749271     |            |
| UTR3            | 9:34086698-34086719      | 0.005392711     |            |
| UTR3            | 9:34086570-34086593      | 0.115283263     |            |
| ENST00000540664 | ENSG00000196233 (LCOR)   | hsa-miR-146a-5p | 0.998541   |
| UTR3            | 10:98718333-98718354     | 0.007648157     |            |
| UTR3            | 10:98719279-98719304     | 0.003221005     |            |
| UTR3            | 10:98719941-98719961     | 0.001179491     |            |
| UTR3            | 10:98720586-98720604     | 0.001349985     |            |
| UTR3            | 10:98721368-98721378     | 0.00256124      |            |
| UTR3            | 10:98722676-98722703     | 0.002038013     |            |
| UTR3            | 10:98723405-98723420     | 0.012527313     |            |
| UTR3            | 10:98724122-98724137     | 0.08688245      |            |
| ENST00000311015 | ENSG00000172687 (ZNF738) | hsa-miR-146a-5p | 0.998472   |
| UTR3            | 19:21560902-21560921     | 0.007837571     |            |
| UTR3            | 19:21560918-21560936     | 0.019164832     |            |
| UTR3            | 19:21561492-21561511     | 0.053871422     |            |
| UTR3            | 19:21561920-21561947     | 0.03577717      |            |
| ENST00000325144 | ENSG00000181472 (ZBTB2)  | hsa-miR-146a-5p | 0.99803    |
| UTR3            | 6:151686574-151686598    | 0.020209292     |            |
| UTR3            | 6:151686543-151686562    | 0.004069393     |            |
| UTR3            | 6:151686289-151686310    | 0.004942405     |            |
| UTR3            | 6:151685305-151685326    | 0.083272067     |            |

|                 |                                        |                 |          |
|-----------------|----------------------------------------|-----------------|----------|
| ENST00000309446 | ENSG00000118263 (KLF7)                 | hsa-miR-146a-5p | 0.997917 |
| UTR3            | 2:207945824-207945852                  | 0.08048381      |          |
| UTR3            | 2:207945519-207945547                  | 0.005714625     |          |
| UTR3            | 2:207944876-207944900                  | 0.005998419     |          |
| UTR3            | 2:207943584-207943595                  | 0.00584079      |          |
| UTR3            | 2:207943302-207943323                  | 0.002827208     |          |
| UTR3            | 2:207942677-207942689                  | 0.001928592     |          |
| UTR3            | 2:207940603-207940622                  | 0.005706465     |          |
| UTR3            | 2:207939171-207939190                  | 0.003074982     |          |
| ENST00000295025 | ENSG00000162924 (REL)                  | hsa-miR-146a-5p | 0.996836 |
| UTR3            | 2:61151027-61151044                    | 0.001637971     |          |
| UTR3            | 2:61151217-61151234                    | 0.001537235     |          |
| UTR3            | 2:61151958-61151985                    | 0.001533778     |          |
| UTR3            | 2:61152432-61152455                    | 0.001577663     |          |
| UTR3            | 2:61153748-61153767                    | 0.003562602     |          |
| UTR3            | 2:61154027-61154049                    | 0.002116903     |          |
| UTR3            | 2:61155043-61155068                    | 0.001251838     |          |
| UTR3            | 2:61156712-61156733                    | 0.001070489     |          |
| UTR3            | 2:61157488-61157507                    | 0.001576509     |          |
| UTR3            | 2:61158582-61158589                    | 0.088861545     |          |
| ENST00000589717 | ENSG00000256771 (ZNF253)               | hsa-miR-146a-5p | 0.996391 |
| UTR3            | 19:20003682-20003702                   | 0.043465348     |          |
| UTR3            | 19:20003771-20003789                   | 0.042273763     |          |
| UTR3            | 19:20005318-20005333                   | 0.023045069     |          |
| UTR3            | 19:19990947;20002283-19990955;20002295 | 0.025854842     |          |
| ENST00000375256 | ENSG00000165244 (ZNF367)               | hsa-miR-146a-5p | 0.994372 |
| UTR3            | 9:99150215-99150235                    | 0.090060273     |          |
| UTR3            | 9:99149779-99149804                    | 0.005216236     |          |
| ENST00000592773 | ENSG00000198597 (ZNF536)               | hsa-miR-146a-5p | 0.993696 |
| UTR3            | 19:31202624-31202649                   | 0.002316742     |          |
| UTR3            | 19:31203616-31203639                   | 0.067381133     |          |
| UTR3            | 19:31204165-31204181                   | 0.023711034     |          |
| ENST00000368599 | ENSG00000178033 (FAM26E)               | hsa-miR-146a-5p | 0.993304 |
| UTR3            | 6:116837627-116837655                  | 0.059125776     |          |
| UTR3            | 6:116838112-116838124                  | 0.001946717     |          |
| UTR3            | 6:116838207-116838222                  | 0.00121829      |          |
| UTR3            | 6:116838310-116838326                  | 0.001223976     |          |
| UTR3            | 6:116839704-116839722                  | 0.003290396     |          |
| UTR3            | 6:116840077-116840097                  | 0.005254453     |          |
| UTR3            | 6:116841391-116841419                  | 0.001576348     |          |
| UTR3            | 6:116842165-116842191                  | 0.001106404     |          |
| UTR3            | 6:116844081-116844102                  | 0.006878417     |          |
| UTR3            | 6:116844207-116844231                  | 0.002300399     |          |
| UTR3            | 6:116845617-116845636                  | 0.002722865     |          |
| UTR3            | 6:116845794-116845805                  | 0.005774964     |          |

|                 |                                        |                 |          |
|-----------------|----------------------------------------|-----------------|----------|
| ENST00000485895 | ENSG00000157578 (LCA5L)                | hsa-miR-146a-5p | 0.992713 |
| UTR3            | 21:40793523-40793543                   | 0.032139976     |          |
| UTR3            | 21:40793506-40793524                   | 0.065419046     |          |
| UTR3            | 21:40800229-40800250                   | 0.036268404     |          |
| ENST00000576251 | ENSG00000101574 (METTL4)               | hsa-miR-146a-5p | 0.990927 |
| UTR3            | 18:2539046-2539071                     | 0.07588562      |          |
| UTR3            | 18:2537938-2537954                     | 0.004395617     |          |
| UTR3            | 18:2537532-2537551                     | 0.007132501     |          |
| ENST00000286614 | ENSG00000156103 (MMP16)                | hsa-miR-146a-5p | 0.989699 |
| UTR3            | 8:89052958-89052986                    | 0.016858117     |          |
| UTR3            | 8:89052202-89052229                    | 0.057045567     |          |
| UTR3            | 8:89051674-89051694                    | 0.002189713     |          |
| UTR3            | 8:89045113-89045141                    | 0.009225133     |          |
| ENST00000382852 | ENSG00000169953 (HSFY2)                | hsa-miR-146a-5p | 0.988862 |
| UTR3            | Y:20931130-20931157                    | 0.084027364     |          |
| ENST00000290271 | ENSG00000159167 (STC1)                 | hsa-miR-146a-5p | 0.988056 |
| UTR3            | 8:23699890-23699915                    | 0.082872295     |          |
| ENST00000334681 | ENSG00000187094 (CCK)                  | hsa-miR-146a-5p | 0.987618 |
| UTR3            | 3:42299458-42299477                    | 0.082276863     |          |
| ENST00000433818 | ENSG00000149262 (INTS4)                | hsa-miR-146a-5p | 0.986014 |
| UTR3            | 11:77652272-77652294                   | 0.066292961     |          |
| UTR3            | 11:77632452-77632469                   | 0.010846087     |          |
| UTR3            | 11:77632405-77632426                   | 0.001715156     |          |
| UTR3            | 11:77618768-77618795                   | 0.001404855     |          |
| ENST00000338965 | ENSG00000188211 (NCR3LG1)              | hsa-miR-146a-5p | 0.984424 |
| UTR3            | 11:17394132-17394148                   | 0.038371797     |          |
| UTR3            | 11:17395248-17395265                   | 0.006769936     |          |
| UTR3            | 11:17397082-17397108                   | 0.011408701     |          |
| UTR3            | 11:17397559-17397576                   | 0.021922331     |          |
| ENST00000369649 | ENSG00000126903 (SLC10A3)              | hsa-miR-146a-5p | 0.984234 |
| UTR3            | X:153715790-153715816                  | 0.078824117     |          |
| UTR3            | X:153716237-153716258                  | 0.006924871     |          |
| ENST00000264246 | ENSG00000121594 (CD80)                 | hsa-miR-146a-5p | 0.983963 |
| UTR3            | 3:119244014-119244036                  | 0.00456856      |          |
| UTR3            | 3:119243789-119243807                  | 0.068361995     |          |
| UTR3            | 3:119243349-119243370                  | 0.005057847     |          |
| ENST00000555818 | ENSG00000197555 (SIPA1L1)              | hsa-miR-146a-5p | 0.983428 |
| UTR3            | 14:72206516-72206541                   | 0.001932333     |          |
| UTR3            | 14:72207605-72207626                   | 0.073432655     |          |
| UTR3            | 14:72207870-72207896                   | 0.003735818     |          |
| UTR3            | 14:72054753-72054777                   | 0.014745367     |          |
| UTR3            | 14:72197011;72200383-72197018;72200393 | 0.005666713     |          |

|                 |                           |                 |          |
|-----------------|---------------------------|-----------------|----------|
| ENST00000446113 | ENSG00000177054 (ZDHHC13) | hsa-miR-146a-5p | 0.982959 |
| UTR3            | 11:19197628-19197653      | 0.076979167     |          |
| ENST00000313899 | ENSG00000138668 (HNRNPD)  | hsa-miR-146a-5p | 0.98259  |
| UTR3            | 4:83275160-83275187       | 0.076623141     |          |
| ENST00000371388 | ENSG00000131721 (RHOXF2)  | hsa-miR-146a-5p | 0.98248  |
| UTR3            | X:119297888-119297911     | 0.076518911     |          |
|                 | ENSG00000166881           |                 |          |
| ENST00000379391 | (TMEM194A)                | hsa-miR-146a-5p | 0.98155  |
| UTR3            | 12:57452981-57452999      | 0.068012716     |          |
| UTR3            | 12:57452706-57452727      | 0.003267033     |          |
| UTR3            | 12:57452588-57452611      | 0.001285431     |          |
| UTR3            | 12:57452281-57452308      | 0.001279032     |          |
| UTR3            | 12:57451801-57451817      | 0.001813596     |          |
| ENST00000591639 | ENSG00000081665 (ZNF506)  | hsa-miR-146a-5p | 0.980274 |
| UTR3            | 19:19905215-19905235      | 0.034181582     |          |
| UTR3            | 19:19904826-19904844      | 0.040361526     |          |
| ENST00000605860 | ENSG00000007001 (UPP2)    | hsa-miR-146a-5p | 0.980101 |
| UTR3            | 2:158991475-158991501     | 0.070411781     |          |
| UTR3            | 2:158992322-158992344     | 0.003986281     |          |
| ENST00000299167 | ENSG00000102893 (PHKB)    | hsa-miR-146a-5p | 0.977294 |
| UTR3            | 16:47733466-47733488      | 0.053193894     |          |
| UTR3            | 16:47733755-47733778      | 0.019637868     |          |
| UTR3            | 16:47684491-47684518      | 0.013391224     |          |
| ENST00000608872 | ENSG00000119402 (FBXW2)   | hsa-miR-146a-5p | 0.976567 |
| UTR3            | 9:123526740-123526762     | 0.068016148     |          |
| UTR3            | 9:123523696-123523717     | 0.001775084     |          |
| UTR3            | 9:123520365-123520378     | 0.00187573      |          |
| ENST00000490715 | ENSG00000007341 (ST7L)    | hsa-miR-146a-5p | 0.975657 |
| UTR3            | 1:113067415-113067439     | 0.0042105       |          |
| UTR3            | 1:113067037-113067062     | 0.004095764     |          |
| UTR3            | 1:113066159-113066187     | 0.062722518     |          |
| ENST00000342788 | ENSG00000178568 (ERBB4)   | hsa-miR-146a-5p | 0.975636 |
| UTR3            | 2:212247377-212247394     | 0.004531221     |          |
| UTR3            | 2:212246814-212246836     | 0.002219412     |          |
| UTR3            | 2:212244136-212244156     | 0.002083036     |          |
| UTR3            | 2:212243884-212243902     | 0.001060149     |          |
| UTR3            | 2:212243301-212243319     | 0.002388579     |          |
| UTR3            | 2:212241602-212241626     | 0.00192031      |          |
| UTR3            | 2:212240641-212240654     | 0.057144256     |          |
| UTR3            | 2:212248401-212248426     | 0.008386047     |          |
| ENST00000420940 | ENSG00000114742 (WDR48)   | hsa-miR-146a-5p | 0.974994 |
| UTR3            | 3:39116412-39116439       | 0.049608154     |          |
| UTR3            | 3:39125718-39125735       | 0.020970741     |          |
| ENST00000526148 | ENSG00000110321 (EIF4G2)  | hsa-miR-146a-5p | 0.974218 |

|                 |                          |                 |             |
|-----------------|--------------------------|-----------------|-------------|
| UTR3            | 11:10819100-10819127     |                 | 0.070066405 |
| ENST00000325881 | ENSG00000157734 (SNX22)  | hsa-miR-146a-5p | 0.974077    |
| UTR3            | 15:64448598-64448619     |                 | 0.001360365 |
| UTR3            | 15:64449050-64449077     |                 | 0.068614747 |
| ENST00000423270 | ENSG00000181827 (RFX7)   | hsa-miR-146a-5p | 0.974012    |
| UTR3            | 15:56382807-56382819     |                 | 0.07030419  |
| UTR3            | 15:56388518-56388540     |                 | 0.010916094 |
| ENST00000369962 | ENSG00000085433 (WDR47)  | hsa-miR-146a-5p | 0.972803    |
| UTR3            | 1:109513595-109513623    |                 | 0.004430319 |
| UTR3            | 1:109512956-109512979    |                 | 0.064738903 |
| ENST00000335877 | ENSG00000125818 (PSMF1)  | hsa-miR-146a-5p | 0.972281    |
| UTR3            | 20:1146213-1146237       |                 | 0.003487842 |
| UTR3            | 20:1146841-1146856       |                 | 0.003957562 |
| UTR3            | 20:1148219-1148234       |                 | 0.032232406 |
| UTR3            | 20:1148898-1148915       |                 | 0.029172153 |
| ENST00000354957 | ENSG00000198093 (ZNF649) | hsa-miR-146a-5p | 0.971925    |
| UTR3            | 19:52393575-52393601     |                 | 0.007636897 |
| UTR3            | 19:52393442-52393461     |                 | 0.055621714 |
| UTR3            | 19:52393078-52393097     |                 | 0.005376865 |
| ENST00000274747 | ENSG00000124532 (MRS2)   | hsa-miR-146a-5p | 0.971303    |
| UTR3            | 6:24424318-24424341      |                 | 0.001332653 |
| UTR3            | 6:24424506-24424529      |                 | 0.002817953 |
| UTR3            | 6:24424771-24424795      |                 | 0.002510468 |
| UTR3            | 6:24425759-24425786      |                 | 0.061605742 |
| ENST00000502732 | ENSG00000143322 (ABL2)   | hsa-miR-146a-5p | 0.971234    |
| UTR3            | 1:179076710-179076731    |                 | 0.048888516 |
| UTR3            | 1:179075949-179075963    |                 | 0.007319827 |
| UTR3            | 1:179075661-179075678    |                 | 0.001967829 |
| UTR3            | 1:179075104-179075127    |                 | 0.00470782  |
| UTR3            | 1:179069360-179069382    |                 | 0.00166731  |
| UTR3            | 1:179068523-179068546    |                 | 0.003675112 |
| ENST00000458646 | ENSG00000077092 (RARB)   | hsa-miR-146a-5p | 0.971037    |
| UTR3            | 3:25639229-25639249      |                 | 0.068111561 |
| ENST00000318588 | ENSG00000147044 (CASK)   | hsa-miR-146a-5p | 0.970985    |
| UTR3            | X:41379460-41379479      |                 | 0.058467887 |
| UTR3            | X:41378099-41378118      |                 | 0.003460778 |
| UTR3            | X:41377184-41377200      |                 | 0.002033892 |
| UTR3            | X:41376837-41376857      |                 | 0.001339655 |
| UTR3            | X:41375890-41375916      |                 | 0.001271731 |
| UTR3            | X:41375737-41375751      |                 | 0.001507484 |
| ENST00000426654 | ENSG00000102908 (NFAT5)  | hsa-miR-146a-5p | 0.970846    |
| UTR3            | 16:69681433-69681447     |                 | 0.005047255 |
| UTR3            | 16:69726570-69726592     |                 | 0.00198929  |
| UTR3            | 16:69726951-69726979     |                 | 0.002064471 |
| UTR3            | 16:69727036-69727056     |                 | 0.001146055 |
| UTR3            | 16:69727866-69727885     |                 | 0.018591107 |
| UTR3            | 16:69729133-69729156     |                 | 0.002342665 |

|                 |                          |                 |             |
|-----------------|--------------------------|-----------------|-------------|
| UTR3            | 16:69730904-69730924     |                 | 0.003376283 |
| UTR3            | 16:69731625-69731647     |                 | 0.001326825 |
| UTR3            | 16:69731973-69732000     |                 | 0.002436764 |
| UTR3            | 16:69733289-69733307     |                 | 0.002000631 |
| UTR3            | 16:69736424-69736438     |                 | 0.0050489   |
| UTR3            | 16:69736425-69736452     |                 | 0.001216539 |
| UTR3            | 16:69736719-69736746     |                 | 0.002038788 |
| UTR3            | 16:69738193-69738219     |                 | 0.012206378 |
| UTR3            | 16:69738383-69738405     |                 | 0.007169048 |
| ENST00000531960 | ENSG00000175664 (TEX26)  | hsa-miR-146a-5p | 0.969694    |
|                 | 13:31531165;31540359-    |                 |             |
| UTR3            | 31531166;31540383        |                 | 0.052837536 |
| UTR3            | 13:31540503-31540527     |                 | 0.006178791 |
| UTR3            | 13:31549093-31549118     |                 | 0.008331502 |
| ENST00000451804 | ENSG00000123843 (C4BPB)  | hsa-miR-146a-5p | 0.968445    |
| UTR3            | 1:207269090-207269109    |                 | 0.007509318 |
| UTR3            | 1:207269144-207269167    |                 | 0.059348067 |
| UTR3            | 1:207268766-207268786    |                 | 0.012248576 |
| ENST00000312960 | ENSG00000181788 (SIAH2)  | hsa-miR-146a-5p | 0.967726    |
| UTR3            | 3:150459129-150459146    |                 | 0.066286302 |
| ENST00000522677 | ENSG00000185697 (MYBL1)  | hsa-miR-146a-5p | 0.967611    |
| UTR3            | 8:67476854-67476878      |                 | 0.005352398 |
| UTR3            | 8:67476647-67476674      |                 | 0.005901183 |
| UTR3            | 8:67475390-67475411      |                 | 0.049925049 |
| UTR3            | 8:67475021-67475040      |                 | 0.005047602 |
| ENST00000303697 | ENSG00000170959 (DCDC1)  | hsa-miR-146a-5p | 0.967499    |
| UTR3            | 11:30904673-30904687     |                 | 0.00691475  |
| UTR3            | 11:30904662-30904687     |                 | 0.004648429 |
| UTR3            | 11:30904216-30904239     |                 | 0.009681834 |
| UTR3            | 11:30886688-30886708     |                 | 0.001045666 |
| UTR3            | 11:30885758-30885774     |                 | 0.02908735  |
| UTR3            | 11:30885305-30885318     |                 | 0.005801897 |
| UTR3            | 11:30885258-30885285     |                 | 0.008987909 |
| ENST00000394767 | ENSG00000168772 (CXXC4)  | hsa-miR-146a-5p | 0.967096    |
| UTR3            | 4:105392273-105392294    |                 | 0.002979569 |
| UTR3            | 4:105390842-105390867    |                 | 0.024136922 |
| UTR3            | 4:105389892-105389909    |                 | 0.026498739 |
| UTR3            | 4:105389713-105389732    |                 | 0.012344391 |
| ENST00000397358 | ENSG00000147421 (HMBOX1) | hsa-miR-146a-5p | 0.966784    |
| UTR3            | 8:28908976-28908990      |                 | 0.060699779 |
| UTR3            | 8:28909825-28909851      |                 | 0.001942684 |
| UTR3            | 8:28910510-28910535      |                 | 0.003158026 |
| ENST00000372491 | ENSG00000188483 (IER5L)  | hsa-miR-146a-5p | 0.966423    |
| UTR3            | 9:131938528-131938554    |                 | 0.059644552 |
| UTR3            | 9:131938425-131938444    |                 | 0.001707461 |
| UTR3            | 9:131937995-131938010    |                 | 0.004265577 |

|                 |                                        |                 |          |
|-----------------|----------------------------------------|-----------------|----------|
| ENST00000331070 | ENSG00000183753 (BPY2)                 | hsa-miR-146a-5p | 0.964886 |
| UTR3            | Y:25151353-25151381                    | 0.014207961     |          |
| UTR3            | Y:25151392-25151420                    | 0.050651878     |          |
| ENST00000326972 | ENSG00000180438 (TPRXL)                | hsa-miR-146a-5p | 0.964825 |
| UTR3            | 3:14107339-14107362                    | 0.064830578     |          |
| ENST00000316398 | ENSG00000179071 (CCDC89)               | hsa-miR-146a-5p | 0.964203 |
| UTR3            | 11:85395766-85395787                   | 0.005468352     |          |
| UTR3            | 11:85395080-85395106                   | 0.052315425     |          |
| UTR3            | 11:85394980-85394996                   | 0.006749639     |          |
| ENST00000388975 | ENSG00000154997 (SEPT14)               | hsa-miR-146a-5p | 0.963043 |
| UTR3            | 7:55863516-55863531                    | 0.05159133      |          |
| UTR3            | 7:55862002-55862024                    | 0.003538476     |          |
| UTR3            | 7:55861575-55861589                    | 0.004177488     |          |
| UTR3            | 7:55861511-55861533                    | 0.004685542     |          |
| ENST00000369075 | ENSG00000107651 (SEC23IP)              | hsa-miR-146a-5p | 0.962913 |
| UTR3            | 10:121701122-121701141                 | 0.063930929     |          |
| UTR3            | 10:121689879-121689907                 | 0.017987386     |          |
| ENST00000540052 | ENSG00000085185 (BCORL1)               | hsa-miR-146a-5p | 0.962412 |
| UTR3            | X:129190279-129190297                  | 0.055280716     |          |
| UTR3            | X:129191651-129191668                  | 0.006202261     |          |
| UTR3            | X:129191734-129191753                  | 0.002222371     |          |
| ENST00000509876 | ENSG00000118482 (PHF3)                 | hsa-miR-146a-5p | 0.960985 |
| UTR3            | 6:64388863-64388883                    | 0.039464627     |          |
| UTR3            | 6:64401675-64401695                    | 0.001936082     |          |
| UTR3            | 6:64416077-64416102                    | 0.000959486     |          |
| UTR3            | 6:64422306-64422327                    | 0.006576867     |          |
| UTR3            | 6:64422654-64422679                    | 0.001684375     |          |
| UTR3            | 6:64424327-64424346                    | 0.012450422     |          |
| ENST00000505939 | ENSG00000131127 (ZNF141)               | hsa-miR-146a-5p | 0.959868 |
| UTR3            | 4:377476-377500                        | 0.055187942     |          |
| UTR3            | 4:377715-377735                        | 0.007403891     |          |
| ENST00000534668 | ENSG00000156738 (MS4A1)                | hsa-miR-146a-5p | 0.958265 |
| UTR3            | 11:60237468-60237484                   | 0.049682071     |          |
| UTR3            | 11:60237677-60237702                   | 0.012025072     |          |
| UTR3            | 11:60234523;60235723-60234533;60235734 | 0.018023781     |          |
| ENST00000352690 | ENSG00000153283 (CD96)                 | hsa-miR-146a-5p | 0.957927 |
| UTR3            | 3:111370018-111370039                  | 0.001672588     |          |
| UTR3            | 3:111371104-111371119                  | 0.060028197     |          |
| UTR3            | 3:111297993-111298019                  | 0.007114806     |          |
| ENST00000421627 | ENSG00000198010 (DLGAP2)               | hsa-miR-146a-5p | 0.957255 |
| UTR3            | 8:1649837-1649862                      | 0.013787664     |          |
| UTR3            | 8:1650195-1650211                      | 0.008738723     |          |

|                 |                                            |                 |             |
|-----------------|--------------------------------------------|-----------------|-------------|
| UTR3            | 8:1650468-1650493                          |                 | 0.002831756 |
| UTR3            | 8:1650961-1650988                          |                 | 0.016207131 |
| UTR3            | 8:1652162-1652188                          |                 | 0.011872031 |
| UTR3            | 8:1652728-1652741                          |                 | 0.002124407 |
| UTR3            | 8:1653852-1653870                          |                 | 0.001489885 |
| UTR3            | 8:1653942-1653968                          |                 | 0.000862255 |
| UTR3            | 8:1656043-1656069                          |                 | 0.003602114 |
| ENST00000382387 | ENSG00000183784 (C9orf66)                  | hsa-miR-146a-5p | 0.95659     |
| UTR3            | 9:214327-214355                            |                 | 0.061252549 |
| ENST00000400477 | ENSG00000198054 (DSCR8)                    | hsa-miR-146a-5p | 0.95643     |
| UTR3            | 21:39528509-39528533                       |                 | 0.061189496 |
| ENST00000371402 | ENSG00000203989 (RHOXF2B)                  | hsa-miR-146a-5p | 0.956011    |
| UTR3            | X:119206263-119206286                      |                 | 0.061025966 |
| ENST00000317775 | ENSG00000089250 (NOS1)                     | hsa-miR-146a-5p | 0.955282    |
| UTR3            | 12:117646967-117646980                     |                 | 0.00312639  |
| UTR3            | 12:117646368-117646385                     |                 | 0.004048539 |
| UTR3            | 12:117646026-117646053                     |                 | 0.053226965 |
| UTR3            | 12:117728132-117728158                     |                 | 0.009613168 |
| UTR3            | 12:117698399;117701694-117698414;117701704 |                 | 0.002600023 |
| UTR3            | 12:117685321;117691443-117685327;117691461 |                 | 0.005807081 |
| ENST00000382392 | ENSG00000183795 (BPY2B)                    | hsa-miR-146a-5p | 0.955036    |
| UTR3            | Y:26785095-26785123                        |                 | 0.015053225 |
| UTR3            | Y:26785134-26785162                        |                 | 0.045597779 |
| ENST00000335117 | ENSG00000256229 (ZNF486)                   | hsa-miR-146a-5p | 0.954494    |
| UTR3            | 19:20309217-20309237                       |                 | 0.028528132 |
| UTR3            | 19:20309297-20309315                       |                 | 0.031606914 |
| UTR3            | 19:20296883;20307773-20296891;20307785     |                 | 0.015189044 |
| ENST00000229201 | ENSG00000111602 (TIMELESS)                 | hsa-miR-146a-5p | 0.954485    |
| UTR3            | 12:56811258-56811280                       |                 | 0.015340971 |
| UTR3            | 12:56810907-56810928                       |                 | 0.045101519 |
| ENST00000382287 | ENSG00000185894 (BPY2C)                    | hsa-miR-146a-5p | 0.953835    |
| UTR3            | Y:27177279-27177307                        |                 | 0.015001567 |
| UTR3            | Y:27177240-27177268                        |                 | 0.045198006 |
| ENST00000409600 | ENSG00000082153 (BZW1)                     | hsa-miR-146a-5p | 0.953493    |
| UTR3            | 2:201687952-201687977                      |                 | 0.004181261 |
| UTR3            | 2:201688497-201688518                      |                 | 0.055891885 |
| ENST00000427390 | ENSG00000215405 (GOLGA6L6)                 | hsa-miR-146a-5p | 0.953376    |
| UTR3            | 15:20738351-20738366                       |                 | 0.010868893 |
| UTR3            | 15:20738100-20738119                       |                 | 0.006816508 |
| UTR3            | 15:20737326-20737340                       |                 | 0.042344835 |



|                 |                                           |                 |          |
|-----------------|-------------------------------------------|-----------------|----------|
| ENST00000418724 | ENSG00000236104 (ZBTB22)                  | hsa-miR-146a-5p | 0.95281  |
| UTR3            | 6:33282289-33282316                       | 0.059823276     |          |
| ENST00000427431 | ENSG00000151718 (WWC2)                    | hsa-miR-146a-5p | 0.95149  |
| UTR3            | 4:184182481-184182497                     | 0.001425662     |          |
| UTR3            | 4:184239294-184239312                     | 0.057615359     |          |
| UTR3            | 4:184129276-184129301                     | 0.011717538     |          |
| ENST00000304801 | ENSG00000170950 (PGK2)                    | hsa-miR-146a-5p | 0.949116 |
| UTR3            | 6:49753444-49753468                       | 0.058527915     |          |
| ENST00000373664 | ENSG00000080839 (RBL1)                    | hsa-miR-146a-5p | 0.947538 |
| UTR3            | 20:35626118-35626134                      | 0.041295883     |          |
| UTR3            | 20:35625851-35625867                      | 0.00821791      |          |
| UTR3            | 20:35625375-35625398                      | 0.003819123     |          |
| UTR3            | 20:35624861-35624889                      | 0.003810607     |          |
| UTR3            | 20:35675482-35675504                      | 0.012623947     |          |
| UTR3            | 20:35663864-35663884                      | 0.010874714     |          |
| ENST00000371079 | ENSG00000185483 (ROR1)                    | hsa-miR-146a-5p | 0.944332 |
| UTR3            | 1:64644620-64644632                       | 0.032064351     |          |
| UTR3            | 1:64645289-64645309                       | 0.007921362     |          |
| UTR3            | 1:64645731-64645756                       | 0.016575153     |          |
| UTR3            | 1:64605822-64605843                       | 0.010494527     |          |
| ENST00000584307 | ENSG00000176105 (YES1)                    | hsa-miR-146a-5p | 0.944138 |
| UTR3            | 18:723949-723963                          | 0.004999566     |          |
| UTR3            | 18:721758-721784                          | 0.046396654     |          |
| UTR3            | 18:721714-721740                          | 0.005520395     |          |
| ENST00000366518 | ENSG00000162849 (KIF26B)                  | hsa-miR-146a-5p | 0.943158 |
| UTR3            | 1:245867013-245867033                     | 0.001396727     |          |
| UTR3            | 1:245868440-245868461                     | 0.003124656     |          |
| UTR3            | 1:245869105-245869124                     | 0.000935753     |          |
| UTR3            | 1:245870404-245870417                     | 0.002302977     |          |
| UTR3            | 1:245870795-245870806                     | 0.001441941     |          |
| UTR3            | 1:245870899-245870913                     | 0.000691472     |          |
| UTR3            | 1:245872529-245872557                     | 0.046210219     |          |
| UTR3            | 1:245852103;245861408-245852109;245861414 | 0.012154847     |          |
| ENST00000424906 | ENSG00000164053 (ATRIP)                   | hsa-miR-146a-5p | 0.943077 |
| UTR3            | 3:48493144-48493162                       | 0.049888184     |          |
| UTR3            | 3:48498687-48498705                       | 0.006702531     |          |
| ENST00000361621 | ENSG00000123560 (PLP1)                    | hsa-miR-146a-5p | 0.942031 |
| UTR3            | X:103045833-103045861                     | 0.008635428     |          |
| UTR3            | X:103046249-103046276                     | 0.003698811     |          |
| UTR3            | X:103047532-103047542                     | 0.043940552     |          |
| ENST00000379982 | ENSG00000164292 (RHOBTB3)                 | hsa-miR-146a-5p | 0.941498 |
| UTR3            | 5:95128996-95129019                       | 0.016897218     |          |
| UTR3            | 5:95129373-95129389                       | 0.033267653     |          |
| UTR3            | 5:95131310-95131323                       | 0.005951106     |          |
| ENST00000519163 | ENSG00000104218 (CSPP1)                   | hsa-miR-146a-5p | 0.941364 |

|                 |                           |                 |             |
|-----------------|---------------------------|-----------------|-------------|
| UTR3            | 8:68026223-68026240       |                 | 0.044563842 |
| UTR3            | 8:68026323-68026331       |                 | 0.007979779 |
| UTR3            | 8:68028274-68028300       |                 | 0.003532602 |
| ENST00000263773 | ENSG00000109920 (FNBP4)   | hsa-miR-146a-5p | 0.940914    |
| UTR3            | 11:47738744-47738763      |                 | 0.006688765 |
| UTR3            | 11:47738457-47738476      |                 | 0.048080432 |
| UTR3            | 11:47745613-47745627      |                 | 0.014972637 |
| UTR3            | 11:47745605-47745627      |                 | 0.008874075 |
| ENST00000354371 | ENSG00000198612 (COPS8)   | hsa-miR-146a-5p | 0.939224    |
| UTR3            | 2:238006581-238006589     |                 | 0.041859037 |
| UTR3            | 2:238008654-238008673     |                 | 0.013594174 |
| ENST00000395375 | ENSG00000198039 (ZNF273)  | hsa-miR-146a-5p | 0.939075    |
|                 | 7:64378662;64388032-      |                 |             |
| UTR3            | 64378670;64388044         |                 | 0.014125925 |
| UTR3            | 7:64388261-64388279       |                 | 0.005364395 |
| UTR3            | 7:64388429-64388447       |                 | 0.030797464 |
| UTR3            | 7:64388674-64388699       |                 | 0.003209394 |
| UTR3            | 7:64389010-64389035       |                 | 0.001913377 |
| ENST00000374507 | ENSG00000204193 (TXNDC8)  | hsa-miR-146a-5p | 0.936609    |
| UTR3            | 9:113085880-113085891     |                 | 0.008513856 |
| UTR3            | 9:113085408-113085427     |                 | 0.004058142 |
| UTR3            | 9:113085220-113085246     |                 | 0.004977702 |
| UTR3            | 9:113084886-113084900     |                 | 0.037169489 |
| ENST00000554546 | ENSG00000133961 (NUMB)    | hsa-miR-146a-5p | 0.935898    |
| UTR3            | 14:73742656-73742664      |                 | 0.053802238 |
| UTR3            | 14:73743841-73743858      |                 | 0.013267449 |
| ENST00000340749 | ENSG00000173262 (SLC2A14) | hsa-miR-146a-5p | 0.935551    |
| UTR3            | 12:7966791-7966807        |                 | 0.003726273 |
| UTR3            | 12:7966171-7966199        |                 | 0.005629484 |
| UTR3            | 12:7965353-7965377        |                 | 0.014027086 |
| UTR3            | 12:7965346-7965371        |                 | 0.024269016 |
| UTR3            | 12:7965199-7965224        |                 | 0.006778283 |
| ENST00000374864 | ENSG00000078747 (ITCH)    | hsa-miR-146a-5p | 0.934822    |
| UTR3            | 20:33095721-33095734      |                 | 0.017221974 |
| UTR3            | 20:33096061-33096079      |                 | 0.002212767 |
| UTR3            | 20:33096918-33096938      |                 | 0.001713671 |
| UTR3            | 20:33096979-33096996      |                 | 0.001650712 |
| UTR3            | 20:33097624-33097643      |                 | 0.001772097 |
| UTR3            | 20:33098706-33098730      |                 | 0.029662258 |
| ENST00000396847 | ENSG00000132256 (TRIM5)   | hsa-miR-146a-5p | 0.934152    |
| UTR3            | 11:5686140-5686153        |                 | 0.003644808 |
| UTR3            | 11:5686124-5686152        |                 | 0.002112568 |
| UTR3            | 11:5686109-5686127        |                 | 0.001897926 |
| UTR3            | 11:5685000-5685017        |                 | 0.046399409 |

|                 |                                           |                 |          |
|-----------------|-------------------------------------------|-----------------|----------|
| ENST00000460236 | ENSG00000129292 (PHF20L1)                 | hsa-miR-146a-5p | 0.932921 |
| UTR3            | 8:133844538-133844560                     | 0.009228918     |          |
| UTR3            | 8:133851700-133851725                     | 0.00469759      |          |
| UTR3            | 8:133858432-133858452                     | 0.010108046     |          |
| UTR3            | 8:133858614-133858634                     | 0.00158917      |          |
| UTR3            | 8:133858696-133858718                     | 0.00444692      |          |
| UTR3            | 8:133858921-133858932                     | 0.003045201     |          |
| UTR3            | 8:133859639-133859663                     | 0.02061466      |          |
|                 | ENSG00000168564                           |                 |          |
| ENST00000302350 | (CDKN2AIP)                                | hsa-miR-146a-5p | 0.931422 |
| UTR3            | 4:184368018-184368045                     | 0.035372107     |          |
| UTR3            | 4:184368429-184368446                     | 0.005628986     |          |
| UTR3            | 4:184368700-184368718                     | 0.012341869     |          |
| ENST00000316529 | ENSG00000180919 (OR56B4)                  | hsa-miR-146a-5p | 0.93079  |
| UTR3            | 11:6130007-6130024                        | 0.053181943     |          |
| ENST00000366113 | ENSG00000161570 (CCL5)                    | hsa-miR-146a-5p | 0.930675 |
| UTR3            | 17:34198508-34198522                      | 0.053152711     |          |
| ENST00000450366 | ENSG00000115365 (LANCL1)                  | hsa-miR-146a-5p | 0.930108 |
| UTR3            | 2:211297293-211297318                     | 0.009482455     |          |
| UTR3            | 2:211295997-211296012                     | 0.042959185     |          |
| UTR3            | 2:211336783;211341040-211336800;211341047 | 0.009201432     |          |
| ENST00000366918 | ENSG00000116141 (MARK1)                   | hsa-miR-146a-5p | 0.929721 |
| UTR3            | 1:220837230-220837245                     | 0.048516216     |          |
| UTR3            | 1:220837502-220837527                     | 0.004396329     |          |
| ENST00000366997 | ENSG00000123684 (LPGAT1)                  | hsa-miR-146a-5p | 0.928543 |
| UTR3            | 1:211922841-211922862                     | 0.010840692     |          |
| UTR3            | 1:211922561-211922589                     | 0.003129534     |          |
| UTR3            | 1:211922433-211922452                     | 0.002264568     |          |
| UTR3            | 1:211922178-211922202                     | 0.00623912      |          |
| UTR3            | 1:211920909-211920935                     | 0.010475883     |          |
| UTR3            | 1:211920631-211920657                     | 0.002319689     |          |
| UTR3            | 1:211920563-211920580                     | 0.001169805     |          |
| UTR3            | 1:211919651-211919672                     | 0.006850212     |          |
| UTR3            | 1:211918391-211918414                     | 0.002940592     |          |
| UTR3            | 1:211917953-211917975                     | 0.001648773     |          |
| UTR3            | 1:211917530-211917556                     | 0.004741397     |          |
| ENST00000544604 | ENSG00000183579 (ZNRFB3)                  | hsa-miR-146a-5p | 0.928019 |
| UTR3            | 22:29449881-29449904                      | 0.010205315     |          |
| UTR3            | 22:29451365-29451388                      | 0.001173897     |          |
| UTR3            | 22:29451526-29451544                      | 0.000662302     |          |
| UTR3            | 22:29452413-29452431                      | 0.001380347     |          |
| UTR3            | 22:29453216-29453236                      | 0.039069593     |          |
| ENST00000260113 | ENSG00000137558 (PI15)                    | hsa-miR-146a-5p | 0.925588 |
| UTR3            | 8:75761935-75761959                       | 0.003424527     |          |

|                 |                           |                 |             |
|-----------------|---------------------------|-----------------|-------------|
| UTR3            | 8:75762125-75762147       |                 | 0.042990623 |
| UTR3            | 8:75762409-75762428       |                 | 0.002062434 |
| UTR3            | 8:75764483-75764508       |                 | 0.001569849 |
| UTR3            | 8:75764893-75764912       |                 | 0.001858343 |
| ENST00000370251 | ENSG00000063587 (ZNF275)  | hsa-miR-146a-5p | 0.925555    |
| UTR3            | X:152614970-152614987     |                 | 0.002206311 |
| UTR3            | X:152616122-152616140     |                 | 0.000940463 |
| UTR3            | X:152616680-152616692     |                 | 0.001484893 |
| UTR3            | X:152617754-152617778     |                 | 0.002756319 |
| UTR3            | X:152617768-152617785     |                 | 0.002120668 |
| UTR3            | X:152617911-152617921     |                 | 0.003238824 |
| UTR3            | X:152617989-152618017     |                 | 0.034558842 |
| UTR3            | X:152618134-152618160     |                 | 0.004591758 |
| ENST00000554234 | ENSG00000166866 (MYO1A)   | hsa-miR-146a-5p | 0.924313    |
| UTR3            | 12:57423326-57423342      |                 | 0.005336016 |
|                 | 12:57422659;57422916-     |                 |             |
| UTR3            | 57422665;57422928         |                 | 0.045615654 |
| UTR3            | 12:57431812-57431836      |                 | 0.009380617 |
| ENST00000369535 | ENSG00000213281 (NRAS)    | hsa-miR-146a-5p | 0.923161    |
| UTR3            | 1:115250536-115250554     |                 | 0.046811517 |
| UTR3            | 1:115249522-115249540     |                 | 0.001726009 |
| UTR3            | 1:115249198-115249223     |                 | 0.001529511 |
| UTR3            | 1:115248973-115248988     |                 | 0.001271336 |
| ENST00000321437 | ENSG00000166128 (RAB8B)   | hsa-miR-146a-5p | 0.922907    |
| UTR3            | 15:63557120-63557145      |                 | 0.002114001 |
| UTR3            | 15:63559104-63559125      |                 | 0.049165886 |
| ENST00000429071 | ENSG00000006652 (IFRD1)   | hsa-miR-146a-5p | 0.922065    |
| UTR3            | 7:112097939-112097954     |                 | 0.005885721 |
| UTR3            | 7:112098266-112098288     |                 | 0.045201794 |
| ENST00000261177 | ENSG00000110900 (TSPAN11) | hsa-miR-146a-5p | 0.92173     |
| UTR3            | 12:31145155-31145171      |                 | 0.001666292 |
| UTR3            | 12:31145630-31145647      |                 | 0.002280426 |
| UTR3            | 12:31145897-31145909      |                 | 0.00371389  |
| UTR3            | 12:31146440-31146453      |                 | 0.000963115 |
| UTR3            | 12:31146643-31146661      |                 | 0.002592661 |
| UTR3            | 12:31147861-31147882      |                 | 0.006836254 |
| UTR3            | 12:31148669-31148681      |                 | 0.007370486 |
| UTR3            | 12:31148740-31148757      |                 | 0.001943008 |
| UTR3            | 12:31149417-31149438      |                 | 0.023064694 |
|                 | 12:31136085;31144791-     |                 |             |
| UTR3            | 31136085;31144809         |                 | 0.008007945 |
| ENST00000336125 | ENSG00000185829 (ARL17A)  | hsa-miR-146a-5p | 0.921515    |
| UTR3            | 17:44634232-44634259      |                 | 0.026691515 |
| UTR3            | 17:44633999-44634025      |                 | 0.008348582 |
| UTR3            | 17:44632949-44632971      |                 | 0.000886323 |
| UTR3            | 17:44632032-44632059      |                 | 0.006943577 |

|                 |                            |                 |             |
|-----------------|----------------------------|-----------------|-------------|
| UTR3            | 17:44631869-44631884       |                 | 0.002938094 |
| UTR3            | 17:44631701-44631721       |                 | 0.005154619 |
| ENST00000318426 | ENSG00000180861 (C12orf36) | hsa-miR-146a-5p | 0.921444    |
| UTR3            | 12:13525962-13525987       |                 | 0.005662039 |
| UTR3            | 12:13525427-13525448       |                 | 0.045284717 |
| ENST00000265074 | ENSG00000113389 (NPR3)     | hsa-miR-146a-5p | 0.920783    |
| UTR3            | 5:32788326-32788341        |                 | 0.005063542 |
| UTR3            | 5:32789259-32789282        |                 | 0.001856385 |
| UTR3            | 5:32790776-32790803        |                 | 0.004052495 |
| UTR3            | 5:32791778-32791803        |                 | 0.039825615 |
| ENST00000424319 | ENSG00000086991 (NOX4)     | hsa-miR-146a-5p | 0.920029    |
| UTR3            | 11:89059686-89059705       |                 | 0.050629889 |
| ENST00000476605 | ENSG00000107745 (MICU1)    | hsa-miR-146a-5p | 0.919173    |
| UTR3            | 10:74127739-74127766       |                 | 0.021375193 |
| UTR3            | 10:74127607-74127631       |                 | 0.029065472 |
| ENST00000360669 | ENSG00000170074 (FAM153A)  | hsa-miR-146a-5p | 0.918663    |
| UTR3            | 5:177144235-177144262      |                 | 0.001179086 |
| UTR3            | 5:177143395-177143415      |                 | 0.031010738 |
| UTR3            | 5:177139381-177139401      |                 | 0.013043851 |
| UTR3            | 5:177139117-177139140      |                 | 0.005095101 |
| ENST00000299550 | ENSG00000166436 (TRIM66)   | hsa-miR-146a-5p | 0.918273    |
| UTR3            | 11:8638466-8638486         |                 | 0.01929223  |
| UTR3            | 11:8638206-8638226         |                 | 0.005438195 |
| UTR3            | 11:8637527-8637540         |                 | 0.003362398 |
| UTR3            | 11:8637227-8637245         |                 | 0.00153674  |
| UTR3            | 11:8635936-8635951         |                 | 0.001573441 |
| UTR3            | 11:8635132-8635150         |                 | 0.005661055 |
| UTR3            | 11:8634841-8634856         |                 | 0.001369855 |
| UTR3            | 11:8634624-8634640         |                 | 0.009883872 |
| UTR3            | 11:8667374-8667389         |                 | 0.022137617 |
| UTR3            | 11:8661979-8662004         |                 | 0.002903856 |
| ENST00000335154 | ENSG00000161791 (FMNL3)    | hsa-miR-146a-5p | 0.917803    |
| UTR3            | 12:50037697-50037717       |                 | 0.002261838 |
| UTR3            | 12:50037210-50037232       |                 | 0.004385479 |
| UTR3            | 12:50036966-50036985       |                 | 0.001008182 |
| UTR3            | 12:50036618-50036642       |                 | 0.00119013  |
| UTR3            | 12:50034965-50034986       |                 | 0.001897461 |
| UTR3            | 12:50034472-50034492       |                 | 0.002054045 |
| UTR3            | 12:50034022-50034042       |                 | 0.001624567 |
| UTR3            | 12:50033814-50033834       |                 | 0.001833513 |
| UTR3            | 12:50031814-50031836       |                 | 0.033886252 |
| ENST00000442398 | ENSG00000168014 (C2CD3)    | hsa-miR-146a-5p | 0.916923    |
| UTR3            | 11:73745278-73745305       |                 | 0.04254337  |
| UTR3            | 11:73744766-73744782       |                 | 0.004660191 |
| UTR3            | 11:73724449-73724477       |                 | 0.002354983 |

|                 |                            |                 |             |
|-----------------|----------------------------|-----------------|-------------|
| UTR3            | 11:73796788-73796800       |                 | 0.00509441  |
|                 | ENSG00000221870            |                 |             |
| ENST00000408967 | (TMEM257)                  | hsa-miR-146a-5p | 0.916465    |
| UTR3            | X:144909686-144909709      |                 | 0.008712472 |
| UTR3            | X:144910653-144910680      |                 | 0.005533041 |
| UTR3            | X:144911080-144911102      |                 | 0.003643757 |
| UTR3            | X:144911277-144911293      |                 | 0.031964498 |
| ENST00000395407 | ENSG00000137819 (PAQR5)    | hsa-miR-146a-5p | 0.916403    |
| UTR3            | 15:69696768-69696789       |                 | 0.029856955 |
| UTR3            | 15:69697095-69697121       |                 | 0.006735723 |
| UTR3            | 15:69697431-69697449       |                 | 0.004094715 |
| UTR3            | 15:69698728-69698753       |                 | 0.002134986 |
| UTR3            | 15:69698851-69698868       |                 | 0.00090138  |
| UTR3            | 15:69699893-69699907       |                 | 0.006116821 |
| ENST00000524849 | ENSG00000173653 (RCE1)     | hsa-miR-146a-5p | 0.916164    |
|                 | 11:66612705;66612971-      |                 |             |
| UTR3            | 66612708;66612983          |                 | 0.041078409 |
| UTR3            | 11:66613919-66613940       |                 | 0.00871117  |
| ENST00000394323 | ENSG00000213462 (ERV3-1)   | hsa-miR-146a-5p | 0.914867    |
| UTR3            | 7:64451557-64451579        |                 | 0.04951551  |
| ENST00000362063 | ENSG00000198740 (ZNF652)   | hsa-miR-146a-5p | 0.9135      |
| UTR3            | 17:47375686-47375712       |                 | 0.023335745 |
| UTR3            | 17:47373732-47373758       |                 | 0.001634123 |
| UTR3            | 17:47372307-47372323       |                 | 0.004963695 |
| UTR3            | 17:47372208-47372230       |                 | 0.014409093 |
| UTR3            | 17:47371929-47371956       |                 | 0.004887987 |
| ENST00000333926 | ENSG00000122873 (CISD1)    | hsa-miR-146a-5p | 0.913124    |
| UTR3            | 10:60047725-60047744       |                 | 0.007840666 |
| UTR3            | 10:60048611-60048639       |                 | 0.003933345 |
| UTR3            | 10:60049120-60049138       |                 | 0.03737915  |
| ENST00000398146 | ENSG00000185304 (RGPD2)    | hsa-miR-146a-5p | 0.913064    |
| UTR3            | 2:88055771-88055793        |                 | 0.049140704 |
| ENST00000327827 | ENSG00000182831 (C16orf72) | hsa-miR-146a-5p | 0.912795    |
| UTR3            | 16:9211053-9211075         |                 | 0.008908725 |
| UTR3            | 16:9211896-9211916         |                 | 0.03717986  |
| UTR3            | 16:9215427-9215444         |                 | 0.002996832 |
| ENST00000415914 | ENSG00000177683 (THAP5)    | hsa-miR-146a-5p | 0.912487    |
| UTR3            | 7:108204540-108204557      |                 | 0.049022337 |
| ENST00000450908 | ENSG00000231880 (KBTBD4)   | hsa-miR-146a-5p | 0.910796    |
| UTR3            | 11:47599497-47599516       |                 | 0.048679269 |
| ENST00000436010 | ENSG00000169855 (ROBO1)    | hsa-miR-146a-5p | 0.910675    |
| UTR3            | 3:78646395-78646421        |                 | 0.048654833 |
| ENST00000394670 | ENSG0000010244 (ZNF207)    | hsa-miR-146a-5p | 0.910317    |
| UTR3            | 17:30696800-30696825       |                 | 0.01318423  |
| UTR3            | 17:30698222-30698243       |                 | 0.001600884 |

|                 |                                 |                 |             |
|-----------------|---------------------------------|-----------------|-------------|
| UTR3            | 17:30699372-30699383            |                 | 0.001199639 |
| UTR3            | 17:30702968-30702979            |                 | 0.001943835 |
| UTR3            | 17:30703542-30703555            |                 | 0.001183252 |
| UTR3            | 17:30704495-30704515            |                 | 0.001390638 |
| UTR3            | 17:30705340-30705354            |                 | 0.001717228 |
| UTR3            | 17:30708425-30708448            |                 | 0.026363328 |
| ENST00000306434 | ENSG00000168906 (MAT2A)         | hsa-miR-146a-5p | 0.910234    |
| UTR3            | 2:85772336-85772353             |                 | 0.048566439 |
| ENST00000300087 | ENSG00000166847 (DCTN5)         | hsa-miR-146a-5p | 0.910023    |
| UTR3            | 16:23678593-23678608            |                 | 0.007561034 |
| UTR3            | 16:23680144-23680172            |                 | 0.021977088 |
| UTR3            | 16:23680764-23680784            |                 | 0.017467979 |
| UTR3            | 16:23654313-23654336            |                 | 0.016710802 |
| ENST00000379638 | ENSG00000129625 (REEP5)         | hsa-miR-146a-5p | 0.908794    |
| UTR3            | 5:112212087-112212099           |                 | 0.048280475 |
| ENST00000375255 | ENSG00000115827 (DCAF17)        | hsa-miR-146a-5p | 0.908514    |
| UTR3            | 2:172338227-172338243           |                 | 0.003050827 |
| UTR3            | 2:172338359-172338375           |                 | 0.009737604 |
| UTR3            | 2:172340399-172340424           |                 | 0.014980952 |
| UTR3            | 2:172341266-172341292           |                 | 0.017594567 |
| UTR3            | 2:172333382-172333408           |                 | 0.028713584 |
| ENST00000381605 | ENSG00000101307 (SIRPB1)        | hsa-miR-146a-5p | 0.907723    |
| UTR3            | 20:1545749-1545769              |                 | 0.004855969 |
| UTR3            | 20:1544460-1544479              |                 | 0.027308652 |
| UTR3            | 20:1544439-1544463              |                 | 0.015905696 |
| ENST00000316433 | ENSG00000171817 (ZNF540)        | hsa-miR-146a-5p | 0.907103    |
| UTR3            | 19:38104290-38104304            |                 | 0.046686974 |
| UTR3            | 19:38103603-38103623            |                 | 0.013643207 |
| ENST00000453634 | ENSG00000254413 (CHKB-CPT1B)    | hsa-miR-146a-5p | 0.907012    |
| UTR3            | 22:51008017-51008031            |                 | 0.047932122 |
| ENST00000569722 | ENSG00000267127 (RP11-795F19.5) | hsa-miR-146a-5p | 0.905808    |
| UTR3            | 18:77829827-77829842            |                 | 0.011041003 |
| UTR3            | 18:77854277-77854303            |                 | 0.002062248 |
| UTR3            | 18:77854744-77854767            |                 | 0.006212056 |
| UTR3            | 18:77854764-77854782            |                 | 0.028384965 |
| ENST00000326505 | ENSG00000176597 (B3GNT5)        | hsa-miR-146a-5p | 0.905589    |
| UTR3            | 3:182988964-182988988           |                 | 0.04534622  |
| UTR3            | 3:182990217-182990240           |                 | 0.002311973 |
| ENST00000306156 | ENSG00000171132 (PRKCE)         | hsa-miR-146a-5p | 0.905578    |
| UTR3            | 2:46413327-46413339             |                 | 0.002120682 |
| UTR3            | 2:46413959-46413981             |                 | 0.018235749 |
| UTR3            | 2:46414504-46414528             |                 | 0.021886314 |
| UTR3            | 2:46414757-46414780             |                 | 0.005413373 |

|                 |                                        |                 |          |
|-----------------|----------------------------------------|-----------------|----------|
| ENST00000326080 | ENSG00000170271 (FAXDC2)               | hsa-miR-146a-5p | 0.90524  |
| UTR3            | 5:154198689-154198705                  | 0.029777327     |          |
| UTR3            | 5:154198409-154198437                  | 0.017814433     |          |
| ENST00000539768 | ENSG00000177058 (SLC38A9)              | hsa-miR-146a-5p | 0.903343 |
| UTR3            | 5:54931034-54931054                    | 0.032035071     |          |
| UTR3            | 5:54930538-54930564                    | 0.009853264     |          |
| UTR3            | 5:54922107-54922116                    | 0.005345041     |          |
| ENST00000398532 | ENSG00000188895 (MSL1)                 | hsa-miR-146a-5p | 0.902927 |
| UTR3            | 17:38290995-38291015                   | 0.003315317     |          |
| UTR3            | 17:38292279-38292300                   | 0.006035168     |          |
| UTR3            | 17:38292586-38292603                   | 0.007284066     |          |
| UTR3            | 17:38292805-38292819                   | 0.03052112      |          |
| ENST00000263816 | ENSG00000081479 (LRP2)                 | hsa-miR-146a-5p | 0.902583 |
| UTR3            | 2:169984508-169984532                  | 0.002551397     |          |
| UTR3            | 2:169983727-169983753                  | 0.042135638     |          |
| UTR3            | 2:170136060-170136075                  | 0.01078508      |          |
| UTR3            | 2:170033059-170033081                  | 0.006143526     |          |
| UTR3            | 2:170011040-170011058                  | 0.006353665     |          |
| ENST00000491143 | ENSG00000119547 (ONECUT2)              | hsa-miR-146a-5p | 0.901601 |
| UTR3            | 18:55144188-55144204                   | 0.003519184     |          |
| UTR3            | 18:55145988-55146008                   | 0.003749262     |          |
| UTR3            | 18:55146219-55146241                   | 0.002982475     |          |
| UTR3            | 18:55146682-55146703                   | 0.00150389      |          |
| UTR3            | 18:55147026-55147044                   | 0.001423307     |          |
| UTR3            | 18:55147099-55147115                   | 0.00055766      |          |
| UTR3            | 18:55148184-55148203                   | 0.006033746     |          |
| UTR3            | 18:55149145-55149168                   | 0.000613774     |          |
| UTR3            | 18:55149622-55149648                   | 0.00183181      |          |
| UTR3            | 18:55149927-55149938                   | 0.004258154     |          |
| UTR3            | 18:55153730-55153748                   | 0.003697044     |          |
| UTR3            | 18:55157187-55157201                   | 0.001715215     |          |
| UTR3            | 18:55157278-55157300                   | 0.004850741     |          |
| UTR3            | 18:55157307-55157333                   | 0.000834621     |          |
| UTR3            | 18:55157510-55157529                   | 0.00854619      |          |
| UTR3            | 18:55157541-55157559                   | 0.000792845     |          |
| ENST00000338957 | ENSG00000102053 (ZC3H12B)              | hsa-miR-146a-5p | 0.901432 |
| UTR3            | X:64726080-64726102                    | 0.005939501     |          |
| UTR3            | X:64727241-64727268                    | 0.040939248     |          |
| ENST00000392288 | ENSG00000196268 (ZNF493)               | hsa-miR-146a-5p | 0.901147 |
| UTR3            | 19:21607918-21607943                   | 0.00585188      |          |
| UTR3            | 19:21608004-21608027                   | 0.038476993     |          |
| UTR3            | 19:21588650;21605715-21588658;21605727 | 0.023740422     |          |



|                 |                          |                 |          |
|-----------------|--------------------------|-----------------|----------|
| ENST00000447404 | ENSG00000165209 (STRBP)  | hsa-miR-146a-5p | 0.900243 |
| UTR3            | 9:125887711-125887732    | 0.026839795     |          |
| UTR3            | 9:125885022-125885047    | 0.003336137     |          |
| UTR3            | 9:125884552-125884571    | 0.008603742     |          |
| UTR3            | 9:125884008-125884035    | 0.007881634     |          |
| ENST00000591537 | ENSG00000196263 (ZNF471) | hsa-miR-146a-5p | 0.899449 |
| UTR3            | 19:57041044-57041067     | 0.023458668     |          |
| UTR3            | 19:57041301-57041321     | 0.023058558     |          |
| ENST00000551568 | ENSG00000135678 (CPM)    | hsa-miR-146a-5p | 0.898884 |
| UTR3            | 12:69249441-69249463     | 0.03162357      |          |
| UTR3            | 12:69247760-69247787     | 0.001653194     |          |
| UTR3            | 12:69247753-69247773     | 0.001957846     |          |
| UTR3            | 12:69245942-69245968     | 0.003060302     |          |
| UTR3            | 12:69244979-69245002     | 0.008120599     |          |
|                 | ENSG00000181495          |                 |          |
| ENST00000326958 | (AC026703.1)             | hsa-miR-146a-5p | 0.898505 |
| UTR3            | 5:32790776-32790803      | 0.004539658     |          |
| UTR3            | 5:32791778-32791803      | 0.04180779      |          |
| ENST00000397121 | ENSG00000196109 (ZNF676) | hsa-miR-146a-5p | 0.898419 |
| UTR3            | 19:22362713-22362732     | 0.003751524     |          |
| UTR3            | 19:22362378-22362404     | 0.033317623     |          |
|                 | 19:22364376;22375818-    |                 |          |
| UTR3            | 22364388;22375826        | 0.021221949     |          |
| UTR3            | 19:22363889-22363907     | 0.029598937     |          |
| UTR3            | 19:22363049-22363074     | 0.013451312     |          |
|                 | ENSG00000188735          |                 |          |
| ENST00000449592 | (TMEM120B)               | hsa-miR-146a-5p | 0.897705 |
| UTR3            | 12:122214126-122214152   | 0.038357299     |          |
| UTR3            | 12:122216502-122216515   | 0.007847142     |          |
| ENST00000595401 | ENSG00000118620 (ZNF430) | hsa-miR-146a-5p | 0.897022 |
| UTR3            | 19:21217638-21217664     | 0.023164185     |          |
| UTR3            | 19:21218082-21218093     | 0.022919049     |          |
| ENST00000379882 | ENSG00000107201 (DDX58)  | hsa-miR-146a-5p | 0.896644 |
| UTR3            | 9:32456226-32456244      | 0.003854819     |          |
| UTR3            | 9:32456205-32456218      | 0.001906753     |          |
| UTR3            | 9:32456145-32456171      | 0.003219557     |          |
| UTR3            | 9:32455476-32455501      | 0.037035461     |          |
| ENST00000355585 | ENSG00000078269 (SYNJ2)  | hsa-miR-146a-5p | 0.8965   |
| UTR3            | 6:158517676-158517701    | 0.02126433      |          |
| UTR3            | 6:158518254-158518271    | 0.002872755     |          |
| UTR3            | 6:158519169-158519188    | 0.001796125     |          |
| UTR3            | 6:158519527-158519553    | 0.012844049     |          |
| UTR3            | 6:158519773-158519797    | 0.003605396     |          |
| UTR3            | 6:158519873-158519896    | 0.003608452     |          |
| ENST00000336078 | ENSG00000074657 (ZNF532) | hsa-miR-146a-5p | 0.896344 |
| UTR3            | 18:56652900-56652915     | 0.014475897     |          |
| UTR3            | 18:56653289-56653316     | 0.030729767     |          |

|                 |                          |                 |             |
|-----------------|--------------------------|-----------------|-------------|
| UTR3            | 18:56606724-56606742     |                 | 0.007542597 |
| ENST00000359856 | ENSG00000162704 (ARPC5)  | hsa-miR-146a-5p | 0.896009    |
| UTR3            | 1:183595583-183595599    |                 | 0.045904877 |
| ENST00000375537 | ENSG00000204371 (EHMT2)  | hsa-miR-146a-5p | 0.894287    |
| UTR3            | 6:31847560-31847585      |                 | 0.045605021 |
|                 | ENSG00000166292          |                 |             |
| ENST00000424486 | (TMEM100)                | hsa-miR-146a-5p | 0.894059    |
| UTR3            | 17:53797191-53797215     |                 | 0.045565667 |
| ENST00000313732 | ENSG00000153786 (ZDHHC7) | hsa-miR-146a-5p | 0.893061    |
| UTR3            | 16:85008068-85008076     |                 | 0.044685195 |
| UTR3            | 16:85009955-85009982     |                 | 0.006863536 |
| ENST00000483536 | ENSG00000139910 (NOVA1)  | hsa-miR-146a-5p | 0.892508    |
| UTR3            | 14:26916955-26916970     |                 | 0.00399913  |
| UTR3            | 14:26916559-26916568     |                 | 0.003843866 |
| UTR3            | 14:26916476-26916503     |                 | 0.02011346  |
| UTR3            | 14:26915325-26915351     |                 | 0.010102665 |
| UTR3            | 14:26913829-26913849     |                 | 0.003147154 |
| UTR3            | 14:27064730-27064754     |                 | 0.033568342 |
| ENST00000268182 | ENSG00000140575 (IQGAP1) | hsa-miR-146a-5p | 0.89201     |
| UTR3            | 15:91045257-91045285     |                 | 0.045215006 |
| ENST00000491718 | ENSG00000090905 (TNRC6A) | hsa-miR-146a-5p | 0.891757    |
| UTR3            | 16:24801462-24801480     |                 | 0.004358792 |
| UTR3            | 16:24815565-24815588     |                 | 0.002044444 |
| UTR3            | 16:24817017-24817038     |                 | 0.002737361 |
| UTR3            | 16:24835516-24835539     |                 | 0.003755898 |
| UTR3            | 16:24835837-24835860     |                 | 0.005342668 |
| UTR3            | 16:24836045-24836069     |                 | 0.0136901   |
| UTR3            | 16:24836846-24836864     |                 | 0.013242877 |
| ENST00000377200 | ENSG00000188647 (PTAR1)  | hsa-miR-146a-5p | 0.891389    |
| UTR3            | 9:72333010-72333037      |                 | 0.005492955 |
| UTR3            | 9:72332979-72332991      |                 | 0.003742988 |
| UTR3            | 9:72332509-72332524      |                 | 0.008094394 |
| UTR3            | 9:72329658-72329675      |                 | 0.012031297 |
| UTR3            | 9:72329117-72329143      |                 | 0.00251719  |
| UTR3            | 9:72326404-72326423      |                 | 0.001804407 |
| UTR3            | 9:72325873-72325899      |                 | 0.011426724 |
| ENST00000486333 | ENSG00000225932 (CTAGE4) | hsa-miR-146a-5p | 0.890329    |
| UTR3            | 7:143883082-143883105    |                 | 0.017471703 |
| UTR3            | 7:143883118-143883135    |                 | 0.027460037 |
| ENST00000487179 | ENSG00000244693 (CTAGE8) | hsa-miR-146a-5p | 0.890214    |
| UTR3            | 7:143963835-143963858    |                 | 0.017426257 |
| UTR3            | 7:143963805-143963822    |                 | 0.027486165 |

|                 |                                            |                 |          |
|-----------------|--------------------------------------------|-----------------|----------|
| ENST00000409085 | ENSG00000115977 (AAK1)                     | hsa-miR-146a-5p | 0.88979  |
| UTR3            | 2:69702769-69702795                        | 0.007645494     |          |
| UTR3            | 2:69702291-69702312                        | 0.00306278      |          |
| UTR3            | 2:69699316-69699334                        | 0.001339128     |          |
| UTR3            | 2:69699055-69699080                        | 0.001739327     |          |
| UTR3            | 2:69697383-69697409                        | 0.0014199       |          |
| UTR3            | 2:69696254-69696277                        | 0.001304689     |          |
| UTR3            | 2:69696000-69696015                        | 0.002036837     |          |
| UTR3            | 2:69695887-69695911                        | 0.026293546     |          |
| ENST00000237937 | ENSG00000107372 (ZFAND5)                   | hsa-miR-146a-5p | 0.88909  |
| UTR3            | 9:74970770-74970795                        | 0.011220361     |          |
| UTR3            | 9:74966898-74966919                        | 0.033504992     |          |
| ENST00000296028 | ENSG00000163736 (PPBP)                     | hsa-miR-146a-5p | 0.888667 |
| UTR3            | 4:74852912-74852935                        | 0.044655385     |          |
| ENST00000532519 | ENSG00000149428 (HYOU1)                    | hsa-miR-146a-5p | 0.888643 |
| UTR3            | 11:118925757;118925897-118925772;118925901 | 0.023742511     |          |
| UTR3            | 11:118925729-118925757                     | 0.017257334     |          |
| UTR3            | 11:118925714-118925739                     | 0.003651588     |          |
| ENST00000398417 | ENSG00000141646 (SMAD4)                    | hsa-miR-146a-5p | 0.88844  |
| UTR3            | 18:48605219-48605234                       | 0.042237913     |          |
| UTR3            | 18:48609915-48609940                       | 0.00237992      |          |
| ENST00000376351 | ENSG00000151025 (GPR158)                   | hsa-miR-146a-5p | 0.888382 |
| UTR3            | 10:25889496-25889516                       | 0.003005168     |          |
| UTR3            | 10:25890087-25890113                       | 0.00275966      |          |
| UTR3            | 10:25890697-25890713                       | 0.005908377     |          |
| UTR3            | 10:25890869-25890894                       | 0.025376522     |          |
| UTR3            | 10:25891023-25891036                       | 0.006377155     |          |
| UTR3            | 10:25887823-25887840                       | 0.010736726     |          |
| ENST00000409558 | ENSG00000143952 (VPS54)                    | hsa-miR-146a-5p | 0.88802  |
| UTR3            | 2:64119695-64119713                        | 0.044548806     |          |
| ENST00000217130 | ENSG00000196700 (ZNF512B)                  | hsa-miR-146a-5p | 0.887447 |
| UTR3            | 20:62591149-62591175                       | 0.015982295     |          |
| UTR3            | 20:62588308-62588331                       | 0.028472553     |          |
| ENST00000434009 | ENSG00000009413 (REV3L)                    | hsa-miR-146a-5p | 0.886964 |
| UTR3            | 6:111793223-111793241                      | 0.007616599     |          |
| UTR3            | 6:111737582-111737603                      | 0.005373804     |          |
| UTR3            | 6:111710332-111710358                      | 0.003835714     |          |
| UTR3            | 6:111709223-111709249                      | 0.003202364     |          |
| UTR3            | 6:111709069-111709081                      | 0.003993808     |          |
| UTR3            | 6:111697636-111697658                      | 0.002273759     |          |
| UTR3            | 6:111695228-111695248                      | 0.00264594      |          |
| UTR3            | 6:111695035-111695052                      | 0.002568533     |          |
| UTR3            | 6:111694760-111694772                      | 0.001761053     |          |
| UTR3            | 6:111688770-111688794                      | 0.001953287     |          |

|                 |                           |                 |             |
|-----------------|---------------------------|-----------------|-------------|
| UTR3            | 6:111685138-111685160     |                 | 0.002288742 |
| UTR3            | 6:111654417-111654443     |                 | 0.001460498 |
| UTR3            | 6:111632447-111632460     |                 | 0.003524855 |
| UTR3            | 6:111631101-111631122     |                 | 0.00187689  |
| ENST00000249064 | ENSG00000159873 (CCDC117) | hsa-miR-146a-5p | 0.886368    |
| UTR3            | 22:29184985-29185006      |                 | 0.044278921 |
| ENST00000335251 | ENSG00000164066 (INTU)    | hsa-miR-146a-5p | 0.885591    |
| UTR3            | 4:128637931-128637959     |                 | 0.00461416  |
| UTR3            | 4:128638344-128638357     |                 | 0.00488379  |
| UTR3            | 4:128639350-128639370     |                 | 0.002532676 |
| UTR3            | 4:128639403-128639422     |                 | 0.000519055 |
| UTR3            | 4:128639456-128639475     |                 | 0.002227915 |
| UTR3            | 4:128639816-128639836     |                 | 0.005405006 |
| UTR3            | 4:128642615-128642641     |                 | 0.000779584 |
| UTR3            | 4:128642792-128642804     |                 | 0.006355016 |
| UTR3            | 4:128642925-128642951     |                 | 0.015527957 |
| UTR3            | 4:128643219-128643237     |                 | 0.001308123 |
| ENST00000376773 | ENSG00000204619 (PPP1R11) | hsa-miR-146a-5p | 0.885378    |
| UTR3            | 6:30037325-30037348       |                 | 0.025670123 |
| UTR3            | 6:30037614-30037624       |                 | 0.002681037 |
| UTR3            | 6:30037941-30037960       |                 | 0.015767847 |
| ENST00000541208 | ENSG00000182983 (ZNF662)  | hsa-miR-146a-5p | 0.883529    |
| UTR3            | 3:42957613-42957630       |                 | 0.004358254 |
| UTR3            | 3:42958676-42958701       |                 | 0.001037858 |
| UTR3            | 3:42959183-42959209       |                 | 0.001931125 |
| UTR3            | 3:42959920-42959943       |                 | 0.00118073  |
| UTR3            | 3:42960751-42960764       |                 | 0.035315211 |
| ENST00000608642 | ENSG00000133424 (LARGE)   | hsa-miR-146a-5p | 0.883427    |
| UTR3            | 22:33562218-33562242      |                 | 0.005438238 |
| UTR3            | 22:33561426-33561447      |                 | 0.00204529  |
| UTR3            | 22:33560358-33560379      |                 | 0.002123222 |
| UTR3            | 22:33559949-33559964      |                 | 0.000860168 |
| UTR3            | 22:33558499-33558512      |                 | 0.00934069  |
| UTR3            | 22:33558373-33558396      |                 | 0.02399942  |
| ENST00000240093 | ENSG00000104290 (FZD3)    | hsa-miR-146a-5p | 0.883314    |
| UTR3            | 8:28420938-28420959       |                 | 0.005381406 |
| UTR3            | 8:28421095-28421112       |                 | 0.003649304 |
| UTR3            | 8:28422617-28422627       |                 | 0.001436096 |
| UTR3            | 8:28423412-28423436       |                 | 0.005613947 |
| UTR3            | 8:28426923-28426946       |                 | 0.001676104 |
| UTR3            | 8:28426993-28427015       |                 | 0.003267751 |
| UTR3            | 8:28427337-28427354       |                 | 0.003280566 |
| UTR3            | 8:28428185-28428206       |                 | 0.002777862 |
| UTR3            | 8:28428204-28428225       |                 | 0.000592374 |
| UTR3            | 8:28428488-28428502       |                 | 0.001073201 |

|                 |                            |                 |             |
|-----------------|----------------------------|-----------------|-------------|
| UTR3            | 8:28428566-28428583        |                 | 0.00165531  |
| UTR3            | 8:28429191-28429209        |                 | 0.002333534 |
| UTR3            | 8:28429650-28429670        |                 | 0.001477027 |
| UTR3            | 8:28429843-28429859        |                 | 0.001904996 |
| UTR3            | 8:28431166-28431180        |                 | 0.003786649 |
| UTR3            | 8:28420388-28420407        |                 | 0.030120813 |
| ENST00000361320 | ENSG00000198739 (LRRTM3)   | hsa-miR-146a-5p | 0.882552    |
| UTR3            | 10:68858248-68858256       |                 | 0.043668663 |
| ENST00000367667 | ENSG00000143207 (RFWD2)    | hsa-miR-146a-5p | 0.882188    |
| UTR3            | 1:176085761-176085784      |                 | 0.040439318 |
| UTR3            | 1:175956150-175956167      |                 | 0.003172006 |
| ENST00000318887 | ENSG00000179021 (C3orf38)  | hsa-miR-146a-5p | 0.882017    |
| UTR3            | 3:88206295-88206309        |                 | 0.040289984 |
| UTR3            | 3:88206476-88206500        |                 | 0.003294384 |
| ENST00000295461 | ENSG00000163293 (NIPAL1)   | hsa-miR-146a-5p | 0.881988    |
| UTR3            | 4:48038629-48038643        |                 | 0.004049145 |
| UTR3            | 4:48039236-48039264        |                 | 0.002710576 |
| UTR3            | 4:48039901-48039916        |                 | 0.002117295 |
| UTR3            | 4:48041848-48041875        |                 | 0.005744103 |
| UTR3            | 4:48042049-48042063        |                 | 0.02698864  |
| UTR3            | 4:48035069-48035096        |                 | 0.016447884 |
| ENST00000538204 | ENSG00000076770 (MBNL3)    | hsa-miR-146a-5p | 0.8819      |
| UTR3            | X:131512813-131512832      |                 | 0.003660399 |
| UTR3            | X:131510555-131510567      |                 | 0.00127024  |
| UTR3            | X:131507596-131507615      |                 | 0.022315026 |
| UTR3            | X:131505209-131505226      |                 | 0.003127786 |
| UTR3            | X:131504841-131504867      |                 | 0.001775066 |
| UTR3            | X:131504727-131504743      |                 | 0.000713365 |
| UTR3            | X:131503558-131503585      |                 | 0.010704179 |
| ENST00000581347 | ENSG00000206432 (TMEM200C) | hsa-miR-146a-5p | 0.880879    |
| UTR3            | 18:5889722-5889748         |                 | 0.033788632 |
| UTR3            | 18:5889178-5889194         |                 | 0.002272513 |
| UTR3            | 18:5888359-5888375         |                 | 0.001716028 |
| UTR3            | 18:5882620-5882641         |                 | 0.005629241 |
| ENST00000331343 | ENSG00000186866 (POFUT2)   | hsa-miR-146a-5p | 0.880671    |
| UTR3            | 21:46687294-46687309       |                 | 0.033412011 |
| UTR3            | 21:46686477-46686505       |                 | 0.001633298 |
| UTR3            | 21:46685616-46685639       |                 | 0.003438071 |
| UTR3            | 21:46685583-46685604       |                 | 0.000804293 |
| UTR3            | 21:46684063-46684081       |                 | 0.004086357 |
| ENST00000371655 | ENSG00000169213 (RAB3B)    | hsa-miR-146a-5p | 0.880267    |
| UTR3            | 1:52385438-52385452        |                 | 0.004249603 |
| UTR3            | 1:52385176-52385199        |                 | 0.003765413 |

|                 |                                       |                 |             |
|-----------------|---------------------------------------|-----------------|-------------|
| UTR3            | 1:52380232-52380257                   |                 | 0.002078708 |
| UTR3            | 1:52378822-52378846                   |                 | 0.001544235 |
| UTR3            | 1:52378484-52378510                   |                 | 0.001376216 |
| UTR3            | 1:52377133-52377149                   |                 | 0.007168358 |
| UTR3            | 1:52377124-52377149                   |                 | 0.00065915  |
| UTR3            | 1:52376920-52376930                   |                 | 0.00179184  |
| UTR3            | 1:52376902-52376923                   |                 | 0.003109456 |
| UTR3            | 1:52376756-52376773                   |                 | 0.000882303 |
| UTR3            | 1:52375950-52375975                   |                 | 0.001363112 |
| UTR3            | 1:52373898-52373922                   |                 | 0.011145842 |
| UTR3            | 1:52373852-52373865                   |                 | 0.004177053 |
| ENST00000368069 | ENSG00000122218 (COPA)                | hsa-miR-146a-5p | 0.880251    |
| UTR3            | 1:160259756-160259781                 |                 | 0.004712116 |
| UTR3            | 1:160259103-160259114                 |                 | 0.030142655 |
| UTR3            | 1:160259094-160259114                 |                 | 0.008454108 |
| ENST00000310823 | ENSG00000151694 (ADAM17)              | hsa-miR-146a-5p | 0.879744    |
| UTR3            | 2:9628760-9628782                     |                 | 0.043230345 |
| ENST00000395745 | ENSG00000132153 (DHX30)               | hsa-miR-146a-5p | 0.879602    |
| UTR3            | 3:47868867-47868884                   |                 | 0.010499306 |
| UTR3            | 3:47890563;47890682-47890569;47890701 |                 | 0.032709078 |
| ENST00000339140 | ENSG00000189299 (FOXR2)               | hsa-miR-146a-5p | 0.879586    |
| UTR3            | X:55651752-55651771                   |                 | 0.043206027 |
| ENST00000309395 | ENSG00000173542 (MOB1B)               | hsa-miR-146a-5p | 0.879435    |
| UTR3            | 4:71849989-71850014                   |                 | 0.00375675  |
| UTR3            | 4:71851570-71851590                   |                 | 0.001170711 |
| UTR3            | 4:71851860-71851876                   |                 | 0.002008575 |
| UTR3            | 4:71852727-71852748                   |                 | 0.023385586 |
| UTR3            | 4:71853025-71853045                   |                 | 0.011921542 |
| UTR3            | 4:71824633-71824647                   |                 | 0.008073214 |
| ENST00000328252 | ENSG00000182752 (PAPPA)               | hsa-miR-146a-5p | 0.879265    |
| UTR3            | 9:119160213-119160234                 |                 | 0.004440191 |
| UTR3            | 9:119164075-119164103                 |                 | 0.024064301 |
| UTR3            | 9:119164424-119164449                 |                 | 0.014652078 |
| ENST00000608933 | ENSG00000163644 (PPM1K)               | hsa-miR-146a-5p | 0.879089    |
| UTR3            | 4:89183238-89183265                   |                 | 0.010689188 |
| UTR3            | 4:89182614-89182626                   |                 | 0.019410223 |
| UTR3            | 4:89180468-89180488                   |                 | 0.001313765 |
| UTR3            | 4:89179317-89179329                   |                 | 0.011716216 |
| ENST00000380317 | ENSG00000099385 (BCL7C)               | hsa-miR-146a-5p | 0.878849    |
| UTR3            | 16:30845329-30845350                  |                 | 0.035413459 |
| UTR3            | 16:30845301-30845322                  |                 | 0.004898895 |
| UTR3            | 16:30844989-30845017                  |                 | 0.00278017  |
| ENST00000460930 | ENSG00000203690 (TCP10)               | hsa-miR-146a-5p | 0.878305    |
| UTR3            | 6:167787895-167787923                 |                 | 0.001763689 |
| UTR3            | 6:167787702-167787713                 |                 | 0.003032952 |

|                 |                           |                 |             |
|-----------------|---------------------------|-----------------|-------------|
| UTR3            | 6:167787514-167787535     |                 | 0.038212567 |
| ENST00000357758 | ENSG00000100523 (DDHD1)   | hsa-miR-146a-5p | 0.878237    |
| UTR3            | 14:53512826-53512840      |                 | 0.005164165 |
| UTR3            | 14:53512326-53512336      |                 | 0.006423995 |
| UTR3            | 14:53511768-53511787      |                 | 0.002381937 |
| UTR3            | 14:53511282-53511300      |                 | 0.027661878 |
| UTR3            | 14:53521304-53521326      |                 | 0.011422172 |
| ENST00000194672 | ENSG00000082269 (FAM135A) | hsa-miR-146a-5p | 0.877001    |
| UTR3            | 6:71195889-71195908       |                 | 0.008035908 |
| UTR3            | 6:71233713-71233728       |                 | 0.016936981 |
| UTR3            | 6:71235897-71235924       |                 | 0.011808879 |
| UTR3            | 6:71270245-71270273       |                 | 0.006029027 |
| ENST00000530332 | ENSG00000170619 (COMMD5)  | hsa-miR-146a-5p | 0.876235    |
| UTR3            | 8:146066574-146066591     |                 | 0.042694905 |
| ENST00000304129 | ENSG00000169129 (AFAP1L2) | hsa-miR-146a-5p | 0.875534    |
| UTR3            | 10:116055322-116055340    |                 | 0.009606495 |
| UTR3            | 10:116054710-116054735    |                 | 0.031486802 |
| UTR3            | 10:116061203-116061224    |                 | 0.012209933 |
| ENST00000361170 | ENSG00000183856 (IQGAP3)  | hsa-miR-146a-5p | 0.875294    |
| UTR3            | 1:156496153-156496168     |                 | 0.002159496 |
| UTR3            | 1:156495653-156495677     |                 | 0.003310611 |
| UTR3            | 1:156495502-156495520     |                 | 0.033857824 |
| UTR3            | 1:156495337-156495352     |                 | 0.003225716 |
| ENST00000288266 | ENSG00000157500 (APPL1)   | hsa-miR-146a-5p | 0.874913    |
| UTR3            | 3:57304401-57304419       |                 | 0.038551479 |
| UTR3            | 3:57306092-57306118       |                 | 0.001315601 |
| UTR3            | 3:57306834-57306849       |                 | 0.00262959  |
| ENST00000559228 | ENSG00000128923 (FAM63B)  | hsa-miR-146a-5p | 0.874039    |
| UTR3            | 15:59150524-59150539      |                 | 0.002401236 |
| UTR3            | 15:59151236-59151262      |                 | 0.00215856  |
| UTR3            | 15:59151686-59151708      |                 | 0.003835109 |
| UTR3            | 15:59151766-59151792      |                 | 0.000673299 |
| UTR3            | 15:59152813-59152828      |                 | 0.018873515 |
| UTR3            | 15:59153503-59153529      |                 | 0.014424807 |
| ENST00000377669 | ENSG00000118922 (KLF12)   | hsa-miR-146a-5p | 0.873972    |
| UTR3            | 13:74268339-74268365      |                 | 0.017585594 |
| UTR3            | 13:74264581-74264602      |                 | 0.001824137 |
| UTR3            | 13:74264573-74264597      |                 | 0.000583357 |
| UTR3            | 13:74262746-74262767      |                 | 0.001549094 |
| UTR3            | 13:74262675-74262694      |                 | 0.00055678  |
| UTR3            | 13:74262479-74262505      |                 | 0.008213742 |
| UTR3            | 13:74262110-74262137      |                 | 0.000972156 |

|                 |                            |                 |             |
|-----------------|----------------------------|-----------------|-------------|
| UTR3            | 13:74260424-74260448       |                 | 0.006680963 |
| UTR3            | 13:74289534-74289559       |                 | 0.031517243 |
| ENST00000449987 | ENSG00000139746 (RBM26)    | hsa-miR-146a-5p | 0.873388    |
| UTR3            | 13:79888956-79888963       |                 | 0.027473727 |
| UTR3            | 13:79888831-79888857       |                 | 0.010952664 |
| UTR3            | 13:79887432-79887458       |                 | 0.002008815 |
| UTR3            | 13:79887314-79887330       |                 | 0.001834874 |
| ENST00000282878 | ENSG00000152932 (RAB3C)    | hsa-miR-146a-5p | 0.872873    |
| UTR3            | 5:58147434-58147461        |                 | 0.010292296 |
| UTR3            | 5:58147660-58147681        |                 | 0.003076543 |
| UTR3            | 5:58148190-58148211        |                 | 0.00175417  |
| UTR3            | 5:58148675-58148702        |                 | 0.001637334 |
| UTR3            | 5:58148870-58148885        |                 | 0.001226166 |
| UTR3            | 5:58149192-58149211        |                 | 0.001025845 |
| UTR3            | 5:58149583-58149603        |                 | 0.001710345 |
| UTR3            | 5:58151839-58151862        |                 | 0.001465906 |
| UTR3            | 5:58151942-58151959        |                 | 0.000887452 |
| UTR3            | 5:58152209-58152229        |                 | 0.009631851 |
| UTR3            | 5:58153341-58153360        |                 | 0.002007053 |
| UTR3            | 5:58153941-58153954        |                 | 0.005441356 |
| UTR3            | 5:58154861-58154886        |                 | 0.002037737 |
| ENST00000527531 | ENSG00000166323 (C11orf65) | hsa-miR-146a-5p | 0.872651    |
| UTR3            | 11:108226508-108226533     |                 | 0.036921392 |
| UTR3            | 11:108202116-108202141     |                 | 0.005239956 |
| ENST00000402045 | ENSG00000106003 (LFNG)     | hsa-miR-146a-5p | 0.872625    |
| UTR3            | 7:2567985-2567997          |                 | 0.042157568 |
| ENST00000428797 | ENSG00000022355 (GABRA1)   | hsa-miR-146a-5p | 0.871911    |
| UTR3            | 5:161324464-161324487      |                 | 0.031101429 |
| UTR3            | 5:161325265-161325288      |                 | 0.002762582 |
| UTR3            | 5:161326187-161326214      |                 | 0.00419722  |
| UTR3            | 5:161326481-161326497      |                 | 0.00338891  |
| UTR3            | 5:161322772-161322793      |                 | 0.00499573  |
| ENST00000360380 | ENSG00000123473 (STIL)     | hsa-miR-146a-5p | 0.871764    |
| UTR3            | 1:47716631-47716655        |                 | 0.039198069 |
| UTR3            | 1:47755221-47755246        |                 | 0.021349662 |
| ENST00000437844 | ENSG00000148516 (ZEB1)     | hsa-miR-146a-5p | 0.871648    |
| UTR3            | 10:31676171-31676190       |                 | 0.00853504  |
| UTR3            | 10:31809398-31809422       |                 | 0.011144163 |
| UTR3            | 10:31815704-31815727       |                 | 0.001732788 |
| UTR3            | 10:31815729-31815747       |                 | 0.000613922 |
| UTR3            | 10:31817689-31817703       |                 | 0.004730585 |
| UTR3            | 10:31818590-31818615       |                 | 0.015257919 |
| ENST00000335712 | ENSG00000119866 (BCL11A)   | hsa-miR-146a-5p | 0.870897    |
| UTR3            | 2:60687290-60687304        |                 | 0.027979964 |
| UTR3            | 2:60686689-60686714        |                 | 0.004554857 |



|                 |                           |                 |             |
|-----------------|---------------------------|-----------------|-------------|
| UTR3            | 2:60685213-60685229       |                 | 0.009370192 |
| ENST00000429989 | ENSG00000108219 (TSPAN14) | hsa-miR-146a-5p | 0.870433    |
| UTR3            | 10:82278521-82278545      |                 | 0.008876355 |
| UTR3            | 10:82280054-82280073      |                 | 0.001397661 |
| UTR3            | 10:82280256-82280282      |                 | 0.001211949 |
| UTR3            | 10:82280630-82280650      |                 | 0.001685567 |
| UTR3            | 10:82280967-82280987      |                 | 0.000794967 |
| UTR3            | 10:82281347-82281359      |                 | 0.003193286 |
| UTR3            | 10:82283117-82283141      |                 | 0.002288527 |
| UTR3            | 10:82283744-82283770      |                 | 0.000929983 |
| UTR3            | 10:82287965-82287989      |                 | 0.002650809 |
| UTR3            | 10:82288712-82288736      |                 | 0.008832677 |
| UTR3            | 10:82289091-82289114      |                 | 0.001102502 |
| UTR3            | 10:82289257-82289273      |                 | 0.001330126 |
| UTR3            | 10:82291783-82291804      |                 | 0.005551705 |
| UTR3            | 10:82291789-82291817      |                 | 0.001991551 |
| ENST00000457153 | ENSG00000067715 (SYT1)    | hsa-miR-146a-5p | 0.869427    |
| UTR3            | 12:79844490-79844498      |                 | 0.041692355 |
| ENST00000257290 | ENSG00000134853 (PDGFRA)  | hsa-miR-146a-5p | 0.86926     |
| UTR3            | 4:55162416-55162440       |                 | 0.023389211 |
| UTR3            | 4:55162454-55162478       |                 | 0.001578997 |
| UTR3            | 4:55162731-55162751       |                 | 0.012663279 |
| UTR3            | 4:55163739-55163763       |                 | 0.004036736 |
| ENST00000454189 | ENSG00000046653 (GPM6B)   | hsa-miR-146a-5p | 0.868404    |
| UTR3            | X:13792398-13792421       |                 | 0.0184068   |
| UTR3            | X:13792102-13792116       |                 | 0.005043944 |
| UTR3            | X:13791945-13791961       |                 | 0.013682538 |
| UTR3            | X:13791189-13791210       |                 | 0.002298578 |
| UTR3            | X:13790465-13790482       |                 | 0.002113711 |
| ENST00000478500 | ENSG00000107242 (PIP5K1B) | hsa-miR-146a-5p | 0.867783    |
| UTR3            | 9:71624080-71624091       |                 | 0.041456815 |
| ENST00000610020 | ENSG00000122484 (RPAP2)   | hsa-miR-146a-5p | 0.867238    |
| UTR3            | 1:92854576-92854600       |                 | 0.001274171 |
| UTR3            | 1:92859217-92859244       |                 | 0.002354295 |
| UTR3            | 1:92859789-92859810       |                 | 0.002882308 |
| UTR3            | 1:92860306-92860318       |                 | 0.005335236 |
| UTR3            | 1:92864870-92864888       |                 | 0.024695178 |
| UTR3            | 1:92865283-92865305       |                 | 0.002280382 |
| UTR3            | 1:92867223-92867240       |                 | 0.002557845 |
| ENST00000361717 | ENSG00000145365 (TIFA)    | hsa-miR-146a-5p | 0.867095    |
| UTR3            | 4:113198740-113198766     |                 | 0.011690925 |
| UTR3            | 4:113198425-113198442     |                 | 0.017154173 |
| UTR3            | 4:113196720-113196747     |                 | 0.004409104 |
| UTR3            | 4:113196268-113196295     |                 | 0.004299323 |

|                 |                           |                 |             |
|-----------------|---------------------------|-----------------|-------------|
| UTR3            | 4:113199324-113199343     |                 | 0.014130796 |
| UTR3            | 4:113199047-113199061     |                 | 0.012759007 |
| ENST00000297107 | ENSG00000164574 (GALNT10) | hsa-miR-146a-5p | 0.867065    |
| UTR3            | 5:153797062-153797081     |                 | 0.002484148 |
| UTR3            | 5:153797535-153797552     |                 | 0.036181836 |
| UTR3            | 5:153799093-153799109     |                 | 0.002688871 |
| ENST00000357085 | ENSG00000112343 (TRIM38)  | hsa-miR-146a-5p | 0.866765    |
| UTR3            | 6:25984221-25984248       |                 | 0.004799072 |
| UTR3            | 6:25987280-25987292       |                 | 0.036513247 |
| ENST00000523756 | ENSG00000042832 (TG)      | hsa-miR-146a-5p | 0.86628     |
| UTR3            | 8:133953670-133953687     |                 | 0.004375484 |
| UTR3            | 8:134042194-134042221     |                 | 0.002170721 |
| UTR3            | 8:134108563-134108580     |                 | 0.005962653 |
| UTR3            | 8:134145725-134145741     |                 | 0.028734872 |
| ENST00000330796 | ENSG00000185238 (PRMT3)   | hsa-miR-146a-5p | 0.865991    |
| UTR3            | 11:20417367-20417389      |                 | 0.006716912 |
|                 | 11:20515505;20515713-     |                 |             |
| UTR3            | 20515515;20515723         |                 | 0.00207816  |
| UTR3            | 11:20529894-20529906      |                 | 0.002747902 |
| UTR3            | 11:20530080-20530101      |                 | 0.014009601 |
| UTR3            | 11:20530519-20530541      |                 | 0.015650479 |
| ENST00000439944 | ENSG00000172061 (LRRC15)  | hsa-miR-146a-5p | 0.865799    |
| UTR3            | 3:194079633-194079650     |                 | 0.013725037 |
| UTR3            | 3:194079522-194079540     |                 | 0.00795652  |
| UTR3            | 3:194079484-194079497     |                 | 0.004549488 |
| UTR3            | 3:194076205-194076225     |                 | 0.014944986 |
| ENST00000356722 | ENSG00000145965 (C6ORF50) | hsa-miR-146a-5p | 0.865701    |
| UTR3            | 6:3984021-3984044         |                 | 0.005609265 |
| UTR3            | 6:3984308-3984320         |                 | 0.035552923 |
| ENST00000588072 | ENSG00000154889 (MPPE1)   | hsa-miR-146a-5p | 0.865636    |
| UTR3            | 18:11884320-11884343      |                 | 0.004845538 |
| UTR3            | 18:11884270-11884278      |                 | 0.016917076 |
| UTR3            | 18:11884225-11884249      |                 | 0.003567424 |
| UTR3            | 18:11884034-11884052      |                 | 0.01480929  |
| UTR3            | 18:11885782-11885802      |                 | 0.007941433 |
| ENST00000242728 | ENSG00000123095 (BHLHE41) | hsa-miR-146a-5p | 0.864661    |
| UTR3            | 12:26274510-26274529      |                 | 0.020606212 |
| UTR3            | 12:26273097-26273121      |                 | 0.020410338 |
| ENST00000372692 | ENSG00000119335 (SET)     | hsa-miR-146a-5p | 0.86459     |
| UTR3            | 9:131457082-131457096     |                 | 0.037058691 |
| UTR3            | 9:131455159-131455185     |                 | 0.027382555 |
| ENST00000424789 | ENSG00000170921 (TANC2)   | hsa-miR-146a-5p | 0.864081    |
| UTR3            | 17:61499380-61499395      |                 | 0.011513763 |
| UTR3            | 17:61499382-61499410      |                 | 0.008250654 |

|                 |                            |                 |             |
|-----------------|----------------------------|-----------------|-------------|
| UTR3            | 17:61500174-61500186       |                 | 0.002701374 |
| UTR3            | 17:61500855-61500875       |                 | 0.001871319 |
| UTR3            | 17:61501183-61501202       |                 | 0.000961625 |
| UTR3            | 17:61501209-61501237       |                 | 0.000345591 |
| UTR3            | 17:61501431-61501458       |                 | 0.001824288 |
| UTR3            | 17:61502718-61502739       |                 | 0.001905023 |
| UTR3            | 17:61504765-61504785       |                 | 0.009389586 |
| UTR3            | 17:61432300-61432325       |                 | 0.016087132 |
| ENST00000496384 | ENSG00000157764 (BRAF)     | hsa-miR-146a-5p | 0.862903    |
| UTR3            | 7:140425859-140425874      |                 | 0.005114732 |
| UTR3            | 7:140425543-140425565      |                 | 0.00332037  |
| UTR3            | 7:140425476-140425497      |                 | 0.004025534 |
| UTR3            | 7:140420736-140420758      |                 | 0.005561867 |
| UTR3            | 7:140419632-140419655      |                 | 0.003050794 |
| UTR3            | 7:140419451-140419471      |                 | 0.003741559 |
| UTR3            | 7:140419381-140419406      |                 | 0.006898935 |
| UTR3            | 7:140419337-140419354      |                 | 0.0090586   |
| ENST00000504228 | ENSG00000109265 (KIAA1211) | hsa-miR-146a-5p | 0.862686    |
| UTR3            | 4:57194164-57194189        |                 | 0.037143102 |
|                 | 4:57173864;57176832-       |                 |             |
| UTR3            | 57173865;57176853          |                 | 0.015365145 |
| UTR3            | 4:57181808-57181827        |                 | 0.009677894 |
| ENST00000327245 | ENSG00000118322 (ATP10B)   | hsa-miR-146a-5p | 0.862312    |
| UTR3            | 5:159992191-159992210      |                 | 0.035918896 |
| UTR3            | 5:159990382-159990405      |                 | 0.004771925 |
| ENST00000531813 | ENSG00000075239 (ACAT1)    | hsa-miR-146a-5p | 0.861283    |
| UTR3            | 11:108013198-108013223     |                 | 0.012830262 |
| UTR3            | 11:108014184-108014202     |                 | 0.027719424 |
| ENST00000475243 | ENSG00000124164 (VAPB)     | hsa-miR-146a-5p | 0.861256    |
| UTR3            | 20:57020221-57020241       |                 | 0.001756563 |
| UTR3            | 20:57021822-57021849       |                 | 0.001216652 |
| UTR3            | 20:57023185-57023196       |                 | 0.004317453 |
| UTR3            | 20:57023845-57023865       |                 | 0.001837278 |
| UTR3            | 20:57025521-57025543       |                 | 0.02403161  |
| UTR3            | 20:57025680-57025695       |                 | 0.001689584 |
| UTR3            | 20:57026027-57026048       |                 | 0.00569678  |
| ENST00000361138 | ENSG00000198887 (SMC5)     | hsa-miR-146a-5p | 0.861086    |
| UTR3            | 9:72967481-72967501        |                 | 0.03611848  |
| UTR3            | 9:72968122-72968143        |                 | 0.004404149 |
| ENST00000460813 | ENSG00000163617 (KIAA1407) | hsa-miR-146a-5p | 0.860884    |
| UTR3            | 3:113755907-113755934      |                 | 0.029494793 |
| UTR3            | 3:113750597-113750616      |                 | 0.005915099 |
| UTR3            | 3:113729826-113729843      |                 | 0.005085227 |
| ENST00000415541 | ENSG00000160584 (SIK3)     | hsa-miR-146a-5p | 0.86074     |
| UTR3            | 11:116734465-116734483     |                 | 0.004381748 |

|                 |                          |                 |             |
|-----------------|--------------------------|-----------------|-------------|
| UTR3            | 11:116719964-116719985   |                 | 0.013519895 |
| UTR3            | 11:116718243-116718267   |                 | 0.022573782 |
| ENST00000373656 | ENSG00000171448 (ZBTB26) | hsa-miR-146a-5p | 0.860656    |
| UTR3            | 9:125678455-125678476    |                 | 0.035830244 |
| UTR3            | 9:125682099-125682119    |                 | 0.030735829 |
| ENST00000283365 | ENSG00000134769 (DTNA)   | hsa-miR-146a-5p | 0.860642    |
| UTR3            | 18:32467909-32467931     |                 | 0.010646252 |
| UTR3            | 18:32469185-32469210     |                 | 0.012845126 |
| UTR3            | 18:32469763-32469791     |                 | 0.010736779 |
| UTR3            | 18:32391983-32392000     |                 | 0.029386347 |
| UTR3            | 18:32398242-32398257     |                 | 0.009735065 |
|                 | ENSG00000140873          |                 |             |
| ENST00000282849 | (ADAMTS18)               | hsa-miR-146a-5p | 0.860332    |
| UTR3            | 16:77316639-77316664     |                 | 0.019225708 |
| UTR3            | 16:77316160-77316178     |                 | 0.021194214 |
| ENST00000444766 | ENSG00000108506 (INTS2)  | hsa-miR-146a-5p | 0.860187    |
| UTR3            | 17:59944375-59944399     |                 | 0.040400118 |
| ENST00000020926 | ENSG00000019505 (SYT13)  | hsa-miR-146a-5p | 0.860152    |
| UTR3            | 11:45265119-45265133     |                 | 0.022504246 |
| UTR3            | 11:45264599-45264626     |                 | 0.001354432 |
| UTR3            | 11:45262736-45262754     |                 | 0.016536805 |
| ENST00000357345 | ENSG00000159082 (SYNJ1)  | hsa-miR-146a-5p | 0.859695    |
| UTR3            | 21:34003850-34003873     |                 | 0.017225826 |
| UTR3            | 21:34003735-34003759     |                 | 0.005268533 |
| UTR3            | 21:34003120-34003130     |                 | 0.003712285 |
| UTR3            | 21:34002231-34002247     |                 | 0.002241891 |
| UTR3            | 21:34001240-34001265     |                 | 0.010552489 |
|                 | 21:34018094;34018703-    |                 |             |
| UTR3            | 34018099;34018715        |                 | 0.009960936 |
| ENST00000507740 | ENSG00000176406 (RIMS2)  | hsa-miR-146a-5p | 0.859322    |
| UTR3            | 8:105264180-105264194    |                 | 0.023223596 |
| UTR3            | 8:105265189-105265214    |                 | 0.003519293 |
| UTR3            | 8:105267240-105267257    |                 | 0.009181043 |
| UTR3            | 8:105267654-105267672    |                 | 0.00435899  |
| ENST00000498619 | ENSG00000036828 (CASR)   | hsa-miR-146a-5p | 0.85922     |
| UTR3            | 3:122004962-122004983    |                 | 0.040269164 |
| ENST00000426923 | ENSG00000145287 (PLAC8)  | hsa-miR-146a-5p | 0.859188    |
| UTR3            | 4:84015597-84015620      |                 | 0.007747126 |
| UTR3            | 4:84015251-84015276      |                 | 0.006203951 |
| UTR3            | 4:84014713-84014741      |                 | 0.026313765 |
| ENST00000381709 | ENSG00000205777 (GAGE1)  | hsa-miR-146a-5p | 0.858677    |
| UTR3            | X:49370654-49370681      |                 | 0.014032276 |
| UTR3            | X:49370800-49370826      |                 | 0.005331823 |
| UTR3            | X:49372209-49372231      |                 | 0.00123034  |
| UTR3            | X:49372609-49372627      |                 | 0.003342216 |
| UTR3            | X:49373100-49373117      |                 | 0.016259258 |

|                 |                          |                 |          |
|-----------------|--------------------------|-----------------|----------|
| ENST00000403263 | ENSG00000114933 (INO80D) | hsa-miR-146a-5p | 0.858554 |
| UTR3            | 2:206868450-206868477    | 0.002723621     |          |
| UTR3            | 2:206867032-206867060    | 0.001898931     |          |
| UTR3            | 2:206865359-206865386    | 0.005096148     |          |
| UTR3            | 2:206862779-206862794    | 0.006577901     |          |
| UTR3            | 2:206862537-206862552    | 0.00272778      |          |
| UTR3            | 2:206860581-206860595    | 0.002359512     |          |
| UTR3            | 2:206860515-206860532    | 0.001097425     |          |
| UTR3            | 2:206859084-206859102    | 0.007240888     |          |
| UTR3            | 2:206859059-206859082    | 0.008054176     |          |
| UTR3            | 2:206869906-206869923    | 0.002519111     |          |
| UTR3            | 2:206869219-206869245    | 0.014605128     |          |
| ENST00000360150 | ENSG00000087502 (ERGIC2) | hsa-miR-146a-5p | 0.858323 |
| UTR3            | 12:29493423-29493438     | 0.00300637      |          |
| UTR3            | 12:29491274-29491296     | 0.029942719     |          |
| UTR3            | 12:29491244-29491252     | 0.002527938     |          |
| UTR3            | 12:29496143-29496168     | 0.030599954     |          |
| ENST00000327381 | ENSG00000206579 (XKR4)   | hsa-miR-146a-5p | 0.858229 |
| UTR3            | 8:56437309-56437333      | 0.004827051     |          |
| UTR3            | 8:56437894-56437914      | 0.008252979     |          |
| UTR3            | 8:56438162-56438178      | 0.002406801     |          |
| UTR3            | 8:56438759-56438784      | 0.003735967     |          |
| UTR3            | 8:56439306-56439331      | 0.002536554     |          |
| UTR3            | 8:56443003-56443027      | 0.001570633     |          |
| UTR3            | 8:56443151-56443167      | 0.00128767      |          |
| UTR3            | 8:56443589-56443612      | 0.001222552     |          |
| UTR3            | 8:56446845-56446872      | 0.001404559     |          |
| UTR3            | 8:56448422-56448445      | 0.005856192     |          |
| UTR3            | 8:56453300-56453318      | 0.001319395     |          |
| UTR3            | 8:56454025-56454043      | 0.005715276     |          |
| ENST00000237654 | ENSG00000118816 (CCNI)   | hsa-miR-146a-5p | 0.857495 |
| UTR3            | 4:77968808-77968836      | 0.040037295     |          |
| ENST00000582913 | ENSG00000154864 (PIEZO2) | hsa-miR-146a-5p | 0.857321 |
| UTR3            | 18:10708407-10708420     | 0.008974848     |          |
| UTR3            | 18:10705538-10705564     | 0.006927301     |          |
| UTR3            | 18:10702038-10702053     | 0.001614812     |          |
| UTR3            | 18:10672793-10672814     | 0.016289845     |          |
| UTR3            | 18:10671702-10671729     | 0.005068118     |          |
| UTR3            | 18:11066151-11066169     | 0.008473069     |          |
| ENST00000608382 | ENSG00000089775 (ZBTB25) | hsa-miR-146a-5p | 0.85709  |
| UTR3            | 14:64953488-64953511     | 0.006535235     |          |
| UTR3            | 14:64949562-64949575     | 0.004256125     |          |
| UTR3            | 14:64949248-64949266     | 0.003800384     |          |
| UTR3            | 14:64946684-64946704     | 0.014141788     |          |
| UTR3            | 14:64945017-64945033     | 0.003027337     |          |
| UTR3            | 14:64944953-64944980     | 0.005328258     |          |

|                 |                            |                 |             |
|-----------------|----------------------------|-----------------|-------------|
| UTR3            | 14:64954592-64954616       |                 | 0.006922593 |
| UTR3            | 14:64953726-64953741       |                 | 0.013172766 |
| ENST00000329255 | ENSG00000052850 (ALX4)     | hsa-miR-146a-5p | 0.856624    |
| UTR3            | 11:44285479-44285500       |                 | 0.003899906 |
| UTR3            | 11:44284629-44284649       |                 | 0.004796028 |
| UTR3            | 11:44284263-44284279       |                 | 0.000922684 |
| UTR3            | 11:44283574-44283592       |                 | 0.004644822 |
| UTR3            | 11:44283035-44283062       |                 | 0.002372694 |
| UTR3            | 11:44282388-44282408       |                 | 0.023284978 |
| ENST00000558084 | ENSG00000055609 (KMT2C)    | hsa-miR-146a-5p | 0.855986    |
| UTR3            | 7:151927048-151927075      |                 | 0.009590812 |
| UTR3            | 7:151884390-151884408      |                 | 0.004203949 |
| UTR3            | 7:151879573-151879597      |                 | 0.005256612 |
| UTR3            | 7:151879336-151879358      |                 | 0.001283183 |
| UTR3            | 7:151879321-151879339      |                 | 0.000576629 |
| UTR3            | 7:151878685-151878706      |                 | 0.002262331 |
| UTR3            | 7:151877896-151877914      |                 | 0.002085102 |
| UTR3            | 7:151874120-151874132      |                 | 0.001367202 |
| UTR3            | 7:151873784-151873810      |                 | 0.008306029 |
| UTR3            | 7:151873584-151873598      |                 | 0.002302111 |
| UTR3            | 7:151859592-151859610      |                 | 0.001111922 |
| UTR3            | 7:151949757-151949776      |                 | 0.010857601 |
| ENST00000312675 | ENSG00000145012 (LPP)      | hsa-miR-146a-5p | 0.855293    |
| UTR3            | 3:188593383-188593404      |                 | 0.002804742 |
| UTR3            | 3:188594207-188594218      |                 | 0.003733323 |
| UTR3            | 3:188594221-188594242      |                 | 0.000919612 |
| UTR3            | 3:188596832-188596858      |                 | 0.003967759 |
| UTR3            | 3:188596919-188596940      |                 | 0.000994604 |
| UTR3            | 3:188597355-188597379      |                 | 0.001212435 |
| UTR3            | 3:188598529-188598544      |                 | 0.006753888 |
| UTR3            | 3:188599764-188599791      |                 | 0.002146874 |
| UTR3            | 3:188600895-188600916      |                 | 0.001646333 |
| UTR3            | 3:188602996-188603008      |                 | 0.001517009 |
| UTR3            | 3:188603150-188603176      |                 | 0.001235532 |
| UTR3            | 3:188603846-188603867      |                 | 0.002549689 |
| UTR3            | 3:188604458-188604471      |                 | 0.001389814 |
| UTR3            | 3:188607180-188607199      |                 | 0.008873021 |
| ENST00000251691 | ENSG00000112379 (KIAA1244) | hsa-miR-146a-5p | 0.855277    |
| UTR3            | 6:138660262-138660290      |                 | 0.001202645 |
| UTR3            | 6:138660789-138660808      |                 | 0.001648708 |
| UTR3            | 6:138661589-138661611      |                 | 0.002178916 |
| UTR3            | 6:138662759-138662782      |                 | 0.019983684 |
| UTR3            | 6:138663259-138663279      |                 | 0.007043601 |
| UTR3            | 6:138655441-138655462      |                 | 0.004525262 |
| UTR3            | 6:138657437-138657462      |                 | 0.040420547 |
| ENST00000304735 | ENSG00000168140 (VASN)     | hsa-miR-146a-5p | 0.854768    |

|                 |                                           |                 |             |
|-----------------|-------------------------------------------|-----------------|-------------|
| UTR3            | 16:4432972-4432987                        |                 | 0.039675431 |
| ENST00000262135 | ENSG00000103494 (RPGRIP1L)                | hsa-miR-146a-5p | 0.854722    |
| UTR3            | 16:53635794-53635812                      |                 | 0.003767088 |
| UTR3            | 16:53635764-53635785                      |                 | 0.024778849 |
| UTR3            | 16:53635742-53635764                      |                 | 0.00679633  |
| UTR3            | 16:53632169-53632177                      |                 | 0.004327081 |
| ENST00000354650 | ENSG00000010810 (FYN)                     | hsa-miR-146a-5p | 0.854505    |
| UTR3            | 6:111982720-111982736                     |                 | 0.006183548 |
| UTR3            | 6:111982115-111982136                     |                 | 0.015504305 |
| UTR3            | 6:111981923-111981941                     |                 | 0.006940798 |
| UTR3            | 6:111981805-111981817                     |                 | 0.011012175 |
| ENST00000281092 | ENSG00000151422 (FER)                     | hsa-miR-146a-5p | 0.854244    |
| UTR3            | 5:108523317-108523343                     |                 | 0.029241723 |
| UTR3            | 5:108524971-108524996                     |                 | 0.007053107 |
| UTR3            | 5:108529174-108529200                     |                 | 0.001690294 |
| UTR3            | 5:108529398-108529413                     |                 | 0.001621417 |
| ENST00000427401 | ENSG00000237440 (ZNF737)                  | hsa-miR-146a-5p | 0.853988    |
| UTR3            | 19:20726641-20726659                      |                 | 0.037738335 |
| UTR3            | 19:20728770;20735281-20728782;20735290    |                 | 0.013054425 |
| ENST00000575022 | ENSG00000177294 (FBXO39)                  | hsa-miR-146a-5p | 0.853434    |
| UTR3            | 17:6699363-6699381                        |                 | 0.039500419 |
| ENST00000373647 | ENSG00000011454 (RABGAP1)                 | hsa-miR-146a-5p | 0.85286     |
| UTR3            | 9:125866641-125866663                     |                 | 0.037623847 |
| UTR3            | 9:125861068;125861757-125861077;125861767 |                 | 0.012764399 |
| ENST00000395792 | ENSG00000081051 (AFP)                     | hsa-miR-146a-5p | 0.852227    |
| UTR3            | 4:74321803-74321819                       |                 | 0.005625655 |
| UTR3            | 4:74321816-74321835                       |                 | 0.031124891 |
| UTR3            | 4:74313186-74313207                       |                 | 0.017779227 |
| ENST00000471923 | ENSG00000048707 (VPS13D)                  | hsa-miR-146a-5p | 0.85221     |
| UTR3            | 1:12569728-12569747                       |                 | 0.001862968 |
| UTR3            | 1:12569867-12569894                       |                 | 0.002365042 |
| UTR3            | 1:12571103-12571128                       |                 | 0.002490058 |
| UTR3            | 1:12571458-12571472                       |                 | 0.005781212 |
| UTR3            | 1:12571963-12571985                       |                 | 0.007038247 |
| UTR3            | 1:12572023-12572043                       |                 | 0.019803514 |
| ENST00000234313 | ENSG00000115956 (PLEK)                    | hsa-miR-146a-5p | 0.851961    |
| UTR3            | 2:68623043-68623065                       |                 | 0.010414537 |
| UTR3            | 2:68623452-68623476                       |                 | 0.006755162 |
| UTR3            | 2:68624040-68624059                       |                 | 0.022139112 |
| ENST00000265022 | ENSG00000058866 (DGKG)                    | hsa-miR-146a-5p | 0.851734    |
| UTR3            | 3:185866658-185866675                     |                 | 0.004387634 |

|                 |                                        |                 |             |
|-----------------|----------------------------------------|-----------------|-------------|
| UTR3            | 3:185866224-185866236                  |                 | 0.001414116 |
| UTR3            | 3:185865478-185865498                  |                 | 0.00315961  |
| UTR3            | 3:185865125-185865151                  |                 | 0.004853848 |
| UTR3            | 3:185865041-185865064                  |                 | 0.025464152 |
| ENST00000539173 | ENSG00000197381 (ADARB1)               | hsa-miR-146a-5p | 0.849589    |
| UTR3            | 21:46642872-46642890                   |                 | 0.002333242 |
| UTR3            | 21:46645579-46645601                   |                 | 0.003688989 |
| UTR3            | 21:46646317-46646332                   |                 | 0.006077283 |
| UTR3            | 21:46646430-46646453                   |                 | 0.025782105 |
| UTR3            | 21:46642075-46642100                   |                 | 0.008025978 |
| ENST00000511739 | ENSG00000170185 (USP38)                | hsa-miR-146a-5p | 0.849336    |
| UTR3            | 4:144127209-144127228                  |                 | 0.010008504 |
| UTR3            | 4:144127235-144127250                  |                 | 0.008174562 |
| UTR3            | 4:144142773-144142800                  |                 | 0.005464425 |
| UTR3            | 4:144143098-144143115                  |                 | 0.002273483 |
| UTR3            | 4:144144834-144144852                  |                 | 0.004017163 |
| UTR3            | 4:144144947-144144963                  |                 | 0.005465667 |
| UTR3            | 4:144109033-144109053                  |                 | 0.02330858  |
| ENST00000467067 | ENSG00000116285 (ERRF1)                | hsa-miR-146a-5p | 0.849148    |
| UTR3            | 1:8075201-8075228                      |                 | 0.004177511 |
| UTR3            | 1:8075105-8075123                      |                 | 0.033655423 |
| UTR3            | 1:8074586-8074599                      |                 | 0.001114113 |
| ENST00000534277 | ENSG00000197302 (ZNF720)               | hsa-miR-146a-5p | 0.848927    |
| UTR3            | 16:31734665;31765087-31734674;31765099 |                 | 0.004201446 |
| UTR3            | 16:31767381-31767397                   |                 | 0.001813278 |
| UTR3            | 16:31767890-31767908                   |                 | 0.002574628 |
| UTR3            | 16:31768248-31768272                   |                 | 0.016389561 |
| UTR3            | 16:31768453-31768467                   |                 | 0.013939956 |
| ENST00000455584 | ENSG00000251537 (RP11-385D13.1)        | hsa-miR-146a-5p | 0.84846     |
| UTR3            | 17:15477218-15477243                   |                 | 0.026225729 |
| UTR3            | 17:15476104-15476131                   |                 | 0.004125517 |
| UTR3            | 17:15476009-15476026                   |                 | 0.006134479 |
| UTR3            | 17:15475686-15475712                   |                 | 0.00237367  |
| ENST00000456874 | ENSG00000197057 (DTHD1)                | hsa-miR-146a-5p | 0.84823     |
| UTR3            | 4:36345830-36345857                    |                 | 0.038830154 |
| ENST00000267884 | ENSG00000140319 (SRP14)                | hsa-miR-146a-5p | 0.848011    |
| UTR3            | 15:40328018-40328038                   |                 | 0.038802385 |
| ENST00000375826 | ENSG00000116771 (AGMAT)                | hsa-miR-146a-5p | 0.847798    |
| UTR3            | 1:15900097-15900113                    |                 | 0.03600743  |
| UTR3            | 1:15899986-15900012                    |                 | 0.002767977 |
| ENST00000299563 | ENSG00000166439 (RNF169)               | hsa-miR-146a-5p | 0.847721    |
| UTR3            | 11:74547827-74547850                   |                 | 0.026333335 |
| UTR3            | 11:74548436-74548462                   |                 | 0.004790655 |
| UTR3            | 11:74549318-74549338                   |                 | 0.004002639 |



|                 |                          |                 |             |
|-----------------|--------------------------|-----------------|-------------|
| UTR3            | 11:74549335-74549354     |                 | 0.000620631 |
| UTR3            | 11:74549641-74549662     |                 | 0.000974438 |
| UTR3            | 11:74552304-74552321     |                 | 0.002043926 |
| ENST00000409652 | ENSG00000221963 (APOL6)  | hsa-miR-146a-5p | 0.847715    |
| UTR3            | 22:36056750-36056778     |                 | 0.003688126 |
| UTR3            | 22:36058236-36058262     |                 | 0.001756655 |
| UTR3            | 22:36059578-36059592     |                 | 0.001418743 |
| UTR3            | 22:36063553-36063573     |                 | 0.026409593 |
| UTR3            | 22:36064356-36064382     |                 | 0.005491812 |
| ENST00000295887 | ENSG00000163624 (CDS1)   | hsa-miR-146a-5p | 0.847488    |
| UTR3            | 4:85570261-85570284      |                 | 0.011905614 |
| UTR3            | 4:85571856-85571881      |                 | 0.002929674 |
| UTR3            | 4:85572409-85572436      |                 | 0.023900967 |
| ENST00000606080 | ENSG00000111816 (FRK)    | hsa-miR-146a-5p | 0.847303    |
| UTR3            | 6:116262456-116262469    |                 | 0.006705798 |
| UTR3            | 6:116260958-116260977    |                 | 0.005016461 |
| UTR3            | 6:116259440-116259467    |                 | 0.006203776 |
| UTR3            | 6:116259000-116259025    |                 | 0.005979556 |
| UTR3            | 6:116258134-116258160    |                 | 0.001423959 |
| UTR3            | 6:116258081-116258099    |                 | 0.000555513 |
| UTR3            | 6:116257824-116257838    |                 | 0.010319329 |
| UTR3            | 6:116255874-116255899    |                 | 0.001457713 |
| UTR3            | 6:116255617-116255641    |                 | 0.001050755 |
| ENST00000262352 | ENSG00000106688 (SLC1A1) | hsa-miR-146a-5p | 0.846919    |
| UTR3            | 9:4585858-4585886        |                 | 0.006274354 |
| UTR3            | 9:4586281-4586307        |                 | 0.007769795 |
| UTR3            | 9:4586943-4586962        |                 | 0.024620229 |
| ENST00000546136 | ENSG00000134532 (SOX5)   | hsa-miR-146a-5p | 0.846556    |
| UTR3            | 12:23687064-23687092     |                 | 0.009914959 |
| UTR3            | 12:23686797-23686820     |                 | 0.011804644 |
| UTR3            | 12:23686264-23686288     |                 | 0.012213074 |
| UTR3            | 12:23684525-23684535     |                 | 0.002665041 |
| UTR3            | 12:23684136-23684153     |                 | 0.002020973 |
| ENST00000253144 | ENSG00000130844 (ZNF331) | hsa-miR-146a-5p | 0.846392    |
| UTR3            | 19:54081623-54081636     |                 | 0.038598057 |
| ENST00000296402 | ENSG00000145349 (CAMK2D) | hsa-miR-146a-5p | 0.845834    |
| UTR3            | 4:114375632-114375658    |                 | 0.017801652 |
| UTR3            | 4:114375331-114375351    |                 | 0.0055279   |
| UTR3            | 4:114374954-114374976    |                 | 0.003114999 |
| UTR3            | 4:114374282-114374305    |                 | 0.002711897 |
| UTR3            | 4:114374242-114374260    |                 | 0.000743129 |
| UTR3            | 4:114373718-114373743    |                 | 0.003302019 |
| UTR3            | 4:114373425-114373444    |                 | 0.002634639 |
| UTR3            | 4:114372718-114372743    |                 | 0.00269178  |
| ENST00000538183 | ENSG00000112096 (SOD2)   | hsa-miR-146a-5p | 0.8458      |
| UTR3            | 6:160099466-160099490    |                 | 0.000775212 |

|                 |                                            |                 |             |
|-----------------|--------------------------------------------|-----------------|-------------|
| UTR3            | 6:160098820-160098845                      |                 | 0.001941728 |
| UTR3            | 6:160098324-160098339                      |                 | 0.001623366 |
| UTR3            | 6:160097579-160097598                      |                 | 0.003379259 |
| UTR3            | 6:160096095-160096114                      |                 | 0.004689574 |
| UTR3            | 6:160095330-160095354                      |                 | 0.007054545 |
| UTR3            | 6:160094581-160094608                      |                 | 0.001825159 |
| UTR3            | 6:160093269-160093295                      |                 | 0.001103695 |
| UTR3            | 6:160093216-160093240                      |                 | 0.001753146 |
| UTR3            | 6:160093054-160093072                      |                 | 0.001302045 |
| UTR3            | 6:160092958-160092985                      |                 | 0.004520262 |
| UTR3            | 6:160092306-160092333                      |                 | 0.001755003 |
| UTR3            | 6:160091513-160091532                      |                 | 0.006800766 |
| ENST00000358691 | ENSG00000198265 (HELZ)                     | hsa-miR-146a-5p | 0.845011    |
| UTR3            | 17:65074246-65074262                       |                 | 0.024570002 |
| UTR3            | 17:65073502-65073528                       |                 | 0.003478352 |
| UTR3            | 17:65071922-65071950                       |                 | 0.001388923 |
| UTR3            | 17:65069146-65069169                       |                 | 0.008987742 |
| ENST00000342771 | ENSG00000158321 (AUTS2)                    | hsa-miR-146a-5p | 0.844949    |
| UTR3            | 7:70256179-70256198                        |                 | 0.015883036 |
| UTR3            | 7:70257043-70257071                        |                 | 0.003169963 |
| UTR3            | 7:70257779-70257797                        |                 | 0.019364331 |
| ENST00000525284 | ENSG00000154237 (LRRK1)                    | hsa-miR-146a-5p | 0.844906    |
| UTR3            | 15:101589908-101589933                     |                 | 0.001703729 |
| UTR3            | 15:101595419;101597061-101595428;101597074 |                 | 0.00405716  |
| UTR3            | 15:101598266-101598293                     |                 | 0.001593201 |
| UTR3            | 15:101609118-101609136                     |                 | 0.011966078 |
| UTR3            | 15:101609141-101609165                     |                 | 0.005550374 |
| UTR3            | 15:101609207-101609231                     |                 | 0.004275327 |
| UTR3            | 15:101609220-101609239                     |                 | 0.003078149 |
| UTR3            | 15:101609237-101609254                     |                 | 0.006187941 |
| ENST00000334567 | ENSG00000186329 (TMEM212)                  | hsa-miR-146a-5p | 0.843873    |
| UTR3            | 3:171576846-171576867                      |                 | 0.03828342  |
| ENST00000508624 | ENSG00000134982 (APC)                      | hsa-miR-146a-5p | 0.843444    |
| UTR3            | 5:112173799-112173825                      |                 | 0.007332636 |
| UTR3            | 5:112176690-112176709                      |                 | 0.00195377  |
| UTR3            | 5:112176869-112176884                      |                 | 0.008399541 |
| UTR3            | 5:112177166-112177185                      |                 | 0.001772431 |
| UTR3            | 5:112177182-112177205                      |                 | 0.002023995 |
| UTR3            | 5:112177354-112177370                      |                 | 0.00982467  |
| UTR3            | 5:112177354-112177379                      |                 | 0.006923252 |
| ENST00000328902 | ENSG00000133561 (GIMAP6)                   | hsa-miR-146a-5p | 0.842574    |
| UTR3            | 7:150324368-150324391                      |                 | 0.003872322 |
| UTR3            | 7:150323014-150323031                      |                 | 0.029907014 |
| UTR3            | 7:150322849-150322863                      |                 | 0.004343574 |

|                 |                            |                 |          |
|-----------------|----------------------------|-----------------|----------|
| ENST00000339570 | ENSG00000073060 (SCARB1)   | hsa-miR-146a-5p | 0.842316 |
| UTR3            | 12:125261732-125261759     | 0.038091023     |          |
| ENST00000465065 | ENSG00000163728 (TTC14)    | hsa-miR-146a-5p | 0.841991 |
| UTR3            | 3:180321980-180322006      | 0.002884282     |          |
| UTR3            | 3:180322022-180322044      | 0.002079273     |          |
| UTR3            | 3:180322235-180322248      | 0.010446992     |          |
| UTR3            | 3:180323806-180323827      | 0.001237929     |          |
| UTR3            | 3:180325907-180325927      | 0.003185602     |          |
| UTR3            | 3:180326870-180326889      | 0.004852231     |          |
| UTR3            | 3:180327113-180327137      | 0.006404825     |          |
| UTR3            | 3:180328453-180328480      | 0.006960046     |          |
| ENST00000261942 | ENSG00000113194 (FAF2)     | hsa-miR-146a-5p | 0.841295 |
| UTR3            | 5:175934289-175934302      | 0.035455277     |          |
| UTR3            | 5:175935765-175935777      | 0.002510449     |          |
| ENST00000568578 | ENSG00000147274 (RBMX)     | hsa-miR-146a-5p | 0.840722 |
| UTR3            | X:135957513-135957525      | 0.018341125     |          |
| UTR3            | X:135955832-135955856      | 0.006373582     |          |
| UTR3            | X:135951946-135951967      | 0.013181008     |          |
| ENST00000344419 | ENSG00000009765 (IYD)      | hsa-miR-146a-5p | 0.840546 |
| UTR3            | 6:150719472-150719499      | 0.002494505     |          |
| UTR3            | 6:150719760-150719781      | 0.002129818     |          |
| UTR3            | 6:150720652-150720678      | 0.001321462     |          |
| UTR3            | 6:150721442-150721454      | 0.003702191     |          |
| UTR3            | 6:150722219-150722246      | 0.015194171     |          |
| UTR3            | 6:150722726-150722746      | 0.001218708     |          |
| UTR3            | 6:150726039-150726061      | 0.002907563     |          |
| UTR3            | 6:150726283-150726308      | 0.00210062      |          |
| UTR3            | 6:150726852-150726864      | 0.006805258     |          |
| ENST00000371172 | ENSG00000197430 (OPALIN)   | hsa-miR-146a-5p | 0.840493 |
| UTR3            | 10:98105377-98105404       | 0.004978911     |          |
| UTR3            | 10:98105350-98105362       | 0.004954325     |          |
| UTR3            | 10:98104953-98104973       | 0.008603823     |          |
| UTR3            | 10:98103604-98103625       | 0.003048014     |          |
| UTR3            | 10:98103243-98103270       | 0.016282728     |          |
| ENST00000275072 | ENSG00000146281 (PM20D2)   | hsa-miR-146a-5p | 0.840122 |
| UTR3            | 6:89872421-89872437        | 0.004037484     |          |
| UTR3            | 6:89873535-89873559        | 0.002048324     |          |
| UTR3            | 6:89874694-89874719        | 0.031736765     |          |
| ENST00000394650 | ENSG00000005059 (CCDC109B) | hsa-miR-146a-5p | 0.840103 |
| UTR3            | 4:110608874-110608891      | 0.037820311     |          |
| ENST00000422265 | ENSG00000144648 (ACKR2)    | hsa-miR-146a-5p | 0.840072 |
| UTR3            | 3:42907248-42907267        | 0.016600797     |          |
| UTR3            | 3:42907248-42907274        | 0.02121579      |          |

|                 |                                           |                 |          |
|-----------------|-------------------------------------------|-----------------|----------|
| ENST00000441535 | ENSG00000094963 (FMO2)                    | hsa-miR-146a-5p | 0.840012 |
| UTR3            | 1:171178182-171178209                     | 0.003128683     |          |
| UTR3            | 1:171178704-171178728                     | 0.03112554      |          |
| UTR3            | 1:171179000-171179018                     | 0.003555032     |          |
| ENST00000513291 | ENSG00000175054 (ATR)                     | hsa-miR-146a-5p | 0.839732 |
| UTR3            | 3:142171825-142171843                     | 0.014008067     |          |
| UTR3            | 3:142171424-142171444                     | 0.00803428      |          |
| UTR3            | 3:142170362-142170388                     | 0.001509749     |          |
| UTR3            | 3:142168162-142168179                     | 0.014223052     |          |
| ENST00000381052 | ENSG00000049192 (ADAMTS6)                 | hsa-miR-146a-5p | 0.839592 |
| UTR3            | 5:64747971-64747990                       | 0.025700259     |          |
| UTR3            | 5:64445769-64445784                       | 0.00801707      |          |
| UTR3            | 5:64769406-64769431                       | 0.024930067     |          |
| ENST00000216513 | ENSG00000100625 (SIX4)                    | hsa-miR-146a-5p | 0.839419 |
| UTR3            | 14:61178171-61178187                      | 0.003641602     |          |
| UTR3            | 14:61176592-61176617                      | 0.034095666     |          |
| ENST00000356264 | ENSG00000078053 (AMPH)                    | hsa-miR-146a-5p | 0.837819 |
| UTR3            | 7:38423942-38423961                       | 0.037543996     |          |
| ENST00000381779 | ENSG00000179542 (SLITRK4)                 | hsa-miR-146a-5p | 0.837783 |
| UTR3            | X:142715602-142715621                     | 0.017982249     |          |
| UTR3            | X:142713810-142713833                     | 0.001455954     |          |
| UTR3            | X:142710726-142710745                     | 0.007862679     |          |
| UTR3            | X:142718444-142718467                     | 0.052110743     |          |
| ENST00000368744 | ENSG00000203783 (PRR9)                    | hsa-miR-146a-5p | 0.837478 |
| UTR3            | 1:153191155-153191181                     | 0.014985065     |          |
| UTR3            | 1:153191639-153191662                     | 0.018732695     |          |
| UTR3            | 1:153191701-153191721                     | 0.003785258     |          |
| ENST00000256637 | ENSG00000134243 (SORT1)                   | hsa-miR-146a-5p | 0.837432 |
| UTR3            | 1:109855549-109855565                     | 0.001901908     |          |
| UTR3            | 1:109855082-109855100                     | 0.002694417     |          |
| UTR3            | 1:109853469-109853486                     | 0.005133756     |          |
| UTR3            | 1:109852714-109852737                     | 0.025783105     |          |
| UTR3            | 1:109867706;109869614-109867711;109869627 | 0.013015178     |          |
| ENST00000254958 | ENSG00000101384 (JAG1)                    | hsa-miR-146a-5p | 0.837387 |
| UTR3            | 20:10619390-10619418                      | 0.002829436     |          |
| UTR3            | 20:10618453-10618471                      | 0.034662667     |          |
| ENST00000366857 | ENSG00000143771 (CNIH4)                   | hsa-miR-146a-5p | 0.836519 |
| UTR3            | 1:224563703-224563723                     | 0.030424477     |          |
| UTR3            | 1:224565497-224565519                     | 0.002221402     |          |
| UTR3            | 1:224566128-224566144                     | 0.001923766     |          |
| UTR3            | 1:224566620-224566633                     | 0.002818462     |          |
| ENST00000322434 | ENSG00000178338 (ZNF354B)                 | hsa-miR-146a-5p | 0.836402 |
| UTR3            | 5:178311356-178311378                     | 0.037374193     |          |

|                 |                          |                 |          |
|-----------------|--------------------------|-----------------|----------|
| ENST00000396578 | ENSG00000169031 (COL4A3) | hsa-miR-146a-5p | 0.835188 |
| UTR3            | 2:228176775-228176798    | 0.008615809     |          |
| UTR3            | 2:228177550-228177570    | 0.002474424     |          |
| UTR3            | 2:228178535-228178560    | 0.01832064      |          |
| UTR3            | 2:228178913-228178933    | 0.002409671     |          |
| UTR3            | 2:228179180-228179207    | 0.005409072     |          |
| ENST00000609129 | ENSG00000273274 (ZBTB8B) | hsa-miR-146a-5p | 0.835146 |
| UTR3            | 1:32952808-32952833      | 0.003281662     |          |
| UTR3            | 1:32954102-32954125      | 0.001266589     |          |
| UTR3            | 1:32955354-32955381      | 0.001161934     |          |
| UTR3            | 1:32956005-32956024      | 0.003194311     |          |
| UTR3            | 1:32957329-32957351      | 0.009143861     |          |
| UTR3            | 1:32957464-32957482      | 0.00175395      |          |
| UTR3            | 1:32958608-32958626      | 0.001454578     |          |
| UTR3            | 1:32959900-32959927      | 0.005876584     |          |
| UTR3            | 1:32960489-32960510      | 0.005908212     |          |
| UTR3            | 1:32961561-32961588      | 0.004182919     |          |
| ENST00000409198 | ENSG00000183091 (NEB)    | hsa-miR-146a-5p | 0.834599 |
| UTR3            | 2:152342184-152342205    | 0.03551503      |          |
| UTR3            | 2:152507242-152507259    | 0.006088684     |          |
| UTR3            | 2:152466477-152466501    | 0.004700124     |          |
| ENST00000471389 | ENSG00000140718 (FTO)    | hsa-miR-146a-5p | 0.834394 |
| UTR3            | 16:54146464-54146479     | 0.002579032     |          |
| UTR3            | 16:54148438-54148460     | 0.02908429      |          |
| UTR3            | 16:54150629-54150652     | 0.001112845     |          |
| UTR3            | 16:54150700-54150718     | 0.000842553     |          |
| UTR3            | 16:54151038-54151063     | 0.00106127      |          |
| UTR3            | 16:54153520-54153546     | 0.00245555      |          |
| ENST00000361987 | ENSG00000242689 (CNTF)   | hsa-miR-146a-5p | 0.833886 |
| UTR3            | 11:58392956-58392973     | 0.037075474     |          |
| ENST00000398653 | ENSG00000115970 (THADA)  | hsa-miR-146a-5p | 0.833749 |
| UTR3            | 2:43798857-43798884      | 0.002124442     |          |
| UTR3            | 2:43797621-43797638      | 0.014859856     |          |
| UTR3            | 2:43520084-43520105      | 0.003049931     |          |
| UTR3            | 2:43458152-43458164      | 0.017025107     |          |
| ENST00000404138 | ENSG00000184677 (ZBTB40) | hsa-miR-146a-5p | 0.832945 |
| UTR3            | 1:22853029-22853054      | 0.025498974     |          |
| UTR3            | 1:22855007-22855025      | 0.001321592     |          |
| UTR3            | 1:22855250-22855273      | 0.002183428     |          |
| UTR3            | 1:22855474-22855492      | 0.004707455     |          |
| UTR3            | 1:22848053-22848072      | 0.020067452     |          |
| ENST00000371322 | ENSG00000158290 (CUL4B)  | hsa-miR-146a-5p | 0.832538 |
| UTR3            | X:119660468-119660482    | 0.003371082     |          |
| UTR3            | X:119659422-119659439    | 0.009816474     |          |
| UTR3            | X:119659068-119659094    | 0.021252098     |          |
| UTR3            | X:119658934-119658948    | 0.002477323     |          |

|                 |                           |                 |          |
|-----------------|---------------------------|-----------------|----------|
| ENST00000399639 | ENSG00000143469 (SYT14)   | hsa-miR-146a-5p | 0.8325   |
| UTR3            | 1:210334832-210334849     | 0.010441792     |          |
| UTR3            | 1:210335377-210335399     | 0.003721008     |          |
| UTR3            | 1:210335439-210335460     | 0.010259535     |          |
| UTR3            | 1:210335887-210335904     | 0.002193639     |          |
| UTR3            | 1:210336966-210336990     | 0.003196109     |          |
| UTR3            | 1:210337559-210337586     | 0.00710043      |          |
| ENST00000375290 | ENSG00000185920 (PTCH1)   | hsa-miR-146a-5p | 0.832437 |
| UTR3            | 9:98231136-98231155       | 0.017736586     |          |
| UTR3            | 9:98214374-98214402       | 0.001167429     |          |
| UTR3            | 9:98214245-98214265       | 0.000497656     |          |
| UTR3            | 9:98212176-98212193       | 0.006424267     |          |
| UTR3            | 9:98209498-98209520       | 0.002536672     |          |
| UTR3            | 9:98207147-98207164       | 0.00185277      |          |
| UTR3            | 9:98205798-98205823       | 0.006689733     |          |
| ENST00000416913 | ENSG00000162869 (PPP1R21) | hsa-miR-146a-5p | 0.83189  |
| UTR3            | 2:48685269-48685287       | 0.005811932     |          |
|                 | 2:48692766;48698226-      |                 |          |
| UTR3            | 48692781;48698231         | 0.029010169     |          |
| UTR3            | 2:48722859-48722875       | 0.002018985     |          |
| ENST00000371065 | ENSG00000213625 (LEPROT)  | hsa-miR-146a-5p | 0.831087 |
| UTR3            | 1:65897745-65897773       | 0.003434168     |          |
| UTR3            | 1:65898333-65898353       | 0.005562506     |          |
| UTR3            | 1:65898476-65898503       | 0.009633874     |          |
| UTR3            | 1:65900524-65900540       | 0.008562254     |          |
| UTR3            | 1:65900710-65900725       | 0.002134515     |          |
| UTR3            | 1:65900988-65901006       | 0.007420103     |          |
| ENST00000354200 | ENSG00000125875 (TBC1D20) | hsa-miR-146a-5p | 0.83055  |
| UTR3            | 20:418405-418429          | 0.036684987     |          |
| ENST00000393203 | ENSG00000134247 (PTGFRN)  | hsa-miR-146a-5p | 0.830271 |
| UTR3            | 1:117532705-117532727     | 0.028240992     |          |
| UTR3            | 1:117532729-117532751     | 0.006108076     |          |
| UTR3            | 1:117509634-117509652     | 0.014515316     |          |
| ENST00000361902 | ENSG00000198704 (GPX6)    | hsa-miR-146a-5p | 0.830223 |
| UTR3            | 6:28471504-28471518       | 0.028787543     |          |
| UTR3            | 6:28471117-28471144       | 0.007859475     |          |
| ENST00000373075 | ENSG00000163875 (MEAF6)   | hsa-miR-146a-5p | 0.829713 |
| UTR3            | 1:37959349-37959368       | 0.005170844     |          |
| UTR3            | 1:37958906-37958925       | 0.003563336     |          |
| UTR3            | 1:37958199-37958225       | 0.027853774     |          |
| ENST00000536441 | ENSG00000149212 (SESN3)   | hsa-miR-146a-5p | 0.829673 |
| UTR3            | 11:94906319-94906339      | 0.023541325     |          |
| UTR3            | 11:94905500-94905518      | 0.003963915     |          |
| UTR3            | 11:94904191-94904206      | 0.002627982     |          |

|                 |                            |                 |             |
|-----------------|----------------------------|-----------------|-------------|
| UTR3            | 11:94903446-94903473       |                 | 0.002153479 |
| UTR3            | 11:94900125-94900151       |                 | 0.002596264 |
| UTR3            | 11:94899920-94899940       |                 | 0.001700323 |
| ENST00000272748 | ENSG00000144320 (KIAA1715) | hsa-miR-146a-5p | 0.829255    |
| UTR3            | 2:176794330-176794353      |                 | 0.01659684  |
| UTR3            | 2:176794156-176794183      |                 | 0.004109183 |
| UTR3            | 2:176794093-176794116      |                 | 0.002807133 |
| UTR3            | 2:176792260-176792286      |                 | 0.003710581 |
| UTR3            | 2:176791459-176791485      |                 | 0.002543192 |
| UTR3            | 2:176790159-176790178      |                 | 0.001148933 |
| UTR3            | 2:176789976-176789998      |                 | 0.001554077 |
| UTR3            | 2:176857057-176857078      |                 | 0.024086454 |
| ENST00000368494 | ENSG00000153989 (NUS1)     | hsa-miR-146a-5p | 0.828745    |
| UTR3            | 6:118029369-118029377      |                 | 0.00355471  |
| UTR3            | 6:118030557-118030573      |                 | 0.012090992 |
| UTR3            | 6:118031091-118031114      |                 | 0.003872541 |
| UTR3            | 6:118031534-118031553      |                 | 0.016958035 |
| ENST00000371818 | ENSG00000119917 (IFIT3)    | hsa-miR-146a-5p | 0.827671    |
| UTR3            | 10:91100339-91100352       |                 | 0.003730126 |
| UTR3            | 10:91100427-91100453       |                 | 0.029930356 |
| UTR3            | 10:91098969-91098987       |                 | 0.016579866 |
| ENST00000244763 | ENSG00000124783 (SSR1)     | hsa-miR-146a-5p | 0.827525    |
| UTR3            | 6:7287053-7287076          |                 | 0.002921925 |
| UTR3            | 6:7284462-7284474          |                 | 0.001292585 |
| UTR3            | 6:7283037-7283052          |                 | 0.001953488 |
| UTR3            | 6:7282522-7282547          |                 | 0.0022037   |
| UTR3            | 6:7282364-7282382          |                 | 0.001882027 |
| UTR3            | 6:7282157-7282177          |                 | 0.009482739 |
| UTR3            | 6:7281850-7281877          |                 | 0.016599654 |
| ENST00000397609 | ENSG00000171262 (FAM98B)   | hsa-miR-146a-5p | 0.827366    |
| UTR3            | 15:38777873-38777900       |                 | 0.023209398 |
| UTR3            | 15:38779177-38779188       |                 | 0.013108531 |
| ENST00000566400 | ENSG00000140463 (BBS4)     | hsa-miR-146a-5p | 0.827336    |
|                 | 15:73016988;73020281-      |                 |             |
| UTR3            | 73016996;73020287          |                 | 0.033244536 |
| UTR3            | 15:73023995-73024013       |                 | 0.00307001  |
| ENST00000514770 | ENSG00000138658 (C4orf21)  | hsa-miR-146a-5p | 0.827262    |
| UTR3            | 4:113539835-113539857      |                 | 0.01613986  |
| UTR3            | 4:113533684-113533705      |                 | 0.007832682 |
| UTR3            | 4:113531935-113531956      |                 | 0.012333472 |
| ENST00000375360 | ENSG00000158079 (PTPDC1)   | hsa-miR-146a-5p | 0.827255    |
| UTR3            | 9:96870303-96870321        |                 | 0.005261173 |
| UTR3            | 9:96870935-96870960        |                 | 0.01623888  |

|                 |                          |                 |             |
|-----------------|--------------------------|-----------------|-------------|
| UTR3            | 9:96871885-96871908      |                 | 0.014805162 |
| ENST00000410015 | ENSG00000115919 (KYNU)   | hsa-miR-146a-5p | 0.826924    |
| UTR3            | 2:143704771-143704796    |                 | 0.036267436 |
| ENST00000428210 | ENSG00000082898 (XPO1)   | hsa-miR-146a-5p | 0.826839    |
|                 | 2:61726030;61726848-     |                 |             |
| UTR3            | 61726048;61726852        |                 | 0.001918986 |
|                 | 2:61725917;61726000-     |                 |             |
| UTR3            | 61725927;61726015        |                 | 0.001224756 |
| UTR3            | 2:61720853-61720880      |                 | 0.001146475 |
| UTR3            | 2:61713055-61713077      |                 | 0.03196745  |
| ENST00000554659 | ENSG00000100568 (VTI1B)  | hsa-miR-146a-5p | 0.826065    |
| UTR3            | 14:68117742-68117764     |                 | 0.020694763 |
| UTR3            | 14:68117627-68117654     |                 | 0.004576677 |
| UTR3            | 14:68116718-68116737     |                 | 0.003443384 |
| UTR3            | 14:68115814-68115828     |                 | 0.001617218 |
| UTR3            | 14:68115652-68115672     |                 | 0.001449771 |
| UTR3            | 14:68123224-68123246     |                 | 0.02544167  |
| ENST00000299333 | ENSG00000166257 (SCN3B)  | hsa-miR-146a-5p | 0.825592    |
| UTR3            | 11:123503950-123503967   |                 | 0.003993802 |
| UTR3            | 11:123501813-123501825   |                 | 0.001951447 |
| UTR3            | 11:123501604-123501622   |                 | 0.009463242 |
| UTR3            | 11:123501519-123501545   |                 | 0.001155742 |
| UTR3            | 11:123501418-123501432   |                 | 0.00129164  |
| UTR3            | 11:123501183-123501210   |                 | 0.016106078 |
| UTR3            | 11:123500912-123500928   |                 | 0.002153856 |
| ENST00000326524 | ENSG00000168621 (GDNF)   | hsa-miR-146a-5p | 0.825522    |
| UTR3            | 5:37812845-37812857      |                 | 0.036107832 |
| ENST00000354833 | ENSG00000172058 (SERF1A) | hsa-miR-146a-5p | 0.824887    |
| UTR3            | 5:70213256-70213276      |                 | 0.020300214 |
| UTR3            | 5:70213949-70213967      |                 | 0.009536279 |
| UTR3            | 5:70214062-70214088      |                 | 0.006199432 |
| ENST00000408907 | ENSG00000222028 (PSMB11) | hsa-miR-146a-5p | 0.824791    |
| UTR3            | 14:23512897-23512919     |                 | 0.036025031 |
| ENST00000512733 | ENSG00000163291 (PAQR3)  | hsa-miR-146a-5p | 0.824329    |
| UTR3            | 4:79841040-79841055      |                 | 0.002823661 |
| UTR3            | 4:79839865-79839892      |                 | 0.002647571 |
| UTR3            | 4:79836873-79836898      |                 | 0.001506855 |
| UTR3            | 4:79836741-79836766      |                 | 0.023543436 |
| UTR3            | 4:79836710-79836725      |                 | 0.000692242 |
| UTR3            | 4:79835729-79835749      |                 | 0.001892191 |
| UTR3            | 4:79835720-79835748      |                 | 0.000547132 |
| UTR3            | 4:79833500-79833522      |                 | 0.002319718 |
| ENST00000283943 | ENSG00000153827 (TRIP12) | hsa-miR-146a-5p | 0.823965    |
| UTR3            | 2:230631707-230631721    |                 | 0.027311756 |
| UTR3            | 2:230631667-230631694    |                 | 0.002080421 |
| UTR3            | 2:230631157-230631184    |                 | 0.004783985 |



|                 |                          |                 |             |
|-----------------|--------------------------|-----------------|-------------|
| UTR3            | 2:230629631-230629652    |                 | 0.001755559 |
| ENST00000415083 | ENSG00000141380 (SS18)   | hsa-miR-146a-5p | 0.823843    |
| UTR3            | 18:23597711-23597728     |                 | 0.007961416 |
| UTR3            | 18:23596819-23596838     |                 | 0.017233809 |
| UTR3            | 18:23596595-23596614     |                 | 0.009695367 |
|                 | 18:23658125;23667465-    |                 |             |
| UTR3            | 23658124;23667482        |                 | 0.006594678 |
| ENST00000435820 | ENSG00000197134 (ZNF257) | hsa-miR-146a-5p | 0.823556    |
|                 | 19:22256358;22270779-    |                 |             |
| UTR3            | 22256366;22270791        |                 | 0.013190719 |
| UTR3            | 19:22272041-22272063     |                 | 0.001510305 |
| UTR3            | 19:22272447-22272465     |                 | 0.010085155 |
| UTR3            | 19:22272529-22272546     |                 | 0.011099574 |
| ENST00000609686 | ENSG00000273079 (GRIN2B) | hsa-miR-146a-5p | 0.823203    |
| UTR3            | 12:13715512-13715531     |                 | 0.011999721 |
| UTR3            | 12:13713300-13713317     |                 | 0.003206195 |
| UTR3            | 12:13709899-13709920     |                 | 0.001399555 |
| UTR3            | 12:13708931-13708952     |                 | 0.001571386 |
| UTR3            | 12:13708338-13708349     |                 | 0.001919985 |
| UTR3            | 12:13708121-13708144     |                 | 0.002978573 |
| UTR3            | 12:13706412-13706433     |                 | 0.001546158 |
| UTR3            | 12:13704166-13704191     |                 | 0.003082128 |
| UTR3            | 12:13704119-13704140     |                 | 0.000517781 |
| UTR3            | 12:13704071-13704098     |                 | 0.000619487 |
| UTR3            | 12:13703843-13703863     |                 | 0.002394843 |
| UTR3            | 12:13699983-13699997     |                 | 0.001549966 |
| UTR3            | 12:13699762-13699782     |                 | 0.001802554 |
| UTR3            | 12:14019057-14019084     |                 | 0.007989697 |
|                 | ENSG00000214753          |                 |             |
| ENST00000301785 | (HNRNPUL2)               | hsa-miR-146a-5p | 0.822912    |
| UTR3            | 11:62481185-62481202     |                 | 0.005537309 |
| UTR3            | 11:62480176-62480186     |                 | 0.030276082 |
|                 | ENSG00000160218          |                 |             |
| ENST00000422875 | (TRAPPC10)               | hsa-miR-146a-5p | 0.822303    |
| UTR3            | 21:45483541-45483563     |                 | 0.00704606  |
| UTR3            | 21:45507670-45507689     |                 | 0.003957201 |
| UTR3            | 21:45523589-45523617     |                 | 0.00153099  |
| UTR3            | 21:45524594-45524610     |                 | 0.023210879 |
| ENST00000296575 | ENSG00000164161 (HHIP)   | hsa-miR-146a-5p | 0.822149    |
| UTR3            | 4:145661578-145661594    |                 | 0.001785952 |
| UTR3            | 4:145663299-145663319    |                 | 0.006387757 |
| UTR3            | 4:145663402-145663428    |                 | 0.001360881 |
| UTR3            | 4:145664352-145664379    |                 | 0.00156666  |
| UTR3            | 4:145664660-145664678    |                 | 0.001574764 |
| UTR3            | 4:145665792-145665818    |                 | 0.023051938 |
| ENST00000262096 | ENSG00000104219 (ZDHHC2) | hsa-miR-146a-5p | 0.822061    |

|                 |                           |                 |             |
|-----------------|---------------------------|-----------------|-------------|
| UTR3            | 8:17077852-17077874       |                 | 0.014421892 |
| UTR3            | 8:17081112-17081128       |                 | 0.00216024  |
| UTR3            | 8:17082167-17082185       |                 | 0.015787039 |
| UTR3            | 8:17082184-17082202       |                 | 0.003348923 |
| ENST00000282869 | ENSG00000152926 (ZNF117)  | hsa-miR-146a-5p | 0.821796    |
| UTR3            | 7:64438155-64438180       |                 | 0.026706056 |
| UTR3            | 7:64437483-64437508       |                 | 0.008982432 |
| ENST00000556250 | ENSG00000187790 (FANCM)   | hsa-miR-146a-5p | 0.821615    |
| UTR3            | 14:45669896-45669922      |                 | 0.021497994 |
| UTR3            | 14:45669959-45669972      |                 | 0.014170353 |
| ENST00000389534 | ENSG00000197608 (ZNF841)  | hsa-miR-146a-5p | 0.821024    |
| UTR3            | 19:52568231-52568250      |                 | 0.00496667  |
| UTR3            | 19:52568182-52568199      |                 | 0.030635808 |
| ENST00000369466 | ENSG00000116830 (TTF2)    | hsa-miR-146a-5p | 0.82009     |
| UTR3            | 1:117644959-117644977     |                 | 0.005284154 |
| UTR3            | 1:117645967-117645995     |                 | 0.001803199 |
| UTR3            | 1:117647168-117647190     |                 | 0.001390362 |
| UTR3            | 1:117650049-117650074     |                 | 0.027021147 |
| ENST00000303635 | ENSG00000171735 (CAMTA1)  | hsa-miR-146a-5p | 0.819997    |
| UTR3            | 1:7826839-7826865         |                 | 0.002786948 |
| UTR3            | 1:7826862-7826887         |                 | 0.005694066 |
| UTR3            | 1:7827024-7827044         |                 | 0.002931474 |
| UTR3            | 1:7827068-7827094         |                 | 0.01425906  |
| UTR3            | 1:7829134-7829157         |                 | 0.006515012 |
| UTR3            | 1:6880274-6880289         |                 | 0.013035222 |
| UTR3            | 1:7724909-7724928         |                 | 0.006354744 |
| ENST00000402775 | ENSG00000172478 (C2orf54) | hsa-miR-146a-5p | 0.819808    |
| UTR3            | 2:241825675-241825699     |                 | 0.013157252 |
| UTR3            | 2:241825655-241825678     |                 | 0.022310365 |
| ENST00000383083 | ENSG00000114698 (PLSCR4)  | hsa-miR-146a-5p | 0.819478    |
| UTR3            | 3:145911887-145911901     |                 | 0.026444213 |
| UTR3            | 3:145911548-145911565     |                 | 0.004284452 |
| UTR3            | 3:145911197-145911210     |                 | 0.004702441 |
| ENST00000379096 | ENSG00000076554 (TPD52)   | hsa-miR-146a-5p | 0.818928    |
| UTR3            | 8:80949928-80949950       |                 | 0.005406207 |
| UTR3            | 8:80948638-80948658       |                 | 0.001244509 |
| UTR3            | 8:80947175-80947196       |                 | 0.02871975  |
| ENST00000238961 | ENSG00000119906 (FAM178A) | hsa-miR-146a-5p | 0.81875     |
| UTR3            | 10:102722870-102722889    |                 | 0.001601739 |
| UTR3            | 10:102723398-102723416    |                 | 0.003823771 |
| UTR3            | 10:102723780-102723808    |                 | 0.011639954 |
| UTR3            | 10:102724860-102724884    |                 | 0.01286295  |
| UTR3            | 10:102710465-102710488    |                 | 0.029728867 |

|                 |                           |                 |          |
|-----------------|---------------------------|-----------------|----------|
| ENST00000379119 | ENSG00000075790 (BCAP29)  | hsa-miR-146a-5p | 0.81767  |
| UTR3            | 7:107260439-107260463     | 0.002114259     |          |
| UTR3            | 7:107261947-107261972     | 0.001731328     |          |
| UTR3            | 7:107263092-107263104     | 0.03138659      |          |
| ENST00000361421 | ENSG00000198846 (TOX)     | hsa-miR-146a-5p | 0.816953 |
| UTR3            | 8:59720222-59720237       | 0.025981799     |          |
| UTR3            | 8:59719023-59719041       | 0.00917191      |          |
| ENST00000532485 | ENSG00000078124 (ACER3)   | hsa-miR-146a-5p | 0.816796 |
| UTR3            | 11:76731856-76731872      | 0.01743904      |          |
| UTR3            | 11:76732268-76732291      | 0.012409535     |          |
| UTR3            | 11:76735793-76735810      | 0.002203705     |          |
| UTR3            | 11:76737233-76737245      | 0.003084301     |          |
| ENST00000329468 | ENSG00000185823 (NPAP1)   | hsa-miR-146a-5p | 0.816362 |
| UTR3            | 15:24925614-24925633      | 0.018300963     |          |
| UTR3            | 15:24925883-24925906      | 0.003981422     |          |
| UTR3            | 15:24928276-24928285      | 0.004644839     |          |
| UTR3            | 15:24928303-24928321      | 0.005222014     |          |
| UTR3            | 15:24921637-24921665      | 0.017244096     |          |
| ENST00000350082 | ENSG00000112144 (ICK)     | hsa-miR-146a-5p | 0.814819 |
| UTR3            | 6:52868993-52869020       | 0.009217637     |          |
| UTR3            | 6:52868939-52868967       | 0.002945417     |          |
| UTR3            | 6:52867894-52867918       | 0.00240255      |          |
| UTR3            | 6:52867112-52867126       | 0.006767501     |          |
| UTR3            | 6:52866723-52866747       | 0.005276483     |          |
| UTR3            | 6:52866462-52866484       | 0.004904195     |          |
| UTR3            | 6:52866398-52866419       | 0.003407761     |          |
| ENST00000414716 | ENSG00000099814 (CEP170B) | hsa-miR-146a-5p | 0.814324 |
| UTR3            | 14:105361371-105361387    | 0.005517849     |          |
| UTR3            | 14:105362278-105362301    | 0.00405838      |          |
| UTR3            | 14:105362965-105362993    | 0.025291736     |          |
| ENST00000343407 | ENSG00000128536 (CDHR3)   | hsa-miR-146a-5p | 0.814321 |
| UTR3            | 7:105673770-105673790     | 0.012277562     |          |
| UTR3            | 7:105676041-105676068     | 0.001889964     |          |
| UTR3            | 7:105676454-105676474     | 0.004429973     |          |
| UTR3            | 7:105676684-105676710     | 0.010792787     |          |
| UTR3            | 7:105676801-105676816     | 0.005477345     |          |
| ENST00000319550 | ENSG00000178425 (NT5DC1)  | hsa-miR-146a-5p | 0.814305 |
| UTR3            | 6:116565478-116565497     | 0.010523001     |          |
| UTR3            | 6:116565868-116565889     | 0.003136586     |          |
| UTR3            | 6:116568307-116568330     | 0.001434296     |          |
| UTR3            | 6:116569206-116569215     | 0.001229383     |          |
| UTR3            | 6:116569390-116569413     | 0.001679868     |          |
| UTR3            | 6:116570335-116570358     | 0.012005825     |          |
| UTR3            | 6:116429571-116429597     | 0.007464838     |          |

|                 |                           |                 |             |
|-----------------|---------------------------|-----------------|-------------|
| UTR3            | 6:116542326-116542352     |                 | 0.019226713 |
| ENST00000370457 | ENSG00000155966 (AFF2)    | hsa-miR-146a-5p | 0.814182    |
| UTR3            | X:148072941-148072960     |                 | 0.008736328 |
| UTR3            | X:148073619-148073638     |                 | 0.001342664 |
| UTR3            | X:148076382-148076399     |                 | 0.001658614 |
| UTR3            | X:148076701-148076721     |                 | 0.00226229  |
| UTR3            | X:148077490-148077513     |                 | 0.00128606  |
| UTR3            | X:148081990-148082015     |                 | 0.019566605 |
| ENST00000299163 | ENSG00000166135 (HIF1AN)  | hsa-miR-146a-5p | 0.812644    |
| UTR3            | 10:102308688-102308701    |                 | 0.005071994 |
| UTR3            | 10:102308877-102308896    |                 | 0.003489716 |
| UTR3            | 10:102309669-102309685    |                 | 0.001891869 |
| UTR3            | 10:102309708-102309722    |                 | 0.000709555 |
| UTR3            | 10:102309845-102309872    |                 | 0.001429449 |
| UTR3            | 10:102310125-102310147    |                 | 0.001518464 |
| UTR3            | 10:102311872-102311895    |                 | 0.001490624 |
| UTR3            | 10:102312007-102312026    |                 | 0.001036965 |
| UTR3            | 10:102312293-102312308    |                 | 0.001816893 |
| UTR3            | 10:102313342-102313362    |                 | 0.001903774 |
| UTR3            | 10:102315086-102315103    |                 | 0.004776411 |
| UTR3            | 10:102315196-102315213    |                 | 0.000867296 |
| UTR3            | 10:102315298-102315310    |                 | 0.004519592 |
| UTR3            | 10:102316392-102316408    |                 | 0.004164319 |
| ENST00000240189 | ENSG00000120952 (PRAMEF2) | hsa-miR-146a-5p | 0.812298    |
| UTR3            | 1:12921661-12921674       |                 | 0.034649855 |
| ENST00000322244 | ENSG00000033178 (UBA6)    | hsa-miR-146a-5p | 0.812105    |
| UTR3            | 4:68479257-68479272       |                 | 0.001495473 |
| UTR3            | 4:68479234-68479257       |                 | 0.02861081  |
| UTR3            | 4:68478596-68478624       |                 | 0.003232694 |
| UTR3            | 4:68539431-68539454       |                 | 0.007861871 |
| ENST00000425817 | ENSG00000135917 (SLC19A3) | hsa-miR-146a-5p | 0.811911    |
| UTR3            | 2:228551948-228551971     |                 | 0.013725957 |
| UTR3            | 2:228551607-228551619     |                 | 0.020882441 |
| ENST00000602526 | ENSG00000106692 (FKTN)    | hsa-miR-146a-5p | 0.811769    |
| UTR3            | 9:108363517-108363544     |                 | 0.006213445 |
| UTR3            | 9:108370123-108370143     |                 | 0.024500604 |
| UTR3            | 9:108398366-108398388     |                 | 0.001580433 |
| UTR3            | 9:108401479-108401500     |                 | 0.002298701 |
| ENST00000514049 | ENSG00000103599 (IQCH)    | hsa-miR-146a-5p | 0.811425    |
| UTR3            | 15:67713783-67713808      |                 | 0.018751338 |
| UTR3            | 15:67793315-67793329      |                 | 0.003438897 |
| UTR3            | 15:67793772-67793794      |                 | 0.012366219 |
| ENST00000392316 | ENSG00000128641 (MYO1B)   | hsa-miR-146a-5p | 0.81075     |
| UTR3            | 2:192289973-192289994     |                 | 0.007750911 |
| UTR3            | 2:192290089-192290109     |                 | 0.026733539 |

|                 |                           |                 |          |
|-----------------|---------------------------|-----------------|----------|
| ENST00000333407 | ENSG00000133477 (FAM83F)  | hsa-miR-146a-5p | 0.810718 |
| UTR3            | 22:40427908-40427936      | 0.001016567     |          |
| UTR3            | 22:40430198-40430223      | 0.00135714      |          |
| UTR3            | 22:40433631-40433649      | 0.004239232     |          |
| UTR3            | 22:40435201-40435220      | 0.003226278     |          |
| UTR3            | 22:40435575-40435594      | 0.001239826     |          |
| UTR3            | 22:40436463-40436479      | 0.002981752     |          |
| UTR3            | 22:40438200-40438228      | 0.002463448     |          |
| UTR3            | 22:40438445-40438463      | 0.012835697     |          |
| UTR3            | 22:40438539-40438555      | 0.0013258       |          |
| UTR3            | 22:40439481-40439504      | 0.003795279     |          |
| ENST00000469044 | ENSG00000114098 (ARMC8)   | hsa-miR-146a-5p | 0.810457 |
| UTR3            | 3:138015515-138015536     | 0.034453296     |          |
| ENST00000409711 | ENSG00000071082 (RPL31)   | hsa-miR-146a-5p | 0.810425 |
| UTR3            | 2:101621275-101621294     | 0.019571079     |          |
| UTR3            | 2:101622521-101622543     | 0.014878721     |          |
| ENST00000412050 | ENSG00000107864 (CPEB3)   | hsa-miR-146a-5p | 0.809908 |
| UTR3            | 10:93811861-93811880      | 0.007206258     |          |
| UTR3            | 10:93810100-93810120      | 0.002187882     |          |
| UTR3            | 10:93808715-93808733      | 0.003518094     |          |
| UTR3            | 10:93808320-93808344      | 0.006192437     |          |
| UTR3            | 10:93806645-93806664      | 0.010864799     |          |
| UTR3            | 10:93904786-93904811      | 0.011406407     |          |
| UTR3            | 10:93851646-93851668      | 0.012885785     |          |
| ENST00000555640 | ENSG00000165792 (METTL17) | hsa-miR-146a-5p | 0.809809 |
| UTR3            | 14:21463056-21463083      | 0.003154288     |          |
| UTR3            | 14:21463341-21463366      | 0.005820414     |          |
| UTR3            | 14:21464281-21464306      | 0.002796868     |          |
| UTR3            | 14:21464693-21464714      | 0.02129171      |          |
| UTR3            | 14:21460260-21460276      | 0.007978054     |          |
| ENST00000312413 | ENSG00000011021 (CLCN6)   | hsa-miR-146a-5p | 0.809612 |
| UTR3            | 1:11893951-11893974       | 0.005850941     |          |
| UTR3            | 1:11900742-11900767       | 0.001516545     |          |
| UTR3            | 1:11903123-11903147       | 0.024956919     |          |
| UTR3            | 1:11882830-11882853       | 0.012026165     |          |
| ENST00000259154 | ENSG00000136636 (KCTD3)   | hsa-miR-146a-5p | 0.809079 |
| UTR3            | 1:215794540-215794565     | 0.004540572     |          |
| UTR3            | 1:215795081-215795104     | 0.026274943     |          |
| UTR3            | 1:215751014-215751035     | 0.019655202     |          |
| ENST00000608703 | ENSG00000204389 (HSPA1A)  | hsa-miR-146a-5p | 0.808696 |
| UTR3            | 6:31785512-31785538       | 0.034266568     |          |
| ENST00000493950 | ENSG00000118492 (ADGB)    | hsa-miR-146a-5p | 0.8083   |
| UTR3            | 6:146997491-146997519     | 0.004564742     |          |

|                 |                            |                 |             |
|-----------------|----------------------------|-----------------|-------------|
|                 | 6:147038722;147042539-     |                 |             |
| UTR3            | 147038735;147042544        |                 | 0.023540276 |
| UTR3            | 6:147045342-147045363      |                 | 0.000975903 |
| UTR3            | 6:147045565-147045581      |                 | 0.001350422 |
| UTR3            | 6:147045794-147045807      |                 | 0.001691989 |
| UTR3            | 6:147045817-147045832      |                 | 0.000794179 |
|                 | 6:147105911;147106746-     |                 |             |
| UTR3            | 147105930;147106753        |                 | 0.001307287 |
| ENST00000351698 | ENSG00000136827 (TOR1A)    | hsa-miR-146a-5p | 0.808176    |
| UTR3            | 9:132575819-132575826      |                 | 0.034211707 |
|                 | ENSG00000188938            |                 |             |
| ENST00000423591 | (FAM120AOS)                | hsa-miR-146a-5p | 0.807513    |
| UTR3            | 9:96209771-96209791        |                 | 0.008450432 |
| UTR3            | 9:96209303-96209325        |                 | 0.009916228 |
| UTR3            | 9:96209027-96209055        |                 | 0.012073602 |
| UTR3            | 9:96208970-96208988        |                 | 0.003701613 |
| ENST00000336505 | ENSG00000173611 (SCAI)     | hsa-miR-146a-5p | 0.807302    |
| UTR3            | 9:127714797-127714818      |                 | 0.005612537 |
| UTR3            | 9:127714622-127714642      |                 | 0.003480565 |
| UTR3            | 9:127713242-127713265      |                 | 0.000948215 |
| UTR3            | 9:127710808-127710822      |                 | 0.00120627  |
| UTR3            | 9:127707066-127707080      |                 | 0.002398881 |
| UTR3            | 9:127706412-127706430      |                 | 0.007802349 |
| UTR3            | 9:127705404-127705418      |                 | 0.00514937  |
| UTR3            | 9:127705001-127705020      |                 | 0.007521476 |
| ENST00000585524 | ENSG00000134042 (MRO)      | hsa-miR-146a-5p | 0.807072    |
| UTR3            | 18:48326483-48326493       |                 | 0.00613563  |
| UTR3            | 18:48325619-48325639       |                 | 0.001514596 |
| UTR3            | 18:48325410-48325429       |                 | 0.003975182 |
| UTR3            | 18:48325169-48325196       |                 | 0.00311712  |
| UTR3            | 18:48324939-48324955       |                 | 0.019353024 |
| ENST00000370483 | ENSG00000014919 (COX15)    | hsa-miR-146a-5p | 0.806945    |
| UTR3            | 10:101472031-101472051     |                 | 0.016392187 |
| UTR3            | 10:101471820-101471843     |                 | 0.017689976 |
|                 |                            |                 |             |
| ENST00000542527 | ENSG00000185716 (C16orf52) | hsa-miR-146a-5p | 0.806875    |
| UTR3            | 16:22092350-22092368       |                 | 0.030686888 |
| UTR3            | 16:22095000-22095015       |                 | 0.00338797  |
|                 |                            |                 |             |
| ENST00000340106 | ENSG00000242384 (TBC1D3H)  | hsa-miR-146a-5p | 0.806183    |
| UTR3            | 17:34746453-34746471       |                 | 0.034002386 |
| ENST00000523377 | ENSG00000083099 (LYRM2)    | hsa-miR-146a-5p | 0.806008    |
| UTR3            | 6:90345539-90345557        |                 | 0.006140542 |
| UTR3            | 6:90342858-90342868        |                 | 0.002949671 |
| UTR3            | 6:90342589-90342611        |                 | 0.024893825 |
| ENST00000228865 | ENSG00000111269 (CREBL2)   | hsa-miR-146a-5p | 0.805575    |
| UTR3            | 12:12795370-12795395       |                 | 0.024429945 |

|                 |                           |                 |             |
|-----------------|---------------------------|-----------------|-------------|
| UTR3            | 12:12796321-12796340      |                 | 0.001588396 |
| UTR3            | 12:12797656-12797678      |                 | 0.002738456 |
| UTR3            | 12:12797914-12797930      |                 | 0.005182072 |
| ENST00000585558 | ENSG00000153822 (KCNJ16)  | hsa-miR-146a-5p | 0.805145    |
| UTR3            | 17:68129633-68129656      |                 | 0.031531036 |
| UTR3            | 17:68130229-68130251      |                 | 0.002362973 |
| ENST00000244227 | ENSG00000124380 (SNRNP27) | hsa-miR-146a-5p | 0.804338    |
| UTR3            | 2:70131526-70131545       |                 | 0.029025064 |
| UTR3            | 2:70131973-70131987       |                 | 0.004784998 |
| ENST00000251527 | ENSG00000117868 (ESYT2)   | hsa-miR-146a-5p | 0.803535    |
| UTR3            | 7:158526411-158526433     |                 | 0.032044149 |
| UTR3            | 7:158525768-158525789     |                 | 0.001682703 |
| ENST00000381854 | ENSG00000106993 (CDC37L1) | hsa-miR-146a-5p | 0.803127    |
| UTR3            | 9:4706370-4706385         |                 | 0.027901642 |
| UTR3            | 9:4706726-4706743         |                 | 0.00504483  |
| UTR3            | 9:4679848-4679864         |                 | 0.004440741 |
| ENST00000515655 | ENSG00000118777 (ABCG2)   | hsa-miR-146a-5p | 0.802691    |
| UTR3            | 4:89012455-89012475       |                 | 0.002832751 |
| UTR3            | 4:89011547-89011560       |                 | 0.029199285 |
| UTR3            | 4:89052315-89052340       |                 | 0.009394266 |
| ENST00000360647 | ENSG00000163848 (ZNF148)  | hsa-miR-146a-5p | 0.801928    |
| UTR3            | 3:124950230-124950256     |                 | 0.00504166  |
| UTR3            | 3:124949452-124949467     |                 | 0.009013353 |
| UTR3            | 3:124948350-124948362     |                 | 0.00183743  |
| UTR3            | 3:124946938-124946964     |                 | 0.008322163 |
| UTR3            | 3:124946114-124946135     |                 | 0.001994864 |
| UTR3            | 3:124952393-124952413     |                 | 0.036334123 |
| ENST00000358823 | ENSG00000118200 (CAMSAP2) | hsa-miR-146a-5p | 0.801428    |
| UTR3            | 1:200828090-200828107     |                 | 0.025074353 |
| UTR3            | 1:200828632-200828659     |                 | 0.004654824 |
| UTR3            | 1:200818011-200818026     |                 | 0.020605511 |
| ENST00000392638 | ENSG00000148814 (LRRC27)  | hsa-miR-146a-5p | 0.80105     |
| UTR3            | 10:134191227-134191251    |                 | 0.002930487 |
| UTR3            | 10:134191915-134191934    |                 | 0.001350091 |
| UTR3            | 10:134192442-134192463    |                 | 0.001188846 |
| UTR3            | 10:134192518-134192529    |                 | 0.000400964 |
| UTR3            | 10:134192581-134192595    |                 | 0.00045294  |
| UTR3            | 10:134192650-134192661    |                 | 0.00040451  |
| UTR3            | 10:134192716-134192727    |                 | 0.000406323 |
| UTR3            | 10:134192782-134192793    |                 | 0.000646071 |
| UTR3            | 10:134192848-134192859    |                 | 0.000416738 |
| UTR3            | 10:134192980-134192991    |                 | 0.000897048 |
| UTR3            | 10:134192980-134192997    |                 | 0.001572886 |
| UTR3            | 10:134194961-134194987    |                 | 0.022803859 |

|                 |                           |                 |          |
|-----------------|---------------------------|-----------------|----------|
| ENST00000346248 | ENSG00000182022 (CHST15)  | hsa-miR-146a-5p | 0.800751 |
| UTR3            | 10:125768818-125768838    | 0.003204433     |          |
| UTR3            | 10:125768266-125768286    | 0.008572478     |          |
| UTR3            | 10:125767411-125767433    | 0.002705675     |          |
| UTR3            | 10:125767338-125767366    | 0.017636594     |          |
| UTR3            | 10:125804367-125804393    | 0.003043532     |          |
| UTR3            | 10:125804137-125804155    | 0.004696971     |          |
| ENST00000543630 | ENSG00000086717 (PPEF1)   | hsa-miR-146a-5p | 0.800496 |
| UTR3            | X:18845418-18845445       | 0.033414056     |          |
| ENST00000418596 | ENSG00000155744 (FAM126B) | hsa-miR-146a-5p | 0.800482 |
| UTR3            | 2:201845585-201845605     | 0.017169595     |          |
| UTR3            | 2:201845282-201845302     | 0.004812318     |          |
| UTR3            | 2:201844985-201844995     | 0.005636291     |          |
| UTR3            | 2:201841363-201841390     | 0.001324138     |          |
| UTR3            | 2:201839100-201839115     | 0.004470238     |          |
| ENST00000554908 | ENSG00000197045 (GMFB)    | hsa-miR-146a-5p | 0.800375 |
| UTR3            | 14:54946618-54946634      | 0.002032688     |          |
| UTR3            | 14:54942715-54942736      | 0.0113847       |          |
| UTR3            | 14:54942343-54942366      | 0.00369351      |          |
| UTR3            | 14:54941351-54941375      | 0.016290765     |          |
| ENST00000244020 | ENSG00000124193 (SRSF6)   | hsa-miR-146a-5p | 0.800366 |
| UTR3            | 20:42090530-42090552      | 0.009990153     |          |
| UTR3            | 20:42091598-42091610      | 0.011165082     |          |
| UTR3            | 20:42091877-42091896      | 0.012245467     |          |
| ENST00000366553 | ENSG00000203668 (CHML)    | hsa-miR-146a-5p | 0.800147 |
| UTR3            | 1:241797040-241797062     | 0.007759747     |          |
| UTR3            | 1:241795712-241795732     | 0.001850773     |          |
| UTR3            | 1:241795648-241795671     | 0.001945436     |          |
| UTR3            | 1:241794297-241794312     | 0.003100815     |          |
| UTR3            | 1:241794261-241794274     | 0.000908702     |          |
| UTR3            | 1:241793508-241793527     | 0.017812824     |          |
| ENST00000369331 | ENSG00000165806 (CASP7)   | hsa-miR-146a-5p | 0.799681 |
| UTR3            | 10:115489435-115489461    | 0.003901283     |          |
| UTR3            | 10:115489776-115489793    | 0.029429444     |          |
| ENST00000453386 | ENSG00000136527 (TRA2B)   | hsa-miR-146a-5p | 0.799364 |
| UTR3            | 3:185634035-185634062     | 0.010738691     |          |
| UTR3            | 3:185633805-185633832     | 0.022559763     |          |
| ENST00000294383 | ENSG00000162402 (USP24)   | hsa-miR-146a-5p | 0.79929  |
| UTR3            | 1:55534574-55534599       | 0.00378         |          |
| UTR3            | 1:55533997-55534009       | 0.005121792     |          |
| UTR3            | 1:55532948-55532959       | 0.001786562     |          |
| UTR3            | 1:55532439-55532463       | 0.01883046      |          |
| UTR3            | 1:55620352-55620368       | 0.009324735     |          |
| UTR3            | 1:55598345-55598361       | 0.011109797     |          |
| ENST00000467709 | ENSG00000147459 (DOCK5)   | hsa-miR-146a-5p | 0.798886 |
| UTR3            | 8:25222161-25222182       | 0.025380208     |          |



|                 |                                        |                 |             |
|-----------------|----------------------------------------|-----------------|-------------|
| UTR3            | 8:25224435-25224457                    |                 | 0.002822646 |
| UTR3            | 8:25250351-25250369                    |                 | 0.00237147  |
| UTR3            | 8:25269223-25269241                    |                 | 0.002675448 |
| ENST00000529084 | ENSG00000140798 (ABCC12)               | hsa-miR-146a-5p | 0.79857     |
| UTR3            | 16:48122519-48122534                   |                 | 0.002132746 |
| UTR3            | 16:48119558-48119585                   |                 | 0.006108519 |
| UTR3            | 16:48117855-48117879                   |                 | 0.019636209 |
| UTR3            | 16:48174822;48175117-48174831;48175129 |                 | 0.027613133 |
| ENST00000371207 | ENSG00000138185 (ENTPD1)               | hsa-miR-146a-5p | 0.79806     |
| UTR3            | 10:97626715-97626739                   |                 | 0.020952474 |
| UTR3            | 10:97627826-97627853                   |                 | 0.002408102 |
| UTR3            | 10:97629589-97629598                   |                 | 0.002106478 |
| UTR3            | 10:97630696-97630722                   |                 | 0.001942588 |
| UTR3            | 10:97630737-97630754                   |                 | 0.003138774 |
| UTR3            | 10:97632180-97632207                   |                 | 0.001227857 |
| UTR3            | 10:97634232-97634251                   |                 | 0.000858445 |
| UTR3            | 10:97634342-97634369                   |                 | 0.000531118 |
| ENST00000273854 | ENSG00000145242 (EPHA5)                | hsa-miR-146a-5p | 0.797077    |
| UTR3            | 4:66187893-66187904                    |                 | 0.021495963 |
| UTR3            | 4:66186329-66186351                    |                 | 0.003184204 |
| UTR3            | 4:66186190-66186209                    |                 | 0.002314721 |
| UTR3            | 4:66185383-66185406                    |                 | 0.006071478 |
| ENST00000316660 | ENSG00000141682 (PMAIP1)               | hsa-miR-146a-5p | 0.796965    |
| UTR3            | 18:57570010-57570033                   |                 | 0.003198924 |
| UTR3            | 18:57570980-57570996                   |                 | 0.029856057 |
| ENST00000372687 | ENSG00000156671 (SAMD8)                | hsa-miR-146a-5p | 0.796521    |
| UTR3            | 10:76936180-76936193                   |                 | 0.020288469 |
| UTR3            | 10:76936349-76936359                   |                 | 0.00527722  |
| UTR3            | 10:76936507-76936520                   |                 | 0.00355433  |
| UTR3            | 10:76938002-76938023                   |                 | 0.002193215 |
| UTR3            | 10:76941161-76941185                   |                 | 0.001696951 |
| ENST00000360587 | ENSG00000197361 (FBXL22)               | hsa-miR-146a-5p | 0.795943    |
| UTR3            | 15:63893949-63893971                   |                 | 0.017833057 |
| UTR3            | 15:63894411-63894437                   |                 | 0.015118952 |
| ENST00000478199 | ENSG00000162885 (B3GALNT2)             | hsa-miR-146a-5p | 0.795631    |
| UTR3            | 1:235647737-235647755                  |                 | 0.01373484  |
| UTR3            | 1:235634175-235634194                  |                 | 0.019185797 |
| ENST00000440598 | ENSG00000197008 (ZNF138)               | hsa-miR-146a-5p | 0.794882    |
| UTR3            | 7:64276018;64291829-64276031;64291841  |                 | 0.004359443 |
| UTR3            | 7:64293234-64293252                    |                 | 0.015200889 |
| UTR3            | 7:64293311-64293336                    |                 | 0.012238925 |

|                 |                           |                 |             |
|-----------------|---------------------------|-----------------|-------------|
| UTR3            | 7:64275307-64275333       |                 | 0.006069365 |
| ENST00000254605 | ENSG00000132275 (RRP8)    | hsa-miR-146a-5p | 0.794735    |
| UTR3            | 11:6619691-6619714        |                 | 0.001391633 |
| UTR3            | 11:6618097-6618112        |                 | 0.004717997 |
| UTR3            | 11:6617684-6617703        |                 | 0.002656561 |
| UTR3            | 11:6617323-6617343        |                 | 0.024064514 |
| ENST00000407780 | ENSG00000160223 (ICOSLG)  | hsa-miR-146a-5p | 0.794277    |
| UTR3            | 21:45648010-45648035      |                 | 0.001252197 |
| UTR3            | 21:45644994-45645011      |                 | 0.000789679 |
| UTR3            | 21:45643299-45643316      |                 | 0.013107945 |
| UTR3            | 21:45643117-45643129      |                 | 0.002441588 |
| UTR3            | 21:45642996-45643024      |                 | 0.002396386 |
| UTR3            | 21:45642984-45642999      |                 | 0.008114795 |
| UTR3            | 21:45642916-45642936      |                 | 0.004682218 |
| ENST00000391884 | ENSG00000182324 (KCNJ14)  | hsa-miR-146a-5p | 0.793783    |
| UTR3            | 19:48968454-48968477      |                 | 0.003501821 |
| UTR3            | 19:48969105-48969121      |                 | 0.02497217  |
| UTR3            | 19:48967704-48967728      |                 | 0.010993673 |
| UTR3            | 19:48967987-48968002      |                 | 0.011412551 |
| ENST00000217289 | ENSG00000101311 (FERMT1)  | hsa-miR-146a-5p | 0.793587    |
| UTR3            | 20:6057529-6057553        |                 | 0.010345656 |
| UTR3            | 20:6056769-6056794        |                 | 0.002687995 |
| UTR3            | 20:6056399-6056415        |                 | 0.01527335  |
| UTR3            | 20:6056006-6056030        |                 | 0.002873177 |
| UTR3            | 20:6093145-6093160        |                 | 0.008741098 |
| ENST00000467604 | ENSG00000121578 (B4GALT4) | hsa-miR-146a-5p | 0.793391    |
| UTR3            | 3:118934903-118934925     |                 | 0.02367734  |
| UTR3            | 3:118934455-118934477     |                 | 0.00294538  |
| UTR3            | 3:118934427-118934452     |                 | 0.001582977 |
| UTR3            | 3:118931724-118931744     |                 | 0.001744108 |
| UTR3            | 3:118930997-118931013     |                 | 0.002746548 |
| ENST00000373625 | ENSG00000025800 (KPNA6)   | hsa-miR-146a-5p | 0.793314    |
| UTR3            | 1:32638817-32638829       |                 | 0.001857727 |
| UTR3            | 1:32639943-32639959       |                 | 0.003815813 |
| UTR3            | 1:32639956-32639983       |                 | 0.000778364 |
| UTR3            | 1:32640971-32640987       |                 | 0.001778075 |
| UTR3            | 1:32641876-32641904       |                 | 0.005061106 |
| UTR3            | 1:32641954-32641975       |                 | 0.019397565 |
| ENST00000225983 | ENSG00000108840 (HDAC5)   | hsa-miR-146a-5p | 0.79306     |
| UTR3            | 17:42155016-42155028      |                 | 0.004340476 |
| UTR3            | 17:42154230-42154252      |                 | 0.025987229 |
|                 | 17:42164097;42164780-     |                 |             |
| UTR3            | 42164105;42164796         |                 | 0.005803407 |
| UTR3            | 17:42157560-42157581      |                 | 0.00715405  |

|                 |                             |                 |          |
|-----------------|-----------------------------|-----------------|----------|
| ENST00000396981 | ENSG00000132388 (UBE2G1)    | hsa-miR-146a-5p | 0.792305 |
| UTR3            | 17:4175255-4175273          | 0.01720093      |          |
| UTR3            | 17:4174831-4174852          | 0.003536714     |          |
| UTR3            | 17:4173279-4173299          | 0.00210752      |          |
| UTR3            | 17:4173041-4173063          | 0.00974311      |          |
| ENST00000355459 | ENSG00000198390 (KRTAP13-1) | hsa-miR-146a-5p | 0.791614 |
| UTR3            | 21:31769024-31769044        | 0.032519754     |          |
| ENST00000436544 | ENSG00000163803 (PLB1)      | hsa-miR-146a-5p | 0.790442 |
| UTR3            | 2:28817217-28817232         | 0.005300229     |          |
| UTR3            | 2:28817245-28817261         | 0.024005107     |          |
| UTR3            | 2:28817446-28817472         | 0.003098494     |          |
| ENST00000366624 | ENSG00000143674 (MLK4)      | hsa-miR-146a-5p | 0.790407 |
| UTR3            | 1:233518734-233518760       | 0.019230497     |          |
| UTR3            | 1:233519048-233519075       | 0.013169906     |          |
| ENST00000423035 | ENSG00000197121 (PGAP1)     | hsa-miR-146a-5p | 0.790173 |
| UTR3            | 2:197784755-197784779       | 0.022302573     |          |
| UTR3            | 2:197729715-197729740       | 0.001737863     |          |
| UTR3            | 2:197704417-197704434       | 0.001106659     |          |
| UTR3            | 2:197703814-197703842       | 0.00161561      |          |
| UTR3            | 2:197703442-197703460       | 0.001747779     |          |
| UTR3            | 2:197702039-197702056       | 0.001717825     |          |
| UTR3            | 2:197701652-197701676       | 0.002149048     |          |
| ENST00000548411 | ENSG00000151746 (BICD1)     | hsa-miR-146a-5p | 0.790171 |
| UTR3            | 12:32532605-32532616        | 0.001157788     |          |
| UTR3            | 12:32533047-32533067        | 0.002619715     |          |
| UTR3            | 12:32534450-32534472        | 0.00422622      |          |
| UTR3            | 12:32535634-32535651        | 0.00459224      |          |
| UTR3            | 12:32536241-32536266        | 0.019781213     |          |
| ENST00000274459 | ENSG00000145782 (ATG12)     | hsa-miR-146a-5p | 0.78979  |
| UTR3            | 5:115167179-115167195       | 0.028945651     |          |
| UTR3            | 5:115166121-115166140       | 0.001621194     |          |
| UTR3            | 5:115165026-115165052       | 0.001772738     |          |
| ENST00000592780 | ENSG00000256294 (ZNF225)    | hsa-miR-146a-5p | 0.789555 |
| UTR3            | 19:44635116-44635141        | 0.027657062     |          |
| UTR3            | 19:44636001-44636020        | 0.001884249     |          |
| UTR3            | 19:44636331-44636356        | 0.002775217     |          |
| ENST00000396373 | ENSG00000139083 (ETV6)      | hsa-miR-146a-5p | 0.789387 |
| UTR3            | 12:12047232-12047255        | 0.022345914     |          |
| UTR3            | 12:12048243-12048255        | 0.009954017     |          |
| ENST00000545826 | ENSG00000168769 (TET2)      | hsa-miR-146a-5p | 0.789295 |
| UTR3            | 4:106196925-106196949       | 0.002291143     |          |
| UTR3            | 4:106197265-106197284       | 0.002675414     |          |
| UTR3            | 4:106197722-106197745       | 0.014317461     |          |
| UTR3            | 4:106158376-106158403       | 0.026515474     |          |
| UTR3            | 4:106164037-106164062       | 0.027803408     |          |

|                 |                           |                 |          |
|-----------------|---------------------------|-----------------|----------|
|                 | ENSG00000170903           |                 |          |
| ENST00000301919 | (MSANTD4)                 | hsa-miR-146a-5p | 0.788917 |
| UTR3            | 11:105880211-105880228    | 0.006236186     |          |
| UTR3            | 11:105879957-105879972    | 0.021967007     |          |
| UTR3            | 11:105879576-105879598    | 0.002515412     |          |
| UTR3            | 11:105879503-105879527    | 0.001535181     |          |
| ENST00000199320 | ENSG00000086189 (DIMT1)   | hsa-miR-146a-5p | 0.788691 |
| UTR3            | 5:61684334-61684340       | 0.003895811     |          |
| UTR3            | 5:61683481-61683495       | 0.002358427     |          |
| UTR3            | 5:61683123-61683143       | 0.025977343     |          |
| ENST00000508296 | ENSG00000182230 (FAM153B) | hsa-miR-146a-5p | 0.788363 |
| UTR3            | 5:175547885-175547912     | 0.001410119     |          |
| UTR3            | 5:175548749-175548769     | 0.016404945     |          |
| UTR3            | 5:175552791-175552811     | 0.009939724     |          |
| UTR3            | 5:175553052-175553075     | 0.004444682     |          |
| ENST00000343776 | ENSG00000181450 (ZNF678)  | hsa-miR-146a-5p | 0.788306 |
| UTR3            | 1:227844847-227844868     | 0.001411325     |          |
| UTR3            | 1:227845589-227845617     | 0.001705863     |          |
| UTR3            | 1:227845656-227845677     | 0.000915698     |          |
| UTR3            | 1:227846289-227846308     | 0.001496296     |          |
| UTR3            | 1:227846289-227846316     | 0.000538665     |          |
| UTR3            | 1:227847602-227847607     | 0.002471476     |          |
| UTR3            | 1:227848675-227848692     | 0.001296164     |          |
| UTR3            | 1:227848927-227848942     | 0.001675199     |          |
| UTR3            | 1:227842599-227842617     | 0.014931939     |          |
| UTR3            | 1:227842683-227842701     | 0.016890148     |          |
| UTR3            | 1:227843096-227843121     | 0.02368399      |          |
| UTR3            | 1:227843355-227843373     | 0.018067396     |          |
| ENST00000531224 | ENSG00000029363 (BCLAF1)  | hsa-miR-146a-5p | 0.786736 |
| UTR3            | 6:136581529-136581547     | 0.004846552     |          |
| UTR3            | 6:136578908-136578926     | 0.001669199     |          |
| UTR3            | 6:136578778-136578802     | 0.018482407     |          |
| UTR3            | 6:136600940-136600964     | 0.010111164     |          |
| UTR3            | 6:136589406-136589426     | 0.023612824     |          |
| ENST00000272217 | ENSG00000143862 (ARL8A)   | hsa-miR-146a-5p | 0.786392 |
| UTR3            | 1:202103382-202103406     | 0.003178564     |          |
| UTR3            | 1:202102761-202102784     | 0.028828498     |          |
| ENST00000361752 | ENSG00000112531 (QKI)     | hsa-miR-146a-5p | 0.786332 |
| UTR3            | 6:163992133-163992154     | 0.005361624     |          |
| UTR3            | 6:163993552-163993579     | 0.002089316     |          |
| UTR3            | 6:163994244-163994267     | 0.010371853     |          |
| UTR3            | 6:163995782-163995799     | 0.00761089      |          |
| UTR3            | 6:163995962-163995975     | 0.00101077      |          |
| UTR3            | 6:163999561-163999584     | 0.005556766     |          |
| ENST00000434724 | ENSG00000103342 (GSPT1)   | hsa-miR-146a-5p | 0.786138 |
| UTR3            | 16:11966817-11966841      | 0.014792598     |          |

|                 |                            |                 |             |
|-----------------|----------------------------|-----------------|-------------|
| UTR3            | 16:11964549-11964574       |                 | 0.008569907 |
| UTR3            | 16:11964312-11964329       |                 | 0.00188468  |
| UTR3            | 16:11962760-11962774       |                 | 0.004784729 |
| UTR3            | 16:11962438-11962459       |                 | 0.001950414 |
| ENST00000394252 | ENSG00000170439 (METTL7B)  | hsa-miR-146a-5p | 0.786106    |
| UTR3            | 12:56078335-56078362       |                 | 0.029783908 |
| UTR3            | 12:56077729-56077751       |                 | 0.011985331 |
| ENST00000574951 | ENSG00000108509 (CAMTA2)   | hsa-miR-146a-5p | 0.785389    |
| UTR3            | 17:4884609-4884627         |                 | 0.02027205  |
| UTR3            | 17:4883473-4883491         |                 | 0.00380982  |
|                 | 17:4872263;4872445-        |                 |             |
| UTR3            | 4872276;4872455            |                 | 0.002864043 |
| UTR3            | 17:4872031-4872052         |                 | 0.001654475 |
| UTR3            | 17:4871386-4871404         |                 | 0.003309232 |
| ENST00000488550 | ENSG00000143995 (MEIS1)    | hsa-miR-146a-5p | 0.785228    |
| UTR3            | 2:66796057-66796083        |                 | 0.00673039  |
| UTR3            | 2:66796326-66796350        |                 | 0.007606194 |
| UTR3            | 2:66797828-66797852        |                 | 0.016552362 |
| UTR3            | 2:66798262-66798288        |                 | 0.001005052 |
| ENST00000601773 | ENSG00000160321 (ZNF208)   | hsa-miR-146a-5p | 0.785072    |
| UTR3            | 19:22122904-22122919       |                 | 0.014799106 |
| UTR3            | 19:22122675-22122703       |                 | 0.017079764 |
| ENST00000398844 | ENSG00000113615 (SEC24A)   | hsa-miR-146a-5p | 0.784522    |
| UTR3            | 5:134060879-134060906      |                 | 0.019176859 |
| UTR3            | 5:134061114-134061128      |                 | 0.004695416 |
| UTR3            | 5:134062733-134062753      |                 | 0.00480242  |
| UTR3            | 5:133996936-133996950      |                 | 0.016661386 |
| ENST00000449622 | ENSG00000160221 (C21orf33) | hsa-miR-146a-5p | 0.784354    |
| UTR3            | 21:45564953-45564969       |                 | 0.003070965 |
| UTR3            | 21:45565044-45565067       |                 | 0.002458611 |
| UTR3            | 21:45565422-45565441       |                 | 0.026279919 |
| ENST00000588388 | ENSG00000131941 (RHPN2)    | hsa-miR-146a-5p | 0.784007    |
| UTR3            | 19:33484917-33484928       |                 | 0.01217738  |
| UTR3            | 19:33470925-33470947       |                 | 0.00447251  |
| UTR3            | 19:33470803-33470821       |                 | 0.01216308  |
| UTR3            | 19:33470787-33470802       |                 | 0.002963009 |
| ENST00000323816 | ENSG00000007237 (GAS7)     | hsa-miR-146a-5p | 0.78372     |
| UTR3            | 17:9819999-9820019         |                 | 0.001889811 |
| UTR3            | 17:9819725-9819753         |                 | 0.0250281   |
| UTR3            | 17:9815638-9815664         |                 | 0.001388028 |
| UTR3            | 17:9885172-9885198         |                 | 0.00986756  |
| UTR3            | 17:9837490-9837502         |                 | 0.00814599  |
| ENST00000366910 | ENSG00000186205 (MARC1)    | hsa-miR-146a-5p | 0.783695    |
| UTR3            | 1:220986788-220986809      |                 | 0.025819244 |

|                 |                          |                 |             |
|-----------------|--------------------------|-----------------|-------------|
| UTR3            | 1:220987229-220987251    |                 | 0.002806726 |
| UTR3            | 1:220987340-220987356    |                 | 0.003119829 |
| ENST00000367701 | ENSG00000185278 (ZBTB37) | hsa-miR-146a-5p | 0.783595    |
| UTR3            | 1:173858183-173858200    |                 | 0.00228515  |
| UTR3            | 1:173858643-173858668    |                 | 0.001273208 |
| UTR3            | 1:173858801-173858821    |                 | 0.001397985 |
| UTR3            | 1:173863654-173863666    |                 | 0.001351184 |
| UTR3            | 1:173868348-173868364    |                 | 0.002863164 |
| UTR3            | 1:173869126-173869151    |                 | 0.001467548 |
| UTR3            | 1:173869489-173869507    |                 | 0.001791897 |
| UTR3            | 1:173870384-173870409    |                 | 0.004704759 |
| UTR3            | 1:173871031-173871044    |                 | 0.002600582 |
| UTR3            | 1:173871153-173871178    |                 | 0.001475049 |
| UTR3            | 1:173872248-173872261    |                 | 0.004746865 |
| UTR3            | 1:173872261-173872284    |                 | 0.005778841 |
| ENST00000374690 | ENSG00000169083 (AR)     | hsa-miR-146a-5p | 0.783528    |
| UTR3            | X:66944625-66944646      |                 | 0.004070186 |
| UTR3            | X:66944728-66944755      |                 | 0.001031808 |
| UTR3            | X:66944801-66944815      |                 | 0.001405671 |
| UTR3            | X:66945221-66945243      |                 | 0.00905965  |
| UTR3            | X:66945765-66945780      |                 | 0.001941879 |
| UTR3            | X:66946542-66946558      |                 | 0.001323751 |
| UTR3            | X:66947785-66947811      |                 | 0.006607271 |
| UTR3            | X:66950155-66950174      |                 | 0.00628956  |
| ENST00000295049 | ENSG00000162944 (RFTN2)  | hsa-miR-146a-5p | 0.783372    |
| UTR3            | 2:198436363-198436384    |                 | 0.028462722 |
| UTR3            | 2:198435002-198435024    |                 | 0.001580439 |
| UTR3            | 2:198434341-198434364    |                 | 0.001671552 |
| ENST00000339613 | ENSG00000124440 (HIF3A)  | hsa-miR-146a-5p | 0.782943    |
| UTR3            | 19:46843124-46843148     |                 | 0.014072197 |
| UTR3            | 19:46844388-46844406     |                 | 0.005290508 |
| UTR3            | 19:46844797-46844818     |                 | 0.007277617 |
| UTR3            | 19:46845234-46845256     |                 | 0.005033146 |
| ENST00000376621 | ENSG00000204590 (GNL1)   | hsa-miR-146a-5p | 0.782601    |
| UTR3            | 6:30513624-30513638      |                 | 0.016893899 |
| UTR3            | 6:30513602-30513626      |                 | 0.009393176 |
| UTR3            | 6:30513180-30513194      |                 | 0.005353484 |
| ENST00000262032 | ENSG00000123411 (IKZF4)  | hsa-miR-146a-5p | 0.782453    |
| UTR3            | 12:56429821-56429841     |                 | 0.019352813 |
| UTR3            | 12:56429961-56429989     |                 | 0.003664538 |
| UTR3            | 12:56430824-56430840     |                 | 0.002616798 |
| UTR3            | 12:56432046-56432064     |                 | 0.005992206 |
|                 | ENSG00000233863          |                 |             |
| ENST00000437887 | (AC012215.1)             | hsa-miR-146a-5p | 0.782242    |
| UTR3            | 8:35651347-35651363      |                 | 0.014314424 |
| UTR3            | 8:35651477-35651497      |                 | 0.006533456 |
| UTR3            | 8:35651765-35651788      |                 | 0.004819132 |

|                 |                           |                 |             |
|-----------------|---------------------------|-----------------|-------------|
| UTR3            | 8:35653295-35653318       |                 | 0.00593908  |
| ENST00000395076 | ENSG00000100614 (PPM1A)   | hsa-miR-146a-5p | 0.782121    |
| UTR3            | 14:60762033-60762052      |                 | 0.015023491 |
| UTR3            | 14:60762574-60762594      |                 | 0.001465463 |
| UTR3            | 14:60764246-60764273      |                 | 0.00232132  |
| UTR3            | 14:60765638-60765658      |                 | 0.009758521 |
| UTR3            | 14:60749598-60749618      |                 | 0.015951123 |
| ENST00000318833 | ENSG00000180787 (ZFP3)    | hsa-miR-146a-5p | 0.781574    |
| UTR3            | 17:4997401-4997421        |                 | 0.018422526 |
| UTR3            | 17:4998700-4998720        |                 | 0.002202589 |
| UTR3            | 17:4998930-4998951        |                 | 0.010916968 |
| ENST00000275493 | ENSG00000146648 (EGFR)    | hsa-miR-146a-5p | 0.781509    |
| UTR3            | 7:55274208-55274236       |                 | 0.00205656  |
| UTR3            | 7:55275853-55275868       |                 | 0.015314033 |
| UTR3            | 7:55276483-55276509       |                 | 0.005169866 |
| UTR3            | 7:55276553-55276571       |                 | 0.000579984 |
| UTR3            | 7:55277443-55277467       |                 | 0.005169352 |
| UTR3            | 7:55278271-55278296       |                 | 0.001655944 |
| UTR3            | 7:55278364-55278378       |                 | 0.001590065 |
|                 | ENSG00000080824           |                 |             |
| ENST00000554401 | (HSP90AA1)                | hsa-miR-146a-5p | 0.781425    |
| UTR3            | 14:102550143-102550158    |                 | 0.031527834 |
| ENST00000354631 | ENSG00000107614 (TRDMT1)  | hsa-miR-146a-5p | 0.78104     |
| UTR3            | 10:17190319-17190338      |                 | 0.001088942 |
| UTR3            | 10:17188624-17188641      |                 | 0.001974097 |
| UTR3            | 10:17187998-17188025      |                 | 0.004122753 |
| UTR3            | 10:17186587-17186598      |                 | 0.016369666 |
| UTR3            | 10:17186407-17186428      |                 | 0.002859177 |
| UTR3            | 10:17185776-17185803      |                 | 0.001777648 |
| UTR3            | 10:17185140-17185158      |                 | 0.003298698 |
| ENST00000290585 | ENSG00000159409 (CELF3)   | hsa-miR-146a-5p | 0.780985    |
| UTR3            | 1:151674963-151674989     |                 | 0.031485763 |
| ENST00000528670 | ENSG00000187240 (DYNC2H1) | hsa-miR-146a-5p | 0.780782    |
| UTR3            | 11:103194699-103194717    |                 | 0.031466326 |
| ENST00000359486 | ENSG00000100207 (TCF20)   | hsa-miR-146a-5p | 0.780637    |
| UTR3            | 22:42557229-42557256      |                 | 0.031452469 |
| ENST00000409284 | ENSG00000163492 (CCDC141) | hsa-miR-146a-5p | 0.780168    |
| UTR3            | 2:179742591-179742610     |                 | 0.012264997 |
| UTR3            | 2:179742576-179742589     |                 | 0.008793196 |
| UTR3            | 2:179741848-179741870     |                 | 0.001866353 |
| UTR3            | 2:179741261-179741284     |                 | 0.002349312 |
| UTR3            | 2:179741030-179741049     |                 | 0.001932964 |
| UTR3            | 2:179740787-179740806     |                 | 0.001562389 |
| UTR3            | 2:179739377-179739398     |                 | 0.002638566 |

|                 |                                       |                 |          |
|-----------------|---------------------------------------|-----------------|----------|
| ENST00000400085 | ENSG00000215343 (ZNF705D)             | hsa-miR-146a-5p | 0.779144 |
| UTR3            | 8:11971586-11971612                   | 0.002332187     |          |
| UTR3            | 8:11972070-11972092                   | 0.002494284     |          |
| UTR3            | 8:11972464-11972487                   | 0.024872516     |          |
| UTR3            | 8:11970378-11970405                   | 0.008775052     |          |
| ENST00000503808 | ENSG00000157426 (AASDH)               | hsa-miR-146a-5p | 0.779109 |
| UTR3            | 4:57237647-57237671                   | 0.004763025     |          |
| UTR3            | 4:57221466-57221485                   | 0.012582883     |          |
| UTR3            | 4:57216071-57216091                   | 0.002585563     |          |
| UTR3            | 4:57204944;57209001-57204957;57209014 | 0.011375552     |          |
| ENST00000374525 | ENSG00000241978 (AKAP2)               | hsa-miR-146a-5p | 0.778869 |
| UTR3            | 9:112932321-112932348                 | 0.003723278     |          |
| UTR3            | 9:112932886-112932911                 | 0.001645306     |          |
| UTR3            | 9:112932993-112933012                 | 0.000760435     |          |
| UTR3            | 9:112934143-112934165                 | 0.005426306     |          |
| UTR3            | 9:112934736-112934760                 | 0.015458723     |          |
| UTR3            | 9:112899870-112899894                 | 0.021564409     |          |
| ENST00000340652 | ENSG00000188730 (VWC2)                | hsa-miR-146a-5p | 0.778436 |
| UTR3            | 7:49952411-49952426                   | 0.003035178     |          |
| UTR3            | 7:49953587-49953615                   | 0.005558946     |          |
| UTR3            | 7:49955069-49955079                   | 0.001605012     |          |
| UTR3            | 7:49955659-49955677                   | 0.006608128     |          |
| UTR3            | 7:49957254-49957274                   | 0.002251633     |          |
| UTR3            | 7:49957730-49957744                   | 0.005225367     |          |
| UTR3            | 7:49958148-49958172                   | 0.001610643     |          |
| UTR3            | 7:49960181-49960209                   | 0.001545764     |          |
| UTR3            | 7:49960982-49960996                   | 0.003802536     |          |
| ENST00000423275 | ENSG00000132155 (RAF1)                | hsa-miR-146a-5p | 0.77825  |
| UTR3            | 3:12645783;12647700-12645788;12647716 | 0.019419684     |          |
| UTR3            | 3:12627217-12627234                   | 0.009805652     |          |
| UTR3            | 3:12626640-12626661                   | 0.002000189     |          |
| ENST00000374530 | ENSG00000157654 (PALM2-AKAP2)         | hsa-miR-146a-5p | 0.778177 |
| UTR3            | 9:112932321-112932348                 | 0.003769924     |          |
| UTR3            | 9:112932886-112932911                 | 0.001635708     |          |
| UTR3            | 9:112932993-112933012                 | 0.000759281     |          |
| UTR3            | 9:112934143-112934165                 | 0.005497444     |          |
| UTR3            | 9:112934736-112934760                 | 0.015377568     |          |
| UTR3            | 9:112899870-112899894                 | 0.021117441     |          |
| ENST00000240922 | ENSG00000121579 (NAA50)               | hsa-miR-146a-5p | 0.777265 |
| UTR3            | 3:113440212-113440234                 | 0.006491922     |          |
| UTR3            | 3:113439213-113439241                 | 0.006504448     |          |
| UTR3            | 3:113436536-113436556                 | 0.003578365     |          |
| UTR3            | 3:113436421-113436448                 | 0.00124722      |          |



|                 |                                           |                 |             |
|-----------------|-------------------------------------------|-----------------|-------------|
| UTR3            | 3:113436248-113436274                     |                 | 0.002170259 |
| UTR3            | 3:113436233-113436248                     |                 | 0.011140216 |
| ENST00000302103 | ENSG00000172461 (FUT9)                    | hsa-miR-146a-5p | 0.776879    |
| UTR3            | 6:96652702-96652726                       |                 | 0.003394851 |
| UTR3            | 6:96652740-96652765                       |                 | 0.003006036 |
| UTR3            | 6:96653800-96653816                       |                 | 0.001264878 |
| UTR3            | 6:96656844-96656858                       |                 | 0.001345893 |
| UTR3            | 6:96657138-96657158                       |                 | 0.001983625 |
| UTR3            | 6:96657842-96657861                       |                 | 0.009713825 |
| UTR3            | 6:96658413-96658436                       |                 | 0.004118123 |
| UTR3            | 6:96659746-96659770                       |                 | 0.002962461 |
| UTR3            | 6:96663163-96663178                       |                 | 0.0033063   |
| ENST00000295851 | ENSG00000138443 (ABI2)                    | hsa-miR-146a-5p | 0.776831    |
| UTR3            | 2:204292376-204292403                     |                 | 0.005363376 |
| UTR3            | 2:204295997-204296004                     |                 | 0.004177317 |
| UTR3            | 2:204297381-204297408                     |                 | 0.000959874 |
| UTR3            | 2:204299480-204299506                     |                 | 0.002076199 |
| UTR3            | 2:204301980-204302004                     |                 | 0.001881069 |
| UTR3            | 2:204303017-204303043                     |                 | 0.001005082 |
| UTR3            | 2:204303664-204303691                     |                 | 0.002065638 |
| UTR3            | 2:204307358-204307382                     |                 | 0.002656673 |
| UTR3            | 2:204307923-204307936                     |                 | 0.001737389 |
| UTR3            | 2:204310882-204310898                     |                 | 0.001032072 |
| UTR3            | 2:204311271-204311291                     |                 | 0.003130079 |
| UTR3            | 2:204311454-204311471                     |                 | 0.002610166 |
| UTR3            | 2:204312010-204312032                     |                 | 0.002396586 |
| ENST00000423760 | ENSG00000106443 (PHF14)                   | hsa-miR-146a-5p | 0.776225    |
| UTR3            | 7:11209201-11209224                       |                 | 0.031034444 |
| ENST00000462833 | ENSG00000173175 (ADCY5)                   | hsa-miR-146a-5p | 0.775935    |
| UTR3            | 3:123002783-123002789                     |                 | 0.005820464 |
| UTR3            | 3:123001748-123001772                     |                 | 0.005678369 |
| UTR3            | 3:123001455-123001471                     |                 | 0.014066476 |
| UTR3            | 3:123001357-123001380                     |                 | 0.002899947 |
| UTR3            | 3:123071410;123166259-123071428;123166260 |                 | 0.013361539 |
| ENST00000313349 | ENSG00000179833 (SERTAD2)                 | hsa-miR-146a-5p | 0.775828    |
| UTR3            | 2:64862995-64863010                       |                 | 0.017793496 |
| UTR3            | 2:64862070-64862095                       |                 | 0.003950069 |
| UTR3            | 2:64860915-64860939                       |                 | 0.003986255 |
| UTR3            | 2:64860483-64860499                       |                 | 0.002580131 |
| UTR3            | 2:64859848-64859871                       |                 | 0.002687118 |
| ENST00000380607 | ENSG00000107295 (SH3GL2)                  | hsa-miR-146a-5p | 0.775498    |
| UTR3            | 9:17795989-17796011                       |                 | 0.030966068 |
| ENST00000233202 | ENSG00000018280 (SLC11A1)                 | hsa-miR-146a-5p | 0.775257    |
| UTR3            | 2:219261589-219261613                     |                 | 0.030943462 |

|                 |                            |                 |          |
|-----------------|----------------------------|-----------------|----------|
| ENST00000529131 | ENSG00000204711 (C9orf135) | hsa-miR-146a-5p | 0.774777 |
| UTR3            | 9:72520899-72520922        | 0.030898469     |          |
| ENST00000413659 | ENSG00000128815 (WDFY4)    | hsa-miR-146a-5p | 0.774634 |
| UTR3            | 10:50030518-50030534       | 0.001465835     |          |
|                 | 10:50030578;50034716-      |                 |          |
| UTR3            | 50030582;50034738          | 0.001758598     |          |
| UTR3            | 10:50034816-50034842       | 0.000798382     |          |
| UTR3            | 10:50083137-50083165       | 0.002852473     |          |
| UTR3            | 10:50098626-50098640       | 0.003035366     |          |
| UTR3            | 10:50190713-50190740       | 0.020974431     |          |
| ENST00000306829 | ENSG00000171914 (TLN2)     | hsa-miR-146a-5p | 0.77436  |
| UTR3            | 15:63132929-63132949       | 0.007240556     |          |
| UTR3            | 15:63133097-63133119       | 0.016735288     |          |
| UTR3            | 15:63135024-63135046       | 0.004436258     |          |
| UTR3            | 15:63135388-63135403       | 0.00106223      |          |
| UTR3            | 15:63135803-63135829       | 0.001385116     |          |
| ENST00000503275 | ENSG00000069018 (TRPC7)    | hsa-miR-146a-5p | 0.774283 |
| UTR3            | 5:135601943-135601957      | 0.024018092     |          |
| UTR3            | 5:135567126-135567143      | 0.006834178     |          |
| ENST00000310903 | ENSG00000174527 (MYO1H)    | hsa-miR-146a-5p | 0.773657 |
| UTR3            | 12:109885343-109885362     | 0.02773355      |          |
| UTR3            | 12:109885417-109885440     | 0.003060225     |          |
| ENST00000360409 | ENSG00000118257 (NRP2)     | hsa-miR-146a-5p | 0.773651 |
| UTR3            | 2:206659997-206660023      | 0.00415494      |          |
| UTR3            | 2:206660728-206660756      | 0.00210191      |          |
| UTR3            | 2:206660787-206660804      | 0.000942388     |          |
| UTR3            | 2:206661760-206661783      | 0.006703829     |          |
| UTR3            | 2:206662129-206662147      | 0.016890144     |          |
| ENST00000447079 | ENSG00000167258 (CDK12)    | hsa-miR-146a-5p | 0.773512 |
| UTR3            | 17:37687606-37687628       | 0.012027335     |          |
| UTR3            | 17:37688511-37688537       | 0.008469247     |          |
| UTR3            | 17:37689062-37689082       | 0.001760164     |          |
| UTR3            | 17:37690884-37690898       | 0.005073362     |          |
| UTR3            | 17:37682424-37682448       | 0.017573589     |          |
| ENST00000360264 | ENSG00000257923 (CUX1)     | hsa-miR-146a-5p | 0.773137 |
| UTR3            | 7:101900512-101900534      | 0.002641667     |          |
| UTR3            | 7:101901365-101901386      | 0.027407677     |          |
| UTR3            | 7:101840024-101840047      | 0.003828768     |          |
| ENST00000334295 | ENSG00000134779 (TPGS2)    | hsa-miR-146a-5p | 0.77267  |
| UTR3            | 18:34374350-34374365       | 0.02477679      |          |
| UTR3            | 18:34374141-34374158       | 0.00592502      |          |
| ENST00000359660 | ENSG00000145743 (FBXL17)   | hsa-miR-146a-5p | 0.772496 |
| UTR3            | 5:107196335-107196354      | 0.013389599     |          |
| UTR3            | 5:107195034-107195061      | 0.017295973     |          |
| ENST00000339249 | ENSG00000173275 (ZNF449)   | hsa-miR-146a-5p | 0.772179 |
| UTR3            | X:134496188-134496201      | 0.002674348     |          |

|                 |                               |                 |             |
|-----------------|-------------------------------|-----------------|-------------|
| UTR3            | X:134496309-134496322         |                 | 0.002778763 |
| UTR3            | X:134496368-134496386         |                 | 0.012707382 |
| UTR3            | X:134496412-134496435         |                 | 0.002153008 |
| UTR3            | X:134496590-134496605         |                 | 0.010342594 |
| ENST00000271411 | ENSG00000143190 (POU2F1)      | hsa-miR-146a-5p | 0.771974    |
| UTR3            | 1:167386118-167386136         |                 | 0.003169494 |
| UTR3            | 1:167386426-167386450         |                 | 0.001564091 |
| UTR3            | 1:167387788-167387809         |                 | 0.001751984 |
| UTR3            | 1:167388800-167388820         |                 | 0.002342305 |
| UTR3            | 1:167390092-167390113         |                 | 0.001645663 |
| UTR3            | 1:167390388-167390404         |                 | 0.001148715 |
| UTR3            | 1:167390656-167390682         |                 | 0.001733045 |
| UTR3            | 1:167390875-167390889         |                 | 0.001823769 |
| UTR3            | 1:167391641-167391660         |                 | 0.001729229 |
| UTR3            | 1:167393062-167393082         |                 | 0.013728812 |
| ENST00000510994 | ENSG00000129055 (ANAPC13)     | hsa-miR-146a-5p | 0.771533    |
| UTR3            | 3:134197398-134197417         |                 | 0.003827852 |
| UTR3            | 3:134197257-134197277         |                 | 0.00407199  |
| UTR3            | 3:134197032-134197058         |                 | 0.005429311 |
| UTR3            | 3:134196864-134196881         |                 | 0.004364537 |
| UTR3            | 3:134196787-134196814         |                 | 0.003293384 |
| UTR3            | 3:134196645-134196665         |                 | 0.003467471 |
| UTR3            | 3:134196555-134196582         |                 | 0.006141597 |
| ENST00000260526 | ENSG00000137962<br>(ARHGAP29) | hsa-miR-146a-5p | 0.771282    |
| UTR3            | 1:94637384-94637399           |                 | 0.02868194  |
| UTR3            | 1:94697001-94697013           |                 | 0.010000997 |
| ENST00000263102 | ENSG00000108091 (CCDC6)       | hsa-miR-146a-5p | 0.771099    |
| UTR3            | 10:61551788-61551813          |                 | 0.002892418 |
| UTR3            | 10:61550926-61550942          |                 | 0.017144803 |
| UTR3            | 10:61550748-61550765          |                 | 0.010518693 |
| ENST00000559291 | ENSG00000128891 (C15orf57)    | hsa-miR-146a-5p | 0.770473    |
| UTR3            | 15:40829192-40829212          |                 | 0.002180053 |
| UTR3            | 15:40829057-40829075          |                 | 0.00107606  |
| UTR3            | 15:40826901-40826916          |                 | 0.007526304 |
| UTR3            | 15:40826715-40826734          |                 | 0.019715589 |
| ENST00000264434 | ENSG00000115998 (C2orf42)     | hsa-miR-146a-5p | 0.770391    |
| UTR3            | 2:70377356-70377375           |                 | 0.005871769 |
| UTR3            | 2:70377046-70377070           |                 | 0.024618661 |
| ENST00000367975 | ENSG00000143252 (SDHC)        | hsa-miR-146a-5p | 0.770355    |
| UTR3            | 1:161332297-161332317         |                 | 0.025312837 |
| UTR3            | 1:161332903-161332927         |                 | 0.00517426  |

|                 |                           |                 |          |
|-----------------|---------------------------|-----------------|----------|
| ENST00000426126 | ENSG00000186908 (ZDHHC17) | hsa-miR-146a-5p | 0.770253 |
| UTR3            | 12:77244820-77244834      | 0.002807948     |          |
| UTR3            | 12:77245020-77245044      | 0.019001805     |          |
| UTR3            | 12:77245630-77245651      | 0.003611749     |          |
| UTR3            | 12:77245664-77245691      | 0.001341103     |          |
| UTR3            | 12:77247165-77247187      | 0.003715118     |          |
| ENST00000335397 | ENSG00000186509 (OR9Q1)   | hsa-miR-146a-5p | 0.769706 |
| UTR3            | 11:57948511-57948529      | 0.020071187     |          |
| UTR3            | 11:57948623-57948638      | 0.010356075     |          |
| ENST00000570137 | ENSG00000166446 (CDYL2)   | hsa-miR-146a-5p | 0.769505 |
| UTR3            | 16:80637360-80637382      | 0.005581081     |          |
| UTR3            | 16:80636505-80636523      | 0.005913208     |          |
| UTR3            | 16:80635053-80635071      | 0.001199073     |          |
| UTR3            | 16:80634868-80634884      | 0.002013479     |          |
| UTR3            | 16:80633965-80633978      | 0.002244725     |          |
| UTR3            | 16:80632358-80632384      | 0.008829571     |          |
| UTR3            | 16:80632031-80632042      | 0.004627559     |          |
| ENST00000392837 | ENSG00000111785 (RIC8B)   | hsa-miR-146a-5p | 0.769218 |
| UTR3            | 12:107280432-107280448    | 0.017400079     |          |
| UTR3            | 12:107236394-107236419    | 0.021152499     |          |
| UTR3            | 12:107237647-107237666    | 0.030868985     |          |
| ENST00000452722 | ENSG00000182985 (CADM1)   | hsa-miR-146a-5p | 0.769147 |
| UTR3            | 11:115046172-115046192    | 0.003246481     |          |
| UTR3            | 11:115045929-115045942    | 0.008070384     |          |
| UTR3            | 11:115045900-115045913    | 0.003804404     |          |
| UTR3            | 11:115044149-115044173    | 0.002383755     |          |
| UTR3            | 11:115043879-115043893    | 0.004582884     |          |
| UTR3            | 11:115043810-115043830    | 0.002685952     |          |
| UTR3            | 11:115040828-115040841    | 0.005601838     |          |
| ENST00000361905 | ENSG00000187079 (TEAD1)   | hsa-miR-146a-5p | 0.768991 |
| UTR3            | 11:12959157-12959175      | 0.022237818     |          |
| UTR3            | 11:12964780-12964807      | 0.001822843     |          |
| UTR3            | 11:12965610-12965627      | 0.00316793      |          |
| UTR3            | 11:12965790-12965805      | 0.003132832     |          |
| ENST00000403299 | ENSG00000100065 (CARD10)  | hsa-miR-146a-5p | 0.768959 |
| UTR3            | 22:37886884-37886902      | 0.004705371     |          |
| UTR3            | 22:37886850-37886876      | 0.018775482     |          |
| UTR3            | 22:37886636-37886658      | 0.006877565     |          |
| ENST00000205636 | ENSG00000091317 (CMTM6)   | hsa-miR-146a-5p | 0.768325 |
| UTR3            | 3:32523859-32523884       | 0.002210182     |          |
| UTR3            | 3:32523798-32523816       | 0.005038224     |          |
| UTR3            | 3:32523008-32523024       | 0.022052681     |          |
| UTR3            | 3:32544114-32544136       | 0.005378228     |          |
| ENST00000376447 | ENSG00000165105 (RASEF)   | hsa-miR-146a-5p | 0.768037 |
| UTR3            | 9:85597173-85597182       | 0.004214675     |          |

|                 |                          |                 |             |
|-----------------|--------------------------|-----------------|-------------|
| UTR3            | 9:85596948-85596972      |                 | 0.005809627 |
| UTR3            | 9:85595194-85595211      |                 | 0.020249421 |
| ENST00000525508 | ENSG00000171316 (CHD7)   | hsa-miR-146a-5p | 0.76792     |
| UTR3            | 8:61736940-61736965      |                 | 0.003791536 |
| UTR3            | 8:61737175-61737196      |                 | 0.024979303 |
| UTR3            | 8:61654855-61654875      |                 | 0.007911839 |
| ENST00000297354 | ENSG00000164764 (SBSPON) | hsa-miR-146a-5p | 0.767572    |
| UTR3            | 8:73979524-73979539      |                 | 0.004612662 |
| UTR3            | 8:73979420-73979439      |                 | 0.025618414 |
| ENST00000400075 | ENSG00000154727 (GABPA)  | hsa-miR-146a-5p | 0.767181    |
| UTR3            | 21:27141970-27141991     |                 | 0.002700943 |
| UTR3            | 21:27142879-27142903     |                 | 0.002017218 |
| UTR3            | 21:27143164-27143173     |                 | 0.00604562  |
| UTR3            | 21:27143610-27143634     |                 | 0.002136727 |
| UTR3            | 21:27143700-27143715     |                 | 0.001637223 |
| UTR3            | 21:27143712-27143739     |                 | 0.007859008 |
| UTR3            | 21:27144531-27144551     |                 | 0.007798559 |
| ENST00000466490 | ENSG00000144867 (SRPRB)  | hsa-miR-146a-5p | 0.766872    |
| UTR3            | 3:133538784-133538795    |                 | 0.016196474 |
| UTR3            | 3:133539445-133539464    |                 | 0.008554979 |
| UTR3            | 3:133539831-133539857    |                 | 0.005415562 |
| ENST00000591604 | ENSG00000167383 (ZNF229) | hsa-miR-146a-5p | 0.766841    |
| UTR3            | 19:44934554-44934577     |                 | 0.01118548  |
| UTR3            | 19:44933356-44933371     |                 | 0.001191958 |
| UTR3            | 19:44933023-44933038     |                 | 0.001578209 |
| UTR3            | 19:44931957-44931973     |                 | 0.003030857 |
| UTR3            | 19:44931274-44931288     |                 | 0.005287492 |
| UTR3            | 19:44931258-44931277     |                 | 0.007890238 |
| ENST00000474541 | ENSG00000135747 (ZNF670) | hsa-miR-146a-5p | 0.766534    |
| UTR3            | 1:247132707-247132728    |                 | 0.006414973 |
| UTR3            | 1:247131172-247131187    |                 | 0.006195642 |
| UTR3            | 1:247131155-247131175    |                 | 0.017525545 |
| ENST00000366862 | ENSG00000143756 (FBXO28) | hsa-miR-146a-5p | 0.765962    |
| UTR3            | 1:224346067-224346082    |                 | 0.017228917 |
| UTR3            | 1:224347277-224347299    |                 | 0.000736263 |
| UTR3            | 1:224348852-224348871    |                 | 0.010053088 |
| UTR3            | 1:224345149-224345176    |                 | 0.010723444 |
| ENST00000479862 | ENSG00000165078 (CPA6)   | hsa-miR-146a-5p | 0.76581     |
| UTR3            | 8:68421795-68421819      |                 | 0.008134097 |
| UTR3            | 8:68334368-68334391      |                 | 0.021936041 |
| ENST00000351193 | ENSG00000169251 (NMD3)   | hsa-miR-146a-5p | 0.765506    |
| UTR3            | 3:160969991-160970008    |                 | 0.030042383 |
| ENST00000309964 | ENSG00000134852 (CLOCK)  | hsa-miR-146a-5p | 0.765352    |
| UTR3            | 4:56298619-56298636      |                 | 0.001790034 |
| UTR3            | 4:56296279-56296286      |                 | 0.005757977 |

|                 |                            |                 |             |
|-----------------|----------------------------|-----------------|-------------|
| UTR3            | 4:56296207-56296228        |                 | 0.000719194 |
| UTR3            | 4:56294864-56294878        |                 | 0.007946682 |
| UTR3            | 4:56294583-56294600        |                 | 0.004444244 |
| UTR3            | 4:56345078-56345102        |                 | 0.040373706 |
| ENST00000296755 | ENSG00000131711 (MAP1B)    | hsa-miR-146a-5p | 0.765075    |
| UTR3            | 5:71501200-71501228        |                 | 0.006459613 |
| UTR3            | 5:71501564-71501591        |                 | 0.003555071 |
| UTR3            | 5:71502309-71502333        |                 | 0.005129667 |
| UTR3            | 5:71502492-71502516        |                 | 0.001856105 |
| UTR3            | 5:71502884-71502899        |                 | 0.001588414 |
| UTR3            | 5:71503898-71503911        |                 | 0.005895966 |
| UTR3            | 5:71504300-71504322        |                 | 0.002173042 |
| UTR3            | 5:71504331-71504351        |                 | 0.001220931 |
| UTR3            | 5:71493627-71493642        |                 | 0.010985216 |
| ENST00000383699 | ENSG00000175161 (CADM2)    | hsa-miR-146a-5p | 0.764683    |
| UTR3            | 3:86117484-86117493        |                 | 0.022375851 |
| UTR3            | 3:86120669-86120680        |                 | 0.00410935  |
| UTR3            | 3:86010761-86010788        |                 | 0.017337678 |
| ENST00000318709 | ENSG00000105778 (AVL9)     | hsa-miR-146a-5p | 0.764284    |
| UTR3            | 7:32625069-32625087        |                 | 0.001983241 |
| UTR3            | 7:32627371-32627391        |                 | 0.002142464 |
| UTR3            | 7:32627737-32627764        |                 | 0.007831366 |
| UTR3            | 7:32628146-32628162        |                 | 0.01352906  |
| UTR3            | 7:32598552-32598574        |                 | 0.009457523 |
| UTR3            | 7:32619864-32619882        |                 | 0.012099581 |
| ENST00000298573 | ENSG00000111266 (DUSP16)   | hsa-miR-146a-5p | 0.76421     |
| UTR3            | 12:12630428-12630444       |                 | 0.02992465  |
| ENST00000314099 | ENSG00000236761 (CTAGE9)   | hsa-miR-146a-5p | 0.764028    |
| UTR3            | 6:132029649-132029672      |                 | 0.004437528 |
| UTR3            | 6:132029619-132029636      |                 | 0.025470596 |
| ENST00000261486 | ENSG00000129595 (EPB41L4A) | hsa-miR-146a-5p | 0.763539    |
| UTR3            | 5:111500009-111500030      |                 | 0.010721261 |
| UTR3            | 5:111499642-111499657      |                 | 0.006677655 |
| UTR3            | 5:111498489-111498512      |                 | 0.00431172  |
| UTR3            | 5:111498361-111498379      |                 | 0.006591148 |
| UTR3            | 5:111504703-111504727      |                 | 0.008173174 |
| ENST00000265350 | ENSG00000124641 (MED20)    | hsa-miR-146a-5p | 0.762941    |
| UTR3            | 6:41874680-41874700        |                 | 0.005563161 |
| UTR3            | 6:41874150-41874172        |                 | 0.002774452 |
| UTR3            | 6:41873578-41873605        |                 | 0.008642528 |
| UTR3            | 6:41873177-41873204        |                 | 0.012829648 |
| ENST00000514215 | ENSG00000198780 (FAM169A)  | hsa-miR-146a-5p | 0.762843    |

|                 |                           |                 |             |
|-----------------|---------------------------|-----------------|-------------|
|                 | 5:74100421;74100981-      |                 |             |
| UTR3            | 74100430;74100994         |                 | 0.008306232 |
| UTR3            | 5:74096756-74096778       |                 | 0.021494683 |
| ENST00000379261 | ENSG00000048740 (CELF2)   | hsa-miR-146a-5p | 0.762791    |
| UTR3            | 10:11371947-11371964      |                 | 0.016522875 |
| UTR3            | 10:11372517-11372540      |                 | 0.004760932 |
| UTR3            | 10:11372929-11372956      |                 | 0.00319109  |
| UTR3            | 10:11374027-11374044      |                 | 0.001819461 |
| UTR3            | 10:11376812-11376831      |                 | 0.003501888 |
| ENST00000174653 | ENSG00000070718 (AP3M2)   | hsa-miR-146a-5p | 0.762791    |
| UTR3            | 8:42026774-42026795       |                 | 0.027522974 |
| UTR3            | 8:42028297-42028311       |                 | 0.002273209 |
| ENST00000216218 | ENSG00000100380 (ST13)    | hsa-miR-146a-5p | 0.762736    |
| UTR3            | 22:41222443-41222467      |                 | 0.008692053 |
| UTR3            | 22:41221845-41221861      |                 | 0.008197398 |
| UTR3            | 22:41220743-41220757      |                 | 0.012901748 |
| ENST00000318445 | ENSG00000176463 (SLCO3A1) | hsa-miR-146a-5p | 0.762733    |
| UTR3            | 15:92706501-92706524      |                 | 0.004750478 |
| UTR3            | 15:92706967-92706993      |                 | 0.007251796 |
| UTR3            | 15:92707355-92707381      |                 | 0.008253502 |
| UTR3            | 15:92708521-92708541      |                 | 0.003637618 |
| UTR3            | 15:92708930-92708940      |                 | 0.005897565 |
| ENST00000582730 | ENSG00000136450 (SRSF1)   | hsa-miR-146a-5p | 0.761149    |
| UTR3            | 17:56082720-56082742      |                 | 0.029648254 |
| ENST00000371130 | ENSG00000009694 (TENM1)   | hsa-miR-146a-5p | 0.760123    |
| UTR3            | X:123514056-123514069     |                 | 0.006382576 |
| UTR3            | X:123513573-123513593     |                 | 0.003763372 |
| UTR3            | X:123513108-123513123     |                 | 0.002056295 |
| UTR3            | X:123511629-123511645     |                 | 0.002181726 |
| UTR3            | X:123510127-123510153     |                 | 0.009697181 |
| UTR3            | X:123509935-123509960     |                 | 0.005474987 |
| ENST00000263707 | ENSG00000115112 (TFCP2L1) | hsa-miR-146a-5p | 0.760116    |
| UTR3            | 2:121981394-121981421     |                 | 0.003622276 |
| UTR3            | 2:121981199-121981222     |                 | 0.001821588 |
| UTR3            | 2:121979406-121979421     |                 | 0.001446493 |
| UTR3            | 2:121979205-121979222     |                 | 0.015964871 |
| UTR3            | 2:121978599-121978622     |                 | 0.002118843 |
| UTR3            | 2:121974472-121974496     |                 | 0.004581412 |
| ENST00000298875 | ENSG00000165934 (CPSF2)   | hsa-miR-146a-5p | 0.760062    |
| UTR3            | 14:92628335-92628362      |                 | 0.003329643 |
| UTR3            | 14:92629217-92629237      |                 | 0.002273503 |
| UTR3            | 14:92630026-92630045      |                 | 0.013586247 |
| UTR3            | 14:92630744-92630749      |                 | 0.007492676 |
| UTR3            | 14:92627498-92627518      |                 | 0.014357651 |

|                 |                           |                 |          |
|-----------------|---------------------------|-----------------|----------|
| ENST00000441159 | ENSG00000170379 (FAM115C) | hsa-miR-146a-5p | 0.759974 |
| UTR3            | 7:143425075-143425102     | 0.003722528     |          |
| UTR3            | 7:143425885-143425910     | 0.011081892     |          |
| UTR3            | 7:143426895-143426915     | 0.012499141     |          |
| UTR3            | 7:143424599-143424621     | 0.011397659     |          |
| ENST00000540438 | ENSG00000048028 (USP28)   | hsa-miR-146a-5p | 0.759736 |
| UTR3            | 11:113705018-113705043    | 0.027787795     |          |
| UTR3            | 11:113679138-113679159    | 0.001733644     |          |
| ENST00000436063 | ENSG00000067334 (DNMTIP2) | hsa-miR-146a-5p | 0.759614 |
| UTR3            | 1:94334358-94334371       | 0.006715639     |          |
| UTR3            | 1:94333924-94333950       | 0.008077036     |          |
| UTR3            | 1:94333391-94333406       | 0.005787435     |          |
| UTR3            | 1:94342535-94342555       | 0.019135182     |          |
| UTR3            | 1:94342155-94342176       | 0.019274125     |          |
| ENST00000398637 | ENSG00000111371 (SLC38A1) | hsa-miR-146a-5p | 0.759425 |
| UTR3            | 12:46582079-46582096      | 0.007047058     |          |
| UTR3            | 12:46580082-46580109      | 0.002686922     |          |
| UTR3            | 12:46579055-46579082      | 0.004838594     |          |
| UTR3            | 12:46578503-46578522      | 0.00589066      |          |
| UTR3            | 12:46577625-46577643      | 0.009030371     |          |
| ENST00000295414 | ENSG00000163249 (CCNYL1)  | hsa-miR-146a-5p | 0.759338 |
| UTR3            | 2:208619125-208619145     | 0.005154687     |          |
| UTR3            | 2:208620530-208620553     | 0.011602643     |          |
| UTR3            | 2:208620557-208620585     | 0.007151993     |          |
| UTR3            | 2:208620835-208620858     | 0.005576515     |          |
| ENST00000260116 | ENSG00000137561 (TTPA)    | hsa-miR-146a-5p | 0.758924 |
| UTR3            | 8:63973471-63973494       | 0.009641321     |          |
| UTR3            | 8:63972855-63972878       | 0.005309769     |          |
| UTR3            | 8:63972369-63972382       | 0.014497751     |          |
| ENST00000526446 | ENSG00000110717 (NDUFS8)  | hsa-miR-146a-5p | 0.75879  |
|                 | 11:67803849;67803929-     |                 |          |
| UTR3            | 67803848;67803948         | 0.029436872     |          |
| ENST00000373119 | ENSG00000102271 (KLHL4)   | hsa-miR-146a-5p | 0.758157 |
| UTR3            | X:86922332-86922355       | 0.003776051     |          |
| UTR3            | X:86923385-86923403       | 0.001790437     |          |
| UTR3            | X:86923823-86923849       | 0.001176489     |          |
| UTR3            | X:86924536-86924561       | 0.020868275     |          |
|                 | X:86869039;86869437-      |                 |          |
| UTR3            | 86869047;86869447         | 0.009081191     |          |
| ENST00000367139 | ENSG00000117280 (RAB7L1)  | hsa-miR-146a-5p | 0.757968 |
| UTR3            | 1:205739222-205739246     | 0.003194221     |          |
| UTR3            | 1:205739143-205739170     | 0.005060097     |          |
| UTR3            | 1:205737268-205737288     | 0.021109211     |          |



|                 |                           |                 |          |
|-----------------|---------------------------|-----------------|----------|
| ENST00000439211 | ENSG00000228716 (DHFR)    | hsa-miR-146a-5p | 0.757713 |
| UTR3            | 5:79924269-79924289       | 0.009728971     |          |
| UTR3            | 5:79922591-79922618       | 0.004227688     |          |
| UTR3            | 5:79945221-79945243       | 0.05740097      |          |
| ENST00000369872 | ENSG00000143028 (SYPL2)   | hsa-miR-146a-5p | 0.757569 |
| UTR3            | 1:110023279-110023306     | 0.00244687      |          |
| UTR3            | 1:110024141-110024159     | 0.011675509     |          |
| UTR3            | 1:110024274-110024295     | 0.002567821     |          |
| UTR3            | 1:110024284-110024305     | 0.002726834     |          |
| UTR3            | 1:110024302-110024323     | 0.004494673     |          |
| UTR3            | 1:110024429-110024450     | 0.002352395     |          |
| UTR3            | 1:110009723-110009749     | 0.015165148     |          |
|                 | ENSG00000253896           |                 |          |
| ENST00000522481 | (AC144568.2)              | hsa-miR-146a-5p | 0.757464 |
| UTR3            | 8:29334-29354             | 0.013698895     |          |
| UTR3            | 8:29354-29373             | 0.015619784     |          |
| ENST00000325203 | ENSG00000091879 (ANGPT2)  | hsa-miR-146a-5p | 0.7574   |
| UTR3            | 8:6359662-6359679         | 0.002561476     |          |
| UTR3            | 8:6358925-6358944         | 0.002050293     |          |
| UTR3            | 8:6357701-6357719         | 0.004387123     |          |
| UTR3            | 8:6357623-6357642         | 0.008625816     |          |
| UTR3            | 8:6357611-6357626         | 0.002804885     |          |
| UTR3            | 8:6357246-6357274         | 0.008883437     |          |
| ENST00000453304 | ENSG00000182168 (UNC5C)   | hsa-miR-146a-5p | 0.757177 |
| UTR3            | 4:96089287-96089305       | 0.002649601     |          |
| UTR3            | 4:96089165-96089184       | 0.010211895     |          |
| UTR3            | 4:96087123-96087145       | 0.002763001     |          |
| UTR3            | 4:96086624-96086648       | 0.002838777     |          |
| UTR3            | 4:96084508-96084530       | 0.010829923     |          |
| ENST00000335144 | ENSG00000186767 (SPIN4)   | hsa-miR-146a-5p | 0.756801 |
| UTR3            | X:62569888-62569910       | 0.005433099     |          |
| UTR3            | X:62569487-62569504       | 0.004369167     |          |
| UTR3            | X:62568189-62568205       | 0.003123306     |          |
| UTR3            | X:62567237-62567259       | 0.016334205     |          |
| ENST00000380003 | ENSG00000147894 (C9orf72) | hsa-miR-146a-5p | 0.756728 |
| UTR3            | 9:27548091-27548099       | 0.017175663     |          |
| UTR3            | 9:27547624-27547639       | 0.01207765      |          |
| ENST00000223129 | ENSG00000106399 (RPA3)    | hsa-miR-146a-5p | 0.756577 |
| UTR3            | 7:7676536-7676558         | 0.004849317     |          |
| UTR3            | 7:7676465-7676491         | 0.024390549     |          |
| ENST00000295797 | ENSG00000163558 (PRKCI)   | hsa-miR-146a-5p | 0.756071 |
| UTR3            | 3:170022965-170022985     | 0.029195047     |          |
| ENST00000381813 | ENSG00000205795 (CYS1)    | hsa-miR-146a-5p | 0.756053 |
| UTR3            | 2:10198494-10198518       | 0.003994981     |          |
| UTR3            | 2:10198127-10198151       | 0.005865746     |          |

|                 |                           |                 |             |
|-----------------|---------------------------|-----------------|-------------|
| UTR3            | 2:10197049-10197068       |                 | 0.019332654 |
| ENST00000597832 | ENSG00000204514 (ZNF814)  | hsa-miR-146a-5p | 0.755801    |
| UTR3            | 19:58363262-58363276      |                 | 0.001903635 |
| UTR3            | 19:58362197-58362221      |                 | 0.027267472 |
| ENST00000324472 | ENSG00000177990 (DPY19L2) | hsa-miR-146a-5p | 0.755702    |
| UTR3            | 12:63953628-63953643      |                 | 0.011652718 |
| UTR3            | 12:63953062-63953088      |                 | 0.017509614 |
| ENST00000433351 | ENSG00000116005 (PCYOX1)  | hsa-miR-146a-5p | 0.755523    |
| UTR3            | 2:70504909-70504925       |                 | 0.002300138 |
| UTR3            | 2:70505560-70505587       |                 | 0.001907555 |
| UTR3            | 2:70505578-70505593       |                 | 0.005297891 |
| UTR3            | 2:70507812-70507838       |                 | 0.01964091  |
| ENST00000554557 | ENSG00000072121 (ZFYVE26) | hsa-miR-146a-5p | 0.755157    |
| UTR3            | 14:68265239-68265261      |                 | 0.005809706 |
| UTR3            | 14:68265229-68265257      |                 | 0.003937823 |
| UTR3            | 14:68260386-68260399      |                 | 0.005732104 |
| UTR3            | 14:68251801-68251818      |                 | 0.007379659 |
| UTR3            | 14:68241750-68241766      |                 | 0.004531334 |
| UTR3            | 14:68228088-68228116      |                 | 0.001723477 |
| ENST00000371244 | ENSG00000162409 (PRKAA2)  | hsa-miR-146a-5p | 0.754761    |
| UTR3            | 1:57174170-57174179       |                 | 0.003890047 |
| UTR3            | 1:57175233-57175254       |                 | 0.001561101 |
| UTR3            | 1:57176616-57176642       |                 | 0.001765876 |
| UTR3            | 1:57177251-57177277       |                 | 0.001804601 |
| UTR3            | 1:57177313-57177336       |                 | 0.009836895 |
| UTR3            | 1:57179625-57179638       |                 | 0.008094142 |
| UTR3            | 1:57179796-57179815       |                 | 0.002126449 |
| ENST00000530414 | ENSG00000109832 (DDX25)   | hsa-miR-146a-5p | 0.754516    |
| UTR3            | 11:125791921-125791946    |                 | 0.023297503 |
| UTR3            | 11:125788641-125788661    |                 | 0.026429259 |
| ENST00000370630 | ENSG00000117151 (CTBS)    | hsa-miR-146a-5p | 0.754448    |
| UTR3            | 1:85020137-85020161       |                 | 0.00411006  |
| UTR3            | 1:85019638-85019651       |                 | 0.007650105 |
| UTR3            | 1:85018719-85018742       |                 | 0.002893908 |
| UTR3            | 1:85018396-85018410       |                 | 0.004845695 |
| UTR3            | 1:85017717-85017743       |                 | 0.001990105 |
| UTR3            | 1:85016901-85016922       |                 | 0.007561616 |
| ENST00000318876 | ENSG00000165861 (ZFYVE1)  | hsa-miR-146a-5p | 0.754165    |
| UTR3            | 14:73437546-73437572      |                 | 0.029026544 |
| ENST00000403491 | ENSG00000162599 (NFIA)    | hsa-miR-146a-5p | 0.754079    |
| UTR3            | 1:61921023-61921042       |                 | 0.010774161 |
| UTR3            | 1:61921212-61921229       |                 | 0.007812039 |
| UTR3            | 1:61927584-61927596       |                 | 0.003296429 |

|                 |                            |                 |             |
|-----------------|----------------------------|-----------------|-------------|
| UTR3            | 1:61928357-61928381        |                 | 0.007136307 |
| ENST00000377252 | ENSG00000120594 (PLXDC2)   | hsa-miR-146a-5p | 0.753652    |
| UTR3            | 10:20569122-20569142       |                 | 0.005014655 |
| UTR3            | 10:20570889-20570912       |                 | 0.001684768 |
| UTR3            | 10:20573636-20573661       |                 | 0.01104128  |
| UTR3            | 10:20575402-20575424       |                 | 0.001111703 |
| UTR3            | 10:20578395-20578408       |                 | 0.007044237 |
| UTR3            | 10:20578430-20578457       |                 | 0.003084747 |
| ENST00000254442 | ENSG00000091157 (WDR7)     | hsa-miR-146a-5p | 0.753567    |
| UTR3            | 18:54694454-54694475       |                 | 0.018427013 |
| UTR3            | 18:54694577-54694594       |                 | 0.002844227 |
| UTR3            | 18:54696698-54696715       |                 | 0.001362395 |
| UTR3            | 18:54697017-54697037       |                 | 0.001856904 |
|                 | 18:54348616;54349910-      |                 |             |
| UTR3            | 54348622;54349923          |                 | 0.012922063 |
| UTR3            | 18:54424026-54424050       |                 | 0.008271206 |
|                 | ENSG00000272195 (RP11-     |                 |             |
| ENST00000607453 | 156E8.1)                   | hsa-miR-146a-5p | 0.753512    |
| UTR3            | 1:245132902-245132920      |                 | 0.028969012 |
| ENST00000317568 | ENSG00000126391 (FRMD8)    | hsa-miR-146a-5p | 0.753354    |
| UTR3            | 11:65180335-65180359       |                 | 0.006687249 |
| UTR3            | 11:65180932-65180953       |                 | 0.022267852 |
| ENST00000391736 | ENSG00000186818 (LILRB4)   | hsa-miR-146a-5p | 0.753108    |
| UTR3            | 19:55181109-55181128       |                 | 0.016679578 |
| UTR3            | 19:55181678-55181691       |                 | 0.01225395  |
| ENST00000476906 | ENSG00000261210 (CLEC19A)  | hsa-miR-146a-5p | 0.753014    |
| UTR3            | 16:19310099-19310121       |                 | 0.028925222 |
| ENST00000295087 | ENSG00000162980 (ARL5A)    | hsa-miR-146a-5p | 0.75291     |
| UTR3            | 2:152659605-152659625      |                 | 0.005994233 |
| UTR3            | 2:152659555-152659578      |                 | 0.004655337 |
| UTR3            | 2:152659177-152659204      |                 | 0.005748492 |
| UTR3            | 2:152658020-152658033      |                 | 0.001619297 |
| UTR3            | 2:152658010-152658033      |                 | 0.000665343 |
| UTR3            | 2:152657163-152657185      |                 | 0.008088019 |
| UTR3            | 2:152656276-152656292      |                 | 0.002145347 |
| ENST00000329122 | ENSG00000184724 (KRTAP6-1) | hsa-miR-146a-5p | 0.752671    |
| UTR3            | 21:31985802-31985820       |                 | 0.028895136 |
| ENST00000565367 | ENSG00000069943 (PIGB)     | hsa-miR-146a-5p | 0.752641    |
| UTR3            | 15:55632855-55632880       |                 | 0.026474523 |
| UTR3            | 15:55621979-55622000       |                 | 0.012034782 |
| ENST00000266673 | ENSG00000139291 (TMEM19)   | hsa-miR-146a-5p | 0.75211     |
| UTR3            | 12:72095134-72095160       |                 | 0.024177891 |
| UTR3            | 12:72096185-72096206       |                 | 0.001079554 |
| UTR3            | 12:72091254-72091278       |                 | 0.017298997 |

|                 |                           |                 |          |
|-----------------|---------------------------|-----------------|----------|
| ENST00000280098 | ENSG00000144228 (SPOPL)   | hsa-miR-146a-5p | 0.75186  |
| UTR3            | 2:139327055-139327079     | 0.013899793     |          |
| UTR3            | 2:139327685-139327710     | 0.002606678     |          |
| UTR3            | 2:139330213-139330235     | 0.012317472     |          |
| ENST00000381118 | ENSG00000049167 (ERCC8)   | hsa-miR-146a-5p | 0.751708 |
| UTR3            | 5:60220199-60220221       | 0.017478999     |          |
| UTR3            | 5:60199486-60199511       | 0.011331708     |          |
| ENST00000539981 | ENSG00000163539 (CLASP2)  | hsa-miR-146a-5p | 0.751648 |
| UTR3            | 3:33540045-33540071       | 0.018968249     |          |
| UTR3            | 3:33538832-33538855       | 0.003264926     |          |
| UTR3            | 3:33538256-33538266       | 0.003902216     |          |
| UTR3            | 3:33614743-33614755       | 0.013170542     |          |
| ENST00000273221 | ENSG00000144711 (IQSEC1)  | hsa-miR-146a-5p | 0.750946 |
| UTR3            | 3:12940191-12940217       | 0.004006398     |          |
| UTR3            | 3:12939592-12939619       | 0.001567302     |          |
| UTR3            | 3:12939561-12939581       | 0.001128368     |          |
| UTR3            | 3:12939182-12939202       | 0.019361265     |          |
| UTR3            | 3:12978019-12978041       | 0.013197979     |          |
| ENST00000242848 | ENSG00000123200 (ZC3H13)  | hsa-miR-146a-5p | 0.750857 |
| UTR3            | 13:46529739-46529756      | 0.00234056      |          |
| UTR3            | 13:46529692-46529720      | 0.008479488     |          |
| UTR3            | 13:46529356-46529371      | 0.003392516     |          |
| UTR3            | 13:46559533-46559558      | 0.0108338       |          |
| UTR3            | 13:46554115-46554138      | 0.010199069     |          |
| UTR3            | 13:46542122-46542147      | 0.011913528     |          |
| UTR3            | 13:46541812-46541829      | 0.021522614     |          |
| ENST00000481579 | ENSG00000077254 (USP33)   | hsa-miR-146a-5p | 0.750818 |
| UTR3            | 1:78162315-78162331       | 0.02873281      |          |
| ENST00000397412 | ENSG00000007545 (CRAMP1L) | hsa-miR-146a-5p | 0.750812 |
| UTR3            | 16:1724929-1724944        | 0.023778891     |          |
| UTR3            | 16:1725250-1725267        | 0.002015429     |          |
| UTR3            | 16:1726012-1726038        | 0.001665467     |          |
| UTR3            | 16:1726213-1726230        | 0.001272542     |          |
| ENST00000337743 | ENSG00000089123 (TASP1)   | hsa-miR-146a-5p | 0.750551 |
| UTR3            | 20:13370455-13370482      | 0.023028811     |          |
| UTR3            | 20:13370068-13370086      | 0.005680683     |          |
| ENST00000377122 | ENSG00000078114 (NEBL)    | hsa-miR-146a-5p | 0.749784 |
| UTR3            | 10:21074068-21074094      | 0.005675404     |          |
| UTR3            | 10:21073345-21073363      | 0.001292988     |          |
| UTR3            | 10:21071921-21071947      | 0.005169158     |          |
| UTR3            | 10:21071758-21071776      | 0.002637018     |          |
| UTR3            | 10:21070567-21070594      | 0.001441142     |          |
| UTR3            | 10:21069690-21069712      | 0.00986586      |          |
| UTR3            | 10:21069136-21069157      | 0.002561081     |          |
| ENST00000530758 | ENSG00000254999 (BRK1)    | hsa-miR-146a-5p | 0.749575 |
| UTR3            | 3:10168317-10168340       | 0.028624427     |          |

|                 |                           |                 |          |
|-----------------|---------------------------|-----------------|----------|
| ENST00000389063 | ENSG00000172795 (DCP2)    | hsa-miR-146a-5p | 0.749272 |
| UTR3            | 5:112349249-112349264     | 0.012024438     |          |
| UTR3            | 5:112352416-112352430     | 0.001247987     |          |
| UTR3            | 5:112353185-112353200     | 0.001393052     |          |
| UTR3            | 5:112353620-112353648     | 0.002378867     |          |
| UTR3            | 5:112354933-112354956     | 0.005470883     |          |
| UTR3            | 5:112355582-112355593     | 0.006082857     |          |
| ENST00000407627 | ENSG00000066044 (ELAVL1)  | hsa-miR-146a-5p | 0.749232 |
| UTR3            | 19:8027933-8027959        | 0.003996286     |          |
| UTR3            | 19:8027280-8027295        | 0.012477886     |          |
| UTR3            | 19:8024425-8024444        | 0.00239629      |          |
| UTR3            | 19:8023784-8023798        | 0.009724089     |          |
| ENST00000274140 | ENSG00000145495 (MARCH6)  | hsa-miR-146a-5p | 0.749214 |
| UTR3            | 5:10433902-10433924       | 0.009336636     |          |
| UTR3            | 5:10433938-10433962       | 0.003289346     |          |
| UTR3            | 5:10435168-10435187       | 0.015966982     |          |
| ENST00000308448 | ENSG00000138138 (ATAD1)   | hsa-miR-146a-5p | 0.749206 |
| UTR3            | 10:89512862-89512882      | 0.00202542      |          |
| UTR3            | 10:89511957-89511980      | 0.001796814     |          |
| UTR3            | 10:89511399-89511415      | 0.012310153     |          |
| UTR3            | 10:89511371-89511397      | 0.012459923     |          |
| ENST00000435504 | ENSG00000143970 (ASXL2)   | hsa-miR-146a-5p | 0.749064 |
| UTR3            | 2:25962355-25962380       | 0.003208564     |          |
| UTR3            | 2:25961005-25961030       | 0.002373536     |          |
| UTR3            | 2:25960072-25960088       | 0.003438629     |          |
| UTR3            | 2:25957508-25957520       | 0.00276348      |          |
| UTR3            | 2:25957054-25957076       | 0.01679573      |          |
| ENST00000503400 | ENSG00000005700 (IBTK)    | hsa-miR-146a-5p | 0.748956 |
| UTR3            | 6:82927824-82927845       | 0.014759492     |          |
| UTR3            | 6:82924148-82924168       | 0.001875469     |          |
| UTR3            | 6:82914619-82914643       | 0.002567036     |          |
| UTR3            | 6:82900901-82900922       | 0.003366874     |          |
| UTR3            | 6:82891614-82891630       | 0.00251115      |          |
| UTR3            | 6:82880965-82880987       | 0.003490522     |          |
| ENST00000359286 | ENSG00000196946 (ZNF705A) | hsa-miR-146a-5p | 0.748747 |
| UTR3            | 12:8331099-8331125        | 0.002519264     |          |
| UTR3            | 12:8331583-8331605        | 0.002088762     |          |
| UTR3            | 12:8331977-8332000        | 0.022196226     |          |
| UTR3            | 12:8329890-8329917        | 0.008778421     |          |
| ENST00000261491 | ENSG00000102780 (DGKH)    | hsa-miR-146a-5p | 0.748719 |
| UTR3            | 13:42806651-42806671      | 0.001361377     |          |
| UTR3            | 13:42807511-42807535      | 0.002120909     |          |
| UTR3            | 13:42807695-42807717      | 0.001773981     |          |
| UTR3            | 13:42811880-42811905      | 0.001995711     |          |
| UTR3            | 13:42812755-42812781      | 0.001104906     |          |

|                 |                          |                 |             |
|-----------------|--------------------------|-----------------|-------------|
| UTR3            | 13:42813647-42813667     |                 | 0.001625703 |
| UTR3            | 13:42814236-42814252     |                 | 0.001154295 |
| UTR3            | 13:42816157-42816174     |                 | 0.005022002 |
| UTR3            | 13:42816987-42817007     |                 | 0.010221331 |
| UTR3            | 13:42784783-42784803     |                 | 0.010772268 |
| ENST00000332624 | ENSG00000115993 (TRAK2)  | hsa-miR-146a-5p | 0.748679    |
| UTR3            | 2:202244213-202244236    |                 | 0.006015762 |
| UTR3            | 2:202243925-202243953    |                 | 0.002129718 |
| UTR3            | 2:202243898-202243919    |                 | 0.000793046 |
| UTR3            | 2:202242503-202242523    |                 | 0.019608011 |
| ENST00000561965 | ENSG00000167264 (DUS2)   | hsa-miR-146a-5p | 0.747854    |
| UTR3            | 16:68112355-68112376     |                 | 0.00305053  |
| UTR3            | 16:68113091-68113105     |                 | 0.025424401 |
|                 | ENSG00000148468          |                 |             |
| ENST00000378116 | (FAM171A1)               | hsa-miR-146a-5p | 0.747709    |
| UTR3            | 10:15254859-15254875     |                 | 0.004907986 |
| UTR3            | 10:15254584-15254607     |                 | 0.019008404 |
| UTR3            | 10:15254459-15254476     |                 | 0.002728254 |
| UTR3            | 10:15254302-15254321     |                 | 0.0018177   |
| ENST00000370695 | ENSG00000198689 (SLC9A6) | hsa-miR-146a-5p | 0.74765     |
| UTR3            | X:135127209-135127228    |                 | 0.014531219 |
| UTR3            | X:135128097-135128124    |                 | 0.012809048 |
| UTR3            | X:135128121-135128149    |                 | 0.001116979 |
| ENST00000355100 | ENSG00000140526 (ABHD2)  | hsa-miR-146a-5p | 0.747572    |
| UTR3            | 15:89739363-89739377     |                 | 0.003136079 |
| UTR3            | 15:89740034-89740052     |                 | 0.002945874 |
| UTR3            | 15:89745443-89745465     |                 | 0.022368537 |
| ENST00000388712 | ENSG00000135052 (GOLM1)  | hsa-miR-146a-5p | 0.747551    |
| UTR3            | 9:88642455-88642480      |                 | 0.013701812 |
| UTR3            | 9:88642281-88642304      |                 | 0.005617207 |
| UTR3            | 9:88641136-88641157      |                 | 0.007153807 |
| UTR3            | 9:88661394-88661417      |                 | 0.009833873 |
| ENST00000397512 | ENSG00000177042 (TMEM80) | hsa-miR-146a-5p | 0.747365    |
| UTR3            | 11:703960-703981         |                 | 0.028432536 |
|                 | ENSG00000173124          |                 |             |
| ENST00000327739 | (C10orf129)              | hsa-miR-146a-5p | 0.747338    |
| UTR3            | 10:96985507-96985532     |                 | 0.005640607 |
| UTR3            | 10:96985583-96985607     |                 | 0.01875445  |
| UTR3            | 10:96985743-96985766     |                 | 0.004035129 |
| ENST00000372037 | ENSG00000107779 (BMPR1A) | hsa-miR-146a-5p | 0.747063    |
| UTR3            | 10:88683548-88683576     |                 | 0.018189198 |
| UTR3            | 10:88684413-88684437     |                 | 0.002973934 |
| UTR3            | 10:88691662-88691686     |                 | 0.003047516 |
| UTR3            | 10:88692299-88692323     |                 | 0.004195765 |

|                 |                                        |                 |          |
|-----------------|----------------------------------------|-----------------|----------|
| ENST00000264711 | ENSG00000115137 (DNAJC27)              | hsa-miR-146a-5p | 0.746784 |
| UTR3            | 2:25170228-25170247                    | 0.005536992     |          |
| UTR3            | 2:25167399-25167427                    | 0.015557146     |          |
| UTR3            | 2:25167384-25167402                    | 0.001691858     |          |
| UTR3            | 2:25166927-25166941                    | 0.005596267     |          |
| ENST00000360135 | ENSG00000168781 (PIIP5K1)              | hsa-miR-146a-5p | 0.746763 |
| UTR3            | 15:43826717-43826743                   | 0.008184816     |          |
| UTR3            | 15:43826616-43826636                   | 0.01521916      |          |
| UTR3            | 15:43826338-43826363                   | 0.003611942     |          |
| UTR3            | 15:43827014-43827025                   | 0.006891396     |          |
| ENST00000394961 | ENSG00000163104 (SMARCA1)              | hsa-miR-146a-5p | 0.746744 |
| UTR3            | 4:95174076-95174103                    | 0.010604346     |          |
| UTR3            | 4:95195935;95196041-95195948;95196047  | 0.009659875     |          |
| UTR3            | 4:95199636-95199651                    | 0.003520548     |          |
| UTR3            | 4:95199648;95199767-95199668;95199773  | 0.004594094     |          |
| ENST00000528609 | ENSG00000165923 (AGBL2)                | hsa-miR-146a-5p | 0.746403 |
| UTR3            | 11:47690437-47690458                   | 0.008104619     |          |
| UTR3            | 11:47681462-47681484                   | 0.009236071     |          |
| UTR3            | 11:47703643;47711628-47703647;47711649 | 0.044057271     |          |
| ENST00000223073 | ENSG00000106344 (RBM28)                | hsa-miR-146a-5p | 0.745937 |
| UTR3            | 7:127950554-127950578                  | 0.006947414     |          |
| UTR3            | 7:127948550-127948572                  | 0.001073343     |          |
| UTR3            | 7:127947447-127947465                  | 0.001864247     |          |
| UTR3            | 7:127947337-127947356                  | 0.001746621     |          |
| UTR3            | 7:127945486-127945505                  | 0.001941085     |          |
| UTR3            | 7:127938730-127938743                  | 0.002991324     |          |
| UTR3            | 7:127937990-127938003                  | 0.009737153     |          |
| UTR3            | 7:127957767-127957785                  | 0.009948234     |          |
| ENST00000265071 | ENSG00000113361 (CDH6)                 | hsa-miR-146a-5p | 0.745872 |
| UTR3            | 5:31323667-31323694                    | 0.007687153     |          |
| UTR3            | 5:31323979-31323999                    | 0.003759869     |          |
| UTR3            | 5:31325743-31325755                    | 0.003549541     |          |
| UTR3            | 5:31328951-31328970                    | 0.00355894      |          |
| UTR3            | 5:31329145-31329169                    | 0.009748056     |          |
| ENST00000558158 | ENSG00000166069 (TMCO5A)               | hsa-miR-146a-5p | 0.745255 |
| UTR3            | 15:38234505-38234531                   | 0.024609799     |          |
| UTR3            | 15:38235767-38235795                   | 0.003640621     |          |
| ENST00000380672 | ENSG00000173068 (BNC2)                 | hsa-miR-146a-5p | 0.745249 |
| UTR3            | 9:16416380-16416405                    | 0.001568865     |          |
| UTR3            | 9:16415378-16415396                    | 0.001671604     |          |

|                 |                          |                 |             |
|-----------------|--------------------------|-----------------|-------------|
| UTR3            | 9:16410755-16410770      |                 | 0.002098057 |
| UTR3            | 9:16410172-16410192      |                 | 0.0046937   |
| UTR3            | 9:16410165-16410190      |                 | 0.001242199 |
| UTR3            | 9:16409908-16409934      |                 | 0.015513601 |
| UTR3            | 9:16435730-16435746      |                 | 0.007337621 |
| ENST00000323571 | ENSG00000171475 (WIPF2)  | hsa-miR-146a-5p | 0.745192    |
| UTR3            | 17:38434510-38434530     |                 | 0.008767148 |
| UTR3            | 17:38435027-38435051     |                 | 0.007787225 |
| UTR3            | 17:38435162-38435185     |                 | 0.008310998 |
| UTR3            | 17:38438616-38438642     |                 | 0.001169269 |
| UTR3            | 17:38420761-38420784     |                 | 0.010874106 |
| ENST00000313806 | ENSG00000159200 (RCAN1)  | hsa-miR-146a-5p | 0.74517     |
| UTR3            | 21:35889881-35889894     |                 | 0.008684016 |
| UTR3            | 21:35888949-35888967     |                 | 0.01955906  |
| ENST00000563428 | ENSG00000103168 (TAF1C)  | hsa-miR-146a-5p | 0.745046    |
|                 | 16:84213946;84214649-    |                 |             |
| UTR3            | 84213950;84214663        |                 | 0.028232455 |
| ENST00000278379 | ENSG00000110436 (SLC1A2) | hsa-miR-146a-5p | 0.744918    |
| UTR3            | 11:35282223-35282238     |                 | 0.005383055 |
| UTR3            | 11:35282024-35282047     |                 | 0.003581501 |
| UTR3            | 11:35281260-35281287     |                 | 0.001228736 |
| UTR3            | 11:35279972-35279999     |                 | 0.001067206 |
| UTR3            | 11:35279260-35279282     |                 | 0.001818337 |
| UTR3            | 11:35278349-35278373     |                 | 0.000914673 |
| UTR3            | 11:35278013-35278035     |                 | 0.002164756 |
| UTR3            | 11:35277468-35277486     |                 | 0.002099429 |
| UTR3            | 11:35276120-35276145     |                 | 0.001534929 |
| UTR3            | 11:35274191-35274218     |                 | 0.001268406 |
| UTR3            | 11:35273673-35273700     |                 | 0.005217766 |
| UTR3            | 11:35273558-35273573     |                 | 0.001942589 |
| ENST00000503129 | ENSG00000152670 (DDX4)   | hsa-miR-146a-5p | 0.744186    |
| UTR3            | 5:55094324-55094344      |                 | 0.004741104 |
| UTR3            | 5:55094343-55094362      |                 | 0.023417438 |
| ENST00000318522 | ENSG00000143924 (EML4)   | hsa-miR-146a-5p | 0.744139    |
| UTR3            | 2:42558814-42558832      |                 | 0.006506355 |
| UTR3            | 2:42559080-42559097      |                 | 0.016272795 |
| UTR3            | 2:42559310-42559330      |                 | 0.002220503 |
| UTR3            | 2:42557145-42557159      |                 | 0.015108047 |
| ENST00000383815 | ENSG00000163701 (IL17RE) | hsa-miR-146a-5p | 0.743442    |
|                 | 3:9952842;9952939-       |                 |             |
| UTR3            | 9952858;9952943          |                 | 0.025513479 |
|                 | 3:9948543;9948645-       |                 |             |
| UTR3            | 9948549;9948657          |                 | 0.012526569 |
| ENST00000375859 | ENSG00000106723 (SPIN1)  | hsa-miR-146a-5p | 0.743223    |
| UTR3            | 9:91092699-91092727      |                 | 0.00366862  |
| UTR3            | 9:91093239-91093256      |                 | 0.016771442 |
| UTR3            | 9:91093470-91093496      |                 | 0.007635913 |



|                 |                           |                 |          |
|-----------------|---------------------------|-----------------|----------|
| ENST00000425217 | ENSG00000171435 (KSR2)    | hsa-miR-146a-5p | 0.742747 |
| UTR3            | 12:117904253-117904280    | 0.001872919     |          |
| UTR3            | 12:117902773-117902796    | 0.001100254     |          |
| UTR3            | 12:117901663-117901686    | 0.001210662     |          |
| UTR3            | 12:117900606-117900621    | 0.00505229      |          |
| UTR3            | 12:117898334-117898359    | 0.006616551     |          |
| UTR3            | 12:117896986-117897007    | 0.001553948     |          |
| UTR3            | 12:117895323-117895346    | 0.000923132     |          |
| UTR3            | 12:117893705-117893728    | 0.001038116     |          |
| UTR3            | 12:117893278-117893299    | 0.001181664     |          |
| UTR3            | 12:117892109-117892137    | 0.001694999     |          |
| UTR3            | 12:117891929-117891950    | 0.002241032     |          |
| UTR3            | 12:117891131-117891155    | 0.003549633     |          |
| ENST00000281405 | ENSG00000118965 (WDR35)   | hsa-miR-146a-5p | 0.74245  |
| UTR3            | 2:20113010-20113030       | 0.00467745      |          |
| UTR3            | 2:20112431-20112446       | 0.004085916     |          |
| UTR3            | 2:20112418-20112446       | 0.001609817     |          |
| UTR3            | 2:20112278-20112298       | 0.002028621     |          |
| UTR3            | 2:20111991-20112009       | 0.002281082     |          |
| UTR3            | 2:20111572-20111599       | 0.001277346     |          |
| UTR3            | 2:20111351-20111375       | 0.001494322     |          |
| UTR3            | 2:20110904-20110926       | 0.00274985      |          |
| UTR3            | 2:20110784-20110802       | 0.002809308     |          |
| UTR3            | 2:20110357-20110374       | 0.00499608      |          |
| ENST00000499810 | ENSG00000120705 (ETF1)    | hsa-miR-146a-5p | 0.742291 |
| UTR3            | 5:137842384-137842410     | 0.014819097     |          |
| UTR3            | 5:137841992-137842006     | 0.013177077     |          |
| ENST00000395254 | ENSG00000138311 (ZNF365)  | hsa-miR-146a-5p | 0.742203 |
| UTR3            | 10:64160112-64160139      | 0.027988653     |          |
| ENST00000338316 | ENSG00000078295 (ADCY2)   | hsa-miR-146a-5p | 0.742039 |
| UTR3            | 5:7827088-7827116         | 0.003190431     |          |
| UTR3            | 5:7829004-7829031         | 0.020933708     |          |
| UTR3            | 5:7829258-7829282         | 0.001786855     |          |
| UTR3            | 5:7829340-7829365         | 0.00206366      |          |
| ENST00000334884 | ENSG00000005483 (KMT2E)   | hsa-miR-146a-5p | 0.741986 |
| UTR3            | 7:104748114-104748141     | 0.00876632      |          |
| UTR3            | 7:104750762-104750788     | 0.002840895     |          |
| UTR3            | 7:104751261-104751281     | 0.003113296     |          |
| UTR3            | 7:104752915-104752936     | 0.001794039     |          |
| UTR3            | 7:104753892-104753920     | 0.003339906     |          |
| UTR3            | 7:104754332-104754359     | 0.004125799     |          |
| UTR3            | 7:104747624-104747637     | 0.018619957     |          |
| ENST00000443676 | ENSG00000215356 (ZNF705B) | hsa-miR-146a-5p | 0.741201 |
| UTR3            | 8:7810832-7810858         | 0.002197483     |          |
| UTR3            | 8:7811316-7811338         | 0.002155832     |          |
| UTR3            | 8:7811710-7811733         | 0.021605778     |          |

|                 |                           |                 |             |
|-----------------|---------------------------|-----------------|-------------|
| UTR3            | 8:7809624-7809651         |                 | 0.009545215 |
| ENST00000525557 | ENSG00000140090 (SLC24A4) | hsa-miR-146a-5p | 0.741017    |
| UTR3            | 14:92959860-92959885      |                 | 0.005757555 |
| UTR3            | 14:92960007-92960028      |                 | 0.002090549 |
| UTR3            | 14:92960371-92960395      |                 | 0.010720382 |
| UTR3            | 14:92960596-92960616      |                 | 0.002742919 |
| UTR3            | 14:92961887-92961906      |                 | 0.006576137 |
| ENST00000361085 | ENSG00000075407 (ZNF37A)  | hsa-miR-146a-5p | 0.740919    |
| UTR3            | 10:38407841-38407859      |                 | 0.026008923 |
| UTR3            | 10:38409704-38409730      |                 | 0.001870289 |
| ENST00000265843 | ENSG00000110723 (EXPH5)   | hsa-miR-146a-5p | 0.740735    |
| UTR3            | 11:108379335-108379352    |                 | 0.003618741 |
| UTR3            | 11:108376247-108376270    |                 | 0.014543727 |
| UTR3            | 11:108376236-108376250    |                 | 0.003897475 |
| UTR3            | 11:108409804-108409824    |                 | 0.00844923  |
| UTR3            | 11:108384421-108384440    |                 | 0.009135927 |
| UTR3            | 11:108383011-108383032    |                 | 0.008257432 |
| ENST00000524135 | ENSG00000185728 (YTHDF3)  | hsa-miR-146a-5p | 0.740544    |
| UTR3            | 8:64099029-64099053       |                 | 0.022180219 |
| UTR3            | 8:64124147-64124160       |                 | 0.002418696 |
| UTR3            | 8:64124438-64124463       |                 | 0.003248372 |
| ENST00000425534 | ENSG00000163412 (EIF4E3)  | hsa-miR-146a-5p | 0.740531    |
| UTR3            | 3:71730992-71731005       |                 | 0.00146791  |
| UTR3            | 3:71729548-71729567       |                 | 0.001305347 |
| UTR3            | 3:71728199-71728211       |                 | 0.008205902 |
| UTR3            | 3:71728088-71728110       |                 | 0.001047364 |
| UTR3            | 3:71727420-71727441       |                 | 0.001795691 |
| UTR3            | 3:71726641-71726665       |                 | 0.001020106 |
| UTR3            | 3:71725157-71725173       |                 | 0.005428295 |
| UTR3            | 3:71724601-71724626       |                 | 0.007575527 |
| ENST00000534127 | ENSG00000166444 (ST5)     | hsa-miR-146a-5p | 0.740509    |
| UTR3            | 11:8714929-8714948        |                 | 0.026295775 |
| UTR3            | 11:8752726-8752741        |                 | 0.007670813 |
| ENST00000367290 | ENSG00000120262 (CCDC170) | hsa-miR-146a-5p | 0.739936    |
| UTR3            | 6:151939597-151939613     |                 | 0.027795574 |
| ENST00000377627 | ENSG00000041988 (THAP3)   | hsa-miR-146a-5p | 0.739822    |
| UTR3            | 1:6695167-6695182         |                 | 0.027785908 |
| ENST00000231461 | ENSG00000113532 (ST8SIA4) | hsa-miR-146a-5p | 0.739547    |
| UTR3            | 5:100145625-100145646     |                 | 0.025588906 |
| UTR3            | 5:100144706-100144724     |                 | 0.002173705 |
| ENST00000581161 | ENSG00000176225 (RTTN)    | hsa-miR-146a-5p | 0.739282    |
| UTR3            | 18:67812926-67812940      |                 | 0.004070491 |
| UTR3            | 18:67741162-67741187      |                 | 0.0061682   |

|                 |                                        |                 |             |
|-----------------|----------------------------------------|-----------------|-------------|
| UTR3            | 18:67721391-67721412                   |                 | 0.002225383 |
| UTR3            | 18:67715345-67715371                   |                 | 0.001703317 |
|                 | 18:67688042;67691958-67688053;67691965 |                 | 0.013572697 |
| ENST00000358154 | ENSG00000197006 (METTL9)               | hsa-miR-146a-5p | 0.73916     |
| UTR3            | 16:21667597-21667619                   |                 | 0.009778258 |
| UTR3            | 16:21668000-21668026                   |                 | 0.004550026 |
| UTR3            | 16:21668562-21668583                   |                 | 0.008736581 |
| UTR3            | 16:21666716-21666742                   |                 | 0.021282407 |
| ENST00000559724 | ENSG00000197299 (BLM)                  | hsa-miR-146a-5p | 0.739077    |
| UTR3            | 15:91304163-91304179                   |                 | 0.017428668 |
| UTR3            | 15:91304443-91304463                   |                 | 0.003744245 |
| UTR3            | 15:91358388-91358415                   |                 | 0.006549794 |
| ENST00000264914 | ENSG00000113273 (ARSB)                 | hsa-miR-146a-5p | 0.738514    |
| UTR3            | 5:78076162-78076182                    |                 | 0.002869956 |
| UTR3            | 5:78075930-78075951                    |                 | 0.01755465  |
| UTR3            | 5:78075030-78075050                    |                 | 0.002159202 |
| UTR3            | 5:78074431-78074452                    |                 | 0.005091263 |
| ENST00000340057 | ENSG00000112115 (IL17A)                | hsa-miR-146a-5p | 0.7385      |
| UTR3            | 6:52054827-52054843                    |                 | 0.01732916  |
| UTR3            | 6:52054949-52054969                    |                 | 0.010344696 |
| ENST00000295092 | ENSG00000162981 (FAM84A)               | hsa-miR-146a-5p | 0.73808     |
| UTR3            | 2:14775043-14775070                    |                 | 0.006701904 |
| UTR3            | 2:14775343-14775370                    |                 | 0.002947344 |
| UTR3            | 2:14776247-14776261                    |                 | 0.003487858 |
| UTR3            | 2:14778135-14778156                    |                 | 0.001793373 |
| UTR3            | 2:14778303-14778326                    |                 | 0.001566353 |
| UTR3            | 2:14779381-14779407                    |                 | 0.00434844  |
| UTR3            | 2:14779554-14779573                    |                 | 0.00269352  |
| UTR3            | 2:14779924-14779943                    |                 | 0.00409955  |
| ENST00000585477 | ENSG00000228075 (BOD1L2)               | hsa-miR-146a-5p | 0.738066    |
| UTR3            | 18:54816605-54816623                   |                 | 0.003136516 |
| UTR3            | 18:54817114-54817127                   |                 | 0.004386204 |
| UTR3            | 18:54817186-54817201                   |                 | 0.016575048 |
| UTR3            | 18:54814882-54814908                   |                 | 0.016566024 |
| ENST00000328439 | ENSG00000196132 (MYT1)                 | hsa-miR-146a-5p | 0.737797    |
| UTR3            | 20:62872092-62872112                   |                 | 0.026420864 |
| UTR3            | 20:62848507-62848530                   |                 | 0.005931999 |
| ENST00000529122 | ENSG00000254535 (PABPC4L)              | hsa-miR-146a-5p | 0.73778     |
| UTR3            | 4:135119689-135119709                  |                 | 0.001685147 |
| UTR3            | 4:135118503-135118531                  |                 | 0.003278821 |
| UTR3            | 4:135117547-135117563                  |                 | 0.022648966 |
| ENST00000314011 | ENSG00000125945 (ZNF436)               | hsa-miR-146a-5p | 0.737775    |
| UTR3            | 1:23687881-23687897                    |                 | 0.002920859 |

|                 |                                 |                 |             |
|-----------------|---------------------------------|-----------------|-------------|
| UTR3            | 1:23687169-23687196             |                 | 0.002517414 |
| UTR3            | 1:23686512-23686533             |                 | 0.00254246  |
| UTR3            | 1:23686473-23686499             |                 | 0.009275488 |
| UTR3            | 1:23689450-23689472             |                 | 0.027024564 |
| UTR3            | 1:23689252-23689272             |                 | 0.014346948 |
| ENST00000373036 | ENSG00000188786 (MTF1)          | hsa-miR-146a-5p | 0.737763    |
| UTR3            | 1:38279179-38279205             |                 | 0.001320727 |
| UTR3            | 1:38278992-38279019             |                 | 0.002030099 |
| UTR3            | 1:38277993-38278011             |                 | 0.005188797 |
| UTR3            | 1:38276658-38276685             |                 | 0.001850365 |
| UTR3            | 1:38276127-38276145             |                 | 0.003769872 |
| UTR3            | 1:38275969-38275996             |                 | 0.005237584 |
| UTR3            | 1:38275818-38275840             |                 | 0.005573125 |
| UTR3            | 1:38287813-38287827             |                 | 0.012637803 |
| ENST00000357250 | ENSG00000112280 (COL9A1)        | hsa-miR-146a-5p | 0.737745    |
| UTR3            | 6:70926411-70926430             |                 | 0.01221746  |
| UTR3            | 6:70926190-70926210             |                 | 0.015392523 |
| ENST00000537676 | ENSG00000165192 (ASB11)         | hsa-miR-146a-5p | 0.737737    |
| UTR3            | X:15301443-15301468             |                 | 0.023827996 |
| UTR3            | X:15300503-15300528             |                 | 0.003781377 |
| ENST00000203001 | ENSG00000089195 (TRMT6)         | hsa-miR-146a-5p | 0.737626    |
| UTR3            | 20:5919148-5919166              |                 | 0.023041822 |
| UTR3            | 20:5918769-5918788              |                 | 0.004558149 |
| ENST00000296812 | ENSG00000151876 (FBXO4)         | hsa-miR-146a-5p | 0.737235    |
| UTR3            | 5:41934534-41934561             |                 | 0.008842127 |
| UTR3            | 5:41935058-41935065             |                 | 0.018724844 |
| ENST00000325455 | ENSG00000082175 (PGR)           | hsa-miR-146a-5p | 0.737075    |
| UTR3            | 11:100909018-100909034          |                 | 0.002898197 |
| UTR3            | 11:100905128-100905148          |                 | 0.001148552 |
| UTR3            | 11:100904014-100904040          |                 | 0.001993331 |
| UTR3            | 11:100902310-100902315          |                 | 0.001507442 |
| UTR3            | 11:100901858-100901875          |                 | 0.001077059 |
| UTR3            | 11:100901540-100901562          |                 | 0.010947185 |
| UTR3            | 11:100901169-100901192          |                 | 0.005306827 |
| UTR3            | 11:100900920-100900938          |                 | 0.002674858 |
| ENST00000564533 | ENSG00000260240 (RP11-105C20.2) | hsa-miR-146a-5p | 0.736848    |
| UTR3            | 16:59771866-59771886            |                 | 0.027534364 |
| ENST00000463144 | ENSG00000204410 (MSH5)          | hsa-miR-146a-5p | 0.736639    |
| UTR3            | 6:31721103-31721125             |                 | 0.008810273 |
| UTR3            | 6:31721378-31721400             |                 | 0.004935601 |
| UTR3            | 6:31726017-31726030             |                 | 0.013770835 |
| ENST00000338056 | ENSG00000105784 (RUNDC3B)       | hsa-miR-146a-5p | 0.736632    |
| UTR3            | 7:87459838-87459853             |                 | 0.012158351 |
| UTR3            | 7:87460908-87460928             |                 | 0.012600136 |

|                 |                           |                 |             |
|-----------------|---------------------------|-----------------|-------------|
| UTR3            | 7:87460914-87460936       |                 | 0.00275762  |
| ENST00000356205 | ENSG00000143570 (SLC39A1) | hsa-miR-146a-5p | 0.736169    |
| UTR3            | 1:153932522-153932539     |                 | 0.002772303 |
| UTR3            | 1:153932452-153932472     |                 | 0.017727469 |
| UTR3            | 1:153931970-153931989     |                 | 0.006977401 |
| ENST00000452027 | ENSG00000154548 (SRSF12)  | hsa-miR-146a-5p | 0.735976    |
| UTR3            | 6:89806949-89806971       |                 | 0.027460915 |
| ENST00000287957 | ENSG00000157259 (GATAD1)  | hsa-miR-146a-5p | 0.735863    |
| UTR3            | 7:92085994-92086021       |                 | 0.021277475 |
| UTR3            | 7:92087047-92087070       |                 | 0.006173935 |
| ENST00000554081 | ENSG00000185246 (PRPF39)  | hsa-miR-146a-5p | 0.735199    |
| UTR3            | 14:45578908-45578932      |                 | 0.00557445  |
| UTR3            | 14:45581641-45581660      |                 | 0.002759825 |
| UTR3            | 14:45584961-45584983      |                 | 0.004866203 |
| UTR3            | 14:45585161-45585173      |                 | 0.01419511  |
| ENST00000438447 | ENSG00000133401 (PDZD2)   | hsa-miR-146a-5p | 0.735049    |
| UTR3            | 5:32108255-32108271       |                 | 0.024524222 |
| UTR3            | 5:32109990-32110014       |                 | 0.001723403 |
| UTR3            | 5:32090222-32090244       |                 | 0.005617387 |
| ENST00000593946 | ENSG00000039650 (PNKP)    | hsa-miR-146a-5p | 0.734939    |
| UTR3            | 19:50365669-50365688      |                 | 0.003132535 |
| UTR3            | 19:50365342;50365442-     |                 |             |
| UTR3            | 50365362;50365449         |                 | 0.00304718  |
| UTR3            | 19:50364515-50364539      |                 | 0.021194076 |
| ENST00000313070 | ENSG00000081803 (CADPS2)  | hsa-miR-146a-5p | 0.734715    |
| UTR3            | 7:121959842-121959850     |                 | 0.00478924  |
| UTR3            | 7:121959106-121959128     |                 | 0.003667822 |
| UTR3            | 7:121959048-121959066     |                 | 0.009716258 |
| UTR3            | 7:121958866-121958880     |                 | 0.004219968 |
| UTR3            | 7:121958664-121958684     |                 | 0.004961735 |
| ENST00000586178 | ENSG00000011258 (MBTD1)   | hsa-miR-146a-5p | 0.734704    |
| UTR3            | 17:49257277-49257302      |                 | 0.006482296 |
| UTR3            | 17:49257099-49257126      |                 | 0.007625253 |
| UTR3            | 17:49256140-49256157      |                 | 0.001997146 |
| UTR3            | 17:49255957-49255983      |                 | 0.002976594 |
| UTR3            | 17:49254967-49254995      |                 | 0.008272781 |
| ENST00000376701 | ENSG00000015285 (WAS)     | hsa-miR-146a-5p | 0.73465     |
| UTR3            | X:48549731-48549755       |                 | 0.006914588 |
| UTR3            | X:48549748-48549761       |                 | 0.020434987 |
| ENST00000354452 | ENSG00000196628 (TCF4)    | hsa-miR-146a-5p | 0.734453    |
| UTR3            | 18:52894372-52894391      |                 | 0.005397486 |
| UTR3            | 18:52893419-52893431      |                 | 0.003296146 |
| UTR3            | 18:52892519-52892539      |                 | 0.009591558 |
| UTR3            | 18:52891555-52891568      |                 | 0.002930244 |

|                 |                            |                 |             |          |
|-----------------|----------------------------|-----------------|-------------|----------|
| UTR3            | 18:52890168-52890190       |                 | 0.006117567 |          |
| ENST00000416691 | ENSG00000133103 (COG6)     | hsa-miR-146a-5p |             | 0.73429  |
| UTR3            | 13:40363169-40363195       |                 | 0.009979994 |          |
| UTR3            | 13:40364358-40364378       |                 | 0.002528366 |          |
| UTR3            | 13:40364999-40365015       |                 | 0.002936137 |          |
| UTR3            | 13:40365012-40365035       |                 | 0.001329693 |          |
| UTR3            | 13:40365720-40365729       |                 | 0.007244967 |          |
| UTR3            | 13:40253707-40253731       |                 | 0.015416381 |          |
| ENST00000394008 | ENSG00000198083 (KRTAP9-9) | hsa-miR-146a-5p |             | 0.733869 |
| UTR3            | 17:39412242-39412252       |                 | 0.010420289 |          |
| UTR3            | 17:39412359-39412380       |                 | 0.016863805 |          |
| ENST00000532592 | ENSG00000170743 (SYT9)     | hsa-miR-146a-5p |             | 0.733817 |
| UTR3            | 11:7489041-7489066         |                 | 0.001731113 |          |
| UTR3            | 11:7489498-7489514         |                 | 0.016514964 |          |
| UTR3            | 11:7490193-7490219         |                 | 0.009033736 |          |
| ENST00000209875 | ENSG00000094916 (CBX5)     | hsa-miR-146a-5p |             | 0.733622 |
| UTR3            | 12:54635386-54635402       |                 | 0.011437923 |          |
| UTR3            | 12:54632906-54632931       |                 | 0.002459292 |          |
| UTR3            | 12:54630985-54631006       |                 | 0.001886556 |          |
| UTR3            | 12:54629577-54629594       |                 | 0.002302396 |          |
| UTR3            | 12:54628661-54628680       |                 | 0.002529992 |          |
| UTR3            | 12:54627871-54627890       |                 | 0.002029345 |          |
| UTR3            | 12:54625272-54625296       |                 | 0.004617961 |          |
| ENST00000361377 | ENSG00000164172 (MOCS2)    | hsa-miR-146a-5p |             | 0.733536 |
| UTR3            | 5:52393851-52393867        |                 | 0.027256281 |          |
| ENST00000373218 | ENSG00000148730 (EIF4EBP2) | hsa-miR-146a-5p |             | 0.73297  |
| UTR3            | 10:72184543-72184567       |                 | 0.009499709 |          |
| UTR3            | 10:72184844-72184870       |                 | 0.003111461 |          |
| UTR3            | 10:72185256-72185273       |                 | 0.007410466 |          |
| UTR3            | 10:72188305-72188327       |                 | 0.00718737  |          |
| ENST00000551632 | ENSG00000178498 (DTX3)     | hsa-miR-146a-5p |             | 0.732615 |
| UTR3            | 12:58003156-58003172       |                 | 0.002243689 |          |
| UTR3            | 12:58003408-58003426       |                 | 0.024935642 |          |
| ENST00000354449 | ENSG00000197548 (ATG7)     | hsa-miR-146a-5p |             | 0.732446 |
| UTR3            | 3:11597745-11597765        |                 | 0.001179585 |          |
| UTR3            | 3:11598004-11598031        |                 | 0.014601651 |          |
| UTR3            | 3:11598244-11598266        |                 | 0.011384029 |          |
| ENST00000318238 | ENSG00000177409 (SAMD9L)   | hsa-miR-146a-5p |             | 0.732425 |
| UTR3            | 7:92760458-92760477        |                 | 0.004957551 |          |
| UTR3            | 7:92759734-92759759        |                 | 0.005318299 |          |
| UTR3            | 7:92759708-92759734        |                 | 0.00280099  |          |
| UTR3            | 7:92759548-92759569        |                 | 0.014086669 |          |
| ENST00000491614 | ENSG00000165609 (NUDT5)    | hsa-miR-146a-5p |             | 0.732203 |
| UTR3            | 10:12209360-12209373       |                 | 0.024624672 |          |

|                 |                         |                 |             |
|-----------------|-------------------------|-----------------|-------------|
| UTR3            | 10:12208683-12208697    |                 | 0.001705083 |
| UTR3            | 10:12208671-12208697    |                 | 0.000815194 |
| ENST00000320672 | ENSG00000145687 (SSBP2) | hsa-miR-146a-5p | 0.731934    |
| UTR3            | 5:80715650-80715675     |                 | 0.003898335 |
| UTR3            | 5:80715129-80715150     |                 | 0.004271012 |
| UTR3            | 5:80712983-80713004     |                 | 0.001502898 |
| UTR3            | 5:80712678-80712706     |                 | 0.001893006 |
| UTR3            | 5:80712240-80712265     |                 | 0.002516015 |
| UTR3            | 5:80711089-80711114     |                 | 0.003981479 |
| UTR3            | 5:80710458-80710482     |                 | 0.001349791 |
| UTR3            | 5:80709081-80709105     |                 | 0.007710063 |
| ENST00000328747 | ENSG00000146757 (ZNF92) | hsa-miR-146a-5p | 0.73189     |
|                 | 7:64853807;64863254-    |                 |             |
| UTR3            | 64853814;64863266       |                 | 0.015000645 |
| UTR3            | 7:64863903-64863921     |                 | 0.01721057  |
| UTR3            | 7:64864071-64864089     |                 | 0.016438553 |
| UTR3            | 7:64864659-64864677     |                 | 0.030454349 |
| ENST00000597774 | ENSG00000196961 (AP2A1) | hsa-miR-146a-5p | 0.73143     |
| UTR3            | 19:50302677-50302703    |                 | 0.011382961 |
|                 | 19:50304243;50304660-   |                 |             |
| UTR3            | 50304256;50304664       |                 | 0.013607156 |
| UTR3            | 19:50306572-50306599    |                 | 0.002090491 |
|                 | ENSG00000174695         |                 |             |
| ENST00000502346 | (TMEM167A)              | hsa-miR-146a-5p | 0.731404    |
| UTR3            | 5:82352768-82352783     |                 | 0.009677789 |
| UTR3            | 5:82350797-82350814     |                 | 0.001643411 |
| UTR3            | 5:82350452-82350477     |                 | 0.008203916 |
| UTR3            | 5:82349440-82349454     |                 | 0.003947701 |
| UTR3            | 5:82349092-82349118     |                 | 0.003605638 |
| ENST00000493594 | ENSG00000117226 (GBP3)  | hsa-miR-146a-5p | 0.73119     |
| UTR3            | 1:89473013-89473038     |                 | 0.027060633 |
| ENST00000285208 | ENSG00000154917 (RAB6B) | hsa-miR-146a-5p | 0.731025    |
| UTR3            | 3:133547225-133547244   |                 | 0.004460754 |
| UTR3            | 3:133546876-133546889   |                 | 0.002668254 |
| UTR3            | 3:133546036-133546063   |                 | 0.002016221 |
| UTR3            | 3:133545202-133545219   |                 | 0.001086443 |
| UTR3            | 3:133545055-133545079   |                 | 0.000919666 |
| UTR3            | 3:133544689-133544708   |                 | 0.006965892 |
| UTR3            | 3:133543086-133543097   |                 | 0.008929674 |
| ENST00000341516 | ENSG00000139990 (DCAF5) | hsa-miR-146a-5p | 0.730972    |
| UTR3            | 14:69520197-69520215    |                 | 0.012257123 |
| UTR3            | 14:69519487-69519503    |                 | 0.003348623 |
| UTR3            | 14:69518458-69518480    |                 | 0.0022644   |
| UTR3            | 14:69517697-69517714    |                 | 0.004831934 |
| UTR3            | 14:69584886-69584909    |                 | 0.013321774 |
|                 | 14:69558600;69583083-   |                 |             |
| UTR3            | 69558604;69583105       |                 | 0.006306571 |

|                 |                                        |                 |          |
|-----------------|----------------------------------------|-----------------|----------|
| ENST00000367635 | ENSG00000116191 (RALGPS2)              | hsa-miR-146a-5p | 0.73045  |
| UTR3            | 1:178885610-178885626                  | 0.016649975     |          |
| UTR3            | 1:178885988-178886011                  | 0.002462159     |          |
| UTR3            | 1:178886027-178886045                  | 0.002334513     |          |
| UTR3            | 1:178887019-178887045                  | 0.001806963     |          |
| UTR3            | 1:178863106-178863121                  | 0.017167767     |          |
| ENST00000413432 | ENSG00000006607 (FARP2)                | hsa-miR-146a-5p | 0.730415 |
| UTR3            | 2:242383392-242383408                  | 0.001536109     |          |
| UTR3            | 2:242384525-242384543                  | 0.001346798     |          |
| UTR3            | 2:242385154-242385179                  | 0.007124595     |          |
| UTR3            | 2:242386093-242386119                  | 0.006161804     |          |
| UTR3            | 2:242386151-242386163                  | 0.008902427     |          |
| UTR3            | 2:242381695-242381719                  | 0.009233577     |          |
| ENST00000273375 | ENSG00000144840 (RABL3)                | hsa-miR-146a-5p | 0.729535 |
| UTR3            | 3:120408481-120408504                  | 0.004271288     |          |
| UTR3            | 3:120407232-120407248                  | 0.001541299     |          |
| UTR3            | 3:120405695-120405719                  | 0.016837611     |          |
| UTR3            | 3:120405532-120405554                  | 0.004273095     |          |
| ENST00000326407 | ENSG00000135916 (ITM2C)                | hsa-miR-146a-5p | 0.728941 |
| UTR3            | 2:231743433-231743456                  | 0.003981531     |          |
| UTR3            | 2:231743767-231743780                  | 0.006415481     |          |
| UTR3            | 2:231743809-231743825                  | 0.006959177     |          |
| UTR3            | 2:231743890-231743909                  | 0.00951798      |          |
| ENST00000220244 | ENSG00000103888 (KIAA1199)             | hsa-miR-146a-5p | 0.728868 |
| UTR3            | 15:81243603-81243621                   | 0.024180375     |          |
| UTR3            | 15:81234367-81234390                   | 0.012606234     |          |
| ENST00000477053 | ENSG00000134490 (TMEM241)              | hsa-miR-146a-5p | 0.728842 |
| UTR3            | 18:20932231;20936558-20932253;20936561 | 0.006520917     |          |
| UTR3            | 18:20877989-20878007                   | 0.00494183      |          |
| UTR3            | 18:20877197-20877211                   | 0.001625192     |          |
| UTR3            | 18:20876007-20876020                   | 0.01377804      |          |
| ENST00000448849 | ENSG00000134897 (BIVM)                 | hsa-miR-146a-5p | 0.728793 |
| UTR3            | 13:103492339-103492353                 | 0.024493085     |          |
| UTR3            | 13:103493269-103493292                 | 0.002368777     |          |
| ENST00000480058 | ENSG00000112739 (PRPF4B)               | hsa-miR-146a-5p | 0.728702 |
| UTR3            | 6:4062076-4062100                      | 0.009701209     |          |
| UTR3            | 6:4062397-4062421                      | 0.003332188     |          |
| UTR3            | 6:4064554-4064567                      | 0.013820951     |          |
| ENST00000367588 | ENSG00000135835 (KIAA1614)             | hsa-miR-146a-5p | 0.728611 |
| UTR3            | 1:180915319-180915335                  | 0.004844488     |          |
| UTR3            | 1:180915564-180915580                  | 0.011100525     |          |
| UTR3            | 1:180915897-180915916                  | 0.010221201     |          |



|                 |                           |                 |             |
|-----------------|---------------------------|-----------------|-------------|
| UTR3            | 1:180905580-180905602     |                 | 0.003359965 |
| ENST00000559192 | ENSG00000140455 (USP3)    | hsa-miR-146a-5p | 0.728557    |
| UTR3            | 15:63883306-63883327      |                 | 0.019188363 |
| UTR3            | 15:63886075-63886099      |                 | 0.002605    |
| UTR3            | 15:63886810-63886828      |                 | 0.005049014 |
| ENST00000392438 | ENSG00000198836 (OPA1)    | hsa-miR-146a-5p | 0.728522    |
| UTR3            | 3:193412654-193412681     |                 | 0.004347384 |
| UTR3            | 3:193413050-193413078     |                 | 0.002105715 |
| UTR3            | 3:193415041-193415061     |                 | 0.014528414 |
| UTR3            | 3:193332650-193332667     |                 | 0.015852153 |
| UTR3            | 3:193360583-193360606     |                 | 0.009578091 |
| ENST00000529689 | ENSG00000137500 (CCDC90B) | hsa-miR-146a-5p | 0.72852     |
| UTR3            | 11:82970573-82970595      |                 | 0.002783952 |
| UTR3            | 11:82970498-82970515      |                 | 0.003473714 |
| UTR3            | 11:82970202-82970225      |                 | 0.020581681 |
| ENST00000261438 | ENSG00000109787 (KLF3)    | hsa-miR-146a-5p | 0.728448    |
| UTR3            | 4:38699030-38699056       |                 | 0.007705201 |
| UTR3            | 4:38699193-38699210       |                 | 0.019128144 |
| ENST00000370125 | ENSG00000079335 (CDC14A)  | hsa-miR-146a-5p | 0.728422    |
| UTR3            | 1:100964495-100964516     |                 | 0.020949811 |
| UTR3            | 1:100984811-100984829     |                 | 0.005881424 |
| ENST00000376040 | ENSG00000135040 (NAA35)   | hsa-miR-146a-5p | 0.72841     |
| UTR3            | 9:88573457-88573481       |                 | 0.078262116 |
| ENST00000375321 | ENSG00000107968 (MAP3K8)  | hsa-miR-146a-5p | 0.728219    |
| UTR3            | 10:30749949-30749970      |                 | 0.023472576 |
| UTR3            | 10:30739370-30739397      |                 | 0.015400193 |
| ENST00000298198 | ENSG00000165434 (PGM2L1)  | hsa-miR-146a-5p | 0.727476    |
| UTR3            | 11:74046996-74047021      |                 | 0.002778655 |
| UTR3            | 11:74046985-74047011      |                 | 0.002527521 |
| UTR3            | 11:74045883-74045898      |                 | 0.011609185 |
| UTR3            | 11:74045551-74045566      |                 | 0.001825589 |
| UTR3            | 11:74044365-74044380      |                 | 0.001901888 |
| UTR3            | 11:74041496-74041520      |                 | 0.006110285 |
| ENST00000273666 | ENSG00000145087 (STXBP5L) | hsa-miR-146a-5p | 0.727135    |
| UTR3            | 3:121138547-121138574     |                 | 0.003957856 |
| UTR3            | 3:121139695-121139714     |                 | 0.007813951 |
| UTR3            | 3:121140171-121140196     |                 | 0.002295955 |
| UTR3            | 3:121140667-121140695     |                 | 0.001290831 |
| UTR3            | 3:121141557-121141583     |                 | 0.001319065 |
| UTR3            | 3:121141584-121141605     |                 | 0.001087527 |
| UTR3            | 3:121142413-121142432     |                 | 0.002532684 |
| UTR3            | 3:121142920-121142936     |                 | 0.0056564   |

|                 |                            |                 |             |
|-----------------|----------------------------|-----------------|-------------|
| UTR3            | 3:120628538-120628564      |                 | 0.003783782 |
| ENST00000607197 | ENSG00000051620 (HEBP2)    | hsa-miR-146a-5p | 0.727103    |
| UTR3            | 6:138740959-138740983      |                 | 0.006811306 |
| UTR3            | 6:138741689-138741710      |                 | 0.001589795 |
| UTR3            | 6:138742862-138742885      |                 | 0.01832135  |
| ENST00000312431 | ENSG00000151914 (DST)      | hsa-miR-146a-5p | 0.727026    |
| UTR3            | 6:56417400-56417421        |                 | 0.001895465 |
| UTR3            | 6:56357206-56357224        |                 | 0.003104473 |
| UTR3            | 6:56352005-56352031        |                 | 0.0020256   |
| UTR3            | 6:56323888-56323905        |                 | 0.003168137 |
| UTR3            | 6:56322923-56322944        |                 | 0.008240217 |
| UTR3            | 6:56473076-56473090        |                 | 0.017161522 |
| UTR3            | 6:56438542-56438554        |                 | 0.016780119 |
| ENST00000392054 | ENSG00000153823 (PID1)     | hsa-miR-146a-5p | 0.72685     |
| UTR3            | 2:229890085-229890103      |                 | 0.004555012 |
| UTR3            | 2:229889168-229889181      |                 | 0.022146538 |
|                 | ENSG00000197414            |                 |             |
| ENST00000316397 | (GOLGA6L1)                 | hsa-miR-146a-5p | 0.726818    |
| UTR3            | 15:22744730-22744745       |                 | 0.009591    |
| UTR3            | 15:22744977-22744996       |                 | 0.006945674 |
| UTR3            | 15:22745756-22745770       |                 | 0.010162249 |
| ENST00000369681 | ENSG00000065615 (CYB5R4)   | hsa-miR-146a-5p | 0.72614     |
| UTR3            | 6:84671167-84671181        |                 | 0.002569469 |
| UTR3            | 6:84671178-84671201        |                 | 0.00252392  |
| UTR3            | 6:84671467-84671488        |                 | 0.002347885 |
| UTR3            | 6:84672095-84672122        |                 | 0.001861066 |
| UTR3            | 6:84672545-84672561        |                 | 0.001644236 |
| UTR3            | 6:84673371-84673391        |                 | 0.00522266  |
| UTR3            | 6:84673601-84673617        |                 | 0.003295376 |
| UTR3            | 6:84675544-84675558        |                 | 0.003676758 |
| UTR3            | 6:84665124-84665138        |                 | 0.016006377 |
| ENST00000231721 | ENSG00000010319 (SEMA3G)   | hsa-miR-146a-5p | 0.725983    |
| UTR3            | 3:52469351-52469376        |                 | 0.025347128 |
| UTR3            | 3:52467995-52468019        |                 | 0.001283177 |
| ENST00000514176 | ENSG00000109805 (NCAPG)    | hsa-miR-146a-5p | 0.725971    |
| UTR3            | 4:17818994-17819012        |                 | 0.011998186 |
| UTR3            | 4:17838817-17838834        |                 | 0.006128265 |
| UTR3            | 4:17845019-17845031        |                 | 0.008502861 |
| ENST00000388825 | ENSG00000211445 (GPX3)     | hsa-miR-146a-5p | 0.725339    |
| UTR3            | 5:150408013-150408033      |                 | 0.018362035 |
| UTR3            | 5:150408253-150408269      |                 | 0.008215348 |
| ENST00000465254 | ENSG00000189367 (KIAA0408) | hsa-miR-146a-5p | 0.725324    |
| UTR3            | 6:127765166-127765182      |                 | 0.00619066  |
| UTR3            | 6:127764154-127764173      |                 | 0.002408908 |
| UTR3            | 6:127762530-127762552      |                 | 0.017976614 |

|                 |                           |                 |          |
|-----------------|---------------------------|-----------------|----------|
| ENST00000371117 | ENSG00000170927 (PKHD1)   | hsa-miR-146a-5p | 0.725256 |
| UTR3            | 6:51483224-51483246       | 0.003063342     |          |
| UTR3            | 6:51480990-51481010       | 0.004959784     |          |
| UTR3            | 6:51927354-51927370       | 0.013182963     |          |
| UTR3            | 6:51875229-51875257       | 0.04253556      |          |
| UTR3            | 6:51695668-51695689       | 0.006143828     |          |
| ENST00000367996 | ENSG00000158859 (ADAMTS4) | hsa-miR-146a-5p | 0.725243 |
| UTR3            | 1:161160210-161160230     | 0.002278636     |          |
| UTR3            | 1:161159616-161159643     | 0.001811067     |          |
| UTR3            | 1:161156829-161156846     | 0.00205079      |          |
| UTR3            | 1:161156298-161156318     | 0.002759304     |          |
| UTR3            | 1:161154101-161154123     | 0.016436043     |          |
| UTR3            | 1:161163537-161163563     | 0.005959314     |          |
| ENST00000411937 | ENSG00000170390 (DCLK2)   | hsa-miR-146a-5p | 0.725224 |
| UTR3            | 4:151178507-151178526     | 0.026567943     |          |
| ENST00000291825 | ENSG00000105227 (PRX)     | hsa-miR-146a-5p | 0.724766 |
| UTR3            | 19:40903783-40903806      | 0.010920553     |          |
| UTR3            | 19:40903768-40903794      | 0.008143914     |          |
| UTR3            | 19:40901464-40901482      | 0.007465992     |          |
| ENST00000373191 | ENSG00000126070 (AGO3)    | hsa-miR-146a-5p | 0.72474  |
| UTR3            | 1:36522106-36522129       | 0.016083051     |          |
| UTR3            | 1:36525752-36525770       | 0.001010397     |          |
| UTR3            | 1:36532580-36532603       | 0.001010097     |          |
| UTR3            | 1:36532963-36532978       | 0.002197626     |          |
| UTR3            | 1:36534002-36534024       | 0.001291508     |          |
| UTR3            | 1:36535016-36535041       | 0.004935648     |          |
| ENST00000497136 | ENSG00000120008 (WDR11)   | hsa-miR-146a-5p | 0.724431 |
| UTR3            | 10:122665424-122665451    | 0.002998541     |          |
| UTR3            | 10:122665467-122665489    | 0.00059876      |          |
| UTR3            | 10:122665568-122665594    | 0.000513586     |          |
| UTR3            | 10:122668128-122668144    | 0.007870633     |          |
| UTR3            | 10:122668527-122668554    | 0.005164918     |          |
| UTR3            | 10:122668597-122668617    | 0.002771677     |          |
| UTR3            | 10:122668910-122668930    | 0.006584875     |          |
| ENST00000371464 | ENSG00000138207 (RBP4)    | hsa-miR-146a-5p | 0.723963 |
| UTR3            | 10:95351581-95351607      | 0.025224947     |          |
| UTR3            | 10:95360481-95360493      | 0.005971435     |          |
| ENST00000338983 | ENSG00000091436 (MLTK)    | hsa-miR-146a-5p | 0.723639 |
| UTR3            | 2:174087078-174087096     | 0.012309652     |          |
| UTR3            | 2:174087552-174087568     | 0.001547266     |          |
| UTR3            | 2:174089347-174089373     | 0.002499978     |          |
| UTR3            | 2:174091323-174091337     | 0.003076922     |          |
| UTR3            | 2:174091608-174091613     | 0.007004375     |          |
| ENST00000396065 | ENSG00000140297 (GCNT3)   | hsa-miR-146a-5p | 0.723307 |
| UTR3            | 15:59911928-59911952      | 0.002807163     |          |
| UTR3            | 15:59911964-59911991      | 0.004228182     |          |

|                 |                                |                 |             |
|-----------------|--------------------------------|-----------------|-------------|
| UTR3            | 15:59912268-59912285           |                 | 0.003646424 |
| UTR3            | 15:59912309-59912335           |                 | 0.015729345 |
| ENST00000445930 | ENSG00000100519 (PSMC6)        | hsa-miR-146a-5p | 0.723163    |
| UTR3            | 14:53194687-53194707           |                 | 0.026399359 |
| ENST00000374045 | ENSG00000181634 (TNFSF15)      | hsa-miR-146a-5p | 0.723126    |
| UTR3            | 9:117551105-117551126          |                 | 0.001187995 |
| UTR3            | 9:117550749-117550761          |                 | 0.001869002 |
| UTR3            | 9:117550664-117550690          |                 | 0.001096389 |
| UTR3            | 9:117550480-117550507          |                 | 0.002405811 |
| UTR3            | 9:117549598-117549618          |                 | 0.001500167 |
| UTR3            | 9:117548772-117548793          |                 | 0.014787199 |
| UTR3            | 9:117547890-117547908          |                 | 0.001703009 |
| UTR3            | 9:117547701-117547719          |                 | 0.001846717 |
| ENST00000522372 | ENSG00000215262 (KCNU1)        | hsa-miR-146a-5p | 0.723029    |
| UTR3            | 8:36793125-36793141            |                 | 0.02638842  |
| ENST00000225719 | ENSG00000108582 (CPD)          | hsa-miR-146a-5p | 0.722677    |
| UTR3            | 17:28793275-28793294           |                 | 0.001939602 |
| UTR3            | 17:28794048-28794073           |                 | 0.001734219 |
| UTR3            | 17:28794769-28794788           |                 | 0.002229838 |
| UTR3            | 17:28796863-28796886           |                 | 0.006429324 |
| UTR3            | 17:28796955-28796979           |                 | 0.01402673  |
| ENST00000327835 | ENSG00000164684 (ZNF704)       | hsa-miR-146a-5p | 0.72258     |
| UTR3            | 8:81552311-81552337            |                 | 0.001598726 |
| UTR3            | 8:81550731-81550757            |                 | 0.002707824 |
| UTR3            | 8:81549058-81549085            |                 | 0.002154335 |
| UTR3            | 8:81548321-81548341            |                 | 0.003371963 |
| UTR3            | 8:81545746-81545770            |                 | 0.006002798 |
| UTR3            | 8:81542010-81542030            |                 | 0.002140493 |
| UTR3            | 8:81541699-81541725            |                 | 0.003310561 |
| UTR3            | 8:81541355-81541370            |                 | 0.005065047 |
| ENST00000337190 | ENSG00000123933 (MXD4)         | hsa-miR-146a-5p | 0.722415    |
| UTR3            | 4:2252207-2252230              |                 | 0.014780699 |
| UTR3            | 4:2251996-2252013              |                 | 0.008523784 |
| UTR3            | 4:2251236-2251256              |                 | 0.001775334 |
| UTR3            | 4:2250742-2250765              |                 | 0.001258486 |
| ENST00000537989 | ENSG00000112182 (BACH2)        | hsa-miR-146a-5p | 0.722211    |
| UTR3            | 6:90641808-90641826            |                 | 0.005504197 |
| UTR3            | 6:90641618-90641642            |                 | 0.007590394 |
| UTR3            | 6:90641592-90641616            |                 | 0.004668391 |
| UTR3            | 6:90639242-90639264            |                 | 0.001268894 |
| UTR3            | 6:90638042-90638068            |                 | 0.00158229  |
| UTR3            | 6:90636750-90636777            |                 | 0.0045142   |
| UTR3            | 6:90660188-90660205            |                 | 0.005733717 |
| ENST00000488729 | ENSG00000134313<br>(KIDINS220) | hsa-miR-146a-5p | 0.722204    |
| UTR3            | 2:8953395-8953420              |                 | 0.005051681 |

|                 |                                 |                 |             |
|-----------------|---------------------------------|-----------------|-------------|
| UTR3            | 2:8931277-8931295               |                 | 0.002071019 |
| UTR3            | 2:8930137-8930156               |                 | 0.005304765 |
| UTR3            | 2:8871383-8871400               |                 | 0.01153972  |
| UTR3            | 2:8871037-8871062               |                 | 0.002353901 |
| ENST00000381254 | ENSG00000178295 (GEN1)          | hsa-miR-146a-5p | 0.722141    |
| UTR3            | 2:17963285-17963311             |                 | 0.005798488 |
| UTR3            | 2:17964000-17964021             |                 | 0.004782558 |
| UTR3            | 2:17965596-17965616             |                 | 0.002272135 |
| UTR3            | 2:17962927-17962953             |                 | 0.02968433  |
| UTR3            | 2:17963080-17963102             |                 | 0.012267818 |
| UTR3            | 2:17963085-17963111             |                 | 0.007195161 |
| ENST00000351217 | ENSG00000156642 (NPTN)          | hsa-miR-146a-5p | 0.722017    |
| UTR3            | 15:73853320-73853340            |                 | 0.004761932 |
| UTR3            | 15:73852471-73852486            |                 | 0.021543923 |
| ENST00000450363 | ENSG00000072041 (SLC6A15)       | hsa-miR-146a-5p | 0.721984    |
| UTR3            | 12:85277323-85277343            |                 | 0.023612735 |
| UTR3            | 12:85275932-85275952            |                 | 0.001509941 |
| UTR3            | 12:85275827-85275848            |                 | 0.00118052  |
| ENST00000536534 | ENSG00000180287 (PLD5)          | hsa-miR-146a-5p | 0.721641    |
| UTR3            | 1:242252564-242252579           |                 | 0.00366527  |
| UTR3            | 1:242250768-242250789           |                 | 0.018114574 |
| UTR3            | 1:242249920-242249937           |                 | 0.001503777 |
| UTR3            | 1:242248735-242248762           |                 | 0.001708895 |
| UTR3            | 1:242247751-242247774           |                 | 0.001282744 |
| ENST00000451905 | ENSG00000233539<br>(AC011294.3) | hsa-miR-146a-5p | 0.721522    |
| UTR3            | 7:46727686-46727700             |                 | 0.014462619 |
| UTR3            | 7:46727666-46727689             |                 | 0.011803022 |
| ENST00000369498 | ENSG00000165775 (FUNDC2)        | hsa-miR-146a-5p | 0.721463    |
| UTR3            | X:154286092-154286103           |                 | 0.001252906 |
| UTR3            | X:154286775-154286800           |                 | 0.00154851  |
| UTR3            | X:154286892-154286916           |                 | 0.000626569 |
| UTR3            | X:154288115-154288135           |                 | 0.022832822 |
| ENST00000338700 | ENSG00000109654 (TRIM2)         | hsa-miR-146a-5p | 0.721435    |
| UTR3            | 4:154256161-154256179           |                 | 0.005162217 |
| UTR3            | 4:154256702-154256728           |                 | 0.002949663 |
| UTR3            | 4:154260045-154260065           |                 | 0.018146628 |
| ENST00000396150 | ENSG00000083828 (ZNF586)        | hsa-miR-146a-5p | 0.721137    |
| UTR3            | 19:58291564-58291586            |                 | 0.020584107 |
| UTR3            | 19:58291715-58291730            |                 | 0.005650221 |
| ENST00000335056 | ENSG00000104970 (KIR3DX1)       | hsa-miR-146a-5p | 0.720991    |
| UTR3            | 19:55055482-55055495            |                 | 0.010838469 |
| UTR3            | 19:55055855-55055882            |                 | 0.009406111 |
| UTR3            | 19:55055995-55056008            |                 | 0.002411176 |

|                 |                           |                 |             |
|-----------------|---------------------------|-----------------|-------------|
| UTR3            | 19:55056091-55056115      |                 | 0.00239749  |
| UTR3            | 19:55044953-55044969      |                 | 0.005606962 |
| ENST00000392583 | ENSG00000111335 (OAS2)    | hsa-miR-146a-5p | 0.720866    |
| UTR3            | 12:113447712-113447731    |                 | 0.004653492 |
| UTR3            | 12:113447755-113447766    |                 | 0.002390687 |
| UTR3            | 12:113448216-113448241    |                 | 0.011087402 |
| UTR3            | 12:113448613-113448639    |                 | 0.008080673 |
| ENST00000263636 | ENSG00000054219 (LY75)    | hsa-miR-146a-5p | 0.720497    |
| UTR3            | 2:160660002-160660028     |                 | 0.015852195 |
| UTR3            | 2:160673426-160673446     |                 | 0.012881021 |
| UTR3            | 2:160661677-160661701     |                 | 0.027181369 |
| ENST00000359202 | ENSG00000132446 (FTHL17)  | hsa-miR-146a-5p | 0.720432    |
| UTR3            | X:31089432-31089450       |                 | 0.004831089 |
| UTR3            | X:31089377-31089387       |                 | 0.021345935 |
| ENST00000315571 | ENSG00000179241 (LDLRAD3) | hsa-miR-146a-5p | 0.720249    |
| UTR3            | 11:36251681-36251704      |                 | 0.014549684 |
| UTR3            | 11:36253421-36253439      |                 | 0.005270181 |
| UTR3            | 11:36119989-36120009      |                 | 0.026808001 |
| ENST00000425538 | ENSG00000141052 (MYOCD)   | hsa-miR-146a-5p | 0.720246    |
| UTR3            | 17:12667175-12667201      |                 | 0.006378475 |
| UTR3            | 17:12667259-12667276      |                 | 0.004177591 |
| UTR3            | 17:12667294-12667317      |                 | 0.003088802 |
| UTR3            | 17:12668069-12668095      |                 | 0.001185617 |
| UTR3            | 17:12668982-12668995      |                 | 0.002628447 |
| UTR3            | 17:12670426-12670442      |                 | 0.001293842 |
| UTR3            | 17:12671385-12671408      |                 | 0.001926563 |
| UTR3            | 17:12672060-12672076      |                 | 0.005482622 |
| ENST00000341861 | ENSG00000074603 (DPP8)    | hsa-miR-146a-5p | 0.719517    |
| UTR3            | 15:65738580-65738600      |                 | 0.003944539 |
| UTR3            | 15:65737613-65737628      |                 | 0.002330516 |
| UTR3            | 15:65735775-65735801      |                 | 0.008882991 |
| UTR3            | 15:65735743-65735769      |                 | 0.00189357  |
| UTR3            | 15:65735679-65735698      |                 | 0.002084898 |
| UTR3            | 15:65734904-65734921      |                 | 0.006966326 |
| ENST00000376387 | ENSG00000125304 (TM9SF2)  | hsa-miR-146a-5p | 0.719299    |
| UTR3            | 13:100215232-100215243    |                 | 0.026085263 |
| ENST00000529193 | ENSG00000157613 (CREB3L1) | hsa-miR-146a-5p | 0.719048    |
| UTR3            | 11:46342461-46342486      |                 | 0.020980148 |
| UTR3            | 11:46342504-46342521      |                 | 0.00393429  |
| UTR3            | 11:46338953-46338973      |                 | 0.005497625 |
| ENST00000439924 | ENSG00000182149 (IST1)    | hsa-miR-146a-5p | 0.718969    |
| UTR3            | 16:71956536-71956562      |                 | 0.006790926 |
| UTR3            | 16:71961859-71961885      |                 | 0.01079788  |
| UTR3            | 16:71962168-71962190      |                 | 0.002560685 |

|                 |                            |                 |             |
|-----------------|----------------------------|-----------------|-------------|
| UTR3            | 16:71962343-71962370       |                 | 0.005909015 |
| ENST00000323037 | ENSG00000180233 (ZNR2F2)   | hsa-miR-146a-5p | 0.718846    |
| UTR3            | 7:30405972-30405989        |                 | 0.020747647 |
| UTR3            | 7:30406559-30406572        |                 | 0.005300892 |
| ENST00000334082 | ENSG00000152413 (HOMER1)   | hsa-miR-146a-5p | 0.718661    |
| UTR3            | 5:78671360-78671377        |                 | 0.006638862 |
| UTR3            | 5:78671185-78671208        |                 | 0.003777381 |
| UTR3            | 5:78670634-78670660        |                 | 0.002604742 |
| UTR3            | 5:78669262-78669288        |                 | 0.002572374 |
| UTR3            | 5:78669082-78669091        |                 | 0.005480701 |
| UTR3            | 5:78668889-78668912        |                 | 0.004959565 |
| ENST00000396368 | ENSG00000166783 (KIAA0430) | hsa-miR-146a-5p | 0.718614    |
| UTR3            | 16:15689067-15689088       |                 | 0.020750935 |
| UTR3            | 16:15718747-15718768       |                 | 0.01085051  |
| UTR3            | 16:15703543-15703558       |                 | 0.011943225 |
| ENST00000436636 | ENSG00000154310 (TNIK)     | hsa-miR-146a-5p | 0.718146    |
| UTR3            | 3:170780592-170780612      |                 | 0.00227554  |
| UTR3            | 3:170780533-170780543      |                 | 0.001935208 |
| UTR3            | 3:170779648-170779671      |                 | 0.018696733 |
| UTR3            | 3:170779604-170779630      |                 | 0.003084497 |
| ENST00000607544 | ENSG00000226763 (SRRM5)    | hsa-miR-146a-5p | 0.718118    |
| UTR3            | 19:44118535-44118554       |                 | 0.025989759 |
| ENST00000382177 | ENSG00000159459 (UBR1)     | hsa-miR-146a-5p | 0.71782     |
| UTR3            | 15:43317119-43317143       |                 | 0.008144251 |
| UTR3            | 15:43262730-43262756       |                 | 0.002677494 |
| UTR3            | 15:43244572-43244596       |                 | 0.009041734 |
| UTR3            | 15:43236909-43236934       |                 | 0.001179033 |
| UTR3            | 15:43236834-43236860       |                 | 0.002406252 |
| UTR3            | 15:43235585-43235599       |                 | 0.002516951 |
| ENST00000483141 | ENSG00000101473 (ACOT8)    | hsa-miR-146a-5p | 0.717691    |
| UTR3            | 20:44471689-44471715       |                 | 0.022248996 |
| UTR3            | 20:44471463-44471484       |                 | 0.003706303 |
| ENST00000427134 | ENSG00000204308 (RNF5)     | hsa-miR-146a-5p | 0.717488    |
| UTR3            | 6:32151186-32151213        |                 | 0.025938944 |
| ENST00000472232 | ENSG00000107262 (BAG1)     | hsa-miR-146a-5p | 0.717318    |
| UTR3            | 9:33255074-33255092        |                 | 0.023121762 |
| UTR3            | 9:33254419-33254439        |                 | 0.002803437 |
| ENST00000399231 | ENSG00000197535 (MYO5A)    | hsa-miR-146a-5p | 0.717068    |
| UTR3            | 15:52604424-52604439       |                 | 0.007706837 |
| UTR3            | 15:52603954-52603978       |                 | 0.001359991 |
| UTR3            | 15:52603418-52603433       |                 | 0.000979016 |
| UTR3            | 15:52602946-52602969       |                 | 0.001978687 |
| UTR3            | 15:52601046-52601066       |                 | 0.006379806 |
| UTR3            | 15:52600982-52601007       |                 | 0.004503038 |
| UTR3            | 15:52600494-52600518       |                 | 0.002997702 |

|                 |                           |                 |          |
|-----------------|---------------------------|-----------------|----------|
| ENST00000336216 | ENSG00000140382 (HMG20A)  | hsa-miR-146a-5p | 0.717008 |
| UTR3            | 15:77776309-77776324      | 0.002792753     |          |
| UTR3            | 15:77776866-77776884      | 0.001921316     |          |
| UTR3            | 15:77777052-77777067      | 0.00566704      |          |
| UTR3            | 15:77777662-77777681      | 0.015519138     |          |
| ENST00000486995 | ENSG00000049883 (PTCD2)   | hsa-miR-146a-5p | 0.716906 |
|                 | 5:71627201;71630845-      |                 |          |
| UTR3            | 71627202;71630865         | 0.002703114     |          |
| UTR3            | 5:71638810-71638823       | 0.004133965     |          |
| UTR3            | 5:71648547-71648572       | 0.001513331     |          |
| UTR3            | 5:71654683-71654699       | 0.004715019     |          |
| UTR3            | 5:71654804-71654828       | 0.007122298     |          |
| UTR3            | 5:71654864-71654890       | 0.004833174     |          |
| UTR3            | 5:71616241-71616260       | 0.004174086     |          |
| ENST00000585916 | ENSG00000078043 (PIAS2)   | hsa-miR-146a-5p | 0.716362 |
| UTR3            | 18:44391578-44391604      | 0.004852735     |          |
| UTR3            | 18:44391402-44391422      | 0.002690861     |          |
| UTR3            | 18:44391302-44391325      | 0.003125522     |          |
| UTR3            | 18:44390821-44390842      | 0.003965566     |          |
| UTR3            | 18:44390690-44390701      | 0.001444115     |          |
| UTR3            | 18:44470561-44470588      | 0.020678038     |          |
|                 | 18:44401028;44407922-     |                 |          |
| UTR3            | 44401035;44407935         | 0.017389033     |          |
| ENST00000304032 | ENSG00000157985 (AGAP1)   | hsa-miR-146a-5p | 0.716136 |
| UTR3            | 2:237036104-237036126     | 0.002784975     |          |
| UTR3            | 2:237036171-237036197     | 0.000876893     |          |
| UTR3            | 2:237036828-237036852     | 0.001173276     |          |
| UTR3            | 2:237039426-237039442     | 0.002920315     |          |
| UTR3            | 2:237039928-237039950     | 0.018074637     |          |
|                 | ENSG00000123427           |                 |          |
| ENST00000333012 | (METTL21B)                | hsa-miR-146a-5p | 0.716069 |
| UTR3            | 12:58174434-58174452      | 0.00402399      |          |
| UTR3            | 12:58174656-58174683      | 0.009181485     |          |
| UTR3            | 12:58175824-58175836      | 0.005253402     |          |
| UTR3            | 12:58176022-58176042      | 0.003554498     |          |
| UTR3            | 12:58176022-58176050      | 0.003811267     |          |
| ENST00000503329 | ENSG00000172901 (AQPEP)   | hsa-miR-146a-5p | 0.715943 |
| UTR3            | 5:115341551-115341573     | 0.020732803     |          |
| UTR3            | 5:115361939-115361960     | 0.001944679     |          |
| UTR3            | 5:115362826-115362853     | 0.003137082     |          |
| ENST00000592623 | ENSG00000115268 (RPS15)   | hsa-miR-146a-5p | 0.715613 |
| UTR3            | 19:1440368-1440382        | 0.025788045     |          |
| ENST00000312377 | ENSG00000161800 (RACGAP1) | hsa-miR-146a-5p | 0.715538 |
| UTR3            | 12:50383546-50383560      | 0.025782028     |          |
| ENST00000252252 | ENSG00000185479 (KRT6B)   | hsa-miR-146a-5p | 0.715523 |



|                 |                           |                 |             |
|-----------------|---------------------------|-----------------|-------------|
| UTR3            | 12:52840830-52840848      |                 | 0.004614934 |
| UTR3            | 12:52840584-52840598      |                 | 0.021165887 |
| ENST00000561038 | ENSG00000100938 (GMPR2)   | hsa-miR-146a-5p | 0.715041    |
|                 | 14:24703432;24704943-     |                 |             |
| UTR3            | 24703447;24704947         |                 | 0.018359543 |
| UTR3            | 14:24707666-24707692      |                 | 0.007382606 |
| ENST00000562435 | ENSG00000171208 (NETO2)   | hsa-miR-146a-5p | 0.714807    |
| UTR3            | 16:47116434-47116456      |                 | 0.003135125 |
| UTR3            | 16:47115557-47115581      |                 | 0.002761684 |
| UTR3            | 16:47115491-47115509      |                 | 0.001229274 |
| UTR3            | 16:47113775-47113803      |                 | 0.00271124  |
| UTR3            | 16:47111638-47111661      |                 | 0.01588606  |
| ENST00000414099 | ENSG00000183873 (SCN5A)   | hsa-miR-146a-5p | 0.714582    |
| UTR3            | 3:38591357-38591385       |                 | 0.010033587 |
| UTR3            | 3:38590608-38590627       |                 | 0.004340165 |
| UTR3            | 3:38590048-38590075       |                 | 0.011331559 |
| ENST00000399138 | ENSG00000091542 (ALKBH5)  | hsa-miR-146a-5p | 0.714412    |
| UTR3            | 17:18111886-18111905      |                 | 0.019185963 |
| UTR3            | 17:18112176-18112199      |                 | 0.003441018 |
| UTR3            | 17:18113109-18113126      |                 | 0.00306473  |
| ENST00000417640 | ENSG00000123119 (NECAB1)  | hsa-miR-146a-5p | 0.714071    |
| UTR3            | 8:91967924-91967946       |                 | 0.005064738 |
| UTR3            | 8:91969015-91969033       |                 | 0.003099428 |
| UTR3            | 8:91969066-91969089       |                 | 0.007496204 |
| UTR3            | 8:91971091-91971102       |                 | 0.007945032 |
| UTR3            | 8:91836986-91837001       |                 | 0.009519732 |
| ENST00000369443 | ENSG00000196505 (GDAP2)   | hsa-miR-146a-5p | 0.713835    |
| UTR3            | 1:118410920-118410934     |                 | 0.001750168 |
| UTR3            | 1:118410232-118410251     |                 | 0.001116296 |
| UTR3            | 1:118409233-118409250     |                 | 0.001067352 |
| UTR3            | 1:118408982-118409003     |                 | 0.001475156 |
| UTR3            | 1:118408893-118408921     |                 | 0.00062145  |
| UTR3            | 1:118407395-118407415     |                 | 0.001835208 |
| UTR3            | 1:118406934-118406957     |                 | 0.003906327 |
| UTR3            | 1:118406757-118406778     |                 | 0.004943286 |
| UTR3            | 1:118406267-118406280     |                 | 0.008930254 |
| ENST00000334241 | ENSG00000186300 (ZNF555)  | hsa-miR-146a-5p | 0.713464    |
| UTR3            | 19:2854824-2854846        |                 | 0.002183291 |
| UTR3            | 19:2856751-2856771        |                 | 0.0029283   |
| UTR3            | 19:2856784-2856811        |                 | 0.005779217 |
| UTR3            | 19:2857035-2857054        |                 | 0.001350279 |
| UTR3            | 19:2858549-2858567        |                 | 0.009083549 |
| UTR3            | 19:2859642-2859662        |                 | 0.004291216 |
| ENST00000317605 | ENSG00000181541 (MAB21L2) | hsa-miR-146a-5p | 0.713391    |

|                 |                                               |                 |             |          |
|-----------------|-----------------------------------------------|-----------------|-------------|----------|
| UTR3            | 4:151505726-151505745                         |                 | 0.025609967 |          |
| ENST00000397762 | ENSG00000129472 (RAB2B)                       | hsa-miR-146a-5p |             | 0.713046 |
| UTR3            | 14:21928652-21928671                          |                 | 0.005444332 |          |
| UTR3            | 14:21927494-21927516                          |                 | 0.016026036 |          |
| UTR3            | 14:21927271-21927289                          |                 | 0.004112104 |          |
| ENST00000368936 | ENSG00000143363 (PRUNE)                       | hsa-miR-146a-5p |             | 0.712834 |
| UTR3            | 1:151006808-151006832                         |                 | 0.02556549  |          |
| ENST00000479198 | ENSG00000163630 (SYNPR)                       | hsa-miR-146a-5p |             | 0.712473 |
| UTR3            | 3:63602188-63602214                           |                 | 0.005318345 |          |
| UTR3            | 3:63602292-63602308                           |                 | 0.020218365 |          |
| ENST00000532428 | ENSG00000149089 (APIP)                        | hsa-miR-146a-5p |             | 0.712459 |
| UTR3            | 11:34877794-34877815                          |                 | 0.009787496 |          |
| UTR3            | 11:34876948-34876968                          |                 | 0.002163944 |          |
| UTR3            | 11:34874829-34874857                          |                 | 0.013584102 |          |
| ENST00000462898 | ENSG00000051382 (PIK3CB)                      | hsa-miR-146a-5p |             | 0.71242  |
| UTR3            | 3:138452279;138453476-<br>138452280;138453500 |                 | 0.005770467 |          |
| UTR3            | 3:138409968;138413628-<br>138409985;138413637 |                 | 0.001935952 |          |
| UTR3            | 3:138474665-138474685                         |                 | 0.059121434 |          |
| ENST00000428443 | ENSG00000187231 (SESTD1)                      | hsa-miR-146a-5p |             | 0.71224  |
| UTR3            | 2:179973763-179973781                         |                 | 0.003698019 |          |
| UTR3            | 2:179972630-179972652                         |                 | 0.00150294  |          |
| UTR3            | 2:179971399-179971413                         |                 | 0.0020344   |          |
| UTR3            | 2:179971078-179971086                         |                 | 0.001146653 |          |
| UTR3            | 2:179969095-179969114                         |                 | 0.001346571 |          |
| UTR3            | 2:179968898-179968923                         |                 | 0.001516781 |          |
| UTR3            | 2:179968839-179968864                         |                 | 0.000798582 |          |
| UTR3            | 2:179966867-179966892                         |                 | 0.013474133 |          |
| ENST00000602786 | ENSG00000120694 (HSPH1)                       | hsa-miR-146a-5p |             | 0.712226 |
| UTR3            | 13:31722177-31722205                          |                 | 0.025516982 |          |
| ENST00000512701 | ENSG00000155158 (TTC39B)                      | hsa-miR-146a-5p |             | 0.711609 |
| UTR3            | 9:15167380-15167406                           |                 | 0.001481228 |          |
| UTR3            | 9:15165746-15165760                           |                 | 0.001427863 |          |
| UTR3            | 9:15165726-15165749                           |                 | 0.002416139 |          |
| UTR3            | 9:15165591-15165606                           |                 | 0.000686969 |          |
| UTR3            | 9:15164880-15164904                           |                 | 0.00246548  |          |
| UTR3            | 9:15164804-15164832                           |                 | 0.002131546 |          |
| UTR3            | 9:15164547-15164565                           |                 | 0.002802147 |          |
| UTR3            | 9:15164236-15164252                           |                 | 0.00442806  |          |
| UTR3            | 9:15163967-15163982                           |                 | 0.002881567 |          |
| UTR3            | 9:15163703-15163728                           |                 | 0.004746804 |          |
| ENST00000369663 | ENSG00000112837 (TBX18)                       | hsa-miR-146a-5p |             | 0.711572 |
| UTR3            | 6:85446114-85446134                           |                 | 0.021991993 |          |
| UTR3            | 6:85442757-85442770                           |                 | 0.003472913 |          |
| ENST00000608469 | ENSG00000134365 (CFHR4)                       | hsa-miR-146a-5p |             | 0.711106 |
| UTR3            | 1:196887675-196887691                         |                 | 0.025427749 |          |

|                 |                                           |                 |          |
|-----------------|-------------------------------------------|-----------------|----------|
| ENST00000296257 | ENSG00000163904 (SENP2)                   | hsa-miR-146a-5p | 0.710996 |
| UTR3            | 3:185347716-185347737                     | 0.009809193     |          |
| UTR3            | 3:185349674-185349689                     | 0.005097237     |          |
| UTR3            | 3:185350722-185350746                     | 0.00335592      |          |
| UTR3            | 3:185327121;185329439-185327138;185329444 | 0.0292191       |          |
| ENST00000286428 | ENSG00000155959 (VBP1)                    | hsa-miR-146a-5p | 0.710455 |
| UTR3            | X:154467826-154467833                     | 0.025375987     |          |
| ENST00000308488 | ENSG00000048649 (RSF1)                    | hsa-miR-146a-5p | 0.710327 |
| UTR3            | 11:77375360-77375387                      | 0.00115089      |          |
| UTR3            | 11:77373796-77373817                      | 0.001433872     |          |
| UTR3            | 11:77372362-77372383                      | 0.002382776     |          |
| UTR3            | 11:77371937-77371952                      | 0.003826515     |          |
| UTR3            | 11:77371615-77371632                      | 0.016571774     |          |
| ENST00000369686 | ENSG00000134245 (WNT2B)                   | hsa-miR-146a-5p | 0.710281 |
| UTR3            | 1:113064590-113064614                     | 0.001858088     |          |
| UTR3            | 1:113065673-113065696                     | 0.002534488     |          |
| UTR3            | 1:113065785-113065806                     | 0.003508181     |          |
| UTR3            | 1:113066795-113066819                     | 0.00215         |          |
| UTR3            | 1:113067104-113067123                     | 0.001973615     |          |
| UTR3            | 1:113067949-113067972                     | 0.001017641     |          |
| UTR3            | 1:113069976-113070003                     | 0.001404489     |          |
| UTR3            | 1:113071925-113071938                     | 0.006273391     |          |
| UTR3            | 1:113072181-113072202                     | 0.004642305     |          |
| ENST00000451899 | ENSG00000164823 (OSGIN2)                  | hsa-miR-146a-5p | 0.710149 |
| UTR3            | 8:90938933-90938950                       | 0.007978669     |          |
| UTR3            | 8:90936971-90936985                       | 0.019805437     |          |
| UTR3            | 8:90937474-90937489                       | 0.038093755     |          |
| ENST00000475381 | ENSG00000144959 (NCEH1)                   | hsa-miR-146a-5p | 0.710146 |
| UTR3            | 3:172348390-172348411                     | 0.003954758     |          |
| UTR3            | 3:172348081-172348100                     | 0.021396739     |          |
| ENST00000296487 | ENSG00000164088 (PPM1M)                   | hsa-miR-146a-5p | 0.710134 |
| UTR3            | 3:52283605-52283622                       | 0.011529361     |          |
| UTR3            | 3:52283673-52283692                       | 0.013821139     |          |
| ENST00000341287 | ENSG00000188674 (C2orf80)                 | hsa-miR-146a-5p | 0.709741 |
| UTR3            | 2:209030119-209030136                     | 0.025319346     |          |
| ENST00000249883 | ENSG00000114019 (AMOTL2)                  | hsa-miR-146a-5p | 0.709734 |
| UTR3            | 3:134076092-134076106                     | 0.004525076     |          |
| UTR3            | 3:134075960-134075986                     | 0.002573719     |          |
| UTR3            | 3:134075177-134075191                     | 0.01821999      |          |
| ENST00000423484 | ENSG00000234444 (ZNF736)                  | hsa-miR-146a-5p | 0.709731 |
| UTR3            | 7:63810125-63810147                       | 0.002558939     |          |
| UTR3            | 7:63810429-63810454                       | 0.0022883       |          |

|                 |                           |                 |             |
|-----------------|---------------------------|-----------------|-------------|
| UTR3            | 7:63810483-63810504       |                 | 0.009482078 |
| UTR3            | 7:63811256-63811273       |                 | 0.001420319 |
| UTR3            | 7:63811539-63811559       |                 | 0.001192906 |
| UTR3            | 7:63808782-63808799       |                 | 0.012779621 |
| UTR3            | 7:63809117-63809135       |                 | 0.008810815 |
| UTR3            | 7:63809455-63809471       |                 | 0.011646785 |
| ENST00000517608 | ENSG00000104343 (UBE2W)   | hsa-miR-146a-5p | 0.709514    |
| UTR3            | 8:74705004-74705027       |                 | 0.005495796 |
| UTR3            | 8:74704469-74704493       |                 | 0.002810388 |
| UTR3            | 8:74704262-74704279       |                 | 0.001907198 |
| UTR3            | 8:74703409-74703427       |                 | 0.001873212 |
| UTR3            | 8:74702447-74702466       |                 | 0.001300952 |
| UTR3            | 8:74701754-74701778       |                 | 0.001567831 |
| UTR3            | 8:74700977-74701004       |                 | 0.001728822 |
| UTR3            | 8:74700944-74700971       |                 | 0.000609613 |
| UTR3            | 8:74699261-74699285       |                 | 0.004001668 |
| UTR3            | 8:74698591-74698605       |                 | 0.004005871 |
|                 | ENSG00000153956           |                 |             |
| ENST00000356860 | (CACNA2D1)                | hsa-miR-146a-5p | 0.708986    |
| UTR3            | 7:81578481-81578498       |                 | 0.017401946 |
| UTR3            | 7:81577606-81577625       |                 | 0.002181764 |
| UTR3            | 7:81575913-81575929       |                 | 0.005675782 |
| ENST00000176763 | ENSG00000072786 (STK10)   | hsa-miR-146a-5p | 0.708664    |
| UTR3            | 5:171471344-171471366     |                 | 0.002517595 |
| UTR3            | 5:171469919-171469935     |                 | 0.002769577 |
| UTR3            | 5:171469803-171469827     |                 | 0.009676107 |
| UTR3            | 5:171469136-171469155     |                 | 0.00839473  |
|                 | 5:171481694;171482592-    |                 |             |
| UTR3            | 171481698;171482614       |                 | 0.008620403 |
|                 |                           |                 |             |
| ENST00000469154 | ENSG00000082014 (SMARCD3) | hsa-miR-146a-5p | 0.708582    |
| UTR3            | 7:150939293-150939318     |                 | 0.019477971 |
| UTR3            | 7:150938530-150938554     |                 | 0.003162988 |
| UTR3            | 7:150937970-150937998     |                 | 0.002586525 |
| ENST00000473989 | ENSG00000157741 (UBN2)    | hsa-miR-146a-5p | 0.708547    |
| UTR3            | 7:138983882-138983908     |                 | 0.002116829 |
| UTR3            | 7:138984635-138984654     |                 | 0.001883594 |
| UTR3            | 7:138984934-138984960     |                 | 0.001813076 |
| UTR3            | 7:138986561-138986575     |                 | 0.007141499 |
| UTR3            | 7:138988747-138988766     |                 | 0.002071541 |
| UTR3            | 7:138990070-138990081     |                 | 0.001792762 |
| UTR3            | 7:138990226-138990246     |                 | 0.001968507 |
| UTR3            | 7:138990610-138990630     |                 | 0.002102894 |
| UTR3            | 7:138991151-138991174     |                 | 0.001560305 |
| UTR3            | 7:138968607-138968632     |                 | 0.012467289 |
|                 |                           |                 |             |
| ENST00000283131 | ENSG00000153147 (SMARCA5) | hsa-miR-146a-5p | 0.70831     |

|                 |                           |                 |             |
|-----------------|---------------------------|-----------------|-------------|
| UTR3            | 4:144475433-144475460     |                 | 0.023631278 |
| UTR3            | 4:144475539-144475562     |                 | 0.001574659 |
| ENST00000334464 | ENSG00000165650 (PDZD8)   | hsa-miR-146a-5p | 0.708023    |
| UTR3            | 10:119041846-119041858    |                 | 0.014480358 |
| UTR3            | 10:119041566-119041588    |                 | 0.00657857  |
| UTR3            | 10:119043413-119043440    |                 | 0.017936468 |
| ENST00000442697 | ENSG00000164031 (DNAJB14) | hsa-miR-146a-5p | 0.707968    |
| UTR3            | 4:100819567-100819584     |                 | 0.001181713 |
| UTR3            | 4:100817413-100817424     |                 | 0.019725039 |
| UTR3            | 4:100851608-100851629     |                 | 0.018513732 |
| ENST00000327946 | ENSG00000182771 (GRID1)   | hsa-miR-146a-5p | 0.707789    |
| UTR3            | 10:87361298-87361312      |                 | 0.007235146 |
| UTR3            | 10:87359492-87359507      |                 | 0.017929661 |
| ENST00000314400 | ENSG00000163608 (C3orf17) | hsa-miR-146a-5p | 0.70741     |
| UTR3            | 3:112723769-112723796     |                 | 0.009343446 |
| UTR3            | 3:112723256-112723281     |                 | 0.002021838 |
| UTR3            | 3:112723233-112723245     |                 | 0.00346225  |
| UTR3            | 3:112721725-112721740     |                 | 0.002143604 |
| UTR3            | 3:112727249-112727275     |                 | 0.021460736 |
| UTR3            | 3:112724669-112724686     |                 | 0.010953925 |
| ENST00000366429 | ENSG00000173421 (CCDC36)  | hsa-miR-146a-5p | 0.707403    |
| UTR3            | 3:49283036-49283043       |                 | 0.025134251 |
| ENST00000382968 | ENSG00000178222 (RNF212)  | hsa-miR-146a-5p | 0.707339    |
| UTR3            | 4:1066426-1066448         |                 | 0.0176062   |
| UTR3            | 4:1065949-1065975         |                 | 0.004561857 |
| UTR3            | 4:1065895-1065920         |                 | 0.002961165 |
| ENST00000427594 | ENSG00000176771 (NCKAP5)  | hsa-miR-146a-5p | 0.707303    |
| UTR3            | 2:133879677-133879692     |                 | 0.00633239  |
| UTR3            | 2:133879657-133879675     |                 | 0.01401701  |
| UTR3            | 2:133887553-133887572     |                 | 0.020436963 |
| ENST00000328945 | ENSG00000184860 (SDR42E1) | hsa-miR-146a-5p | 0.707181    |
| UTR3            | 16:82032668-82032694      |                 | 0.016082651 |
| UTR3            | 16:82031993-82032020      |                 | 0.003112384 |
| UTR3            | 16:82032751-82032771      |                 | 0.024680741 |
| ENST00000380750 | ENSG00000205572 (SERF1B)  | hsa-miR-146a-5p | 0.707083    |
| UTR3            | 5:69337839-69337859       |                 | 0.014277308 |
| UTR3            | 5:69338532-69338550       |                 | 0.006172483 |
| UTR3            | 5:69338645-69338671       |                 | 0.004659243 |
| ENST00000394123 | ENSG00000145907 (G3BP1)   | hsa-miR-146a-5p | 0.706981    |
| UTR3            | 5:151184161-151184187     |                 | 0.003261946 |
| UTR3            | 5:151184819-151184838     |                 | 0.005113378 |
| UTR3            | 5:151186415-151186437     |                 | 0.004335171 |

|                 |                                                 |                 |             |
|-----------------|-------------------------------------------------|-----------------|-------------|
| UTR3            | 5:151186627-151186639                           |                 | 0.00477848  |
| UTR3            | 5:151187109-151187136                           |                 | 0.002131474 |
| UTR3            | 5:151188789-151188814                           |                 | 0.00172792  |
| UTR3            | 5:151189387-151189401                           |                 | 0.001274087 |
| UTR3            | 5:151190798-151190814                           |                 | 0.001455574 |
| UTR3            | 5:151190912-151190927                           |                 | 0.001022971 |
| ENST00000464950 | ENSG00000058799 (YIPF1)<br>1:54317939;54320674- | hsa-miR-146a-5p | 0.706525    |
| UTR3            | 54317943;54320687                               |                 | 0.025064992 |
| ENST00000475390 | ENSG00000121871 (SLITRK3)                       | hsa-miR-146a-5p | 0.706307    |
| UTR3            | 3:164905123-164905137                           |                 | 0.025047824 |
| ENST00000219905 | ENSG00000174197 (MGA)                           | hsa-miR-146a-5p | 0.706246    |
| UTR3            | 15:42060141-42060164                            |                 | 0.010581522 |
| UTR3            | 15:42060607-42060621                            |                 | 0.004584916 |
| UTR3            | 15:42061649-42061672                            |                 | 0.00987661  |
| ENST00000409444 | ENSG00000155755<br>(TMEM237)                    | hsa-miR-146a-5p | 0.705909    |
| UTR3            | 2:202488712-202488723                           |                 | 0.005285775 |
| UTR3            | 2:202488368-202488396                           |                 | 0.0042626   |
| UTR3            | 2:202488343-202488363                           |                 | 0.005739256 |
| UTR3            | 2:202488142-202488155                           |                 | 0.002166953 |
| UTR3            | 2:202487688-202487703                           |                 | 0.007561873 |
| ENST00000396573 | ENSG00000183454 (GRIN2A)                        | hsa-miR-146a-5p | 0.705884    |
| UTR3            | 16:9856625-9856646                              |                 | 0.004416685 |
| UTR3            | 16:9855462-9855482                              |                 | 0.001381727 |
| UTR3            | 16:9852639-9852664                              |                 | 0.015417175 |
| UTR3            | 16:10032108-10032129                            |                 | 0.008409629 |
| UTR3            | 16:10031891-10031910                            |                 | 0.008172272 |
| ENST00000503039 | ENSG00000113761 (ZNF346)                        | hsa-miR-146a-5p | 0.705555    |
| UTR3            | 5:176508148-176508175                           |                 | 0.024988648 |
| ENST00000313234 | ENSG00000167767 (KRT80)                         | hsa-miR-146a-5p | 0.705507    |
| UTR3            | 12:52564182-52564199                            |                 | 0.001235714 |
| UTR3            | 12:52564079-52564107                            |                 | 0.001150523 |
| UTR3            | 12:52563151-52563176                            |                 | 0.009162707 |
| UTR3            | 12:52562985-52563008                            |                 | 0.013435889 |
| ENST00000220597 | ENSG00000076641 (PAG1)                          | hsa-miR-146a-5p | 0.70537     |
| UTR3            | 8:81888635-81888653                             |                 | 0.003713386 |
| UTR3            | 8:81887676-81887690                             |                 | 0.002204876 |
| UTR3            | 8:81885245-81885263                             |                 | 0.002006279 |
| UTR3            | 8:81881129-81881151                             |                 | 0.011722228 |
| UTR3            | 8:81880692-81880713                             |                 | 0.005327333 |
| ENST00000237201 | ENSG00000118434 (SPACA1)                        | hsa-miR-146a-5p | 0.705148    |
| UTR3            | 6:88776237-88776254                             |                 | 0.02495663  |
| ENST00000370550 | ENSG00000153936 (HS2ST1)                        | hsa-miR-146a-5p | 0.705113    |

|                 |                          |                 |             |
|-----------------|--------------------------|-----------------|-------------|
| UTR3            | 1:87570418-87570442      |                 | 0.008976504 |
| UTR3            | 1:87571013-87571032      |                 | 0.004547892 |
| UTR3            | 1:87571431-87571454      |                 | 0.0031361   |
| UTR3            | 1:87573698-87573722      |                 | 0.002181782 |
| UTR3            | 1:87575597-87575615      |                 | 0.006111626 |
| ENST00000225512 | ENSG00000108379 (WNT3)   | hsa-miR-146a-5p | 0.705031    |
| UTR3            | 17:44841739-44841759     |                 | 0.015535959 |
| UTR3            | 17:44841468-44841494     |                 | 0.003709932 |
| UTR3            | 17:44841324-44841341     |                 | 0.002242488 |
| UTR3            | 17:44840699-44840715     |                 | 0.003459043 |
| ENST00000360311 | ENSG00000197385 (ZNF860) | hsa-miR-146a-5p | 0.704803    |
| UTR3            | 3:32032938-32032957      |                 | 0.004455493 |
| UTR3            | 3:32032974-32033000      |                 | 0.01367657  |
| UTR3            | 3:32030774-32030796      |                 | 0.027673547 |
| ENST00000541428 | ENSG00000198363 (ASPH)   | hsa-miR-146a-5p | 0.704397    |
| UTR3            | 8:62415246-62415269      |                 | 0.002123036 |
| UTR3            | 8:62414082-62414102      |                 | 0.018977921 |
| UTR3            | 8:62413553-62413570      |                 | 0.003796677 |
| ENST00000327470 | ENSG00000183161 (FANCF)  | hsa-miR-146a-5p | 0.704277    |
| UTR3            | 11:22646166-22646191     |                 | 0.021722662 |
| UTR3            | 11:22644792-22644807     |                 | 0.003165589 |
| ENST00000278302 | ENSG00000121236 (TRIM6)  | hsa-miR-146a-5p | 0.704159    |
| UTR3            | 11:5632641-5632665       |                 | 0.01501939  |
| UTR3            | 11:5633366-5633391       |                 | 0.009859529 |
| ENST00000296318 | ENSG00000144730 (IL17RD) | hsa-miR-146a-5p | 0.703997    |
| UTR3            | 3:57130277-57130299      |                 | 0.002988282 |
| UTR3            | 3:57129931-57129959      |                 | 0.016469471 |
| UTR3            | 3:57129196-57129205      |                 | 0.00155689  |
| UTR3            | 3:57129162-57129174      |                 | 0.000714052 |
| UTR3            | 3:57128893-57128913      |                 | 0.001405329 |
| UTR3            | 3:57127794-57127819      |                 | 0.001732231 |
| ENST00000334513 | ENSG00000186364 (NUDT17) | hsa-miR-146a-5p | 0.703965    |
| UTR3            | 1:145586129-145586147    |                 | 0.023714463 |
| UTR3            | 1:145588403-145588418    |                 | 0.005327905 |
| ENST00000395811 | ENSG00000133030 (MPRIP)  | hsa-miR-146a-5p | 0.703889    |
| UTR3            | 17:17089714-17089740     |                 | 0.000947979 |
| UTR3            | 17:17090273-17090296     |                 | 0.000970185 |
| UTR3            | 17:17093180-17093203     |                 | 0.002700438 |
| UTR3            | 17:17093563-17093580     |                 | 0.004022018 |
| UTR3            | 17:17095319-17095339     |                 | 0.003270642 |
| UTR3            | 17:17095458-17095481     |                 | 0.011168748 |
| UTR3            | 17:17030079-17030101     |                 | 0.008113679 |
| ENST00000409719 | ENSG00000125611 (CHCHD5) | hsa-miR-146a-5p | 0.703074    |
| UTR3            | 2:113344305-113344328    |                 | 0.005714927 |
| UTR3            | 2:113344369-113344388    |                 | 0.003334216 |

|                 |                            |                 |             |
|-----------------|----------------------------|-----------------|-------------|
| UTR3            | 2:113344839-113344851      |                 | 0.011646731 |
| UTR3            | 2:113345359-113345383      |                 | 0.004098057 |
| ENST00000320238 | ENSG00000177551 (NHLH2)    | hsa-miR-146a-5p | 0.702961    |
| UTR3            | 1:116380433-116380460      |                 | 0.003754205 |
| UTR3            | 1:116380251-116380275      |                 | 0.012474385 |
| UTR3            | 1:116379225-116379248      |                 | 0.008556497 |
| ENST00000480174 | ENSG00000137941 (TTLL7)    | hsa-miR-146a-5p | 0.702712    |
| UTR3            | 1:84372074-84372090        |                 | 0.021906702 |
| UTR3            | 1:84335198-84335213        |                 | 0.002858876 |
| ENST00000311381 | ENSG00000130349 (C6orf203) | hsa-miR-146a-5p | 0.702457    |
| UTR3            | 6:107372505-107372531      |                 | 0.024745631 |
| ENST00000261292 | ENSG00000101670 (LIPG)     | hsa-miR-146a-5p | 0.702387    |
| UTR3            | 18:47116976-47116998       |                 | 0.002354678 |
| UTR3            | 18:47117368-47117390       |                 | 0.006395358 |
| UTR3            | 18:47118588-47118609       |                 | 0.012137497 |
| UTR3            | 18:47119051-47119077       |                 | 0.003852674 |
| ENST00000357637 | ENSG00000197563 (PIGN)     | hsa-miR-146a-5p | 0.702311    |
| UTR3            | 18:59712514-59712536       |                 | 0.002878617 |
| UTR3            | 18:59712504-59712526       |                 | 0.001434815 |
|                 | 18:59774108;59774219-      |                 |             |
| UTR3            | 59774114;59774239          |                 | 0.029385373 |
| UTR3            | 18:59763151-59763169       |                 | 0.008120807 |
| UTR3            | 18:59763143-59763169       |                 | 0.006636351 |
|                 | 18:59756056;59757709-      |                 |             |
| UTR3            | 59756075;59757710          |                 | 0.019731675 |
| ENST00000367342 | ENSG00000163362 (C1orf106) | hsa-miR-146a-5p | 0.702223    |
| UTR3            | 1:200883084-200883102      |                 | 0.004597919 |
| UTR3            | 1:200884156-200884178      |                 | 0.009785827 |
| UTR3            | 1:200884363-200884385      |                 | 0.010343611 |
| ENST00000533482 | ENSG00000113522 (RAD50)    | hsa-miR-146a-5p | 0.702121    |
| UTR3            | 5:131915054-131915073      |                 | 0.014726256 |
| UTR3            | 5:131923722-131923748      |                 | 0.003606611 |
| UTR3            | 5:131978115-131978127      |                 | 0.00638655  |
| ENST00000423058 | ENSG00000144285 (SCN1A)    | hsa-miR-146a-5p | 0.701963    |
| UTR3            | 2:166847536-166847562      |                 | 0.021975956 |
| UTR3            | 2:166909393-166909420      |                 | 0.012136633 |
| ENST00000367895 | ENSG00000112319 (EYA4)     | hsa-miR-146a-5p | 0.701685    |
| UTR3            | 6:133850301-133850323      |                 | 0.005353135 |
| UTR3            | 6:133851189-133851211      |                 | 0.00290307  |
| UTR3            | 6:133851334-133851344      |                 | 0.00173238  |
| UTR3            | 6:133851344-133851371      |                 | 0.00090888  |
| UTR3            | 6:133851496-133851523      |                 | 0.001952821 |
| UTR3            | 6:133853215-133853224      |                 | 0.011835037 |
| ENST00000233336 | ENSG00000114999 (TTL)      | hsa-miR-146a-5p | 0.701679    |
| UTR3            | 2:113287117-113287141      |                 | 0.002889275 |



|                 |                            |                 |             |
|-----------------|----------------------------|-----------------|-------------|
| UTR3            | 2:113289054-113289076      |                 | 0.011267141 |
| UTR3            | 2:113290994-113291007      |                 | 0.004181814 |
| UTR3            | 2:113295494-113295503      |                 | 0.002063608 |
| UTR3            | 2:113295587-113295601      |                 | 0.001113602 |
| UTR3            | 2:113296029-113296055      |                 | 0.001494869 |
| UTR3            | 2:113298365-113298389      |                 | 0.00167457  |
| ENST00000434618 | ENSG00000231925 (TAPBP)    | hsa-miR-146a-5p | 0.701588    |
| UTR3            | 6:33268996-33269017        |                 | 0.02316588  |
| UTR3            | 6:33281009-33281032        |                 | 0.006914784 |
| ENST00000318789 | ENSG00000114861 (FOXP1)    | hsa-miR-146a-5p | 0.701546    |
| UTR3            | 3:71008311-71008328        |                 | 0.007921231 |
| UTR3            | 3:71006634-71006654        |                 | 0.002684158 |
| UTR3            | 3:71005494-71005517        |                 | 0.00208375  |
| UTR3            | 3:71005034-71005050        |                 | 0.007664543 |
| UTR3            | 3:71004672-71004694        |                 | 0.004320792 |
| ENST00000601302 | ENSG00000268223 (ARL14EPL) | hsa-miR-146a-5p | 0.701427    |
| UTR3            | 5:115395495-115395516      |                 | 0.024665163 |
| ENST00000370521 | ENSG00000065243 (PKN2)     | hsa-miR-146a-5p | 0.700675    |
| UTR3            | 1:89301045-89301064        |                 | 0.020493695 |
| UTR3            | 1:89301886-89301906        |                 | 0.004112851 |
| ENST00000206595 | ENSG00000092140 (G2E3)     | hsa-miR-146a-5p | 0.700609    |
| UTR3            | 14:31085932-31085956       |                 | 0.004835105 |
| UTR3            | 14:31087192-31087215       |                 | 0.001772556 |
| UTR3            | 14:31085700-31085724       |                 | 0.058534159 |
| ENST00000349496 | ENSG00000168036 (CTNNB1)   | hsa-miR-146a-5p | 0.70055     |
| UTR3            | 3:41280996-41281013        |                 | 0.024596796 |
| ENST00000380079 | ENSG00000127954 (STEAP4)   | hsa-miR-146a-5p | 0.700486    |
| UTR3            | 7:87907586-87907602        |                 | 0.003676025 |
| UTR3            | 7:87907556-87907573        |                 | 0.003279148 |
| UTR3            | 7:87906073-87906085        |                 | 0.011629472 |
| UTR3            | 7:87913296-87913320        |                 | 0.024700116 |
| ENST00000426077 | ENSG00000226479 (TMEM185B) | hsa-miR-146a-5p | 0.700466    |
| UTR3            | 2:120979090-120979109      |                 | 0.01334669  |
| UTR3            | 2:120978896-120978915      |                 | 0.011243547 |
| ENST00000420627 | ENSG00000196924 (FLNA)     | hsa-miR-146a-5p | 0.70028     |
| UTR3            | X:153590437-153590461      |                 | 0.011915998 |
| UTR3            | X:153590096-153590119      |                 | 0.001218754 |
| UTR3            | X:153576936-153576949      |                 | 0.011441047 |
| ENST00000216877 | ENSG00000132670 (PTPRA)    | hsa-miR-146a-5p | 0.700188    |
| UTR3            | 20:3019131-3019138         |                 | 0.022310316 |
| UTR3            | 20:3019379-3019404         |                 | 0.002258305 |
| ENST00000546931 | ENSG00000170627 (GTSF1)    | hsa-miR-146a-5p | 0.70018     |
| UTR3            | 12:54849888-54849902       |                 | 0.024567978 |

|                 |                           |                 |          |
|-----------------|---------------------------|-----------------|----------|
| ENST00000504771 | ENSG00000145779 (TNFAIP8) | hsa-miR-146a-5p | 0.700114 |
| UTR3            | 5:118729700-118729721     | 0.009593539     |          |
| UTR3            | 5:118729731-118729753     | 0.001890359     |          |
| UTR3            | 5:118731034-118731057     | 0.001316546     |          |
| UTR3            | 5:118731973-118731989     | 0.001679385     |          |
| UTR3            | 5:118734761-118734784     | 0.010083051     |          |

**Supplementary table 4: targets for miRNAs hsa-miR-146a-5p**
